# Supplementary material for: Comparative transcriptomic and physiological analyses of weedy rice and cultivated rice to identify vital differentially expressed genes and pathways regulating the ABA response
Source: PubMed Central journal article supplement (PMC8213743; doi:10.1038/s41598-021-92504-5), 2021-06-18
Supplement: 41598_2021_92504_MOESM1_ESM.pdf [file 41598_2021_92504_MOESM1_ESM.pdf]

**Comparative transcriptomic and physiological analyses of weedy rice and cultivated rice to identify vital differentially expressed genes and pathways regulating the ABA response**

Hong Lang<sup>1</sup>, Yuting He<sup>1</sup>, Faliang Zeng<sup>1</sup>, Fan Xu<sup>1</sup>, Minghui Zhao<sup>1</sup>, Dianrong Ma<sup>1,2</sup>

<sup>1</sup>Rice Research Institute of Shenyang Agricultural University, Key Laboratory of Northern Japonica Rice Genetics and Breeding, Ministry of Education and Liaoning Province, Key Laboratory of Northeast Rice Biology and Genetics and Breeding, Ministry of Agriculture, Shenyang 110866, China

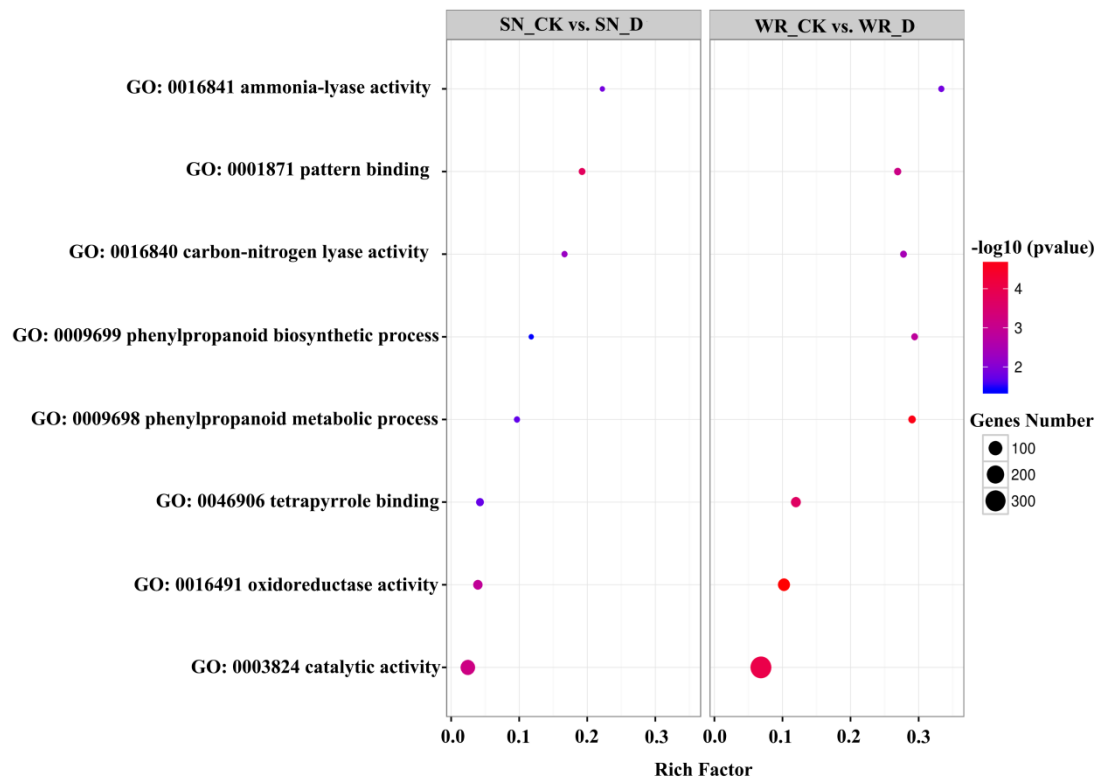

**Figure S1** Gene ontology analysis of similar GO terms between WR04-6 and SN9816 after exposure to diniconazole. D in WR\_D or SN\_D indicates diniconazole treatment, and CK in WR\_CK or SN\_CK indicates the control group without treatment.

**Table S1.** Summary details of the RNA sequencing results for eighteen leaf samples of WR04-6 and SN9816 after ABA and diniconazole treatment.

| <b>Group</b> | <b>Samples</b> | <b>Raw reads</b> | <b>Clean reads</b> | <b>Total mapped (%)</b> | <b>GC (%)</b> | <b>Q20 (%)</b> | <b>Q30 (%)</b> |
|--------------|----------------|------------------|--------------------|-------------------------|---------------|----------------|----------------|
|              | WR_CK_1        | 53549036         | 53422588           | 96.7                    | 55.45         | 97.82          | 93.88          |
| WR_CK        | WR_CK_2        | 47926634         | 47846308           | 96.85                   | 54.89         | 97.95          | 94.01          |
|              | WR_CK_3        | 53769818         | 53644604           | 96.65                   | 54.02         | 97.81          | 93.85          |
|              | WR_A_1         | 47310438         | 47207728           | 97.02                   | 55.15         | 97.75          | 93.59          |
| WR_A         | WR_A_2         | 56375100         | 56241814           | 96.88                   | 53.82         | 97.92          | 94.21          |
|              | WR_A_3         | 65621634         | 65486240           | 97.06                   | 55.52         | 97.99          | 94.36          |
|              | WR_D_1         | 58872000         | 58746030           | 96.53                   | 54.06         | 97.98          | 94.33          |
| WR_D         | WR_D_2         | 55722280         | 55598808           | 96.71                   | 53.92         | 98.11          | 94.64          |
|              | WR_D_3         | 53498312         | 53385098           | 96.43                   | 55.07         | 97.83          | 93.94          |
|              | SN_CK_1        | 43769394         | 43690262           | 96.84                   | 54.47         | 98.06          | 94.49          |
| SN_CK        | SN_CK_2        | 37780812         | 37695718           | 96.42                   | 53.85         | 97.85          | 94.03          |
|              | SN_CK_3        | 52919878         | 52794934           | 96.54                   | 53.86         | 97.56          | 93.23          |
|              | SN_A_1         | 60520142         | 60393278           | 97.06                   | 55.7          | 97.88          | 93.95          |
| SN_A         | SN_A_2         | 45169776         | 45083542           | 96.59                   | 54.52         | 98.01          | 94.34          |
|              | SN_A_3         | 66824966         | 66701164           | 97.39                   | 55.87         | 97.78          | 93.67          |
|              | SN_D_1         | 54921596         | 54799182           | 96.73                   | 54.18         | 97.82          | 93.89          |
| SN_D         | SN_D_2         | 58494748         | 58372434           | 96.82                   | 54.06         | 97.89          | 94.12          |
|              | SN_D_3         | 53510914         | 53405292           | 97.02                   | 54.92         | 97.84          | 93.79          |

**Table S2.** Statistical data of total differentially expressed genes (DEGs) for WR\_CK vs. WR\_A.

| id                     | WR_CK<br>_mean | WR_A<br>_mean | log2(fc) | PValue   | FDR      | Symbol       |
|------------------------|----------------|---------------|----------|----------|----------|--------------|
| LOC_Os03g25490         | 0.1400         | 4.4067        | 4.9762   | 9.00E-34 | 2.49E-29 | CYP734A1     |
| LOC_Os01g22249         | 24.1833        | 2.9767        | -3.0222  | 3.55E-29 | 4.92E-25 | PER1         |
| LOC_Os01g02930         | 0.6933         | 8.0467        | 3.5368   | 5.27E-28 | 4.87E-24 | pomgnt2      |
| LOC_Os04g41640         | 23.8800        | 153.9500      | 2.6886   | 1.21E-26 | 8.42E-23 | Cht4         |
| LOC_Os04g34290         | 6.2500         | 0.4767        | -3.7128  | 1.93E-25 | 1.07E-21 | At2g19130    |
| LOC_Os02g54140         | 0.5800         | 9.2200        | 3.9906   | 7.07E-24 | 3.27E-20 | HSP18.6      |
| LOC_Os01g73250         | 297.1500       | 32.3567       | -3.1991  | 4.09E-22 | 1.62E-18 | ASR2         |
| LOC_Os08g26230         | 34.9133        | 1.1000        | -4.9882  | 9.08E-22 | 3.15E-18 | -            |
| LOC_Os06g21240         | 4.2600         | 34.2800       | 3.0084   | 1.78E-19 | 5.47E-16 | -            |
| LOC_Os04g41620         | 60.1367        | 291.0067      | 2.2747   | 1.62E-18 | 4.43E-15 | Cht4         |
| LOC_Os03g16920         | 0.4167         | 9.6833        | 4.5385   | 1.76E-18 | 4.43E-15 | HSP70        |
| LOC_Os12g43450         | 15.8867        | 110.6933      | 2.8007   | 5.23E-18 | 1.21E-14 | tlp          |
| LOC_Os04g41680         | 18.6000        | 86.5567       | 2.2183   | 7.78E-18 | 1.66E-14 | Cht5         |
| LOC_Os11g24070         | 8.0067         | 89.0867       | 3.4759   | 2.11E-16 | 4.18E-13 | LTP          |
| LOC_Os01g62260         | 0.1300         | 6.9867        | 5.7480   | 3.26E-16 | 6.03E-13 | -            |
| LOC_Os11g41034         | 28.5433        | 3.2267        | -3.1450  | 1.20E-15 | 2.09E-12 | -            |
| LOC_Os03g60580         | 31.3467        | 353.7867      | 3.4965   | 2.22E-15 | 3.62E-12 | ADF3         |
| LOC_Os06g13720         | 0.9067         | 13.8733       | 3.9356   | 8.17E-15 | 1.24E-11 | Os06g0246500 |
| LOC_Os01g54030         | 0.4867         | 9.3133        | 4.2583   | 8.51E-15 | 1.24E-11 | -            |
| ChrSy.fgenes.h.gene.14 | 1.8600         | 0.0010        | -10.8611 | 1.04E-14 | 1.44E-11 | WAK3         |
| LOC_Os11g46900         | 2.1567         | 0.0010        | -11.0746 | 1.11E-14 | 1.46E-11 | WAK5         |
| LOC_Os01g02780         | 6.7633         | 0.0700        | -6.5942  | 1.16E-14 | 1.46E-11 | At1g67000    |
| LOC_Os04g31710         | 0.2433         | 6.4133        | 4.7201   | 1.21E-14 | 1.46E-11 | -            |
| LOC_Os01g12580         | 0.3000         | 5.8300        | 4.2805   | 3.44E-14 | 3.97E-11 | LEA14-A      |
| LOC_Os02g13800         | 1.1600         | 12.0500       | 3.3768   | 8.12E-14 | 9.00E-11 | HSFC2A       |
| LOC_Os01g24710         | 5.3733         | 88.5300       | 4.0423   | 1.51E-13 | 1.61E-10 | SALT         |
| LOC_Os06g17000         | 0.0300         | 5.5433        | 7.5296   | 2.22E-13 | 2.28E-10 | BURP10       |
| LOC_Os08g15149         | 27.8200        | 1.1267        | -4.6260  | 3.25E-13 | 3.17E-10 | -            |
| LOC_Os09g17560         | 0.1733         | 3.9867        | 4.5236   | 3.32E-13 | 3.17E-10 | ZRP4         |
| LOC_Os05g50260         | 0.1000         | 1.9867        | 4.3123   | 3.43E-13 | 3.17E-10 | At1g48100    |
| LOC_Os02g04780         | 0.1400         | 5.1467        | 5.2001   | 4.31E-13 | 3.86E-10 | -            |
| LOC_Os02g18070         | 1.6200         | 0.0500        | -5.0179  | 5.58E-13 | 4.84E-10 | RGA2         |
| LOC_Os12g32760         | 0.7733         | 22.7833       | 4.8807   | 1.50E-12 | 1.26E-09 | PLT5         |
| LOC_Os12g17160         | 2.5867         | 22.7867       | 3.1390   | 2.93E-12 | 2.35E-09 | SOT5         |
| LOC_Os06g48210         | 1.1433         | 14.1233       | 3.6268   | 2.97E-12 | 2.35E-09 | Os06g0697200 |
| LOC_Os02g30100         | 2.4833         | 22.9000       | 3.2050   | 3.40E-12 | 2.62E-09 | CYP81E7      |
| LOC_Os07g14740         | 48.8300        | 5.0333        | -3.2782  | 3.85E-12 | 2.89E-09 | -            |
| LOC_Os11g47550         | 0.1233         | 7.9400        | 6.0085   | 4.17E-12 | 3.05E-09 | Chib3H-h     |
| LOC_Os10g28080         | 9.9800         | 57.2533       | 2.5202   | 4.41E-12 | 3.13E-09 | -            |

|                |         |          |          |          |          |              |
|----------------|---------|----------|----------|----------|----------|--------------|
| LOC_Os02g16995 | 2.9967  | 0.4667   | -2.6829  | 5.85E-12 | 3.97E-09 | -            |
| LOC_Os01g68740 | 11.8267 | 0.9733   | -3.6030  | 5.87E-12 | 3.97E-09 | -            |
| LOC_Os03g19290 | 3.2833  | 32.8800  | 3.3240   | 6.03E-12 | 3.98E-09 | OEP162       |
| LOC_Os02g47390 | 0.8167  | 33.3333  | 5.3511   | 7.01E-12 | 4.52E-09 | -            |
| LOC_Os06g09660 | 2.3700  | 8.3733   | 1.8209   | 8.62E-12 | 5.43E-09 | ARF16        |
| LOC_Os01g52240 | 0.0010  | 40.3500  | 15.3003  | 1.05E-11 | 6.48E-09 | CAB2R        |
| LOC_Os09g04339 | 2.8133  | 37.2067  | 3.7252   | 1.21E-11 | 7.27E-09 | -            |
| LOC_Os06g46149 | 54.0333 | 4.0733   | -3.7296  | 1.32E-11 | 7.80E-09 | -            |
| MSTRG.17789    | 0.0767  | 5.6933   | 6.2145   | 1.41E-11 | 8.14E-09 | --           |
| LOC_Os06g46900 | 2.2067  | 14.1633  | 2.6822   | 2.16E-11 | 1.22E-08 | comA         |
| LOC_Os09g02180 | 2.1400  | 32.9067  | 3.9427   | 2.43E-11 | 1.35E-08 | -            |
| LOC_Os12g27830 | 0.0400  | 3.4467   | 6.4291   | 3.49E-11 | 1.90E-08 | HSD1         |
| LOC_Os04g45810 | 16.5933 | 88.3133  | 2.4120   | 5.27E-11 | 2.81E-08 | HOX22        |
| LOC_Os09g19380 | 2.4967  | 0.0010   | -11.2858 | 7.32E-11 | 3.83E-08 | At1g51890    |
| LOC_Os04g30240 | 7.3867  | 1.0833   | -2.7694  | 9.55E-11 | 4.90E-08 | WAK2         |
| LOC_Os06g45710 | 1.7800  | 17.7800  | 3.3203   | 1.46E-10 | 7.36E-08 | -            |
| LOC_Os03g52370 | 2.5267  | 19.0500  | 2.9145   | 1.54E-10 | 7.63E-08 | -            |
| LOC_Os03g48760 | 0.2333  | 8.1333   | 5.1234   | 1.59E-10 | 7.71E-08 | Os03g0694000 |
| LOC_Os11g26790 | 32.7233 | 673.6200 | 4.3635   | 1.62E-10 | 7.73E-08 | RAB21        |
| LOC_Os05g44340 | 0.3633  | 3.7233   | 3.3572   | 1.74E-10 | 8.17E-08 | CLPB1        |
| LOC_Os12g03040 | 0.2900  | 1.8933   | 2.7068   | 1.79E-10 | 8.28E-08 | ONAC010      |
| LOC_Os11g37970 | 21.2867 | 87.1333  | 2.0333   | 1.93E-10 | 8.75E-08 | PR4A         |
| LOC_Os03g42830 | 1.1300  | 5.8100   | 2.3622   | 2.02E-10 | 9.02E-08 | TT12         |
| LOC_Os05g33130 | 0.6333  | 11.5500  | 4.1888   | 2.07E-10 | 9.13E-08 | Cht2         |
| LOC_Os12g03899 | 9.3967  | 31.3433  | 1.7379   | 2.17E-10 | 9.41E-08 | ZIFL1        |
| LOC_Os01g32780 | 20.1500 | 129.4267 | 2.6833   | 2.63E-10 | 1.12E-07 | At3g01520    |
| LOC_Os06g02040 | 0.8433  | 6.0067   | 2.8324   | 3.91E-10 | 1.64E-07 | -            |
| MSTRG.990      | 10.2833 | 2.6733   | -1.9436  | 4.16E-10 | 1.72E-07 | --           |
| LOC_Os08g29760 | 0.4233  | 4.1667   | 3.2990   | 4.61E-10 | 1.88E-07 | -            |
| LOC_Os01g71710 | 8.2200  | 0.7200   | -3.5131  | 5.42E-10 | 2.18E-07 | BAT1         |
| LOC_Os01g47300 | 0.2100  | 6.5733   | 4.9682   | 5.83E-10 | 2.31E-07 | -            |
| LOC_Os03g21710 | 2.5300  | 0.0767   | -5.0444  | 6.84E-10 | 2.67E-07 | WRKY70       |
| LOC_Os03g02050 | 0.4100  | 9.2267   | 4.4921   | 7.58E-10 | 2.92E-07 | LTP-2        |
| LOC_Os09g19400 | 1.2400  | 0.0010   | -10.2761 | 7.94E-10 | 3.02E-07 | At1g51810    |
| LOC_Os05g31890 | 2.0867  | 0.1467   | -3.8306  | 8.32E-10 | 3.12E-07 | -            |
| LOC_Os03g12890 | 7.0233  | 53.8233  | 2.9380   | 8.51E-10 | 3.15E-07 | BCAT5        |
| LOC_Os04g52190 | 7.7600  | 0.9933   | -2.9657  | 8.98E-10 | 3.25E-07 | VSR7         |
| LOC_Os08g15710 | 1.3033  | 0.0010   | -10.3480 | 9.04E-10 | 3.25E-07 | -            |
| LOC_Os05g39770 | 2.5100  | 41.1000  | 4.0334   | 9.91E-10 | 3.52E-07 | At3g08860    |
| LOC_Os11g26760 | 8.6767  | 77.1800  | 3.1530   | 1.07E-09 | 3.77E-07 | RAB16C       |
| LOC_Os02g50700 | 1.3967  | 7.0567   | 2.3370   | 1.14E-09 | 3.96E-07 | -            |
| LOC_Os11g02480 | 3.3200  | 9.4567   | 1.5101   | 1.26E-09 | 4.31E-07 | WRKY55       |
| LOC_Os09g19390 | 1.9167  | 0.0010   | -10.9044 | 1.30E-09 | 4.39E-07 | At1g05700    |

|                |         |          |         |          |          |              |
|----------------|---------|----------|---------|----------|----------|--------------|
| LOC_Os12g37690 | 1.6967  | 14.9167  | 3.1362  | 1.32E-09 | 4.42E-07 | MYB108       |
| LOC_Os03g13140 | 1.5433  | 127.2700 | 6.3657  | 1.40E-09 | 4.61E-07 | HB1          |
| MSTRG.26079    | 0.6433  | 15.3967  | 4.5809  | 1.62E-09 | 5.27E-07 | --           |
| LOC_Os03g22680 | 1.7233  | 6.7067   | 1.9604  | 1.71E-09 | 5.53E-07 | Rchy1        |
| LOC_Os11g26750 | 0.3700  | 5.3633   | 3.8575  | 1.83E-09 | 5.84E-07 | RAB16D       |
| LOC_Os07g44430 | 0.1833  | 2.2700   | 3.6302  | 1.97E-09 | 6.21E-07 | Os07g0638300 |
| LOC_Os12g42070 | 6.3467  | 1.9667   | -1.6902 | 2.24E-09 | 6.94E-07 | WAK2         |
| LOC_Os01g04380 | 0.6933  | 4.7200   | 2.7672  | 2.25E-09 | 6.94E-07 | HSP16.9B     |
| LOC_Os06g05320 | 4.6133  | 12.7800  | 1.4700  | 2.54E-09 | 7.73E-07 | -            |
| LOC_Os03g48750 | 0.5267  | 18.1667  | 5.1083  | 3.11E-09 | 9.38E-07 | Os03g0693700 |
| LOC_Os12g16540 | 8.4033  | 1.6700   | -2.3311 | 3.33E-09 | 9.91E-07 | WAK3         |
| LOC_Os04g43170 | 0.1033  | 2.6167   | 4.6624  | 3.43E-09 | 1.01E-06 | SOP1         |
| LOC_Os03g16940 | 0.3867  | 8.2533   | 4.4158  | 4.26E-09 | 1.24E-06 | -            |
| LOC_Os04g40070 | 0.3833  | 2.0600   | 2.4260  | 4.53E-09 | 1.31E-06 | At5g50170    |
| LOC_Os04g22120 | 0.8667  | 0.0300   | -4.8524 | 5.68E-09 | 1.62E-06 | LECRK91      |
| LOC_Os11g47530 | 0.0633  | 6.3033   | 6.6370  | 6.27E-09 | 1.77E-06 | Chib3H-h     |
| LOC_Os06g03560 | 44.2867 | 11.5100  | -1.9440 | 6.58E-09 | 1.84E-06 | OPT7         |
| LOC_Os03g19600 | 0.0900  | 0.9567   | 3.4100  | 6.79E-09 | 1.88E-06 | TRO          |
| LOC_Os03g59320 | 20.6400 | 102.2533 | 2.3086  | 6.85E-09 | 1.88E-06 | -            |
| LOC_Os10g12190 | 0.4733  | 2.3967   | 2.3401  | 7.28E-09 | 1.98E-06 | At3g30340    |
| LOC_Os10g25040 | 0.9733  | 7.5000   | 2.9459  | 7.69E-09 | 2.05E-06 | rccR         |
| LOC_Os03g02260 | 2.7733  | 12.4367  | 2.1649  | 7.70E-09 | 2.05E-06 | -            |
| LOC_Os11g03300 | 0.3733  | 1.7500   | 2.2288  | 7.81E-09 | 2.06E-06 | ONAC010      |
| LOC_Os07g09050 | 0.4067  | 4.0833   | 3.3278  | 9.51E-09 | 2.49E-06 | At5g03795    |
| LOC_Os08g42610 | 15.5767 | 4.4067   | -1.8216 | 1.09E-08 | 2.83E-06 | PCMP-H33     |
| LOC_Os12g09720 | 2.6633  | 0.1633   | -4.0273 | 1.39E-08 | 3.56E-06 | GOS9         |
| LOC_Os03g20020 | 7.4067  | 18.9133  | 1.3525  | 1.42E-08 | 3.61E-06 | NIN1         |
| LOC_Os03g52390 | 4.8400  | 44.3667  | 3.1964  | 1.45E-08 | 3.65E-06 | -            |
| LOC_Os01g64000 | 0.0333  | 1.9467   | 5.8679  | 1.52E-08 | 3.80E-06 | ABI5         |
| LOC_Os07g05365 | 0.8767  | 9.0300   | 3.3646  | 1.59E-08 | 3.92E-06 | PSBR         |
| LOC_Os01g01610 | 1.7000  | 6.9400   | 2.0294  | 1.60E-08 | 3.92E-06 | At2g16710    |
| LOC_Os03g12790 | 9.5000  | 1.9400   | -2.2919 | 1.66E-08 | 4.03E-06 | DTXL2        |
| LOC_Os11g19864 | 1.7667  | 23.1900  | 3.7144  | 1.80E-08 | 4.34E-06 | GSTT3        |
| LOC_Os11g05410 | 0.8467  | 9.0700   | 3.4212  | 1.89E-08 | 4.51E-06 | PAP20        |
| LOC_Os01g71720 | 34.8633 | 8.0833   | -2.1087 | 2.00E-08 | 4.75E-06 | BAT1         |
| LOC_Os06g12290 | 0.2533  | 7.8833   | 4.9597  | 2.04E-08 | 4.79E-06 | GSTU10       |
| LOC_Os01g63210 | 13.6033 | 79.9400  | 2.5550  | 2.12E-08 | 4.93E-06 | At3g10130    |
| LOC_Os05g38530 | 2.7267  | 33.7067  | 3.6278  | 2.39E-08 | 5.53E-06 | HSP70        |
| LOC_Os03g04560 | 0.5267  | 0.0333   | -3.9819 | 2.55E-08 | 5.85E-06 | -            |
| LOC_Os03g11910 | 1.2200  | 7.6767   | 2.6536  | 2.85E-08 | 6.49E-06 | HSP70-8      |
| LOC_Os04g12390 | 32.7633 | 9.8167   | -1.7388 | 3.12E-08 | 7.02E-06 | JAL19        |
| LOC_Os07g25810 | 1.8667  | 10.2900  | 2.4627  | 3.23E-08 | 7.22E-06 | Sbsn         |
| LOC_Os12g14440 | 39.9733 | 3.8067   | -3.3924 | 3.27E-08 | 7.26E-06 | SALT         |

|                |          |          |          |          |          |               |
|----------------|----------|----------|----------|----------|----------|---------------|
| LOC_Os04g44830 | 3.2700   | 14.8900  | 2.1870   | 3.53E-08 | 7.77E-06 | Os04g0530600  |
| LOC_Os08g40680 | 0.4633   | 12.0033  | 4.6952   | 4.24E-08 | 9.25E-06 | Chib3H-h      |
| LOC_Os05g47730 | 0.2400   | 5.1433   | 4.4216   | 4.29E-08 | 9.29E-06 | -             |
| LOC_Os02g14760 | 15.0367  | 42.7200  | 1.5064   | 4.65E-08 | 9.99E-06 | CID9          |
| LOC_Os01g12660 | 0.0367   | 0.5500   | 3.9069   | 4.71E-08 | 1.00E-05 | SPCC24B10.10c |
| LOC_Os11g26570 | 4.5433   | 112.8000 | 4.6339   | 4.87E-08 | 1.03E-05 | DHN3          |
| LOC_Os04g39300 | 1.4067   | 0.0010   | -10.4581 | 5.22E-08 | 1.10E-05 | -             |
| MSTRG.27714    | 1.1067   | 7.0900   | 2.6796   | 5.27E-08 | 1.10E-05 | --            |
| LOC_Os02g51110 | 23.8867  | 7.8933   | -1.5975  | 5.34E-08 | 1.10E-05 | NIP2-1        |
| LOC_Os03g44270 | 1.2800   | 0.2200   | -2.5406  | 5.37E-08 | 1.10E-05 | TMM           |
| LOC_Os11g10510 | 0.2000   | 17.8033  | 6.4760   | 5.79E-08 | 1.18E-05 | ADH2          |
| LOC_Os01g52830 | 0.0333   | 1.7167   | 5.6865   | 6.31E-08 | 1.28E-05 | -             |
| LOC_Os05g46370 | 1.0367   | 4.5233   | 2.1254   | 6.38E-08 | 1.28E-05 | BHLH87        |
| LOC_Os06g48300 | 3.7833   | 25.0400  | 2.7265   | 6.41E-08 | 1.28E-05 | Os06g0698300  |
| LOC_Os01g52070 | 0.0100   | 0.8033   | 6.3279   | 6.49E-08 | 1.29E-05 | Os01g0718700  |
| LOC_Os02g15860 | 6.5900   | 156.6200 | 4.5708   | 6.60E-08 | 1.30E-05 | -             |
| LOC_Os12g26290 | 3.9467   | 31.1200  | 2.9791   | 6.85E-08 | 1.34E-05 | DOX1          |
| LOC_Os08g01370 | 3.0767   | 41.4333  | 3.7514   | 8.52E-08 | 1.65E-05 | -             |
| LOC_Os01g72140 | 2.0733   | 0.1467   | -3.8213  | 8.97E-08 | 1.73E-05 | HSP26-A       |
| LOC_Os04g34170 | 15.6433  | 85.3533  | 2.4479   | 9.28E-08 | 1.77E-05 | FP1           |
| LOC_Os07g44060 | 1.7100   | 13.1633  | 2.9445   | 9.35E-08 | 1.78E-05 | -             |
| LOC_Os01g68290 | 0.1733   | 7.6933   | 5.4720   | 1.05E-07 | 1.99E-05 | -             |
| LOC_Os09g09510 | 1.1033   | 0.1033   | -3.4165  | 1.12E-07 | 2.10E-05 | LECRK41       |
| LOC_Os05g33630 | 389.0733 | 136.6667 | -1.5094  | 1.27E-07 | 2.37E-05 | rihA          |
| LOC_Os01g06310 | 1.1567   | 51.3833  | 5.4733   | 1.47E-07 | 2.71E-05 | -             |
| LOC_Os03g17790 | 3.3633   | 48.2567  | 3.8428   | 1.52E-07 | 2.80E-05 | LT101.2       |
| LOC_Os05g23924 | 0.0500   | 0.6800   | 3.7655   | 1.56E-07 | 2.85E-05 | xlnA          |
| LOC_Os07g25800 | 0.8267   | 13.8567  | 4.0671   | 1.57E-07 | 2.85E-05 | At2g05970     |
| LOC_Os10g35050 | 0.1333   | 2.2700   | 4.0896   | 1.67E-07 | 3.00E-05 | TIP3-1        |
| LOC_Os12g38760 | 2.3600   | 0.5267   | -2.1638  | 1.70E-07 | 3.04E-05 | PAP1          |
| LOC_Os01g50910 | 3.4500   | 45.7900  | 3.7304   | 1.75E-07 | 3.11E-05 | LEA3          |
| LOC_Os02g17500 | 37.8700  | 108.4033 | 1.5173   | 1.80E-07 | 3.17E-05 | At1g67300     |
| LOC_Os04g49980 | 1.4033   | 30.2067  | 4.4279   | 1.84E-07 | 3.23E-05 | -             |
| LOC_Os02g56860 | 1.2267   | 10.8933  | 3.1506   | 1.96E-07 | 3.41E-05 | KCS12         |
| LOC_Os05g08970 | 1.4100   | 4.3367   | 1.6209   | 2.01E-07 | 3.47E-05 | SSRP1-B       |
| LOC_Os03g45960 | 2.0400   | 10.0800  | 2.3049   | 2.01E-07 | 3.47E-05 | Zlp           |
| LOC_Os12g38270 | 14.7833  | 77.8933  | 2.3975   | 2.14E-07 | 3.67E-05 | MT4A          |
| LOC_Os11g47500 | 4.3700   | 161.7667 | 5.2101   | 2.19E-07 | 3.72E-05 | RIXI          |
| LOC_Os04g44100 | 0.5633   | 3.4267   | 2.6047   | 2.26E-07 | 3.79E-05 | -             |
| LOC_Os08g43120 | 0.1467   | 0.9600   | 2.7105   | 2.26E-07 | 3.79E-05 | ABCG45        |
| LOC_Os06g51060 | 29.4700  | 297.3033 | 3.3346   | 2.49E-07 | 4.15E-05 | Cht1          |
| LOC_Os08g01910 | 0.8833   | 8.2367   | 3.2210   | 2.58E-07 | 4.29E-05 | -             |
| LOC_Os02g30910 | 0.4000   | 5.9400   | 3.8924   | 2.67E-07 | 4.40E-05 | SWEET15       |

|                |          |          |         |          |          |            |
|----------------|----------|----------|---------|----------|----------|------------|
| LOC_Os05g43690 | 0.2967   | 2.1433   | 2.8529  | 2.73E-07 | 4.49E-05 | PDCB3      |
| LOC_Os11g04104 | 5.0900   | 16.9333  | 1.7341  | 2.83E-07 | 4.62E-05 | ZIFL1      |
| LOC_Os03g46454 | 1.1333   | 22.7600  | 4.3279  | 2.86E-07 | 4.63E-05 | IRT2       |
| LOC_Os10g41749 | 1.9600   | 5.7900   | 1.5627  | 2.87E-07 | 4.63E-05 | SPAC977.11 |
| LOC_Os08g43020 | 0.0333   | 2.9933   | 6.4886  | 2.95E-07 | 4.72E-05 | RAS        |
| MSTRG.23921    | 0.1967   | 3.3900   | 4.1075  | 2.96E-07 | 4.72E-05 | --         |
| LOC_Os04g27670 | 0.2100   | 16.4833  | 6.2945  | 2.99E-07 | 4.74E-05 | -          |
| LOC_Os01g48620 | 0.8733   | 0.0967   | -3.1754 | 3.07E-07 | 4.84E-05 | -          |
| LOC_Os09g25880 | 23.6333  | 6.6233   | -1.8352 | 3.18E-07 | 4.99E-05 | AAP3       |
| LOC_Os02g42190 | 4.9033   | 0.2967   | -4.0468 | 3.46E-07 | 5.39E-05 | WAK4       |
| LOC_Os11g37950 | 7.9633   | 120.2000 | 3.9159  | 3.54E-07 | 5.48E-05 | PR4A       |
| LOC_Os09g19140 | 4.1167   | 1.0000   | -2.0415 | 4.01E-07 | 6.18E-05 | At1g51810  |
| LOC_Os04g52110 | 0.4833   | 4.7333   | 3.2918  | 4.25E-07 | 6.51E-05 | -          |
| LOC_Os01g48610 | 4.5967   | 0.7167   | -2.6812 | 4.29E-07 | 6.52E-05 | -          |
| LOC_Os12g42910 | 0.3533   | 3.8433   | 3.4433  | 4.30E-07 | 6.52E-05 | CCX1       |
| LOC_Os02g46030 | 3.2067   | 18.4900  | 2.5276  | 4.43E-07 | 6.67E-05 | RVE1       |
| LOC_Os10g39130 | 59.8000  | 7.3067   | -3.0329 | 4.60E-07 | 6.88E-05 | MADS56     |
| LOC_Os07g48550 | 8.7367   | 32.6833  | 1.9034  | 4.62E-07 | 6.88E-05 | NAC100     |
| LOC_Os01g04120 | 7.1667   | 1.9700   | -1.8631 | 4.77E-07 | 7.07E-05 | ZFP6       |
| LOC_Os01g12820 | 0.3700   | 3.8033   | 3.3617  | 4.97E-07 | 7.30E-05 | -          |
| LOC_Os10g13850 | 3.6867   | 121.0133 | 5.0367  | 4.99E-07 | 7.30E-05 | -          |
| LOC_Os01g71624 | 9.9600   | 146.1933 | 3.8756  | 5.00E-07 | 7.30E-05 | -          |
| MSTRG.21766    | 0.2200   | 3.2867   | 3.9010  | 5.04E-07 | 7.32E-05 | --         |
| LOC_Os01g03390 | 103.4300 | 552.5333 | 2.4174  | 5.32E-07 | 7.68E-05 | RBBI3.3    |
| LOC_Os04g49850 | 1.1000   | 5.7767   | 2.3927  | 5.52E-07 | 7.93E-05 | -          |
| LOC_Os02g42940 | 7.8267   | 36.1967  | 2.2094  | 5.64E-07 | 8.06E-05 | PVA12      |
| LOC_Os04g27190 | 0.0367   | 1.9333   | 5.7205  | 6.10E-07 | 8.67E-05 | ZSS1       |
| LOC_Os05g45090 | 0.7867   | 5.4100   | 2.7818  | 6.24E-07 | 8.83E-05 | RhGT1      |
| LOC_Os06g19095 | 0.1400   | 10.8500  | 6.2761  | 6.29E-07 | 8.86E-05 | -          |
| MSTRG.22038    | 0.3600   | 4.6467   | 3.6901  | 6.35E-07 | 8.89E-05 | --         |
| LOC_Os08g08840 | 19.5767  | 49.2400  | 1.3307  | 6.45E-07 | 8.99E-05 | GPT2       |
| LOC_Os03g62010 | 37.6867  | 7.7033   | -2.2905 | 6.59E-07 | 9.13E-05 | -          |
| LOC_Os06g46740 | 12.8567  | 169.0400 | 3.7168  | 6.67E-07 | 9.20E-05 | At4g27520  |
| LOC_Os10g33240 | 0.8033   | 2.5033   | 1.6398  | 6.74E-07 | 9.25E-05 | -          |
| LOC_Os03g58610 | 6.1133   | 2.0967   | -1.5439 | 6.85E-07 | 9.36E-05 | -          |
| LOC_Os04g01740 | 0.1100   | 0.8633   | 2.9724  | 7.12E-07 | 9.68E-05 | HSP83A     |
| LOC_Os10g33370 | 1.9133   | 33.4367  | 4.1273  | 7.16E-07 | 9.68E-05 | KCS12      |
| LOC_Os07g48460 | 5.1267   | 30.7300  | 2.5836  | 7.35E-07 | 9.89E-05 | -          |
| LOC_Os05g49300 | 6.1600   | 31.1700  | 2.3392  | 7.49E-07 | 0.0001   | ISU1       |
| LOC_Os03g61920 | 8.9767   | 28.1233  | 1.6475  | 7.58E-07 | 0.0001   | ETFA       |
| LOC_Os03g46060 | 3.9567   | 78.6467  | 4.3130  | 7.63E-07 | 0.0001   | tlp        |
| LOC_Os04g19740 | 0.6200   | 3.0567   | 2.3016  | 7.77E-07 | 0.0001   | -          |
| LOC_Os02g17710 | 1.5700   | 0.2033   | -2.9488 | 8.10E-07 | 0.00011  | At1g35710  |



|                |         |          |         |          |         |              |
|----------------|---------|----------|---------|----------|---------|--------------|
| LOC_Os01g74160 | 5.7000  | 0.3400   | -4.0674 | 8.37E-07 | 0.00011 | -            |
| LOC_Os12g12080 | 2.7700  | 86.1933  | 4.9596  | 8.70E-07 | 0.00011 | -            |
| LOC_Os08g29040 | 2.4133  | 0.1300   | -4.2144 | 8.82E-07 | 0.00011 | WAK3         |
| LOC_Os07g03560 | 0.1100  | 0.0010   | -6.7814 | 8.93E-07 | 0.00012 | TY3B-I       |
| LOC_Os07g14820 | 0.3833  | 0.0010   | -8.5825 | 9.75E-07 | 0.00013 | At3g47570    |
| LOC_Os12g05210 | 1.3867  | 19.4867  | 3.8128  | 9.79E-07 | 0.00013 | -            |
| LOC_Os12g38180 | 53.9800 | 14.9733  | -1.8500 | 9.95E-07 | 0.00013 | HSC-2        |
| LOC_Os12g13380 | 6.2567  | 13.5167  | 1.1113  | 1.01E-06 | 0.00013 | ADK-A        |
| LOC_Os02g39660 | 1.3700  | 0.1333   | -3.3611 | 1.01E-06 | 0.00013 | EFR          |
| LOC_Os09g31478 | 5.8033  | 61.6400  | 3.4089  | 1.01E-06 | 0.00013 | -            |
| LOC_Os03g21040 | 11.9267 | 56.2333  | 2.2372  | 1.02E-06 | 0.00013 | -            |
| LOC_Os11g47560 | 0.6467  | 40.1533  | 5.9564  | 1.13E-06 | 0.00014 | Chib3H-h     |
| LOC_Os11g04720 | 48.6700 | 8.0733   | -2.5918 | 1.15E-06 | 0.00014 | ARR9         |
| LOC_Os06g34970 | 5.6400  | 0.4433   | -3.6692 | 1.16E-06 | 0.00014 | CNR13        |
| LOC_Os11g26780 | 5.9867  | 112.5667 | 4.2329  | 1.22E-06 | 0.00015 | RAB16B       |
| LOC_Os12g09220 | 3.7433  | 1.0500   | -1.8339 | 1.24E-06 | 0.00015 | -            |
| LOC_Os01g06560 | 0.2067  | 8.0200   | 5.2782  | 1.25E-06 | 0.00015 | TGA6         |
| LOC_Os06g45184 | 2.2633  | 58.0700  | 4.6813  | 1.28E-06 | 0.00015 | -            |
| LOC_Os05g31670 | 0.8867  | 14.8133  | 4.0624  | 1.36E-06 | 0.00016 | -            |
| LOC_Os03g17800 | 3.1600  | 11.3433  | 1.8438  | 1.37E-06 | 0.00016 | rdgBbeta     |
| LOC_Os08g26350 | 0.8367  | 0.0010   | -9.7085 | 1.39E-06 | 0.00017 | -            |
| LOC_Os06g44300 | 0.4433  | 2.0933   | 2.2393  | 1.42E-06 | 0.00017 | CER3         |
| LOC_Os10g30010 | 0.1233  | 1.8200   | 3.8833  | 1.46E-06 | 0.00017 | -            |
| LOC_Os08g02030 | 1.2000  | 21.2267  | 4.1448  | 1.48E-06 | 0.00017 | At3g50280    |
| LOC_Os03g51350 | 4.1300  | 45.3900  | 3.4582  | 1.49E-06 | 0.00017 | -            |
| LOC_Os01g51210 | 3.7567  | 12.0867  | 1.6859  | 1.52E-06 | 0.00018 | LOGL1        |
| LOC_Os07g43950 | 4.4233  | 28.5533  | 2.6905  | 1.54E-06 | 0.00018 | SCL30A       |
| LOC_Os10g28120 | 13.9267 | 55.6267  | 1.9979  | 1.55E-06 | 0.00018 | -            |
| LOC_Os01g58194 | 13.5467 | 46.1467  | 1.7683  | 1.60E-06 | 0.00018 | Os01g0794400 |
| LOC_Os04g50200 | 0.1267  | 1.1933   | 3.2359  | 1.66E-06 | 0.00019 | -            |
| LOC_Os11g47520 | 0.0200  | 3.5433   | 7.4690  | 1.70E-06 | 0.00019 | Chib3H-h     |
| LOC_Os04g48200 | 0.3967  | 7.0433   | 4.1503  | 1.70E-06 | 0.00019 | CYP87A3      |
| MSTRG.10545    | 0.7600  | 20.3667  | 4.7441  | 1.71E-06 | 0.00019 | --           |
| LOC_Os09g21919 | 0.0333  | 0.8133   | 4.6088  | 1.73E-06 | 0.0002  | -            |
| LOC_Os07g23640 | 0.5700  | 3.5667   | 2.6455  | 1.76E-06 | 0.0002  | -            |
| LOC_Os06g35940 | 36.8900 | 5.7567   | -2.6799 | 1.77E-06 | 0.0002  | HD3A         |
| LOC_Os04g57140 | 5.1033  | 14.7700  | 1.5332  | 1.81E-06 | 0.0002  | Os04g0666900 |
| MSTRG.26475    | 2.7767  | 0.2833   | -3.2928 | 1.89E-06 | 0.00021 | --           |
| LOC_Os11g20090 | 0.4067  | 7.4633   | 4.1979  | 1.95E-06 | 0.00022 | OMT2         |
| LOC_Os01g58670 | 4.3733  | 80.3933  | 4.2003  | 1.97E-06 | 0.00022 | NSFBx        |
| MSTRG.3995     | 0.0700  | 2.7933   | 5.3185  | 2.11E-06 | 0.00023 | --           |
| LOC_Os10g21590 | 0.9933  | 10.1500  | 3.3531  | 2.12E-06 | 0.00023 | PLT6         |
| LOC_Os11g45930 | 1.7233  | 0.3967   | -2.1192 | 2.17E-06 | 0.00024 | RXW24L       |

|                |           |           |         |          |         |              |
|----------------|-----------|-----------|---------|----------|---------|--------------|
| LOC_Os12g21789 | 6.8267    | 18.2233   | 1.4165  | 2.30E-06 | 0.00025 | -            |
| LOC_Os09g09930 | 16.4500   | 67.2000   | 2.0304  | 2.37E-06 | 0.00026 | -            |
| LOC_Os03g19427 | 2.7333    | 159.7967  | 5.8694  | 2.41E-06 | 0.00026 | NAS1         |
| LOC_Os03g59600 | 1.3800    | 0.1833    | -2.9121 | 2.56E-06 | 0.00027 | MIRO1        |
| LOC_Os01g58640 | 1.0533    | 4.9767    | 2.2402  | 2.58E-06 | 0.00028 | PAP27        |
| LOC_Os02g51750 | 25.7933   | 89.2333   | 1.7906  | 2.69E-06 | 0.00029 | ANNAT7       |
| LOC_Os12g13270 | 2.5167    | 0.4567    | -2.4623 | 2.72E-06 | 0.00029 | -            |
| LOC_Os02g38290 | 0.0267    | 0.7967    | 4.9009  | 2.72E-06 | 0.00029 | CYP86B1      |
| LOC_Os11g02389 | 1180.5167 | 3140.9033 | 1.4118  | 2.79E-06 | 0.00029 | LTP          |
| LOC_Os01g40280 | 1.8767    | 8.7700    | 2.2244  | 2.82E-06 | 0.0003  | SPBC776.05   |
| LOC_Os12g39360 | 20.4467   | 1.0467    | -4.2880 | 2.83E-06 | 0.0003  | nep1         |
| LOC_Os11g19850 | 3.6267    | 40.7600   | 3.4904  | 2.85E-06 | 0.0003  | -            |
| LOC_Os01g62290 | 2.5233    | 33.4767   | 3.7298  | 2.90E-06 | 0.0003  | HSP70        |
| LOC_Os12g18410 | 7.6333    | 203.4400  | 4.7361  | 3.03E-06 | 0.00031 | -            |
| LOC_Os06g06560 | 1.1967    | 4.5767    | 1.9353  | 3.13E-06 | 0.00032 | Os06g0160700 |
| LOC_Os02g45860 | 17.8567   | 2.7100    | -2.7201 | 3.19E-06 | 0.00033 | -            |
| LOC_Os05g31020 | 2.8300    | 36.2633   | 3.6796  | 3.22E-06 | 0.00033 | ERF1-2       |
| LOC_Os09g19280 | 8.0133    | 1.0233    | -2.9691 | 3.25E-06 | 0.00033 | RPM1         |
| LOC_Os01g02790 | 8.1667    | 1.4267    | -2.5171 | 3.25E-06 | 0.00033 | At5g39030    |
| LOC_Os05g24770 | 0.1000    | 2.5333    | 4.6630  | 3.25E-06 | 0.00033 | RTNLB1       |
| LOC_Os04g48416 | 0.5433    | 2.2633    | 2.0585  | 3.28E-06 | 0.00033 | SBT1.7       |
| LOC_Os07g10600 | 8.9800    | 25.5267   | 1.5072  | 3.55E-06 | 0.00036 | Smt1-1       |
| LOC_Os01g45640 | 8.2633    | 62.8967   | 2.9282  | 3.59E-06 | 0.00036 | -            |
| LOC_Os05g50380 | 1.7867    | 7.8133    | 2.1287  | 3.71E-06 | 0.00037 | AGP-L        |
| LOC_Os05g25430 | 2.0600    | 0.7467    | -1.4641 | 3.90E-06 | 0.00039 | FER          |
| LOC_Os12g43490 | 1.0033    | 5.2667    | 2.3921  | 3.92E-06 | 0.00039 | tlp          |
| LOC_Os03g04770 | 27.1400   | 118.9233  | 2.1315  | 3.98E-06 | 0.00039 | BAM1         |
| LOC_Os12g42220 | 16.4500   | 5.3367    | -1.6241 | 4.44E-06 | 0.00044 | -            |
| LOC_Os01g62900 | 2.3033    | 6.5400    | 1.5056  | 4.44E-06 | 0.00044 | P5CS         |
| LOC_Os01g28450 | 11.5933   | 1.0367    | -3.4833 | 4.73E-06 | 0.00046 | -            |
| LOC_Os03g36279 | 0.2033    | 9.3267    | 5.5194  | 4.85E-06 | 0.00047 | GIN1         |
| LOC_Os06g29730 | 19.9867   | 2.0600    | -3.2783 | 4.93E-06 | 0.00048 | -            |
| LOC_Os02g07160 | 11.6733   | 59.2500   | 2.3436  | 4.96E-06 | 0.00048 | -            |
| LOC_Os01g41780 | 1.0333    | 0.2367    | -2.1264 | 5.19E-06 | 0.0005  | BRI1         |
| LOC_Os02g44770 | 0.3400    | 1.3367    | 1.9750  | 5.23E-06 | 0.0005  | MSL8         |
| LOC_Os10g42490 | 2.2133    | 0.7067    | -1.6471 | 5.32E-06 | 0.00051 | ROC3         |
| LOC_Os01g36790 | 1.3767    | 10.6967   | 2.9579  | 5.35E-06 | 0.00051 | CRK2         |
| LOC_Os01g42320 | 0.0533    | 0.5567    | 3.3837  | 5.42E-06 | 0.00051 | ASPG1        |
| LOC_Os03g03070 | 22.6000   | 8.2300    | -1.4574 | 5.42E-06 | 0.00051 | MADS50       |
| LOC_Os06g40180 | 7.0400    | 0.6733    | -3.3862 | 5.46E-06 | 0.00051 | PLD2         |
| LOC_Os06g09560 | 0.9300    | 4.4567    | 2.2607  | 5.48E-06 | 0.00051 | dnaJ         |
| LOC_Os02g54180 | 0.6467    | 8.1833    | 3.6616  | 5.52E-06 | 0.00052 | -            |
| LOC_Os03g18130 | 7.5133    | 77.3300   | 3.3635  | 5.53E-06 | 0.00052 | Os03g0291500 |

|                |          |          |         |          |         |              |
|----------------|----------|----------|---------|----------|---------|--------------|
| LOC_Os07g20340 | 0.0467   | 4.8367   | 6.6955  | 5.58E-06 | 0.00052 | HIPP26       |
| LOC_Os01g03680 | 5.1833   | 0.2567   | -4.3359 | 5.67E-06 | 0.00053 | RBBI3.3      |
| LOC_Os01g72810 | 0.8267   | 14.7500  | 4.1573  | 5.71E-06 | 0.00053 | EP1          |
| LOC_Os09g04370 | 0.7967   | 15.8400  | 4.3135  | 5.85E-06 | 0.00054 | -            |
| LOC_Os03g60370 | 4.6533   | 21.3033  | 2.1947  | 5.86E-06 | 0.00054 | mipp1        |
| LOC_Os02g43410 | 0.1400   | 6.9500   | 5.6335  | 5.91E-06 | 0.00054 | YSL15        |
| LOC_Os01g28500 | 154.2000 | 319.8533 | 1.0526  | 5.92E-06 | 0.00054 | PRMS         |
| LOC_Os02g02930 | 3.9167   | 0.0833   | -5.5546 | 5.94E-06 | 0.00054 | -            |
| LOC_Os03g61160 | 6.9100   | 89.0467  | 3.6878  | 6.04E-06 | 0.00055 | -            |
| LOC_Os06g38764 | 30.0833  | 4.5000   | -2.7410 | 6.13E-06 | 0.00055 | -            |
| LOC_Os07g22390 | 10.6100  | 3.1000   | -1.7751 | 6.16E-06 | 0.00055 | SGR2         |
| LOC_Os08g40250 | 11.4033  | 25.4433  | 1.1578  | 6.25E-06 | 0.00056 | PPI1         |
| LOC_Os03g27980 | 0.5667   | 5.7300   | 3.3380  | 6.27E-06 | 0.00056 | At4g31140    |
| LOC_Os04g50700 | 1.6967   | 16.5500  | 3.2861  | 6.28E-06 | 0.00056 | -            |
| LOC_Os05g39320 | 0.3067   | 3.6800   | 3.5850  | 6.30E-06 | 0.00056 | PDC1         |
| LOC_Os08g34500 | 0.1633   | 3.0667   | 4.2308  | 6.31E-06 | 0.00056 | -            |
| LOC_Os11g19840 | 8.6633   | 60.9900  | 2.8156  | 6.38E-06 | 0.00056 | OMT2         |
| LOC_Os11g40930 | 4.5200   | 0.3000   | -3.9133 | 6.49E-06 | 0.00057 | -            |
| LOC_Os10g35070 | 77.8900  | 296.0533 | 1.9263  | 6.57E-06 | 0.00058 | AGAL1        |
| LOC_Os07g31960 | 0.2367   | 1.4067   | 2.5714  | 6.58E-06 | 0.00058 | RhGT1        |
| LOC_Os08g29600 | 4.1200   | 16.5767  | 2.0084  | 6.75E-06 | 0.00059 | -            |
| LOC_Os12g16720 | 8.3933   | 30.1367  | 1.8442  | 6.96E-06 | 0.00061 | CYP71A9      |
| LOC_Os09g29690 | 1.9267   | 21.9300  | 3.5087  | 7.37E-06 | 0.00064 | CjBAp12      |
| LOC_Os03g07200 | 1.1367   | 5.4300   | 2.2561  | 7.43E-06 | 0.00064 | -            |
| LOC_Os05g46480 | 28.4200  | 500.9567 | 4.1397  | 7.46E-06 | 0.00064 | LEA3         |
| LOC_Os02g37480 | 1.3700   | 21.3933  | 3.9649  | 7.57E-06 | 0.00065 | -            |
| LOC_Os02g15950 | 2.3633   | 7.1233   | 1.5917  | 7.74E-06 | 0.00066 | At3g61590    |
| LOC_Os01g71740 | 0.4467   | 1.4733   | 1.7218  | 8.08E-06 | 0.00069 | BAT1         |
| LOC_Os06g34960 | 1.8767   | 0.1400   | -3.7447 | 8.14E-06 | 0.00069 | At1g67520    |
| LOC_Os05g32460 | 4.5300   | 0.8100   | -2.4835 | 8.16E-06 | 0.00069 | SIB1         |
| LOC_Os09g29710 | 1.0267   | 22.4800  | 4.4526  | 8.26E-06 | 0.0007  | CjBAp12      |
| LOC_Os01g27449 | 0.7967   | 3.8233   | 2.2628  | 8.43E-06 | 0.00071 | -            |
| LOC_Os03g30950 | 0.4333   | 5.7800   | 3.7375  | 8.75E-06 | 0.00074 | Os03g0423300 |
| LOC_Os11g05800 | 4.5433   | 0.5533   | -3.0375 | 8.79E-06 | 0.00074 | HVA22J       |
| LOC_Os12g43720 | 2.5867   | 14.6967  | 2.5063  | 8.92E-06 | 0.00074 | RXW8         |
| LOC_Os01g57370 | 0.0010   | 0.2333   | 7.8662  | 8.95E-06 | 0.00074 | CNGC4        |
| LOC_Os10g03570 | 1.1833   | 0.2367   | -2.3219 | 8.96E-06 | 0.00074 | RPM1         |
| LOC_Os07g02850 | 0.4800   | 3.9533   | 3.0420  | 8.97E-06 | 0.00074 | -            |
| LOC_Os07g26550 | 0.4233   | 2.5767   | 2.6056  | 8.97E-06 | 0.00074 | -            |
| LOC_Os04g48390 | 4.6400   | 25.5467  | 2.4609  | 9.01E-06 | 0.00074 | Os04g0573000 |
| LOC_Os01g16170 | 11.7233  | 74.9000  | 2.6756  | 9.02E-06 | 0.00074 | YPQ1         |
| LOC_Os01g65110 | 5.5067   | 74.4367  | 3.7568  | 9.33E-06 | 0.00076 | NPF5.10      |
| LOC_Os06g14030 | 12.9767  | 34.6633  | 1.4175  | 9.34E-06 | 0.00076 | Os06g0250600 |

|                |         |          |         |          |         |              |
|----------------|---------|----------|---------|----------|---------|--------------|
| LOC_Os02g54254 | 7.8867  | 78.9467  | 3.3234  | 9.57E-06 | 0.00078 | LKR/SDH      |
| LOC_Os10g42040 | 2.6600  | 0.1300   | -4.3548 | 9.60E-06 | 0.00078 | -            |
| LOC_Os04g33460 | 16.2300 | 36.4833  | 1.1686  | 1.03E-05 | 0.00083 | SBE2.2       |
| LOC_Os07g19320 | 0.0010  | 0.1633   | 7.3517  | 1.07E-05 | 0.00086 | RPM1         |
| LOC_Os02g58100 | 0.2900  | 11.3400  | 5.2892  | 1.09E-05 | 0.00087 | -            |
| LOC_Os02g56380 | 5.0800  | 1.3733   | -1.8871 | 1.09E-05 | 0.00087 | WAK3         |
| LOC_Os09g09490 | 1.1600  | 0.3867   | -1.5850 | 1.09E-05 | 0.00087 | RPM1         |
| LOC_Os07g44330 | 14.7267 | 119.2667 | 3.0177  | 1.11E-05 | 0.00088 | PDK          |
| LOC_Os10g37660 | 1.1533  | 8.6167   | 2.9013  | 1.12E-05 | 0.00089 | Os10g0521000 |
| LOC_Os02g46860 | 1.3133  | 4.1600   | 1.6634  | 1.14E-05 | 0.0009  | OPT4         |
| LOC_Os07g46990 | 46.4233 | 153.1867 | 1.7224  | 1.15E-05 | 0.0009  | SODCC2       |
| LOC_Os01g27230 | 16.9033 | 1.9800   | -3.0937 | 1.16E-05 | 0.00091 | OPR1         |
| LOC_Os01g14850 | 0.0800  | 3.4400   | 5.4263  | 1.23E-05 | 0.00096 | MFS18        |
| LOC_Os10g04540 | 0.0633  | 0.7300   | 3.5269  | 1.24E-05 | 0.00097 | -            |
| LOC_Os01g14630 | 9.0000  | 0.5000   | -4.1699 | 1.25E-05 | 0.00098 | GGPPS1       |
| LOC_Os08g02460 | 6.1733  | 13.1967  | 1.0961  | 1.27E-05 | 0.00099 | -            |
| LOC_Os07g33580 | 0.5333  | 2.2167   | 2.0553  | 1.27E-05 | 0.00099 | CYP716B1     |
| LOC_Os12g16080 | 5.1800  | 16.4733  | 1.6691  | 1.30E-05 | 0.001   | -            |
| LOC_Os11g34920 | 8.1733  | 2.7800   | -1.5558 | 1.31E-05 | 0.00101 | RPM1         |
| LOC_Os01g55540 | 33.2767 | 67.7433  | 1.0256  | 1.32E-05 | 0.00101 | Os01g0760600 |
| LOC_Os08g04240 | 0.0367  | 0.9067   | 4.6280  | 1.32E-05 | 0.00101 | CRRSP55      |
| LOC_Os01g19770 | 0.0433  | 1.8167   | 5.3897  | 1.33E-05 | 0.00102 | OEP162       |
| LOC_Os07g35350 | 0.0300  | 1.1367   | 5.2437  | 1.35E-05 | 0.00103 | At5g56590    |
| LOC_Os09g07180 | 0.3500  | 4.3400   | 3.6323  | 1.36E-05 | 0.00103 | -            |
| LOC_Os03g48780 | 52.1133 | 177.6367 | 1.7692  | 1.37E-05 | 0.00103 | Os03g0694000 |
| LOC_Os01g66760 | 6.7167  | 0.6667   | -3.3327 | 1.39E-05 | 0.00105 | At5g48380    |
| LOC_Os06g47200 | 19.1200 | 46.8033  | 1.2915  | 1.39E-05 | 0.00105 | VAS          |
| LOC_Os01g07110 | 0.1700  | 0.5333   | 1.6495  | 1.40E-05 | 0.00105 | BRCA2B       |
| LOC_Os06g01630 | 12.5400 | 25.9800  | 1.0509  | 1.41E-05 | 0.00105 | At1g54220    |
| LOC_Os02g11760 | 4.4900  | 18.8567  | 2.0703  | 1.44E-05 | 0.00107 | ABCG39       |
| LOC_Os03g03730 | 17.0300 | 7.0533   | -1.2717 | 1.44E-05 | 0.00107 | agtA         |
| LOC_Os01g02800 | 3.0400  | 1.1867   | -1.3572 | 1.44E-05 | 0.00107 | At1g67000    |
| LOC_Os01g43370 | 1.6967  | 4.1900   | 1.3042  | 1.46E-05 | 0.00108 | WRKY19       |
| LOC_Os02g35940 | 3.1467  | 12.6667  | 2.0091  | 1.49E-05 | 0.0011  | TCEA2        |
| LOC_Os02g10290 | 11.3567 | 23.6700  | 1.0595  | 1.50E-05 | 0.00111 | HMA5         |
| LOC_Os03g62070 | 0.0400  | 0.4800   | 3.5850  | 1.55E-05 | 0.00114 | ILL4         |
| LOC_Os05g13770 | 5.5800  | 2.2233   | -1.3275 | 1.56E-05 | 0.00114 | LECRK43      |
| LOC_Os03g50490 | 0.0667  | 1.8467   | 4.7918  | 1.58E-05 | 0.00115 | GLN1-3       |
| LOC_Os02g43820 | 2.6700  | 11.0000  | 2.0426  | 1.59E-05 | 0.00116 | ERF5         |
| LOC_Os03g51760 | 0.0300  | 0.6900   | 4.5236  | 1.60E-05 | 0.00116 | -            |
| LOC_Os10g42030 | 4.5767  | 1.0100   | -2.1799 | 1.67E-05 | 0.00121 | -            |
| LOC_Os02g15930 | 0.2967  | 2.4100   | 3.0221  | 1.70E-05 | 0.00122 | BAG6         |
| LOC_Os03g10320 | 4.2400  | 14.7067  | 1.7943  | 1.72E-05 | 0.00123 | -            |

|                |          |          |          |          |         |              |
|----------------|----------|----------|----------|----------|---------|--------------|
| LOC_Os04g47250 | 0.3500   | 2.5933   | 2.8894   | 1.77E-05 | 0.00127 | CYP86A4      |
| LOC_Os10g02880 | 0.0900   | 2.4167   | 4.7469   | 1.78E-05 | 0.00127 | ZRP4         |
| LOC_Os07g48160 | 6.9667   | 20.0100  | 1.5222   | 1.78E-05 | 0.00127 | AGAL3        |
| LOC_Os05g05040 | 27.9367  | 3.1400   | -3.1533  | 1.83E-05 | 0.0013  | -            |
| LOC_Os08g25870 | 0.1067   | 0.9033   | 3.0821   | 1.84E-05 | 0.00131 | -            |
| LOC_Os09g09650 | 0.7367   | 9.4033   | 3.6741   | 1.86E-05 | 0.00132 | -            |
| LOC_Os03g59030 | 0.0567   | 1.0367   | 4.1933   | 1.88E-05 | 0.00133 | UGT91A1      |
| LOC_Os12g32986 | 14.3400  | 31.8700  | 1.1522   | 1.97E-05 | 0.00138 | -            |
| LOC_Os09g37200 | 0.1633   | 1.2967   | 2.9889   | 1.99E-05 | 0.00139 | ACT-2        |
| LOC_Os11g05550 | 6.2767   | 1.3467   | -2.2206  | 2.01E-05 | 0.00141 | At5g22090    |
| LOC_Os03g27280 | 15.6733  | 32.7800  | 1.0645   | 2.02E-05 | 0.00141 | SAPK1        |
| LOC_Os01g62810 | 0.5200   | 13.7633  | 4.7262   | 2.03E-05 | 0.00142 | UVR8         |
| LOC_Os02g51930 | 5.6967   | 57.6667  | 3.3395   | 2.04E-05 | 0.00142 | UGT85A24     |
| LOC_Os01g67420 | 2.3800   | 5.0600   | 1.0882   | 2.10E-05 | 0.00146 | Daglb        |
| LOC_Os10g26110 | 1.5333   | 0.0200   | -6.2605  | 2.11E-05 | 0.00146 | TYDC5        |
| LOC_Os01g03510 | 7.0933   | 17.4000  | 1.2946   | 2.13E-05 | 0.00147 | -            |
| LOC_Os08g08970 | 0.3500   | 4.2700   | 3.6088   | 2.14E-05 | 0.00147 | GER2         |
| LOC_Os01g14640 | 4.7067   | 1.4833   | -1.6659  | 2.14E-05 | 0.00147 | -            |
| MSTRG.29114    | 0.3733   | 4.9133   | 3.7182   | 2.16E-05 | 0.00148 | --           |
| LOC_Os11g31530 | 1.0600   | 0.0010   | -10.0498 | 2.18E-05 | 0.00149 | SERK1        |
| LOC_Os04g12530 | 2.2233   | 18.0633  | 3.0223   | 2.28E-05 | 0.00155 | -            |
| LOC_Os01g08440 | 5.1500   | 50.4867  | 3.2933   | 2.30E-05 | 0.00156 | UGT75L6      |
| LOC_Os07g31190 | 0.8167   | 0.1033   | -2.9824  | 2.34E-05 | 0.00159 | WAK2         |
| LOC_Os01g72210 | 0.3933   | 1.4367   | 1.8689   | 2.36E-05 | 0.0016  | At3g54510    |
| MSTRG.4664     | 1.1033   | 0.0233   | -5.5633  | 2.37E-05 | 0.0016  | --           |
| LOC_Os03g12510 | 45.8500  | 705.3500 | 3.9433   | 2.38E-05 | 0.0016  | HB2          |
| MSTRG.8902     | 1.9367   | 0.2600   | -2.8970  | 2.41E-05 | 0.00162 | --           |
| LOC_Os12g33130 | 25.1200  | 2.4233   | -3.3738  | 2.42E-05 | 0.00162 | -            |
| LOC_Os10g11500 | 0.0800   | 2.1400   | 4.7415   | 2.43E-05 | 0.00162 | -            |
| LOC_Os06g11980 | 3.9367   | 12.6233  | 1.6810   | 2.44E-05 | 0.00162 | -            |
| LOC_Os12g36940 | 3.7100   | 0.8767   | -2.0813  | 2.44E-05 | 0.00162 | CBP60B       |
| LOC_Os11g37260 | 2.4933   | 6.5500   | 1.3934   | 2.51E-05 | 0.00166 | Os11g0582300 |
| LOC_Os04g31720 | 0.0367   | 1.2733   | 5.1180   | 2.54E-05 | 0.00168 | -            |
| LOC_Os12g12000 | 5.3700   | 1.4500   | -1.8889  | 2.64E-05 | 0.00174 | -            |
| LOC_Os11g35850 | 1.4233   | 0.2267   | -2.6506  | 2.67E-05 | 0.00176 | GSO1         |
| LOC_Os06g51050 | 2.1233   | 32.7833  | 3.9486   | 2.79E-05 | 0.00183 | Cht3         |
| LOC_Os07g06800 | 2.0267   | 23.8367  | 3.5560   | 2.80E-05 | 0.00184 | gpsn2        |
| MSTRG.7333     | 0.3467   | 0.0010   | -8.4374  | 2.82E-05 | 0.00184 | WAK1         |
| LOC_Os11g41650 | 0.3300   | 1.9133   | 2.5356   | 2.85E-05 | 0.00186 | APK3         |
| LOC_Os12g15530 | 0.4567   | 7.6967   | 4.0750   | 2.86E-05 | 0.00186 | LAC25        |
| LOC_Os12g33120 | 830.5367 | 248.0700 | -1.7433  | 2.87E-05 | 0.00186 | -            |
| LOC_Os01g55610 | 0.8000   | 0.1200   | -2.7370  | 2.92E-05 | 0.00189 | NPF1.2       |
| LOC_Os01g09460 | 1.2267   | 7.1400   | 2.5412   | 2.93E-05 | 0.0019  | HXK8         |

|                |         |          |          |          |         |              |
|----------------|---------|----------|----------|----------|---------|--------------|
| LOC_Os08g32850 | 23.4767 | 51.1800  | 1.1244   | 3.08E-05 | 0.00199 | MCCB         |
| LOC_Os05g47780 | 10.1800 | 89.0133  | 3.1283   | 3.12E-05 | 0.00201 | SPAC2F3.16   |
| LOC_Os01g45659 | 0.2100  | 3.7567   | 4.1610   | 3.27E-05 | 0.0021  | -            |
| LOC_Os03g40600 | 0.5267  | 0.0010   | -9.0407  | 3.28E-05 | 0.0021  | CYP78A4      |
| LOC_Os02g49720 | 8.4933  | 44.6500  | 2.3943   | 3.39E-05 | 0.00217 | ALDH2B7      |
| LOC_Os12g07310 | 1.2967  | 11.6167  | 3.1633   | 3.43E-05 | 0.00219 | CBP          |
| LOC_Os03g48770 | 19.1367 | 71.9400  | 1.9105   | 3.48E-05 | 0.00221 | Os03g0693900 |
| LOC_Os08g42010 | 12.6233 | 29.8433  | 1.2413   | 3.53E-05 | 0.00224 | NFD4         |
| LOC_Os11g24510 | 9.0633  | 37.0400  | 2.0310   | 3.53E-05 | 0.00224 | SCPL18       |
| LOC_Os04g31290 | 0.2600  | 6.4867   | 4.6409   | 3.55E-05 | 0.00224 | FIT          |
| LOC_Os04g43200 | 19.3700 | 101.2367 | 2.3858   | 3.60E-05 | 0.00226 | PXG          |
| LOC_Os11g15340 | 3.8667  | 12.3367  | 1.6738   | 3.60E-05 | 0.00226 | AAMT1        |
| LOC_Os01g40499 | 3.3033  | 0.8800   | -1.9083  | 3.61E-05 | 0.00226 | At2g19130    |
| LOC_Os06g19630 | 0.1467  | 1.0333   | 2.8167   | 3.66E-05 | 0.00229 | At3g27390    |
| LOC_Os05g39250 | 7.6667  | 69.7233  | 3.1850   | 3.69E-05 | 0.0023  | MTH_273      |
| LOC_Os04g07110 | 0.9400  | 0.1233   | -2.9301  | 3.73E-05 | 0.00232 | -            |
| LOC_Os08g43334 | 1.0133  | 5.1133   | 2.3352   | 3.74E-05 | 0.00232 | HSFB2B       |
| LOC_Os04g44240 | 0.4100  | 2.1700   | 2.4040   | 3.75E-05 | 0.00233 | UGT73C7      |
| LOC_Os02g09810 | 14.1467 | 56.0133  | 1.9853   | 3.80E-05 | 0.00235 | SLC38A1      |
| LOC_Os03g19190 | 1.4667  | 3.2400   | 1.1435   | 3.85E-05 | 0.00237 | At4g02110    |
| LOC_Os04g24804 | 1.2433  | 10.3733  | 3.0606   | 3.89E-05 | 0.00239 | -            |
| LOC_Os08g40690 | 0.2100  | 9.8600   | 5.5531   | 3.89E-05 | 0.00239 | RIXI         |
| LOC_Os09g25690 | 0.0010  | 1.0967   | 10.0989  | 3.97E-05 | 0.00244 | -            |
| LOC_Os01g19290 | 0.0133  | 0.5800   | 5.4429   | 3.99E-05 | 0.00244 | At1g09380    |
| LOC_Os04g33150 | 0.0567  | 1.0933   | 4.2701   | 4.04E-05 | 0.00247 | -            |
| LOC_Os12g37350 | 68.1367 | 19.9100  | -1.7749  | 4.06E-05 | 0.00248 | LOX2.2       |
| LOC_Os07g42714 | 27.3700 | 9.0800   | -1.5918  | 4.20E-05 | 0.00255 | -            |
| LOC_Os09g39440 | 1.2467  | 4.5267   | 1.8604   | 4.31E-05 | 0.00262 | URH2         |
| LOC_Os09g35940 | 10.8567 | 2.8533   | -1.9279  | 4.37E-05 | 0.00264 | CYP78A6      |
| LOC_Os02g48570 | 20.9400 | 127.6700 | 2.6081   | 4.55E-05 | 0.00275 | NPF7.3       |
| LOC_Os03g13250 | 4.6800  | 9.4967   | 1.0209   | 4.57E-05 | 0.00275 | NPF8.3       |
| LOC_Os11g32759 | 5.5433  | 1.6533   | -1.7454  | 4.65E-05 | 0.0028  | -            |
| LOC_Os05g45350 | 8.5933  | 56.1900  | 2.7090   | 4.66E-05 | 0.0028  | dnaJ         |
| LOC_Os01g72460 | 5.9933  | 22.6800  | 1.9200   | 4.69E-05 | 0.00281 | Os01g0954000 |
| LOC_Os11g14080 | 0.0010  | 0.3033   | 8.2448   | 4.73E-05 | 0.00283 | Hgsnat       |
| LOC_Os01g53170 | 0.8433  | 0.0467   | -4.1756  | 4.75E-05 | 0.00283 | -            |
| LOC_Os05g39310 | 0.0010  | 0.4967   | 8.9561   | 4.86E-05 | 0.00289 | PDC1         |
| LOC_Os03g41060 | 0.0200  | 0.7767   | 5.2792   | 4.87E-05 | 0.00289 | At2g39540    |
| LOC_Os12g11420 | 2.4367  | 0.0010   | -11.2507 | 4.89E-05 | 0.0029  | -            |
| LOC_Os03g43410 | 3.6967  | 1.3967   | -1.4042  | 4.92E-05 | 0.00291 | IAA12        |
| LOC_Os02g18150 | 4.5800  | 1.6600   | -1.4642  | 5.04E-05 | 0.00297 | Os02g0690500 |
| LOC_Os01g33684 | 2.0967  | 4.4300   | 1.0792   | 5.06E-05 | 0.00298 | RGA2         |
| LOC_Os02g38920 | 28.2467 | 148.2000 | 2.3914   | 5.10E-05 | 0.00299 | GAPC3        |

|                |         |          |         |          |         |              |
|----------------|---------|----------|---------|----------|---------|--------------|
| LOC_Os03g42280 | 1.9400  | 0.5100   | -1.9275 | 5.18E-05 | 0.00304 | Os03g0620400 |
| LOC_Os03g01200 | 8.5267  | 3.7100   | -1.2006 | 5.31E-05 | 0.00311 | CHD1L        |
| LOC_Os05g02450 | 2.1867  | 9.1067   | 2.0582  | 5.54E-05 | 0.00324 | -            |
| LOC_Os01g05770 | 0.4733  | 2.9933   | 2.6608  | 5.60E-05 | 0.00326 | -            |
| LOC_Os09g04360 | 1.1467  | 18.6667  | 4.0249  | 5.60E-05 | 0.00326 | -            |
| LOC_Os02g16680 | 8.3067  | 17.4733  | 1.0728  | 5.63E-05 | 0.00326 | BZIP9        |
| LOC_Os03g17230 | 2.1867  | 0.4067   | -2.4268 | 5.63E-05 | 0.00326 | UXS1         |
| LOC_Os01g57580 | 4.3167  | 1.7633   | -1.2916 | 5.74E-05 | 0.00332 | BHLH123      |
| LOC_Os02g28110 | 0.2967  | 3.9800   | 3.7459  | 5.94E-05 | 0.00342 | -            |
| LOC_Os04g48010 | 7.4400  | 17.9800  | 1.2730  | 5.95E-05 | 0.00342 | WDR44        |
| LOC_Os05g15880 | 1.0167  | 20.6833  | 4.3466  | 5.97E-05 | 0.00343 | Chib3H-h     |
| LOC_Os01g17396 | 0.4300  | 15.5900  | 5.1801  | 5.99E-05 | 0.00343 | -            |
| LOC_Os07g23660 | 0.1800  | 1.0267   | 2.5119  | 6.02E-05 | 0.00344 | olpB         |
| LOC_Os01g70590 | 0.0267  | 0.9100   | 5.0928  | 6.10E-05 | 0.00348 | At3g14260    |
| LOC_Os01g41550 | 21.8033 | 8.6400   | -1.3354 | 6.18E-05 | 0.00352 | ASPG1        |
| LOC_Os04g43410 | 5.1667  | 19.8700  | 1.9433  | 6.30E-05 | 0.00357 | BGLU18       |
| LOC_Os01g66740 | 0.2900  | 0.0010   | -8.1799 | 6.30E-05 | 0.00357 | At5g48380    |
| LOC_Os01g66710 | 0.1100  | 2.1533   | 4.2910  | 6.32E-05 | 0.00358 | -            |
| LOC_Os01g62790 | 3.9833  | 1.7133   | -1.2172 | 6.36E-05 | 0.00359 | cid1         |
| LOC_Os11g06460 | 0.2300  | 0.0010   | -7.8455 | 6.37E-05 | 0.00359 | -            |
| LOC_Os05g33644 | 3.2833  | 6.9800   | 1.0881  | 6.45E-05 | 0.00363 | rihA         |
| LOC_Os06g20790 | 0.5333  | 0.0600   | -3.1520 | 6.52E-05 | 0.00366 | AAMT1I       |
| LOC_Os08g25720 | 28.3333 | 59.5033  | 1.0705  | 6.55E-05 | 0.00367 | PFP-ALPHA    |
| LOC_Os06g38340 | 4.4967  | 0.7433   | -2.5968 | 6.59E-05 | 0.00368 | At3g47570    |
| LOC_Os01g38580 | 0.2400  | 3.7067   | 3.9490  | 6.63E-05 | 0.0037  | CCD8A        |
| LOC_Os05g45900 | 1.1867  | 3.8300   | 1.6904  | 6.67E-05 | 0.00371 | IP5P3        |
| LOC_Os02g46680 | 1.9067  | 5.3967   | 1.5010  | 6.70E-05 | 0.00372 | ABCB2        |
| LOC_Os09g09400 | 0.0333  | 0.2400   | 2.8480  | 6.75E-05 | 0.00374 | TY3B-I       |
| LOC_Os08g39730 | 3.2700  | 31.2900  | 3.2583  | 6.84E-05 | 0.00378 | CYP76M5      |
| LOC_Os03g07180 | 1.1633  | 10.1000  | 3.1180  | 6.92E-05 | 0.00381 | -            |
| LOC_Os07g13090 | 0.9500  | 0.0467   | -4.3475 | 6.96E-05 | 0.00383 | -            |
| LOC_Os08g19590 | 21.6500 | 10.6500  | -1.0235 | 7.13E-05 | 0.00391 | ROC4         |
| LOC_Os07g42040 | 0.6333  | 0.0010   | -9.3068 | 7.33E-05 | 0.00402 | -            |
| LOC_Os05g07300 | 25.5600 | 11.0100  | -1.2151 | 7.38E-05 | 0.00403 | At2g19130    |
| LOC_Os03g36270 | 0.0010  | 0.3000   | 8.2288  | 7.41E-05 | 0.00405 | -            |
| LOC_Os05g49730 | 0.7900  | 6.9600   | 3.1392  | 7.56E-05 | 0.0041  | Os05g0572700 |
| LOC_Os12g43140 | 0.1933  | 2.1800   | 3.4952  | 7.56E-05 | 0.0041  | -            |
| LOC_Os05g30350 | 11.2267 | 52.2700  | 2.2191  | 7.57E-05 | 0.0041  | BGLU22       |
| LOC_Os08g05780 | 0.2933  | 3.7633   | 3.6814  | 7.58E-05 | 0.0041  | -            |
| LOC_Os11g10710 | 0.5100  | 2.6333   | 2.3683  | 7.60E-05 | 0.0041  | CRK15        |
| LOC_Os08g32980 | 46.9933 | 143.5467 | 1.6110  | 7.60E-05 | 0.0041  | -            |
| LOC_Os03g15020 | 32.9033 | 78.8633  | 1.2611  | 7.63E-05 | 0.00411 | Os03g0255100 |
| LOC_Os09g22000 | 1.4100  | 4.1800   | 1.5678  | 7.68E-05 | 0.00413 | yidA         |

|                |         |          |         |          |         |              |
|----------------|---------|----------|---------|----------|---------|--------------|
| LOC_Os07g15460 | 62.3567 | 416.0200 | 2.7380  | 7.79E-05 | 0.00418 | NRAMP1       |
| LOC_Os01g03360 | 18.4600 | 99.9133  | 2.4363  | 7.93E-05 | 0.00424 | RBBI3.3      |
| LOC_Os10g26940 | 7.0467  | 56.7500  | 3.0096  | 7.95E-05 | 0.00425 | BURP16       |
| LOC_Os02g36490 | 9.6400  | 28.2967  | 1.5535  | 8.00E-05 | 0.00427 | HEX6         |
| LOC_Os05g10670 | 6.9300  | 28.1800  | 2.0237  | 8.02E-05 | 0.00427 | Os05g0195200 |
| LOC_Os07g42250 | 13.5067 | 31.6033  | 1.2264  | 8.09E-05 | 0.0043  | SSL4         |
| LOC_Os01g55050 | 31.9833 | 11.1900  | -1.5151 | 8.12E-05 | 0.0043  | -            |
| LOC_Os01g15900 | 4.4133  | 27.9500  | 2.6629  | 8.16E-05 | 0.00432 | CDF2         |
| LOC_Os02g18080 | 0.5400  | 0.0667   | -3.0179 | 8.18E-05 | 0.00432 | RGA2         |
| LOC_Os05g13360 | 0.2367  | 3.8567   | 4.0264  | 8.30E-05 | 0.00438 | -            |
| LOC_Os04g39320 | 12.5033 | 1.0367   | -3.5923 | 8.34E-05 | 0.00439 | -            |
| LOC_Os02g07380 | 0.6967  | 0.1333   | -2.3854 | 8.42E-05 | 0.00442 | TY3B-I       |
| LOC_Os05g04770 | 4.7867  | 1.2700   | -1.9142 | 8.50E-05 | 0.00446 | At2g40910    |
| LOC_Os06g44060 | 4.4333  | 1.9233   | -1.2048 | 8.65E-05 | 0.00453 | pldZ         |
| LOC_Os12g18530 | 0.2133  | 1.1267   | 2.4009  | 8.67E-05 | 0.00453 | -            |
| LOC_Os01g22352 | 8.2300  | 20.0900  | 1.2875  | 8.72E-05 | 0.00455 | PER1         |
| LOC_Os01g74490 | 2.2300  | 19.8500  | 3.1540  | 8.76E-05 | 0.00456 | ATX1         |
| LOC_Os01g57700 | 2.4767  | 0.3967   | -2.6424 | 8.81E-05 | 0.00458 | -            |
| LOC_Os01g66010 | 4.2067  | 0.1433   | -4.8752 | 8.86E-05 | 0.00459 | AAP2         |
| LOC_Os10g41660 | 0.4433  | 3.8233   | 3.1084  | 8.91E-05 | 0.00461 | ATL46        |
| LOC_Os07g08240 | 0.0010  | 0.7067   | 9.4649  | 8.96E-05 | 0.00463 | -            |
| LOC_Os04g32320 | 0.0167  | 0.7000   | 5.3923  | 9.09E-05 | 0.00469 | GDPD2        |
| LOC_Os09g10340 | 3.4900  | 0.1833   | -4.2507 | 9.18E-05 | 0.00472 | CYP71D55     |
| LOC_Os09g07230 | 0.0400  | 1.2200   | 4.9307  | 9.24E-05 | 0.00474 | GIP          |
| LOC_Os01g34010 | 0.1933  | 1.1833   | 2.6137  | 9.30E-05 | 0.00476 | -            |
| LOC_Os12g12390 | 8.5633  | 2.2667   | -1.9176 | 9.31E-05 | 0.00476 | -            |
| MSTRG.5861     | 4.0333  | 26.5467  | 2.7185  | 9.42E-05 | 0.00481 | --           |
| LOC_Os05g47790 | 1.3667  | 20.1167  | 3.8797  | 9.43E-05 | 0.00481 | -            |
| LOC_Os11g09370 | 0.9133  | 0.1600   | -2.5131 | 9.53E-05 | 0.00485 | HDA19        |
| LOC_Os04g32960 | 0.0033  | 0.1800   | 5.7549  | 9.62E-05 | 0.00489 | SND1         |
| LOC_Os03g47270 | 16.3600 | 75.2967  | 2.2024  | 9.74E-05 | 0.00494 | -            |
| LOC_Os02g44654 | 0.2033  | 1.4967   | 2.8798  | 9.81E-05 | 0.00496 | CYP86A2      |
| LOC_Os06g14400 | 7.1400  | 18.3400  | 1.3610  | 0.0001   | 0.00505 | At1g03400    |
| LOC_Os02g15740 | 0.0700  | 1.2000   | 4.0995  | 0.000101 | 0.00506 | -            |
| LOC_Os01g40950 | 1.2600  | 6.1967   | 2.2981  | 0.000101 | 0.00506 | -            |
| LOC_Os04g30330 | 0.5333  | 0.0133   | -5.3219 | 0.000102 | 0.00509 | WAKL2        |
| LOC_Os07g02880 | 0.0010  | 0.4633   | 8.8559  | 0.000102 | 0.00509 | -            |
| LOC_Os11g19880 | 0.2767  | 2.1500   | 2.9581  | 0.000102 | 0.00509 | OMT2         |
| LOC_Os03g14560 | 0.0200  | 0.9033   | 5.4972  | 0.000103 | 0.00514 | CYP76C1      |
| LOC_Os09g23820 | 2.0267  | 0.1733   | -3.5475 | 0.000103 | 0.00514 | CYP735A1     |
| LOC_Os12g16520 | 5.9300  | 1.9900   | -1.5753 | 0.000105 | 0.00521 | WAK2         |
| LOC_Os03g06580 | 42.6467 | 101.5300 | 1.2514  | 0.000106 | 0.00526 | notch1       |
| LOC_Os10g40100 | 7.1300  | 2.7333   | -1.3832 | 0.000106 | 0.00526 | PUB33        |



|                |         |          |         |          |         |              |
|----------------|---------|----------|---------|----------|---------|--------------|
| LOC_Os06g46270 | 1.3600  | 3.9700   | 1.5455  | 0.000108 | 0.00534 | NAC021       |
| LOC_Os02g32860 | 1.8800  | 4.5800   | 1.2846  | 0.000108 | 0.00534 | PARP3        |
| LOC_Os03g11380 | 6.2333  | 1.5700   | -1.9892 | 0.000109 | 0.00536 | SNAP33       |
| LOC_Os11g05700 | 11.3300 | 37.7500  | 1.7363  | 0.000111 | 0.00545 | ABCC10       |
| LOC_Os08g08850 | 0.0367  | 1.6100   | 5.4564  | 0.000112 | 0.00549 | FAD4         |
| LOC_Os04g28580 | 0.0010  | 0.2133   | 7.7370  | 0.000112 | 0.0055  | FRS5         |
| LOC_Os03g03980 | 0.5400  | 2.6333   | 2.2859  | 0.000113 | 0.00552 | ccdc124-a    |
| LOC_Os07g18120 | 4.9300  | 11.5400  | 1.2270  | 0.000113 | 0.00552 | AO2          |
| LOC_Os01g68770 | 53.0567 | 212.9433 | 2.0049  | 0.000118 | 0.00574 | SBP1         |
| LOC_Os07g46280 | 6.9667  | 17.4233  | 1.3225  | 0.000118 | 0.00574 | BGLU26       |
| LOC_Os10g09240 | 0.7300  | 7.9567   | 3.4462  | 0.000119 | 0.00576 | -            |
| LOC_Os04g23760 | 0.7767  | 0.2333   | -1.7349 | 0.00012  | 0.00579 | SD25         |
| LOC_Os07g38450 | 0.5867  | 0.1067   | -2.4594 | 0.000123 | 0.00592 | AtMg00310    |
| LOC_Os03g56900 | 18.3100 | 6.0167   | -1.6056 | 0.000125 | 0.00603 | RTNLB8       |
| LOC_Os01g02020 | 22.4333 | 50.4900  | 1.1704  | 0.000125 | 0.00603 | At5g47720    |
| LOC_Os06g43640 | 19.2167 | 48.9367  | 1.3486  | 0.000126 | 0.00605 | ACPEPP       |
| LOC_Os12g10880 | 0.0010  | 0.9000   | 9.8138  | 0.000127 | 0.0061  | -            |
| LOC_Os05g49320 | 20.5533 | 5.8300   | -1.8178 | 0.000129 | 0.00613 | RPL12-2      |
| LOC_Os07g48050 | 0.6467  | 0.0100   | -6.0150 | 0.000129 | 0.00613 | -            |
| LOC_Os02g42150 | 7.0733  | 0.7900   | -3.1625 | 0.000129 | 0.00613 | WAK5         |
| LOC_Os02g07400 | 3.5433  | 0.6833   | -2.3744 | 0.000132 | 0.00626 | -            |
| LOC_Os01g66840 | 3.9867  | 0.2067   | -4.2698 | 0.000132 | 0.00626 | PAE5         |
| LOC_Os09g25770 | 5.5367  | 14.1033  | 1.3489  | 0.000134 | 0.00632 | At4g30420    |
| LOC_Os06g50340 | 10.6100 | 4.3033   | -1.3019 | 0.000135 | 0.00638 | FON1         |
| LOC_Os12g13360 | 0.1467  | 4.9100   | 5.0651  | 0.000136 | 0.00641 | CUL1         |
| MSTRG.19209    | 0.1233  | 2.1667   | 4.1348  | 0.000138 | 0.00648 | --           |
| LOC_Os09g04380 | 0.5800  | 6.7367   | 3.5379  | 0.00014  | 0.00655 | -            |
| LOC_Os06g17070 | 0.1333  | 1.2333   | 3.2095  | 0.00014  | 0.00655 | -            |
| LOC_Os04g25440 | 85.5833 | 212.9600 | 1.3152  | 0.000145 | 0.00676 | UGT85A24     |
| LOC_Os02g15820 | 0.0833  | 0.3967   | 2.2510  | 0.000145 | 0.00678 | XLG1         |
| MSTRG.7507     | 1.7567  | 8.6867   | 2.3060  | 0.000147 | 0.00684 | --           |
| LOC_Os06g35520 | 38.1167 | 160.6933 | 2.0758  | 0.000147 | 0.00685 | -            |
| LOC_Os01g04590 | 4.9400  | 10.9500  | 1.1483  | 0.000149 | 0.00693 | -            |
| LOC_Os01g46720 | 59.3033 | 313.6000 | 2.4027  | 0.000152 | 0.00705 | PAP14        |
| LOC_Os03g49126 | 0.9033  | 2.0767   | 1.2009  | 0.000152 | 0.00705 | -            |
| LOC_Os03g20680 | 1.9967  | 24.0700  | 3.5916  | 0.000153 | 0.00706 | LEA1         |
| LOC_Os05g51670 | 51.3267 | 147.9333 | 1.5272  | 0.000154 | 0.00711 | UGE-1        |
| LOC_Os11g10980 | 3.3433  | 8.8167   | 1.3989  | 0.000155 | 0.00714 | -            |
| LOC_Os03g05370 | 0.0167  | 0.9033   | 5.7602  | 0.00016  | 0.00732 | -            |
| LOC_Os07g34260 | 64.2700 | 1.9533   | -5.0401 | 0.00016  | 0.00733 | Os07g0271500 |
| LOC_Os05g37470 | 9.4800  | 3.7567   | -1.3354 | 0.000161 | 0.00735 | Os05g0447200 |
| LOC_Os01g66890 | 40.5200 | 13.2867  | -1.6087 | 0.000162 | 0.00738 | BT4          |
| LOC_Os04g59440 | 4.2567  | 30.0533  | 2.8197  | 0.000162 | 0.00738 | PSBS         |

|                |          |          |         |          |         |           |
|----------------|----------|----------|---------|----------|---------|-----------|
| LOC_Os06g30830 | 0.4033   | 2.6267   | 2.7032  | 0.000162 | 0.00738 | AGL61     |
| LOC_Os01g11750 | 0.2367   | 0.9967   | 2.0743  | 0.000163 | 0.00741 | At5g45910 |
| LOC_Os09g08570 | 0.0533   | 0.9567   | 4.1649  | 0.000164 | 0.00744 | -         |
| LOC_Os07g32060 | 2.9567   | 0.9500   | -1.6380 | 0.000165 | 0.00749 | RhGT1     |
| LOC_Os06g40150 | 0.0700   | 2.1267   | 4.9251  | 0.000166 | 0.0075  | WIN1      |
| LOC_Os01g52480 | 3.1733   | 0.7067   | -2.1669 | 0.00017  | 0.00769 | -         |
| LOC_Os07g26630 | 0.1433   | 2.4400   | 4.0894  | 0.000172 | 0.00777 | PIP2-4    |
| LOC_Os08g05980 | 1.9667   | 41.4433  | 4.3973  | 0.000173 | 0.00777 | -         |
| LOC_Os09g31482 | 46.9200  | 159.0133 | 1.7609  | 0.000175 | 0.00785 | U2AF35A   |
| LOC_Os04g39380 | 14.4900  | 2.6067   | -2.4748 | 0.000176 | 0.00788 | -         |
| LOC_Os11g41380 | 0.2967   | 0.0100   | -4.8908 | 0.000178 | 0.00795 | FRS5      |
| LOC_Os06g06570 | 2.5867   | 0.6933   | -1.8995 | 0.000178 | 0.00796 | -         |
| LOC_Os06g23684 | 7.7467   | 20.8000  | 1.4249  | 0.000179 | 0.00799 | naat-A    |
| LOC_Os03g62330 | 1.0467   | 3.5000   | 1.7416  | 0.000182 | 0.00812 | -         |
| LOC_Os11g36030 | 3.1833   | 1.1100   | -1.5200 | 0.000185 | 0.0082  | CDCA7L    |
| LOC_Os01g25360 | 1.4333   | 0.2833   | -2.3388 | 0.000185 | 0.0082  | MES7      |
| LOC_Os12g37260 | 152.2767 | 43.4100  | -1.8106 | 0.000185 | 0.0082  | LOX2.1    |
| LOC_Os04g15650 | 4.8067   | 0.6733   | -2.8356 | 0.000185 | 0.0082  | At3g47570 |
| LOC_Os04g52640 | 28.9000  | 10.3800  | -1.4773 | 0.000187 | 0.00825 | At1g56130 |
| LOC_Os02g40900 | 6.5800   | 18.2767  | 1.4738  | 0.000188 | 0.00828 | RBM42     |
| LOC_Os03g45779 | 19.5900  | 6.3133   | -1.6336 | 0.000189 | 0.00829 | -         |
| LOC_Os04g34270 | 33.4933  | 3.2033   | -3.3862 | 0.000189 | 0.00829 | At2g19130 |
| LOC_Os06g32990 | 2.4633   | 0.2833   | -3.1200 | 0.000193 | 0.00845 | PER36     |
| LOC_Os06g05020 | 0.2533   | 10.1767  | 5.3281  | 0.000197 | 0.00861 | -         |
| LOC_Os03g45450 | 10.1867  | 1.8667   | -2.4481 | 0.000198 | 0.00867 | WRKY71    |
| LOC_Os08g36570 | 1.5733   | 0.3367   | -2.2244 | 0.000199 | 0.00867 | At1g10780 |
| LOC_Os04g54300 | 7.9900   | 54.7300  | 2.7761  | 0.000201 | 0.00875 | -         |
| MSTRG.26590    | 0.4300   | 3.3733   | 2.9718  | 0.000202 | 0.00877 | --        |
| LOC_Os03g60850 | 13.4333  | 5.2133   | -1.3655 | 0.000204 | 0.00884 | NPF5.7    |
| LOC_Os07g14700 | 10.9600  | 4.4100   | -1.3134 | 0.000204 | 0.00884 | -         |
| LOC_Os08g42040 | 36.8900  | 84.3967  | 1.1940  | 0.000206 | 0.00889 | LTPG1     |
| LOC_Os09g02270 | 2.0000   | 6.6667   | 1.7370  | 0.000206 | 0.00889 | kynB      |
| LOC_Os09g15170 | 4.1333   | 1.5367   | -1.4275 | 0.000206 | 0.00889 | NAT2      |
| LOC_Os01g62610 | 0.5867   | 4.3467   | 2.8893  | 0.000211 | 0.00908 | FKBP20-1  |
| LOC_Os03g20910 | 0.0010   | 0.2267   | 7.8244  | 0.000212 | 0.00911 | WOX6      |
| LOC_Os11g37630 | 0.0067   | 0.2933   | 5.4594  | 0.000212 | 0.00911 | TBL19     |
| LOC_Os04g59540 | 0.2967   | 2.6367   | 3.1518  | 0.000213 | 0.00912 | FAB1B     |
| LOC_Os02g32690 | 0.0467   | 0.7667   | 4.0381  | 0.000214 | 0.00914 | ABCG41    |
| LOC_Os03g09250 | 8.8167   | 44.7833  | 2.3447  | 0.000214 | 0.00916 | INO1      |
| LOC_Os05g07710 | 0.5733   | 1.6800   | 1.5510  | 0.000216 | 0.00923 | ATG18D    |
| LOC_Os07g29940 | 0.7233   | 0.0867   | -3.0611 | 0.000217 | 0.00923 | -         |
| LOC_Os07g43604 | 0.2633   | 1.8333   | 2.7995  | 0.000218 | 0.00924 | -         |
| LOC_Os06g13560 | 3.9100   | 8.9833   | 1.2001  | 0.000218 | 0.00924 | AAMT2     |

|                |         |          |         |          |                      |
|----------------|---------|----------|---------|----------|----------------------|
| LOC_Os01g56180 | 7.3467  | 30.7833  | 2.0670  | 0.000219 | 0.00927 -            |
| LOC_Os09g09410 | 0.2700  | 1.9867   | 2.8793  | 0.00022  | 0.00928 -            |
| LOC_Os01g03720 | 0.2867  | 2.2567   | 2.9767  | 0.00022  | 0.00928 MYB108       |
| LOC_Os11g07911 | 1.7667  | 24.1633  | 3.7737  | 0.000231 | 0.0097 -             |
| LOC_Os01g37200 | 0.1000  | 3.0267   | 4.9197  | 0.000232 | 0.00973 -            |
| LOC_Os01g48640 | 5.3167  | 1.2267   | -2.1158 | 0.000233 | 0.00977 -            |
| LOC_Os09g11640 | 0.0010  | 0.0933   | 6.5443  | 0.000234 | 0.00977 -            |
| LOC_Os08g26840 | 48.8733 | 6.7700   | -2.8518 | 0.000234 | 0.00977 -            |
| LOC_Os07g07930 | 9.8633  | 27.2800  | 1.4677  | 0.000245 | 0.01019 At2g13820    |
| LOC_Os01g06790 | 2.5900  | 0.8267   | -1.6476 | 0.000248 | 0.01027 RLP12        |
| LOC_Os03g43750 | 0.3467  | 2.4000   | 2.7914  | 0.000248 | 0.01027 -            |
| LOC_Os11g46950 | 1.0933  | 0.2767   | -1.9825 | 0.000248 | 0.01027 WAK2         |
| LOC_Os03g08624 | 5.9433  | 42.3600  | 2.8334  | 0.000248 | 0.01027 Rv1106c      |
| LOC_Os11g04030 | 0.0200  | 0.5867   | 4.8745  | 0.000249 | 0.01028 ZIFL1        |
| LOC_Os11g43760 | 0.0067  | 0.2867   | 5.4263  | 0.00025  | 0.01032 DAGLA        |
| LOC_Os06g29220 | 0.0833  | 2.2867   | 4.7782  | 0.000251 | 0.01032 Os06g0486900 |
| MSTRG.13841    | 1.2833  | 0.1667   | -2.9449 | 0.000252 | 0.01035 --           |
| LOC_Os09g32560 | 17.6300 | 7.9767   | -1.1442 | 0.000252 | 0.01035 Os08g0520100 |
| LOC_Os05g30660 | 0.1933  | 1.0633   | 2.4594  | 0.000257 | 0.01051 EXO70B1      |
| LOC_Os11g32210 | 0.0100  | 0.2300   | 4.5236  | 0.000261 | 0.01064 -            |
| LOC_Os05g38219 | 4.2000  | 1.8900   | -1.1520 | 0.000261 | 0.01066 -            |
| LOC_Os01g47290 | 0.1267  | 3.6967   | 4.8671  | 0.000262 | 0.01067 -            |
| LOC_Os11g32890 | 0.3300  | 7.2000   | 4.4475  | 0.000263 | 0.01069 -            |
| LOC_Os02g07260 | 41.0033 | 96.7400  | 1.2384  | 0.000265 | 0.01074 -            |
| LOC_Os11g39020 | 42.0567 | 175.2200 | 2.0588  | 0.000265 | 0.01074 ABCF5        |
| LOC_Os10g32810 | 1.1800  | 12.5800  | 3.4143  | 0.000267 | 0.01079 BAM1         |
| LOC_Os07g37310 | 14.7233 | 32.2967  | 1.1333  | 0.00027  | 0.01088 -            |
| LOC_Os02g57840 | 0.4800  | 1.9000   | 1.9849  | 0.000271 | 0.01091 -            |
| MSTRG.27288    | 4.2767  | 0.9400   | -2.1858 | 0.000272 | 0.01091 --           |
| LOC_Os01g13480 | 14.3133 | 49.1233  | 1.7790  | 0.000272 | 0.01091 Grxcr1       |
| MSTRG.3380     | 3.4300  | 1.3733   | -1.3205 | 0.000272 | 0.01093 --           |
| LOC_Os12g02210 | 4.0800  | 12.4567  | 1.6103  | 0.000275 | 0.01102 ATL44        |
| LOC_Os07g05740 | 0.3767  | 1.0167   | 1.4325  | 0.000277 | 0.01107 At1g17230    |
| LOC_Os04g01130 | 1.4600  | 0.2967   | -2.2991 | 0.00028  | 0.0112 MRG1          |
| LOC_Os09g39930 | 1.7033  | 4.1733   | 1.2928  | 0.000281 | 0.01121 PBS1         |
| LOC_Os06g38450 | 34.8267 | 7.9200   | -2.1366 | 0.000282 | 0.01123 SAG39        |
| LOC_Os01g49280 | 0.3200  | 1.7733   | 2.4703  | 0.000284 | 0.01129 -            |
| LOC_Os11g07230 | 11.0633 | 4.7733   | -1.2127 | 0.000291 | 0.01153 At3g47570    |
| LOC_Os02g57160 | 7.2367  | 40.4967  | 2.4844  | 0.000291 | 0.01153 At1g79600    |
| LOC_Os02g08490 | 1.1367  | 4.5700   | 2.0074  | 0.000291 | 0.01153 CLPB3        |
| LOC_Os01g15100 | 1.6300  | 0.0333   | -5.6118 | 0.000296 | 0.0117 -             |
| LOC_Os02g51900 | 5.3733  | 1.8600   | -1.5305 | 0.000298 | 0.01174 UGT85A24     |
| MSTRG.3054     | 0.8500  | 2.5233   | 1.5698  | 0.000301 | 0.01184 TULP9        |

|                |           |          |         |          |         |              |
|----------------|-----------|----------|---------|----------|---------|--------------|
| LOC_Os07g46520 | 4.6667    | 28.6067  | 2.6159  | 0.000302 | 0.01189 | HDHD3        |
| LOC_Os11g44560 | 2.5067    | 0.4867   | -2.3648 | 0.000304 | 0.01194 | CCR4         |
| LOC_Os01g05780 | 0.2033    | 2.6000   | 3.6766  | 0.000304 | 0.01194 | PAS2A        |
| LOC_Os10g22520 | 15.3000   | 42.8000  | 1.4841  | 0.000308 | 0.01206 | exgA         |
| LOC_Os02g14160 | 2.4433    | 10.0900  | 2.0460  | 0.00031  | 0.01212 | PER52        |
| LOC_Os05g51470 | 9.8933    | 32.9933  | 1.7376  | 0.00031  | 0.01212 | PCO2         |
| LOC_Os01g02830 | 5.6300    | 2.6533   | -1.0853 | 0.000311 | 0.01214 | At1g67000    |
| LOC_Os10g11910 | 0.0010    | 0.2367   | 7.8867  | 0.000313 | 0.01218 | -            |
| LOC_Os08g04210 | 0.0010    | 0.2133   | 7.7370  | 0.000318 | 0.01236 | CRRSP55      |
| LOC_Os01g39020 | 1.1467    | 5.9467   | 2.3746  | 0.00032  | 0.01241 | HSFA6B       |
| LOC_Os03g42520 | 0.1467    | 1.7800   | 3.6013  | 0.000321 | 0.01242 | -            |
| MSTRG.18204    | 0.3533    | 1.2567   | 1.8305  | 0.000321 | 0.01243 | --           |
| LOC_Os01g10400 | 2944.9033 | 646.9400 | -2.1865 | 0.000324 | 0.01249 | -            |
| LOC_Os06g08710 | 1.0900    | 0.2100   | -2.3759 | 0.000324 | 0.01249 | EFR          |
| LOC_Os03g52380 | 2.0200    | 11.0500  | 2.4516  | 0.000328 | 0.01261 | -            |
| LOC_Os04g39560 | 5.7467    | 20.3733  | 1.8259  | 0.000328 | 0.01262 | -            |
| LOC_Os08g10250 | 48.4300   | 12.1667  | -1.9930 | 0.000337 | 0.01291 | At1g56140    |
| LOC_Os07g46420 | 1.5200    | 5.7500   | 1.9195  | 0.000338 | 0.01296 | -            |
| LOC_Os02g36880 | 4.5667    | 16.0200  | 1.8107  | 0.000339 | 0.01298 | NAC100       |
| LOC_Os12g02420 | 4.0933    | 8.8100   | 1.1059  | 0.000341 | 0.01302 | WRKY55       |
| LOC_Os01g70500 | 0.9467    | 2.4933   | 1.3971  | 0.000341 | 0.01302 | -            |
| LOC_Os06g22925 | 2.8567    | 10.7800  | 1.9160  | 0.000344 | 0.01309 | -            |
| LOC_Os10g23240 | 1.7867    | 29.2400  | 4.0326  | 0.000345 | 0.0131  | -            |
| LOC_Os11g33970 | 4.8067    | 1.6667   | -1.5281 | 0.000345 | 0.0131  | At3g47200    |
| LOC_Os01g68370 | 0.0010    | 0.1100   | 6.7814  | 0.000347 | 0.01315 | VP1          |
| LOC_Os10g36180 | 1.6500    | 24.1300  | 3.8703  | 0.000349 | 0.01323 | LTI65        |
| LOC_Os02g34250 | 0.1733    | 2.5633   | 3.8864  | 0.000353 | 0.01336 | -            |
| LOC_Os06g36680 | 0.2267    | 0.0133   | -4.0875 | 0.000356 | 0.01346 | ATH1         |
| LOC_Os01g73604 | 0.8567    | 0.1033   | -3.0514 | 0.000359 | 0.01356 | snrpd2       |
| LOC_Os03g04920 | 12.9100   | 29.1500  | 1.1750  | 0.000362 | 0.01365 | ABCC13       |
| LOC_Os07g43390 | 5.5267    | 13.0033  | 1.2344  | 0.000363 | 0.01366 | DPE1         |
| LOC_Os04g32620 | 2.6800    | 9.8900   | 1.8837  | 0.000364 | 0.01366 | ERF113       |
| LOC_Os08g39330 | 0.4167    | 4.3367   | 3.3796  | 0.000365 | 0.01369 | -            |
| LOC_Os10g40040 | 0.2600    | 2.5333   | 3.2845  | 0.000372 | 0.0139  | -            |
| LOC_Os01g70850 | 3.5000    | 27.0200  | 2.9486  | 0.000375 | 0.01398 | PIR7B        |
| LOC_Os05g47540 | 161.3100  | 24.0633  | -2.7449 | 0.000382 | 0.0142  | NMT1         |
| LOC_Os01g06660 | 3.2967    | 12.2600  | 1.8949  | 0.000382 | 0.0142  | PDC1         |
| LOC_Os03g53740 | 17.1133   | 6.9300   | -1.3042 | 0.000383 | 0.0142  | -            |
| LOC_Os04g55240 | 0.5433    | 3.0300   | 2.4794  | 0.000383 | 0.0142  | VQ11         |
| LOC_Os11g01869 | 2.7433    | 5.7133   | 1.0584  | 0.000384 | 0.0142  | DRB7         |
| LOC_Os08g04810 | 2.2267    | 4.4633   | 1.0032  | 0.00039  | 0.01443 | -            |
| LOC_Os06g36560 | 2.8167    | 38.4767  | 3.7719  | 0.000392 | 0.01449 | Os06g0561000 |
| LOC_Os04g35210 | 2.7267    | 0.7500   | -1.8622 | 0.000395 | 0.01458 | -            |

|                |         |          |         |          |         |              |
|----------------|---------|----------|---------|----------|---------|--------------|
| LOC_Os06g46436 | 68.6133 | 31.9500  | -1.1027 | 0.000398 | 0.01464 | psaC         |
| LOC_Os09g33680 | 20.4300 | 68.8333  | 1.7524  | 0.000398 | 0.01464 | BGLU31       |
| LOC_Os07g04930 | 21.2833 | 126.2267 | 2.5682  | 0.000399 | 0.01466 | Prx          |
| LOC_Os07g22498 | 66.9133 | 30.9633  | -1.1117 | 0.000406 | 0.01488 | psaC         |
| LOC_Os07g34520 | 3.8867  | 49.5867  | 3.6733  | 0.000408 | 0.01493 | ICL          |
| LOC_Os07g47100 | 11.7567 | 26.2400  | 1.1583  | 0.00041  | 0.015   | NHX2         |
| LOC_Os03g19700 | 2.4400  | 0.5767   | -2.0811 | 0.000414 | 0.01512 | At3g47200    |
| LOC_Os03g55034 | 0.0800  | 1.1100   | 3.7944  | 0.000415 | 0.01513 | -            |
| LOC_Os03g12660 | 13.0133 | 2.9200   | -2.1560 | 0.000417 | 0.01519 | CYP90B1      |
| LOC_Os04g28020 | 3.7567  | 1.5100   | -1.3149 | 0.000418 | 0.01521 | PRD1         |
| LOC_Os10g37290 | 7.6767  | 2.6267   | -1.5472 | 0.000424 | 0.01542 | -            |
| LOC_Os10g21406 | 40.2600 | 18.3533  | -1.1333 | 0.000433 | 0.01572 | psaC         |
| LOC_Os04g58380 | 4.6467  | 2.0300   | -1.1947 | 0.000435 | 0.01575 | -            |
| LOC_Os05g02040 | 0.5033  | 1.0833   | 1.1059  | 0.000435 | 0.01575 | RPA1C        |
| LOC_Os06g48720 | 0.4033  | 1.1167   | 1.4692  | 0.000438 | 0.01582 | HMA3         |
| LOC_Os10g38020 | 0.0010  | 0.1667   | 7.3808  | 0.000439 | 0.01586 | -            |
| LOC_Os02g44680 | 2.3067  | 0.5267   | -2.1308 | 0.000442 | 0.01595 | NCS1         |
| LOC_Os02g53410 | 3.0833  | 9.7900   | 1.6668  | 0.000452 | 0.01625 | -            |
| LOC_Os02g07930 | 3.1967  | 13.7233  | 2.1020  | 0.000456 | 0.01635 | BBX32        |
| LOC_Os01g28970 | 0.3367  | 9.2133   | 4.7743  | 0.000458 | 0.01642 | -            |
| LOC_Os01g36710 | 0.4333  | 0.0700   | -2.6301 | 0.000459 | 0.01643 | -            |
| LOC_Os04g32030 | 5.9333  | 19.4933  | 1.7161  | 0.00046  | 0.01643 | HIPP26       |
| LOC_Os08g20200 | 0.3733  | 1.6833   | 2.1728  | 0.000474 | 0.01691 | FAR1         |
| LOC_Os09g03200 | 0.3633  | 3.1933   | 3.1357  | 0.000475 | 0.01691 | -            |
| LOC_Os02g55070 | 0.1500  | 0.0010   | -7.2288 | 0.000476 | 0.01691 | -            |
| LOC_Os09g08130 | 23.4600 | 2.4833   | -3.2399 | 0.000482 | 0.0171  | At2g04400    |
| LOC_Os05g50930 | 3.3867  | 33.6767  | 3.3138  | 0.000483 | 0.01714 | SIGE         |
| LOC_Os01g06640 | 2.8867  | 8.7300   | 1.5966  | 0.000486 | 0.01722 | BHLH51       |
| LOC_Os03g57400 | 0.9800  | 0.1767   | -2.4718 | 0.000487 | 0.01723 | EPB2         |
| LOC_Os04g27020 | 0.2033  | 0.0010   | -7.6677 | 0.000492 | 0.01739 | CYP71Z7      |
| LOC_Os03g20440 | 3.0767  | 0.3933   | -2.9675 | 0.000495 | 0.01746 | CAMB25       |
| LOC_Os11g15570 | 23.2400 | 4.3567   | -2.4153 | 0.000496 | 0.01748 | At1g18480    |
| LOC_Os01g66240 | 4.1233  | 11.1933  | 1.4408  | 0.000504 | 0.01772 | SPAC22H12.03 |
| LOC_Os02g54560 | 0.0010  | 0.2900   | 8.1799  | 0.000512 | 0.01798 | -            |
| LOC_Os12g17570 | 0.1967  | 1.2500   | 2.6681  | 0.000514 | 0.01803 | At1g33811    |
| LOC_Os12g29820 | 0.7733  | 0.1667   | -2.2141 | 0.000516 | 0.01808 | -            |
| LOC_Os01g10440 | 6.8300  | 1.9000   | -1.8459 | 0.00052  | 0.01819 | oxt          |
| LOC_Os11g05390 | 0.2133  | 4.0467   | 4.2456  | 0.000522 | 0.01825 | tetA         |
| LOC_Os05g27790 | 9.0967  | 23.6267  | 1.3770  | 0.000525 | 0.01833 | Os05g0344400 |
| LOC_Os11g37880 | 0.1267  | 0.8200   | 2.6946  | 0.000526 | 0.01835 | RPP13        |
| MSTRG.17405    | 0.6633  | 4.7700   | 2.8462  | 0.000528 | 0.01839 | --           |
| LOC_Os03g25790 | 2.7833  | 12.6533  | 2.1846  | 0.000529 | 0.01839 | At3g13560    |
| LOC_Os06g19260 | 3.1000  | 0.8600   | -1.8499 | 0.000531 | 0.01846 | -            |

|                |         |         |         |          |         |              |
|----------------|---------|---------|---------|----------|---------|--------------|
| LOC_Os02g21090 | 2.2033  | 0.7600  | -1.5356 | 0.000538 | 0.01863 | BHLH144      |
| MSTRG.5222     | 14.5600 | 30.9433 | 1.0876  | 0.000538 | 0.01863 | ecdK         |
| LOC_Os07g47550 | 0.0100  | 0.3267  | 5.0297  | 0.000539 | 0.01864 | UGT94E5      |
| LOC_Os03g12500 | 6.2100  | 0.4267  | -3.8634 | 0.000544 | 0.01876 | CYP74A2      |
| LOC_Os10g30832 | 2.1900  | 0.2967  | -2.8840 | 0.000545 | 0.01876 | -            |
| LOC_Os01g05760 | 0.3467  | 3.6667  | 3.4028  | 0.000546 | 0.01876 | PAS2A        |
| LOC_Os01g71830 | 0.4833  | 3.4700  | 2.8438  | 0.000546 | 0.01876 | -            |
| LOC_Os12g32620 | 0.3100  | 1.9167  | 2.6283  | 0.000546 | 0.01876 | WLIM1        |
| LOC_Os04g37570 | 0.6567  | 4.0933  | 2.6400  | 0.000552 | 0.01894 | nep2         |
| LOC_Os01g27480 | 5.6033  | 0.9300  | -2.5910 | 0.000553 | 0.01897 | GSTF1        |
| LOC_Os10g37120 | 1.1800  | 0.0667  | -4.1457 | 0.000556 | 0.01904 | CYP89A2      |
| LOC_Os04g26320 | 2.9000  | 0.7867  | -1.8822 | 0.000559 | 0.01911 | JAL3         |
| LOC_Os03g48310 | 2.6067  | 7.0233  | 1.4299  | 0.000563 | 0.01921 | LHA1         |
| LOC_Os04g38790 | 16.7167 | 3.4800  | -2.2641 | 0.000566 | 0.01928 | -            |
| LOC_Os01g04370 | 0.5633  | 2.6000  | 2.2065  | 0.000571 | 0.0194  | HSP16.9A     |
| LOC_Os12g10870 | 0.1200  | 0.9767  | 3.0248  | 0.000571 | 0.0194  | RLP12        |
| LOC_Os01g16060 | 1.4100  | 0.4667  | -1.5952 | 0.000574 | 0.01947 | -            |
| LOC_Os01g11160 | 23.9033 | 3.4300  | -2.8009 | 0.00058  | 0.01963 | CAT5         |
| LOC_Os05g18670 | 1.4333  | 0.3067  | -2.2246 | 0.000581 | 0.01965 | SLAH1        |
| LOC_Os07g36570 | 13.1667 | 1.5433  | -3.0928 | 0.000582 | 0.01965 | B120         |
| LOC_Os12g37519 | 5.1867  | 36.0433 | 2.7969  | 0.00059  | 0.01988 | -            |
| MSTRG.8541     | 1.0867  | 3.9433  | 1.8595  | 0.000592 | 0.01995 | --           |
| LOC_Os08g07680 | 4.3267  | 1.3700  | -1.6591 | 0.000595 | 0.02001 | -            |
| LOC_Os02g58170 | 1.4300  | 3.9500  | 1.4658  | 0.000596 | 0.02001 | Os03g0733400 |
| LOC_Os05g18446 | 0.9467  | 3.4133  | 1.8503  | 0.000596 | 0.02001 | -            |
| LOC_Os10g40570 | 19.4167 | 45.3933 | 1.2252  | 0.000601 | 0.02014 | At1g63370    |
| LOC_Os03g17810 | 0.1533  | 1.0900  | 2.8296  | 0.000604 | 0.02022 | LBD1         |
| LOC_Os08g42470 | 0.0233  | 0.5300  | 4.5055  | 0.000611 | 0.02045 | BHLH137      |
| LOC_Os03g45250 | 0.1633  | 1.6100  | 3.3012  | 0.000615 | 0.02055 | PCO2         |
| LOC_Os03g05440 | 0.2400  | 1.5800  | 2.7188  | 0.000629 | 0.02098 | Os03g0148000 |
| LOC_Os04g49350 | 7.5533  | 48.8500 | 2.6932  | 0.00063  | 0.021   | At5g13770    |
| MSTRG.26335    | 1.2700  | 9.5100  | 2.9046  | 0.000635 | 0.02114 | --           |
| LOC_Os03g61270 | 0.8467  | 6.9633  | 3.0399  | 0.000646 | 0.02149 | MAN3         |
| LOC_Os07g46540 | 0.1600  | 0.5667  | 1.8244  | 0.000651 | 0.02159 | NCAPD2       |
| LOC_Os04g53210 | 3.1400  | 18.0833 | 2.5258  | 0.000655 | 0.0217  | GLO3         |
| LOC_Os03g19000 | 0.1333  | 0.7267  | 2.4463  | 0.000658 | 0.02176 | PEX11-2      |
| LOC_Os04g32390 | 0.5267  | 0.0010  | -9.0407 | 0.00066  | 0.0218  | -            |
| LOC_Os02g51119 | 3.9900  | 1.1100  | -1.8458 | 0.000663 | 0.02187 | -            |
| LOC_Os02g32660 | 0.6300  | 1.5267  | 1.2770  | 0.000665 | 0.02191 | SBE1         |
| LOC_Os02g43330 | 2.2833  | 27.9333 | 3.6128  | 0.000666 | 0.02191 | HOX24        |
| LOC_Os03g63810 | 0.5700  | 1.8400  | 1.6907  | 0.000668 | 0.02196 | WRKY35       |
| LOC_Os07g43240 | 0.1700  | 1.8033  | 3.4071  | 0.000669 | 0.02199 | ASK9         |
| LOC_Os03g01160 | 3.8767  | 1.1200  | -1.7913 | 0.000679 | 0.02224 | PUB52        |

|                |          |          |         |          |         |              |
|----------------|----------|----------|---------|----------|---------|--------------|
| LOC_Os07g44410 | 36.8633  | 190.0167 | 2.3659  | 0.000686 | 0.02242 | tolB         |
| LOC_Os06g44260 | 0.5567   | 2.4733   | 2.1516  | 0.000692 | 0.0226  | Os06g0652400 |
| LOC_Os04g04390 | 0.2267   | 0.0567   | -2.0000 | 0.000694 | 0.02264 | RPA1C        |
| LOC_Os01g32120 | 1.2067   | 3.6800   | 1.6087  | 0.000698 | 0.02275 | CML11        |
| LOC_Os07g24230 | 0.2000   | 1.9400   | 3.2780  | 0.000699 | 0.02275 | At2g33280    |
| LOC_Os01g16370 | 0.0767   | 0.3733   | 2.2838  | 0.000706 | 0.02292 | RPM1         |
| LOC_Os10g39044 | 1.5633   | 0.0433   | -5.1730 | 0.000707 | 0.02292 | -            |
| LOC_Os07g36465 | 16.6567  | 34.2100  | 1.0383  | 0.000709 | 0.02295 | Os07g0549700 |
| LOC_Os11g12310 | 1.1933   | 0.1633   | -2.8691 | 0.00071  | 0.02295 | TY3B-I       |
| LOC_Os05g31140 | 169.4933 | 674.7000 | 1.9930  | 0.00071  | 0.02295 | -            |
| LOC_Os06g51260 | 3.0500   | 30.1433  | 3.3050  | 0.00072  | 0.0232  | RVE2         |
| LOC_Os12g03594 | 2.2567   | 0.7967   | -1.5021 | 0.00072  | 0.0232  | PP2B10       |
| LOC_Os07g09190 | 10.0467  | 1.5067   | -2.7373 | 0.000721 | 0.0232  | Os07g0190000 |
| LOC_Os07g02810 | 0.5033   | 2.1900   | 2.1213  | 0.000723 | 0.02322 | -            |
| LOC_Os03g44150 | 9.4033   | 28.1900  | 1.5839  | 0.000728 | 0.02335 | OAT          |
| LOC_Os11g31090 | 2.2500   | 8.2633   | 1.8768  | 0.000729 | 0.02335 | HHT1         |
| LOC_Os09g29600 | 3.4467   | 1.3400   | -1.3630 | 0.00073  | 0.02335 | WAK2         |
| LOC_Os05g25650 | 6.7933   | 16.3033  | 1.2630  | 0.000732 | 0.02335 | -            |
| LOC_Os06g36310 | 2.4767   | 0.9133   | -1.4392 | 0.000732 | 0.02335 | RLK5         |
| LOC_Os05g37830 | 1.7500   | 8.0033   | 2.1932  | 0.000733 | 0.02335 | -            |
| LOC_Os12g29950 | 14.5400  | 4.9667   | -1.5497 | 0.000733 | 0.02335 | YMR155W      |
| LOC_Os05g25950 | 6.9200   | 2.8700   | -1.2697 | 0.00074  | 0.02353 | CYCU4-2      |
| LOC_Os12g07610 | 1.4733   | 0.1367   | -3.4304 | 0.000743 | 0.0236  | MYB98        |
| LOC_Os04g12499 | 4.6067   | 18.4433  | 2.0013  | 0.000748 | 0.02373 | ANT1         |
| LOC_Os12g33150 | 301.9933 | 70.2400  | -2.1042 | 0.000762 | 0.02413 | -            |
| LOC_Os09g14490 | 4.2133   | 1.3600   | -1.6314 | 0.000764 | 0.02418 | RGA2         |
| MSTRG.4488     | 10.6700  | 4.7733   | -1.1605 | 0.000767 | 0.02424 | --           |
| LOC_Os01g57964 | 6.0533   | 2.8500   | -1.0868 | 0.000771 | 0.02433 | psaA         |
| LOC_Os08g39210 | 1.2133   | 0.4733   | -1.3580 | 0.000772 | 0.02434 | WAK3         |
| LOC_Os05g36290 | 21.6400  | 53.4600  | 1.3048  | 0.000773 | 0.02434 | ACT1         |
| LOC_Os07g33440 | 0.1267   | 0.8267   | 2.7063  | 0.000779 | 0.02452 | -            |
| LOC_Os03g02874 | 1.4700   | 15.5000  | 3.3984  | 0.000785 | 0.02467 | -            |
| LOC_Os01g53090 | 1.4300   | 4.8700   | 1.7679  | 0.00079  | 0.02477 | -            |
| LOC_Os03g40040 | 1.4567   | 0.3833   | -1.9260 | 0.000791 | 0.02479 | -            |
| LOC_Os07g22494 | 18.0600  | 7.6267   | -1.2437 | 0.000792 | 0.02479 | -            |
| LOC_Os05g30980 | 7.7067   | 16.2133  | 1.0730  | 0.000802 | 0.02503 | BRN1         |
| LOC_Os07g48830 | 45.4100  | 122.4833 | 1.4315  | 0.000813 | 0.02536 | GOLS2        |
| LOC_Os01g45460 | 0.5400   | 2.6633   | 2.3022  | 0.000814 | 0.02537 | IMCEL2       |
| LOC_Os10g38610 | 1.4667   | 6.6767   | 2.1866  | 0.000819 | 0.02547 | GSTU6        |
| LOC_Os06g26234 | 15.0133  | 5.1033   | -1.5567 | 0.00082  | 0.02549 | SBE3         |
| LOC_Os10g20794 | 6.3567   | 19.7167  | 1.6331  | 0.000825 | 0.0256  | -            |
| LOC_Os01g26280 | 5.6467   | 1.4000   | -2.0120 | 0.000827 | 0.02565 | WAK5         |
| LOC_Os02g28340 | 3.1700   | 8.4800   | 1.4196  | 0.000831 | 0.02565 | 3AT1         |

|                |          |         |         |          |         |                   |
|----------------|----------|---------|---------|----------|---------|-------------------|
| LOC_Os01g57004 | 2.5667   | 7.1133  | 1.4706  | 0.000832 | 0.02565 | -                 |
| LOC_Os05g37140 | 17.7967  | 53.5467 | 1.5892  | 0.000833 | 0.02565 | FDX6              |
| LOC_Os04g53120 | 3.1067   | 0.7433  | -2.0633 | 0.000833 | 0.02565 | RGA2              |
| LOC_Os10g11930 | 0.0010   | 0.1667  | 7.3808  | 0.000833 | 0.02565 | -                 |
| LOC_Os11g28540 | 0.3133   | 0.0010  | -8.2916 | 0.000833 | 0.02565 | -                 |
| LOC_Os06g12310 | 51.5800  | 13.9333 | -1.8883 | 0.000834 | 0.02565 | NIP2-2            |
| LOC_Os09g10010 | 1.7800   | 12.3867 | 2.7988  | 0.000843 | 0.02585 | -                 |
| LOC_Os07g26110 | 2.2500   | 13.6300 | 2.5988  | 0.000843 | 0.02585 | Os07g0442900      |
| LOC_Os02g24100 | 75.4033  | 22.9267 | -1.7176 | 0.000848 | 0.02597 | -                 |
| LOC_Os12g18700 | 8.1200   | 2.3700  | -1.7766 | 0.000855 | 0.02615 | -                 |
| LOC_Os11g42510 | 4.8167   | 25.9167 | 2.4278  | 0.000856 | 0.02615 | naat-A            |
| LOC_Os08g40910 | 0.1767   | 0.9467  | 2.4218  | 0.000857 | 0.02615 | -                 |
| LOC_Os01g02600 | 2.4900   | 7.1367  | 1.5191  | 0.000861 | 0.02626 | At5g39020         |
| LOC_Os05g05060 | 110.7700 | 27.1067 | -2.0308 | 0.000867 | 0.02639 | -                 |
| LOC_Os02g01280 | 3.9700   | 10.3833 | 1.3871  | 0.000874 | 0.02656 | -                 |
| LOC_Os03g55030 | 4.1000   | 18.8767 | 2.2029  | 0.000877 | 0.02662 | UGT83A1           |
| LOC_Os08g42990 | 0.1900   | 1.4233  | 2.9052  | 0.000882 | 0.02675 | -                 |
| LOC_Os07g48490 | 204.3400 | 73.1233 | -1.4826 | 0.00089  | 0.02698 | -                 |
| LOC_Os12g36810 | 0.6367   | 2.6233  | 2.0428  | 0.000892 | 0.02701 | GSVIVT00026920001 |
| LOC_Os08g18974 | 0.0300   | 0.6833  | 4.5096  | 0.000895 | 0.02701 | -                 |
| LOC_Os04g16760 | 7.6633   | 3.7733  | -1.0221 | 0.000895 | 0.02701 | psaA              |
| LOC_Os03g49830 | 6.2100   | 1.6967  | -1.8719 | 0.000898 | 0.02704 | At5g22090         |
| LOC_Os11g32750 | 7.7033   | 2.3000  | -1.7438 | 0.000898 | 0.02704 | NUDT13            |
| LOC_Os11g05770 | 2.2367   | 5.4600  | 1.2876  | 0.000904 | 0.02719 | OFP13             |
| LOC_Os10g21250 | 4.3267   | 2.0500  | -1.0776 | 0.000907 | 0.02725 | psaA              |
| LOC_Os02g49660 | 1.2633   | 0.2933  | -2.1066 | 0.000923 | 0.0277  | TBL19             |
| LOC_Os05g15530 | 4.6333   | 19.0567 | 2.0402  | 0.000925 | 0.02772 | DAAT              |
| LOC_Os12g43130 | 12.8167  | 47.0033 | 1.8747  | 0.000934 | 0.02795 | PSY               |
| LOC_Os04g53930 | 1.8433   | 6.3367  | 1.7814  | 0.000935 | 0.02797 | 4-Oct             |
| LOC_Os05g48390 | 32.2833  | 12.8533 | -1.3286 | 0.00094  | 0.02807 | UBC24             |
| LOC_Os06g23780 | 0.0010   | 0.3233  | 8.3369  | 0.000946 | 0.02823 | ACX4              |
| LOC_Os05g04600 | 1.8533   | 10.1933 | 2.4594  | 0.000951 | 0.02834 | ABC11             |
| LOC_Os04g47150 | 0.0933   | 0.0010  | -6.5443 | 0.000958 | 0.02849 | SBT1.2            |
| LOC_Os10g38740 | 9.5267   | 39.7267 | 2.0601  | 0.000961 | 0.02856 | GSTU6             |
| LOC_Os01g47490 | 9.3967   | 19.6133 | 1.0616  | 0.000974 | 0.02893 | -                 |
| LOC_Os01g44960 | 1.9333   | 7.4500  | 1.9462  | 0.00098  | 0.02906 | ephx3             |
| LOC_Os08g27170 | 2.3233   | 0.2133  | -3.4450 | 0.000983 | 0.02912 | SARD1             |
| LOC_Os12g02470 | 2.6867   | 0.1033  | -4.7004 | 0.000989 | 0.02922 | WRKY53            |
| LOC_Os08g12880 | 1.4800   | 0.2733  | -2.4369 | 0.000989 | 0.02922 | -                 |
| LOC_Os02g43170 | 50.9633  | 15.8433 | -1.6856 | 0.00099  | 0.02922 | BBX21             |
| LOC_Os04g48460 | 4.4667   | 10.7100 | 1.2617  | 0.000994 | 0.02925 | CYP704C1          |
| LOC_Os07g45210 | 0.1433   | 0.0010  | -7.1632 | 0.000997 | 0.02925 | -                 |
| LOC_Os01g73110 | 28.1000  | 78.1333 | 1.4754  | 0.000998 | 0.02925 | -                 |



|                |          |          |         |          |         |           |
|----------------|----------|----------|---------|----------|---------|-----------|
| LOC_Os05g07980 | 0.3333   | 0.0600   | -2.4739 | 0.000998 | 0.02925 | -         |
| LOC_Os06g23350 | 0.6867   | 6.2400   | 3.1839  | 0.000998 | 0.02925 | -         |
| LOC_Os06g01972 | 7.8233   | 1.3667   | -2.5171 | 0.000998 | 0.02925 | At3g30340 |
| LOC_Os12g06010 | 0.0010   | 0.0367   | 5.1964  | 0.001001 | 0.0293  | -         |
| LOC_Os01g03310 | 970.3533 | 300.7800 | -1.6898 | 0.001011 | 0.02957 | RBB13.3   |
| LOC_Os03g51530 | 18.1533  | 69.2033  | 1.9306  | 0.001015 | 0.02965 | -         |
| LOC_Os03g04080 | 0.9367   | 11.4633  | 3.6133  | 0.00102  | 0.02977 | -         |
| LOC_Os02g27310 | 5.3000   | 2.1233   | -1.3197 | 0.001022 | 0.02979 | CRK41     |
| LOC_Os03g32490 | 103.4500 | 485.5933 | 2.2308  | 0.001031 | 0.03    | ycf36     |
| LOC_Os11g12300 | 1.5833   | 0.2367   | -2.7420 | 0.001031 | 0.03    | RPM1      |
| LOC_Os11g29050 | 2.6733   | 1.0367   | -1.3667 | 0.001036 | 0.0301  | RPM1      |
| LOC_Os12g32470 | 6.8767   | 2.5867   | -1.4106 | 0.001038 | 0.03013 | -         |
| LOC_Os03g61310 | 1.7933   | 0.5033   | -1.8331 | 0.001039 | 0.03013 | RLK1      |
| LOC_Os01g65380 | 21.0833  | 51.6633  | 1.2930  | 0.001049 | 0.03034 | PATL5     |
| LOC_Os01g41770 | 0.1300   | 0.9067   | 2.8021  | 0.00105  | 0.03034 | GSO2      |
| LOC_Os05g06399 | 4.4433   | 16.2533  | 1.8710  | 0.00105  | 0.03034 | -         |
| LOC_Os03g16390 | 29.8900  | 8.2200   | -1.8625 | 0.001051 | 0.03036 | -         |
| LOC_Os11g11960 | 23.0100  | 3.7667   | -2.6109 | 0.001058 | 0.0305  | RPM1      |
| LOC_Os01g47420 | 14.6467  | 5.5167   | -1.4087 | 0.001059 | 0.0305  | phhB      |
| LOC_Os06g24430 | 0.4267   | 2.9833   | 2.8057  | 0.001062 | 0.03056 | -         |
| LOC_Os07g24000 | 0.0010   | 0.1933   | 7.5949  | 0.001072 | 0.03078 | -         |
| LOC_Os06g10109 | 5.1200   | 1.1467   | -2.1587 | 0.001074 | 0.03078 | -         |
| LOC_Os03g63580 | 0.3100   | 1.6967   | 2.4524  | 0.001082 | 0.03095 | NPC4      |
| LOC_Os05g01675 | 8.1067   | 3.9900   | -1.0227 | 0.001089 | 0.03113 | psaA      |
| LOC_Os10g39220 | 14.1067  | 29.2667  | 1.0529  | 0.001094 | 0.03123 | TOM3      |
| LOC_Os04g48070 | 1.4433   | 4.0067   | 1.4730  | 0.0011   | 0.03139 | ROC4      |
| LOC_Os11g32030 | 0.9867   | 2.6567   | 1.4290  | 0.00111  | 0.0316  | SDR2a     |
| LOC_Os01g52100 | 0.7600   | 1.9567   | 1.3643  | 0.00111  | 0.0316  | -         |
| LOC_Os04g54070 | 2.6333   | 0.7467   | -1.8184 | 0.001116 | 0.03173 | SD18      |
| LOC_Os01g43460 | 5.1933   | 51.1200  | 3.2992  | 0.001128 | 0.03198 | SLAH3     |
| LOC_Os01g62540 | 4.9033   | 1.7700   | -1.4700 | 0.00113  | 0.03198 | -         |
| LOC_Os08g39840 | 30.4200  | 2.9333   | -3.3744 | 0.001131 | 0.03198 | CM-LOX1   |
| LOC_Os07g27660 | 0.9267   | 0.1633   | -2.5042 | 0.001132 | 0.03198 | -         |
| LOC_Os04g30250 | 3.6633   | 0.7467   | -2.2946 | 0.001138 | 0.03214 | WAK2      |
| LOC_Os03g43720 | 7.9967   | 35.6067  | 2.1547  | 0.001146 | 0.03233 | 7-Oct     |
| LOC_Os10g18370 | 17.3567  | 167.2200 | 3.2682  | 0.001149 | 0.03238 | Cpar_0662 |
| LOC_Os08g03290 | 240.1567 | 517.9467 | 1.1088  | 0.001152 | 0.03242 | GAPC      |
| LOC_Os12g23980 | 0.1333   | 0.8867   | 2.7334  | 0.001158 | 0.03256 | SBT1.2    |
| LOC_Os04g13140 | 0.1067   | 1.3567   | 3.6689  | 0.001161 | 0.03262 | OsI_14861 |
| LOC_Os02g48770 | 4.2333   | 0.3567   | -3.5691 | 0.001168 | 0.03279 | AAMT1     |
| LOC_Os11g37200 | 2.8467   | 0.4533   | -2.6506 | 0.00117  | 0.03279 | At4g15470 |
| LOC_Os06g45040 | 0.0200   | 0.6133   | 4.9386  | 0.001174 | 0.03287 | BBX32     |
| LOC_Os07g43820 | 0.5700   | 2.8200   | 2.3067  | 0.001177 | 0.03292 | XIPI      |

|                |          |          |         |          |         |              |
|----------------|----------|----------|---------|----------|---------|--------------|
| LOC_Os02g12130 | 6.5200   | 1.3100   | -2.3153 | 0.001181 | 0.03293 | At1g61370    |
| LOC_Os11g43320 | 0.7300   | 0.3067   | -1.2512 | 0.001184 | 0.03293 | RPM1         |
| LOC_Os04g52440 | 0.0633   | 0.6233   | 3.2990  | 0.001185 | 0.03293 | Os04g0614500 |
| LOC_Os06g41880 | 0.2000   | 0.5800   | 1.5361  | 0.001185 | 0.03293 | AIR3         |
| LOC_Os06g41940 | 0.3800   | 2.0433   | 2.4269  | 0.001186 | 0.03293 | -            |
| LOC_Os11g41210 | 0.2233   | 0.0367   | -2.6067 | 0.001186 | 0.03293 | -            |
| LOC_Os12g04595 | 0.9333   | 0.2633   | -1.8255 | 0.001188 | 0.03293 | gtf2e1-1     |
| LOC_Os08g24750 | 0.5933   | 3.9333   | 2.7288  | 0.001189 | 0.03293 | FT1          |
| LOC_Os09g19300 | 10.9067  | 2.3767   | -2.1982 | 0.00119  | 0.03293 | -            |
| LOC_Os03g40100 | 5.4267   | 21.4000  | 1.9795  | 0.001191 | 0.03293 | ACR4         |
| LOC_Os04g32240 | 1.0367   | 0.2667   | -1.9588 | 0.001191 | 0.03293 | -            |
| LOC_Os08g29854 | 0.6033   | 1.7000   | 1.4945  | 0.001192 | 0.03293 | RPM1         |
| LOC_Os09g07200 | 0.1900   | 2.9433   | 3.9534  | 0.001193 | 0.03293 | FRS5         |
| LOC_Os01g24820 | 0.0267   | 0.5467   | 4.3576  | 0.001199 | 0.03304 | RGA2         |
| LOC_Os02g53620 | 2.3700   | 0.7600   | -1.6408 | 0.0012   | 0.03304 | NFYA5        |
| LOC_Os12g38170 | 771.1267 | 154.8667 | -2.3159 | 0.001203 | 0.03308 | -            |
| LOC_Os10g02814 | 0.2133   | 0.6833   | 1.6795  | 0.001206 | 0.03313 | XLG3         |
| LOC_Os04g27430 | 1.2000   | 11.3000  | 3.2352  | 0.001215 | 0.03333 | -            |
| LOC_Os02g10310 | 49.9267  | 115.6733 | 1.2122  | 0.001215 | 0.03333 | FAH          |
| LOC_Os05g03920 | 18.9233  | 58.7633  | 1.6347  | 0.001231 | 0.03371 | CRK2         |
| LOC_Os06g21380 | 6.5233   | 38.5767  | 2.5640  | 0.001233 | 0.03375 | CTPA3        |
| LOC_Os12g05120 | 1.1967   | 0.3533   | -1.7599 | 0.001235 | 0.03375 | PXC1         |
| LOC_Os04g12970 | 1.6100   | 15.7233  | 3.2878  | 0.001247 | 0.03407 | UGT74E2      |
| LOC_Os07g47010 | 0.0010   | 0.1233   | 6.9464  | 0.001254 | 0.03421 | At1g48120    |
| LOC_Os09g14670 | 3.0900   | 7.3633   | 1.2528  | 0.001264 | 0.03445 | -            |
| LOC_Os07g34850 | 1.1367   | 0.1867   | -2.6063 | 0.001268 | 0.03449 | nep1         |
| LOC_Os06g08560 | 8.7033   | 3.7300   | -1.2224 | 0.001269 | 0.03449 | ABCC13       |
| LOC_Os04g28820 | 0.0010   | 0.0333   | 5.0589  | 0.001269 | 0.03449 | pif1         |
| LOC_Os07g48790 | 0.2333   | 0.0010   | -7.8662 | 0.001276 | 0.03458 | KINB1        |
| MSTRG.17988    | 0.2100   | 1.8633   | 3.1494  | 0.001276 | 0.03458 | --           |
| LOC_Os09g07190 | 0.1300   | 1.9233   | 3.8870  | 0.001283 | 0.03474 | Tf2-11       |
| LOC_Os12g23150 | 12.6800  | 5.3367   | -1.2485 | 0.001294 | 0.03497 | PGLP1B       |
| LOC_Os09g38920 | 4.4133   | 17.6733  | 2.0016  | 0.001295 | 0.03497 | SAG12        |
| LOC_Os11g02310 | 1.0400   | 0.3000   | -1.7935 | 0.0013   | 0.03505 | PCMP-E101    |
| LOC_Os11g04150 | 4.0600   | 15.1567  | 1.9004  | 0.001301 | 0.03505 | ZIFL1        |
| LOC_Os11g29210 | 3.4600   | 0.7833   | -2.1431 | 0.001307 | 0.03519 | -            |
| LOC_Os08g01480 | 0.0100   | 0.3633   | 5.1832  | 0.001312 | 0.03525 | CYP71C4      |
| LOC_Os08g10290 | 8.6467   | 1.1900   | -2.8612 | 0.001312 | 0.03525 | At1g56130    |
| LOC_Os11g37960 | 5.5867   | 22.9700  | 2.0397  | 0.001314 | 0.03526 | PR4A         |
| LOC_Os04g43360 | 2.9100   | 1.3067   | -1.1551 | 0.001315 | 0.03527 | BGLU14       |
| LOC_Os06g14770 | 1.1600   | 0.0800   | -3.8580 | 0.001323 | 0.0354  | -            |
| LOC_Os12g25090 | 1.9533   | 10.3933  | 2.4116  | 0.001324 | 0.0354  | -            |
| LOC_Os11g40470 | 0.5100   | 0.1367   | -1.8998 | 0.001337 | 0.03572 | TY3B-G       |

|                |           |           |         |          |         |              |
|----------------|-----------|-----------|---------|----------|---------|--------------|
| LOC_Os12g41650 | 16.7333   | 41.8733   | 1.3233  | 0.001363 | 0.03638 | PIF1         |
| LOC_Os08g07890 | 1.6233    | 0.4333    | -1.9054 | 0.001367 | 0.03643 | SERK1        |
| LOC_Os09g13890 | 1.0400    | 0.3167    | -1.7155 | 0.001369 | 0.03643 | CBP60C       |
| LOC_Os01g26210 | 1.1267    | 0.1067    | -3.4009 | 0.001379 | 0.03664 | WAK3         |
| LOC_Os02g21750 | 1.6000    | 0.3267    | -2.2922 | 0.00138  | 0.03664 | ABCB11       |
| LOC_Os12g02320 | 3430.8967 | 7497.5300 | 1.1278  | 0.001392 | 0.03689 | LTP          |
| LOC_Os09g16950 | 4.9433    | 0.6633    | -2.8977 | 0.001396 | 0.03692 | LECRK91      |
| LOC_Os01g71820 | 0.2733    | 1.4833    | 2.4401  | 0.001396 | 0.03692 | -            |
| LOC_Os01g27190 | 0.0010    | 0.2900    | 8.1799  | 0.0014   | 0.03701 | -            |
| LOC_Os12g35490 | 0.1300    | 0.0010    | -7.0224 | 0.001408 | 0.03717 | -            |
| LOC_Os03g63260 | 1.4167    | 0.4967    | -1.5122 | 0.001413 | 0.03727 | PCMP-E76     |
| LOC_Os01g49710 | 2.0033    | 10.8500   | 2.4372  | 0.001418 | 0.03736 | GSTU6        |
| LOC_Os06g32890 | 0.3533    | 0.0533    | -2.7279 | 0.001421 | 0.0374  | Tf2-6        |
| LOC_Os01g42860 | 9.3867    | 77.4900   | 3.0453  | 0.001425 | 0.03744 | -            |
| LOC_Os04g51796 | 0.1200    | 1.5067    | 3.6503  | 0.001426 | 0.03745 | -            |
| LOC_Os01g44130 | 0.1833    | 1.3433    | 2.8733  | 0.00144  | 0.03772 | Os05g0567100 |
| LOC_Os07g48260 | 2.3233    | 0.7067    | -1.7171 | 0.001441 | 0.03772 | WRKY54       |
| LOC_Os01g56235 | 1.3767    | 0.1100    | -3.6456 | 0.00145  | 0.03792 | At4g15545    |
| LOC_Os11g46870 | 0.2700    | 0.0500    | -2.4330 | 0.001457 | 0.03808 | WAK5         |
| LOC_Os09g15480 | 1.4500    | 14.0767   | 3.2792  | 0.001459 | 0.0381  | Tango2       |
| LOC_Os04g44150 | 0.0567    | 0.5000    | 3.1414  | 0.001465 | 0.0382  | GA2OX8       |
| LOC_Os02g30190 | 9.3000    | 0.9967    | -3.2220 | 0.001466 | 0.0382  | RIN4         |
| LOC_Os01g47900 | 5.9900    | 1.3900    | -2.1075 | 0.00147  | 0.03826 | At5g24080    |
| LOC_Os07g02690 | 0.0967    | 0.6800    | 2.8144  | 0.001474 | 0.03834 | -            |
| MSTRG.4623     | 1.3667    | 0.6233    | -1.1326 | 0.00148  | 0.03846 | --           |
| LOC_Os05g45200 | 1.0167    | 4.6033    | 2.1788  | 0.001486 | 0.03857 | UGT88A1      |
| LOC_Os04g51410 | 8.2500    | 25.5033   | 1.6282  | 0.001492 | 0.03871 | -            |
| LOC_Os04g34490 | 0.5467    | 0.0167    | -5.0356 | 0.001508 | 0.03907 | At3g30340    |
| LOC_Os02g56820 | 0.3467    | 1.3600    | 1.9720  | 0.001513 | 0.03915 | At2g02240    |
| LOC_Os11g10480 | 13.8900   | 81.6033   | 2.5546  | 0.001515 | 0.03917 | ADH1         |
| LOC_Os09g38620 | 3.2067    | 10.7300   | 1.7425  | 0.001516 | 0.03918 | CPR          |
| MSTRG.6468     | 160.2600  | 67.8867   | -1.2392 | 0.001519 | 0.03923 | Os06g0207000 |
| LOC_Os10g12480 | 9.0833    | 4.4867    | -1.0176 | 0.001532 | 0.0395  | -            |
| LOC_Os06g43320 | 2.7033    | 12.9433   | 2.2594  | 0.001538 | 0.03962 | CYP71D55     |
| LOC_Os10g39610 | 0.1433    | 1.6633    | 3.5366  | 0.001539 | 0.03963 | -            |
| LOC_Os12g25660 | 10.9533   | 1.3400    | -3.0311 | 0.001547 | 0.03978 | CYP94B3      |
| LOC_Os02g07170 | 0.5467    | 3.4133    | 2.6424  | 0.001548 | 0.03978 | KAN2         |
| LOC_Os12g34290 | 0.1433    | 0.0010    | -7.1632 | 0.001564 | 0.04012 | At3g52670    |
| LOC_Os03g22790 | 12.0667   | 44.7600   | 1.8912  | 0.001565 | 0.04012 | BAM9         |
| LOC_Os05g47840 | 0.6800    | 0.2067    | -1.7182 | 0.001566 | 0.04012 | IPT1         |
| LOC_Os05g38150 | 17.0333   | 36.6767   | 1.1065  | 0.00158  | 0.04035 | P5CS         |
| LOC_Os06g28000 | 0.0300    | 0.3967    | 3.7249  | 0.00158  | 0.04035 | -            |
| LOC_Os06g46500 | 1.3967    | 4.2633    | 1.6100  | 0.001581 | 0.04035 | -            |

|                |         |          |         |          |         |              |
|----------------|---------|----------|---------|----------|---------|--------------|
| LOC_Os09g14610 | 3.9900  | 1.9500   | -1.0329 | 0.001582 | 0.04035 | DCL2B        |
| LOC_Os03g29930 | 11.4300 | 3.1867   | -1.8427 | 0.00159  | 0.04052 | -            |
| LOC_Os03g16950 | 10.1367 | 44.5733  | 2.1366  | 0.001594 | 0.04055 | CRRSP55      |
| LOC_Os08g07240 | 0.1500  | 2.5067   | 4.0627  | 0.001594 | 0.04055 | -            |
| LOC_Os03g16670 | 21.0367 | 106.7667 | 2.3435  | 0.001604 | 0.04072 | SDT1         |
| LOC_Os04g58030 | 0.7267  | 2.7367   | 1.9131  | 0.001612 | 0.04088 | -            |
| LOC_Os05g01760 | 18.4400 | 45.4267  | 1.3007  | 0.001614 | 0.04088 | -            |
| LOC_Os12g37780 | 1.3200  | 2.7833   | 1.0763  | 0.001614 | 0.04088 | -            |
| LOC_Os10g37400 | 4.0500  | 13.9667  | 1.7860  | 0.001628 | 0.04114 | -            |
| LOC_Os08g35630 | 3.1000  | 10.3467  | 1.7388  | 0.001628 | 0.04114 | -            |
| LOC_Os10g19160 | 0.0300  | 0.1533   | 2.3536  | 0.001634 | 0.04125 | At3g47570    |
| LOC_Os03g57690 | 38.0833 | 96.8233  | 1.3462  | 0.00164  | 0.04134 | Os03g0790900 |
| LOC_Os02g04510 | 1.3600  | 13.8433  | 3.3475  | 0.001643 | 0.04135 | DVR          |
| LOC_Os03g26930 | 2.9033  | 1.0333   | -1.4904 | 0.001644 | 0.04135 | CXP;2-3      |
| LOC_Os09g37394 | 0.3233  | 3.5567   | 3.4594  | 0.001652 | 0.04148 | SAUR39       |
| LOC_Os04g33030 | 77.5700 | 33.6133  | -1.2065 | 0.001665 | 0.04177 | BRG3         |
| LOC_Os08g09860 | 25.4833 | 12.6000  | -1.0161 | 0.001675 | 0.04199 | GLO1         |
| LOC_Os02g18410 | 0.8367  | 6.9300   | 3.0501  | 0.001687 | 0.04226 | PCAP1        |
| LOC_Os10g30880 | 13.6467 | 3.0233   | -2.1743 | 0.001689 | 0.04227 | -            |
| LOC_Os12g43660 | 3.7533  | 1.2500   | -1.5862 | 0.001699 | 0.04246 | HSL1         |
| LOC_Os03g63970 | 7.2400  | 16.2867  | 1.1696  | 0.001705 | 0.04256 | 20ox1        |
| LOC_Os09g25070 | 13.1400 | 1.1133   | -3.5610 | 0.001709 | 0.04261 | WRKY40       |
| LOC_Os05g19910 | 0.7700  | 2.1167   | 1.4589  | 0.001714 | 0.04267 | TAT          |
| LOC_Os09g24260 | 6.6867  | 13.9200  | 1.0578  | 0.001714 | 0.04267 | -            |
| LOC_Os04g07260 | 0.6967  | 0.1467   | -2.2479 | 0.001732 | 0.04302 | -            |
| LOC_Os04g40990 | 7.2000  | 74.3200  | 3.3677  | 0.001756 | 0.04359 | MS           |
| MSTRG.5533     | 0.8767  | 0.0333   | -4.7170 | 0.00176  | 0.04365 | --           |
| LOC_Os10g31320 | 1.6600  | 4.4967   | 1.4377  | 0.001763 | 0.04367 | -            |
| LOC_Os10g25180 | 0.0010  | 0.3133   | 8.2916  | 0.001769 | 0.04374 | SAC2         |
| LOC_Os06g48600 | 52.9867 | 25.0167  | -1.0827 | 0.001771 | 0.04374 | -            |
| LOC_Os09g31490 | 3.8367  | 8.5367   | 1.1538  | 0.001772 | 0.04374 | CCR1         |
| LOC_Os06g46160 | 0.2400  | 0.0010   | -7.9069 | 0.001779 | 0.04388 | -            |
| LOC_Os10g07340 | 4.2300  | 13.4900  | 1.6732  | 0.001787 | 0.04403 | -            |
| LOC_Os01g71790 | 14.0133 | 3.9500   | -1.8269 | 0.001788 | 0.04403 | NAC018       |
| MSTRG.27573    | 1.6367  | 0.1433   | -3.5133 | 0.001796 | 0.04413 | --           |
| LOC_Os05g03130 | 0.2000  | 2.6667   | 3.7370  | 0.001797 | 0.04413 | LT101.2      |
| LOC_Os03g17350 | 1.6100  | 6.2133   | 1.9483  | 0.001799 | 0.04413 | RCN1         |
| LOC_Os10g11920 | 0.0067  | 0.1900   | 4.8329  | 0.001801 | 0.04414 | Tf2-6        |
| MSTRG.10455    | 0.0400  | 1.0000   | 4.6439  | 0.001802 | 0.04414 | --           |
| LOC_Os02g27000 | 0.8533  | 2.1633   | 1.3421  | 0.00181  | 0.0443  | Morc4        |
| LOC_Os01g08470 | 0.5600  | 1.8400   | 1.7162  | 0.001828 | 0.04463 | LRX4         |
| LOC_Os07g29960 | 0.1767  | 0.0010   | -7.4649 | 0.001829 | 0.04463 | CYP87A3      |
| LOC_Os05g38000 | 0.1500  | 2.4600   | 4.0356  | 0.00183  | 0.04463 | ROPGEF7      |

|                        |         |         |         |          |         |              |
|------------------------|---------|---------|---------|----------|---------|--------------|
| LOC_Os07g44850         | 0.3700  | 2.5067  | 2.7602  | 0.001832 | 0.04463 | CXE18        |
| LOC_Os04g47080         | 0.0900  | 0.5500  | 2.6114  | 0.001833 | 0.04463 | LC           |
| LOC_Os04g33080         | 14.0867 | 36.0467 | 1.3555  | 0.001833 | 0.04463 | Os04g0403701 |
| LOC_Os05g11750         | 0.2533  | 0.0267  | -3.2479 | 0.001865 | 0.04535 | PBS1         |
| ChrSy.fgenes.h.gene.78 | 0.0100  | 0.2033  | 4.3458  | 0.001868 | 0.04538 | -            |
| LOC_Os10g40614         | 0.0867  | 1.7733  | 4.3548  | 0.001871 | 0.04542 | EARLI1       |
| LOC_Os12g31860         | 30.2433 | 72.3767 | 1.2589  | 0.001873 | 0.04542 | UPS2         |
| LOC_Os01g68960         | 0.2933  | 1.3733  | 2.2271  | 0.001877 | 0.04545 | -            |
| LOC_Os08g13250         | 0.7167  | 0.0867  | -3.0478 | 0.001886 | 0.0456  | BPM2         |
| MSTRG.826              | 0.7067  | 1.7600  | 1.3165  | 0.001891 | 0.04566 | --           |
| LOC_Os03g58290         | 5.3533  | 0.3233  | -4.0493 | 0.001898 | 0.0458  | BX1          |
| LOC_Os03g55180         | 7.0600  | 2.2567  | -1.6455 | 0.0019   | 0.04581 | -            |
| LOC_Os04g28250         | 4.1367  | 19.8067 | 2.2594  | 0.001915 | 0.04613 | Os04g0350100 |
| LOC_Os07g25540         | 0.6033  | 2.1833  | 1.8555  | 0.001927 | 0.04638 | YUC9         |
| LOC_Os10g01800         | 0.0667  | 1.2433  | 4.2211  | 0.001936 | 0.04655 | -            |
| LOC_Os09g10950         | 2.1433  | 5.5667  | 1.3770  | 0.001939 | 0.04659 | -            |
| MSTRG.6459             | 23.5333 | 11.3200 | -1.0558 | 0.001965 | 0.04714 | --           |
| MSTRG.5947             | 12.0233 | 4.7233  | -1.3480 | 0.001969 | 0.04719 | --           |
| LOC_Os01g04200         | 6.7833  | 13.7400 | 1.0183  | 0.001972 | 0.04721 | lactb2       |
| LOC_Os07g33620         | 1.3233  | 3.6400  | 1.4598  | 0.001979 | 0.04727 | CYP716B1     |
| LOC_Os04g52460         | 12.9400 | 31.2933 | 1.2740  | 0.001987 | 0.04737 | -            |
| LOC_Os01g53650         | 0.0010  | 0.3000  | 8.2288  | 0.00199  | 0.04738 | Os01g0738400 |
| LOC_Os09g15044         | 0.0233  | 0.6767  | 4.8580  | 0.001991 | 0.04738 | -            |
| LOC_Os10g41170         | 0.1567  | 0.6833  | 2.1249  | 0.002004 | 0.04766 | caa43        |
| LOC_Os03g05225         | 16.5300 | 7.5567  | -1.1293 | 0.002011 | 0.04774 | -            |
| LOC_Os06g40580         | 1.1933  | 0.2700  | -2.1440 | 0.002021 | 0.04789 | -            |
| MSTRG.27746            | 9.9133  | 4.0533  | -1.2903 | 0.002026 | 0.04797 | --           |
| LOC_Os02g34630         | 4.5833  | 10.2633 | 1.1630  | 0.00204  | 0.04827 | TERF1        |
| LOC_Os02g54870         | 0.1867  | 0.5833  | 1.6439  | 0.00205  | 0.04845 | -            |
| LOC_Os04g11400         | 55.5867 | 17.0433 | -1.7055 | 0.002062 | 0.04869 | -            |
| LOC_Os03g49430         | 0.5833  | 1.7867  | 1.6149  | 0.002064 | 0.04869 | prpf18       |
| LOC_Os03g05880         | 0.6200  | 2.3467  | 1.9203  | 0.002065 | 0.04869 | nicC         |
| LOC_Os01g35230         | 1.1533  | 0.3867  | -1.5766 | 0.002067 | 0.0487  | At5g59530    |
| LOC_Os04g56430         | 23.1800 | 95.3433 | 2.0403  | 0.002072 | 0.04876 | CRRSP38      |
| LOC_Os09g29520         | 6.1333  | 1.4867  | -2.0446 | 0.002073 | 0.04876 | WAK3         |
| LOC_Os04g56470         | 0.3633  | 2.2033  | 2.6003  | 0.002084 | 0.04896 | AAP2         |
| LOC_Os08g03420         | 0.3967  | 1.7033  | 2.1024  | 0.002091 | 0.04908 | At3g27220    |
| LOC_Os05g05030         | 16.3133 | 2.8033  | -2.5408 | 0.002108 | 0.04944 | -            |
| LOC_Os03g61410         | 0.0010  | 0.2633  | 8.0407  | 0.002115 | 0.04952 | -            |
| LOC_Os06g50910         | 0.1833  | 0.3700  | 1.0131  | 0.002115 | 0.04952 | Os06g0724700 |
| LOC_Os09g36810         | 0.8733  | 2.1900  | 1.3263  | 0.002124 | 0.0497  | Os09g0539200 |

**Table S3.** Statistical data of total differentially expressed genes (DEGs) for WR\_CK vs. WR\_D.

| id             | WR_CK<br>_mean | WR_D_<br>mean | log2(fc) | PValue   | FDR      | Symbol            |
|----------------|----------------|---------------|----------|----------|----------|-------------------|
| LOC_Os02g58720 | 8.4100         | 0.6333        | -3.7311  | 2.11E-32 | 5.96E-28 | PER64             |
| LOC_Os03g61160 | 6.9100         | 93.5767       | 3.7594   | 2.28E-27 | 3.23E-23 | -                 |
| LOC_Os02g37480 | 1.3700         | 13.9600       | 3.3491   | 1.82E-25 | 1.72E-21 | -                 |
| LOC_Os05g09704 | 42.7133        | 0.9867        | -5.4360  | 7.05E-25 | 4.99E-21 | APS1              |
| LOC_Os09g31478 | 5.8033         | 32.0067       | 2.4634   | 2.03E-23 | 1.15E-19 | -                 |
| LOC_Os10g13700 | 5.6800         | 46.0000       | 3.0177   | 5.23E-23 | 2.47E-19 | PCKA              |
| LOC_Os12g14440 | 39.9733        | 0.7067        | -5.8219  | 1.03E-21 | 4.16E-18 | SALT              |
| LOC_Os05g33900 | 2.8333         | 0.2200        | -3.6869  | 8.26E-21 | 2.92E-17 | At5g07050         |
| LOC_Os01g01650 | 52.5100        | 1.4100        | -5.2188  | 2.41E-20 | 7.58E-17 | IRL               |
| LOC_Os06g16640 | 22.9667        | 0.3733        | -5.9429  | 9.55E-20 | 2.70E-16 | -                 |
| LOC_Os02g06210 | 0.0267         | 0.7567        | 4.8265   | 5.17E-19 | 1.33E-15 | RLP2              |
| LOC_Os01g06640 | 2.8867         | 13.4033       | 2.2151   | 6.79E-19 | 1.60E-15 | BHLH51            |
| LOC_Os03g57460 | 15.5900        | 2.3133        | -2.7526  | 2.60E-18 | 5.66E-15 | FLA16             |
| LOC_Os05g07060 | 3.0233         | 0.1467        | -4.3655  | 3.18E-18 | 6.43E-15 | FLA11             |
| LOC_Os01g54620 | 12.9100        | 1.6067        | -3.0063  | 8.67E-18 | 1.64E-14 | CESA4             |
| LOC_Os01g62490 | 1.5800         | 0.0500        | -4.9819  | 1.52E-17 | 2.70E-14 | LAC12             |
| LOC_Os01g62260 | 0.1300         | 4.2233        | 5.0218   | 3.44E-17 | 5.72E-14 | -                 |
| LOC_Os03g01300 | 71.3733        | 6.1800        | -3.5297  | 8.31E-17 | 1.31E-13 | AZI1              |
| LOC_Os11g46900 | 2.1567         | 0.0667        | -5.0157  | 1.03E-16 | 1.49E-13 | WAK5              |
| LOC_Os05g04500 | 66.0467        | 2.2767        | -4.8585  | 1.05E-16 | 1.49E-13 | GSVIVT00037159001 |
| LOC_Os03g13200 | 24.5633        | 0.3567        | -6.1058  | 6.11E-16 | 8.23E-13 | pod               |
| LOC_Os02g49720 | 8.4933         | 62.1233       | 2.8707   | 7.21E-16 | 9.27E-13 | ALDH2B7           |
| LOC_Os08g26230 | 34.9133        | 8.1767        | -2.0942  | 7.73E-16 | 9.50E-13 | -                 |
| LOC_Os05g31750 | 137.1800       | 22.0500       | -2.6372  | 8.06E-16 | 9.50E-13 | ANN4              |
| LOC_Os10g16974 | 59.6967        | 4.9500        | -3.5921  | 9.05E-16 | 1.02E-12 | CYP75B1           |
| LOC_Os05g35290 | 7.4200         | 1.0367        | -2.8395  | 2.08E-15 | 2.27E-12 | ZB8               |
| LOC_Os05g10210 | 71.3433        | 1.6867        | -5.4025  | 2.81E-15 | 2.94E-12 | APS1              |
| LOC_Os01g32780 | 20.1500        | 88.4800       | 2.1346   | 1.34E-14 | 1.35E-11 | At3g01520         |
| LOC_Os03g43410 | 3.6967         | 0.5333        | -2.7931  | 1.63E-14 | 1.59E-11 | IAA12             |
| LOC_Os07g45100 | 10.6267        | 2.4700        | -2.1051  | 2.06E-14 | 1.94E-11 | -                 |
| LOC_Os06g38160 | 7.5833         | 0.5233        | -3.8570  | 5.06E-14 | 4.62E-11 | LECRK82           |
| LOC_Os08g33150 | 4.7133         | 0.2600        | -4.1802  | 7.16E-14 | 6.29E-11 | ODO1              |
| LOC_Os06g48210 | 1.1433         | 6.6800        | 2.5466   | 7.51E-14 | 6.29E-11 | Os06g0697200      |
| LOC_Os06g38764 | 30.0833        | 2.8133        | -3.4186  | 7.56E-14 | 6.29E-11 | -                 |
| LOC_Os06g40170 | 29.0733        | 3.2467        | -3.1627  | 7.81E-14 | 6.32E-11 | PLD2              |
| LOC_Os08g04500 | 5.9433         | 0.0433        | -7.0997  | 8.54E-14 | 6.71E-11 | TPS2              |
| LOC_Os01g55000 | 2.2967         | 0.2167        | -3.4060  | 9.18E-14 | 7.02E-11 | -                 |
| LOC_Os10g01920 | 19.7933        | 0.6467        | -4.9358  | 1.94E-13 | 1.44E-10 | -                 |

|                |          |         |          |          |          |              |
|----------------|----------|---------|----------|----------|----------|--------------|
| LOC_Os03g03790 | 7.6300   | 0.2733  | -4.8029  | 2.06E-13 | 1.49E-10 | AAE12        |
| LOC_Os02g56380 | 5.0800   | 0.5167  | -3.2975  | 2.33E-13 | 1.65E-10 | WAK3         |
| LOC_Os12g08760 | 105.2367 | 7.0367  | -3.9026  | 2.58E-13 | 1.76E-10 | At1g77060    |
| LOC_Os03g60340 | 49.6133  | 2.7133  | -4.1926  | 2.61E-13 | 1.76E-10 | TBL33        |
| LOC_Os11g07460 | 2.5833   | 0.4267  | -2.5981  | 3.41E-13 | 2.25E-10 | PCF3         |
| LOC_Os05g37140 | 17.7967  | 59.6867 | 1.7458   | 4.13E-13 | 2.66E-10 | FDX6         |
| LOC_Os04g39320 | 12.5033  | 0.5700  | -4.4552  | 5.44E-13 | 3.42E-10 | -            |
| LOC_Os06g39390 | 2.8433   | 0.0567  | -5.6489  | 6.63E-13 | 4.08E-10 | AMAT         |
| LOC_Os04g26870 | 20.3467  | 2.0767  | -3.2925  | 6.89E-13 | 4.15E-10 | Os04g0337500 |
| LOC_Os03g30250 | 2.6133   | 0.5567  | -2.2310  | 7.54E-13 | 4.45E-10 | BC1          |
| LOC_Os04g54810 | 29.6300  | 0.6800  | -5.4454  | 7.80E-13 | 4.50E-10 | BXL4         |
| LOC_Os07g23120 | 28.3000  | 3.1667  | -3.1598  | 8.59E-13 | 4.86E-10 | CDI          |
| LOC_Os03g10320 | 4.2400   | 14.2400 | 1.7478   | 9.94E-13 | 5.51E-10 | -            |
| LOC_Os09g04050 | 11.2233  | 1.4700  | -2.9326  | 1.06E-12 | 5.78E-10 | CCR1         |
| LOC_Os11g07670 | 10.1033  | 1.6767  | -2.5912  | 1.37E-12 | 7.34E-10 | DIR21        |
| LOC_Os10g35950 | 29.9333  | 0.9667  | -4.9526  | 1.62E-12 | 8.49E-10 | HSR201       |
| LOC_Os02g09359 | 11.4033  | 3.3400  | -1.7715  | 1.73E-12 | 8.92E-10 | At3g15890    |
| LOC_Os04g28620 | 59.0133  | 1.1933  | -5.6280  | 1.90E-12 | 9.58E-10 | FAR1         |
| LOC_Os02g41780 | 2.4400   | 0.1967  | -3.6331  | 2.30E-12 | 1.14E-09 | At1g06890    |
| LOC_Os09g25000 | 6.1667   | 0.8500  | -2.8590  | 2.35E-12 | 1.15E-09 | PUB45        |
| LOC_Os05g38230 | 32.8400  | 3.1367  | -3.3881  | 4.18E-12 | 2.00E-09 | AKR4C10      |
| LOC_Os07g01370 | 4.1933   | 0.3600  | -3.5420  | 4.80E-12 | 2.27E-09 | PRX74        |
| LOC_Os03g38470 | 3.1700   | 0.0010  | -11.6303 | 5.01E-12 | 2.33E-09 | At5g55050    |
| LOC_Os01g22249 | 24.1833  | 3.5967  | -2.7493  | 5.72E-12 | 2.61E-09 | PER1         |
| LOC_Os03g29150 | 6.8733   | 0.4933  | -3.8004  | 6.04E-12 | 2.71E-09 | 3BETAHSD/D1  |
| LOC_Os05g09740 | 134.8033 | 4.5200  | -4.8984  | 6.12E-12 | 2.71E-09 | APS1         |
| LOC_Os01g18240 | 5.6233   | 0.8067  | -2.8014  | 7.00E-12 | 3.05E-09 | MYB86        |
| LOC_Os04g43800 | 9.2967   | 0.7167  | -3.6973  | 7.14E-12 | 3.06E-09 | PAL          |
| LOC_Os03g63540 | 6.7533   | 0.4400  | -3.9400  | 8.31E-12 | 3.51E-09 | -            |
| LOC_Os05g02450 | 2.1867   | 8.6433  | 1.9829   | 1.34E-11 | 5.56E-09 | -            |
| LOC_Os11g38010 | 4.8767   | 0.4500  | -3.4379  | 1.87E-11 | 7.65E-09 | WVD2         |
| LOC_Os06g11490 | 21.1567  | 0.9400  | -4.4923  | 2.08E-11 | 8.41E-09 | -            |
| LOC_Os10g38540 | 8.5000   | 0.6200  | -3.7771  | 2.17E-11 | 8.64E-09 | GSTU6        |
| LOC_Os07g14740 | 48.8300  | 11.9967 | -2.0251  | 2.80E-11 | 1.09E-08 | -            |
| LOC_Os07g40940 | 8.3233   | 1.2067  | -2.7861  | 2.81E-11 | 1.09E-08 | PDCB3        |
| LOC_Os04g31350 | 1.8533   | 0.0633  | -4.8710  | 2.94E-11 | 1.12E-08 | -            |
| LOC_Os08g40680 | 0.4633   | 4.3067  | 3.2164   | 3.15E-11 | 1.18E-08 | Chib3H-h     |
| LOC_Os12g35350 | 2.1767   | 9.9633  | 2.1945   | 3.17E-11 | 1.18E-08 | ACBP4        |
| LOC_Os03g12680 | 5.4633   | 1.4333  | -1.9304  | 3.22E-11 | 1.18E-08 | At4g34500    |
| LOC_Os07g07290 | 15.9300  | 3.6833  | -2.1127  | 3.47E-11 | 1.26E-08 | -            |
| LOC_Os10g25040 | 0.9733   | 5.3500  | 2.4585   | 3.56E-11 | 1.28E-08 | rccR         |
| LOC_Os11g29840 | 2.1533   | 0.2000  | -3.4285  | 4.05E-11 | 1.43E-08 | -            |
| LOC_Os06g14370 | 48.4700  | 12.7500 | -1.9266  | 4.33E-11 | 1.51E-08 | PXG4         |

|                |          |          |         |          |          |              |
|----------------|----------|----------|---------|----------|----------|--------------|
| LOC_Os11g27264 | 16.2567  | 2.1533   | -2.9164 | 4.85E-11 | 1.67E-08 | SCPL2        |
| LOC_Os03g48770 | 19.1367  | 73.3167  | 1.9378  | 5.00E-11 | 1.71E-08 | Os03g0693900 |
| LOC_Os02g37800 | 15.7133  | 1.6933   | -3.2141 | 5.08E-11 | 1.71E-08 | Os03g0232800 |
| LOC_Os01g14670 | 132.3667 | 9.1300   | -3.8578 | 7.04E-11 | 2.34E-08 | Os05g0277500 |
| LOC_Os09g20684 | 10.4633  | 0.8667   | -3.5937 | 7.95E-11 | 2.62E-08 | SSL10        |
| LOC_Os03g06940 | 2.1967   | 0.4867   | -2.1743 | 8.15E-11 | 2.65E-08 | Os03g0165400 |
| LOC_Os03g13140 | 1.5433   | 23.0200  | 3.8988  | 8.49E-11 | 2.73E-08 | HB1          |
| LOC_Os06g48250 | 4.3467   | 14.2967  | 1.7177  | 9.12E-11 | 2.90E-08 | SPAC644.07   |
| LOC_Os03g44420 | 5.3400   | 1.0233   | -2.3836 | 9.51E-11 | 2.99E-08 | FTSZ2-1      |
| LOC_Os02g05744 | 13.8600  | 1.3933   | -3.3143 | 9.76E-11 | 3.04E-08 | Os02g0151300 |
| LOC_Os06g18670 | 142.6800 | 24.0967  | -2.5659 | 1.09E-10 | 3.37E-08 | GmIF7GT1     |
| LOC_Os10g40710 | 1.9900   | 0.0533   | -5.2216 | 1.30E-10 | 3.96E-08 | EXPB2        |
| LOC_Os12g01560 | 8.7600   | 0.6633   | -3.7231 | 1.48E-10 | 4.47E-08 | TBL34        |
| LOC_Os11g01570 | 6.5433   | 0.4167   | -3.9731 | 1.53E-10 | 4.56E-08 | TBL34        |
| LOC_Os09g25490 | 10.2000  | 2.6567   | -1.9409 | 1.97E-10 | 5.81E-08 | CESA9        |
| LOC_Os06g09340 | 1.5067   | 0.0600   | -4.6503 | 2.43E-10 | 7.09E-08 | PME12        |
| LOC_Os04g53800 | 8.0967   | 0.7400   | -3.4517 | 2.49E-10 | 7.18E-08 | BAN          |
| LOC_Os01g47070 | 16.7533  | 1.8000   | -3.2184 | 3.29E-10 | 9.38E-08 | CHIT3        |
| LOC_Os03g25490 | 0.1400   | 1.2333   | 3.1391  | 3.32E-10 | 9.38E-08 | CYP734A1     |
| LOC_Os04g02640 | 2.8633   | 0.1167   | -4.6172 | 4.19E-10 | 1.17E-07 | CUT1         |
| LOC_Os04g20330 | 2.1867   | 0.4167   | -2.3918 | 4.50E-10 | 1.24E-07 | UGT92A1      |
| LOC_Os01g68900 | 1.7800   | 0.1700   | -3.3883 | 4.54E-10 | 1.24E-07 | -            |
| LOC_Os04g39150 | 2.6433   | 0.1333   | -4.3092 | 4.54E-10 | 1.24E-07 | MLP423       |
| LOC_Os05g38410 | 0.7100   | 0.0010   | -9.4717 | 4.96E-10 | 1.32E-07 | LAC12        |
| LOC_Os10g32980 | 9.1233   | 1.4833   | -2.6207 | 4.96E-10 | 1.32E-07 | CESA7        |
| LOC_Os01g65690 | 254.5633 | 13.8267  | -4.2025 | 5.07E-10 | 1.34E-07 | DODA1        |
| LOC_Os12g42876 | 174.0233 | 44.0333  | -1.9826 | 5.51E-10 | 1.44E-07 | Os12g0623900 |
| LOC_Os03g03164 | 16.0133  | 2.4267   | -2.7222 | 5.69E-10 | 1.48E-07 | HOS66        |
| LOC_Os12g40890 | 6.1000   | 1.4133   | -2.1097 | 5.89E-10 | 1.51E-07 | IAA30        |
| LOC_Os07g48770 | 36.9500  | 5.8533   | -2.6582 | 6.24E-10 | 1.59E-07 | dfr1         |
| LOC_Os03g32470 | 42.8200  | 5.1400   | -3.0584 | 6.46E-10 | 1.63E-07 | SRG1         |
| LOC_Os06g46680 | 1.1867   | 0.0500   | -4.5688 | 6.53E-10 | 1.64E-07 | CYP77A3      |
| LOC_Os08g06100 | 437.8933 | 38.0533  | -3.5245 | 7.02E-10 | 1.73E-07 | ROMT-9       |
| LOC_Os08g13920 | 434.6467 | 89.2000  | -2.2847 | 7.04E-10 | 1.73E-07 | XTH8         |
| LOC_Os12g02370 | 68.9500  | 6.0133   | -3.5193 | 7.23E-10 | 1.76E-07 | CHI3         |
| LOC_Os04g32820 | 6.5233   | 0.2400   | -4.7645 | 7.44E-10 | 1.80E-07 | -            |
| LOC_Os04g40100 | 20.3333  | 6.5500   | -1.6343 | 7.61E-10 | 1.82E-07 | At1g67900    |
| LOC_Os07g41600 | 2.7433   | 0.2700   | -3.3449 | 7.73E-10 | 1.84E-07 | -            |
| LOC_Os08g34550 | 5.7433   | 1.5200   | -1.9178 | 7.83E-10 | 1.85E-07 | ATL13        |
| LOC_Os06g21270 | 31.2600  | 0.9267   | -5.0761 | 8.71E-10 | 2.04E-07 | -            |
| LOC_Os06g43304 | 5.8567   | 1.0133   | -2.5310 | 9.12E-10 | 2.12E-07 | CYP71D10     |
| LOC_Os01g67090 | 15.0567  | 1.1267   | -3.7403 | 9.58E-10 | 2.20E-07 | IQD14        |
| LOC_Os03g48780 | 52.1133  | 137.6733 | 1.4015  | 1.00E-09 | 2.27E-07 | Os03g0694000 |



|                |          |          |         |          |          |              |
|----------------|----------|----------|---------|----------|----------|--------------|
| LOC_Os07g44090 | 6.4533   | 1.2400   | -2.3797 | 1.00E-09 | 2.27E-07 | MYB86        |
| LOC_Os11g02440 | 67.9933  | 9.2200   | -2.8826 | 1.04E-09 | 2.34E-07 | CHI3         |
| LOC_Os08g43270 | 10.3767  | 2.6133   | -1.9894 | 1.06E-09 | 2.35E-07 | BAG1         |
| LOC_Os04g59150 | 116.5333 | 42.7433  | -1.4470 | 1.07E-09 | 2.35E-07 | PER12        |
| LOC_Os08g01274 | 2.9633   | 0.3433   | -3.1095 | 1.07E-09 | 2.35E-07 | -            |
| LOC_Os01g59819 | 8.1400   | 0.9067   | -3.1664 | 1.14E-09 | 2.48E-07 | BGLU2        |
| LOC_Os04g32800 | 1.6667   | 0.0833   | -4.3219 | 1.22E-09 | 2.63E-07 | -            |
| LOC_Os01g01660 | 11.4967  | 1.3533   | -3.0866 | 1.23E-09 | 2.63E-07 | IRL          |
| LOC_Os05g31760 | 85.4967  | 34.1900  | -1.3223 | 1.30E-09 | 2.77E-07 | ANN3         |
| LOC_Os11g30560 | 14.5467  | 1.4633   | -3.3134 | 1.34E-09 | 2.84E-07 | HSD1         |
| MSTRG.1894     | 16.3767  | 2.7767   | -2.5602 | 1.35E-09 | 2.84E-07 | --           |
| LOC_Os11g30810 | 4.4467   | 0.4233   | -3.3929 | 1.38E-09 | 2.87E-07 | SOT5         |
| LOC_Os05g29710 | 11.3633  | 65.1367  | 2.5191  | 1.60E-09 | 3.30E-07 | ATL9         |
| LOC_Os03g22010 | 15.8000  | 0.7367   | -4.4228 | 1.62E-09 | 3.32E-07 | PER70        |
| LOC_Os02g33550 | 44.3200  | 2.0467   | -4.4366 | 1.66E-09 | 3.37E-07 | -            |
| MSTRG.24111    | 1.8667   | 0.0767   | -4.6057 | 1.74E-09 | 3.51E-07 | --           |
| LOC_Os04g33450 | 73.2600  | 5.1100   | -3.8416 | 1.90E-09 | 3.82E-07 | -            |
| LOC_Os11g19850 | 3.6267   | 28.0300  | 2.9503  | 2.03E-09 | 4.02E-07 | -            |
| LOC_Os02g09260 | 0.4133   | 2.5700   | 2.6364  | 2.03E-09 | 4.02E-07 | CYP71D8      |
| LOC_Os02g09810 | 14.1467  | 57.4133  | 2.0209  | 2.15E-09 | 4.23E-07 | SLC38A1      |
| LOC_Os06g38960 | 4.5767   | 0.7067   | -2.6952 | 2.24E-09 | 4.37E-07 | -            |
| LOC_Os03g12110 | 7.9433   | 1.9867   | -1.9994 | 2.31E-09 | 4.48E-07 | HMT-1        |
| LOC_Os03g44150 | 9.4033   | 24.1867  | 1.3630  | 2.37E-09 | 4.56E-07 | OAT          |
| LOC_Os12g16080 | 5.1800   | 15.8400  | 1.6125  | 2.48E-09 | 4.74E-07 | -            |
| LOC_Os05g06110 | 2.3600   | 0.2400   | -3.2977 | 2.69E-09 | 5.10E-07 | VLN1         |
| LOC_Os06g03640 | 51.0900  | 10.8900  | -2.2300 | 2.83E-09 | 5.34E-07 | BAG3         |
| LOC_Os03g12510 | 45.8500  | 398.0333 | 3.1179  | 2.85E-09 | 5.34E-07 | HB2          |
| LOC_Os07g26110 | 2.2500   | 8.2300   | 1.8710  | 2.93E-09 | 5.46E-07 | Os07g0442900 |
| LOC_Os12g25690 | 20.4833  | 3.5767   | -2.5178 | 3.28E-09 | 6.06E-07 | UGD4         |
| LOC_Os12g16720 | 8.3933   | 27.0533  | 1.6885  | 3.69E-09 | 6.70E-07 | CYP71A9      |
| LOC_Os11g08569 | 6.8633   | 1.4767   | -2.2166 | 3.70E-09 | 6.70E-07 | Os11g0189600 |
| LOC_Os06g04090 | 24.1400  | 2.2833   | -3.4022 | 3.71E-09 | 6.70E-07 | NAC043       |
| LOC_Os01g41900 | 24.6067  | 5.3700   | -2.1961 | 3.72E-09 | 6.70E-07 | DIVARICATA   |
| LOC_Os11g26190 | 6.7133   | 0.6533   | -3.3611 | 4.19E-09 | 7.50E-07 | -            |
| LOC_Os04g01140 | 57.6967  | 6.4300   | -3.1656 | 4.37E-09 | 7.78E-07 | CYP93A2      |
| LOC_Os01g32460 | 31.6200  | 4.2367   | -2.8998 | 4.93E-09 | 8.71E-07 | -            |
| LOC_Os02g53840 | 2.1733   | 0.3067   | -2.8252 | 4.95E-09 | 8.71E-07 | SBT1.7       |
| LOC_Os12g17160 | 2.5867   | 16.3667  | 2.6616  | 5.45E-09 | 9.51E-07 | SOT5         |
| LOC_Os09g26999 | 2.8200   | 0.2033   | -3.7938 | 5.48E-09 | 9.51E-07 | GG3          |
| LOC_Os05g33630 | 389.0733 | 163.4133 | -1.2515 | 5.99E-09 | 1.03E-06 | rihA         |
| LOC_Os05g35010 | 6.0467   | 19.1767  | 1.6651  | 6.29E-09 | 1.08E-06 | CYP71A1      |
| LOC_Os11g35930 | 2.4167   | 0.1000   | -4.5949 | 6.62E-09 | 1.13E-06 | CHS          |
| LOC_Os01g03680 | 5.1833   | 0.1867   | -4.7953 | 6.69E-09 | 1.13E-06 | RBBI3.3      |

|                |          |          |         |          |          |              |
|----------------|----------|----------|---------|----------|----------|--------------|
| LOC_Os04g43290 | 1.3933   | 0.0233   | -5.9000 | 6.95E-09 | 1.17E-06 | ARPC2B       |
| LOC_Os01g53240 | 70.5967  | 8.4633   | -3.0603 | 7.06E-09 | 1.18E-06 | BURP3        |
| LOC_Os05g49240 | 2.8233   | 0.0367   | -6.2668 | 7.23E-09 | 1.20E-06 | RL3          |
| LOC_Os11g06820 | 0.7700   | 0.0467   | -4.0444 | 7.28E-09 | 1.20E-06 | LAX2         |
| LOC_Os08g30080 | 12.5500  | 2.7600   | -2.1849 | 7.74E-09 | 1.27E-06 | At1g06650    |
| LOC_Os07g47830 | 1.9533   | 0.3033   | -2.6870 | 8.51E-09 | 1.39E-06 | -            |
| LOC_Os01g16170 | 11.7233  | 84.9133  | 2.8566  | 8.75E-09 | 1.42E-06 | YPQ1         |
| LOC_Os02g42190 | 4.9033   | 0.2900   | -4.0796 | 8.82E-09 | 1.43E-06 | WAK4         |
| LOC_Os01g71810 | 1.8067   | 0.0533   | -5.0821 | 9.01E-09 | 1.44E-06 | -            |
| LOC_Os01g18744 | 2.0767   | 0.1633   | -3.6684 | 9.03E-09 | 1.44E-06 | TAX10        |
| LOC_Os02g33070 | 95.0700  | 302.3167 | 1.6690  | 9.49E-09 | 1.51E-06 | At2g27730    |
| LOC_Os04g59120 | 0.9467   | 0.0467   | -4.3424 | 9.56E-09 | 1.51E-06 | At1g25270    |
| LOC_Os10g34480 | 52.5100  | 5.8800   | -3.1587 | 1.05E-08 | 1.64E-06 | CYP86B1      |
| LOC_Os02g30100 | 2.4833   | 9.8067   | 1.9815  | 1.05E-08 | 1.64E-06 | CYP81E7      |
| LOC_Os08g07890 | 1.6233   | 0.4333   | -1.9054 | 1.13E-08 | 1.75E-06 | SERK1        |
| LOC_Os05g38420 | 0.6867   | 0.0067   | -6.6865 | 1.13E-08 | 1.75E-06 | LAC12        |
| LOC_Os06g38450 | 34.8267  | 8.2800   | -2.0725 | 1.18E-08 | 1.81E-06 | SAG39        |
| LOC_Os01g12640 | 1.2900   | 0.2267   | -2.5087 | 1.18E-08 | 1.81E-06 | MAKR2        |
| LOC_Os01g52710 | 2.0600   | 0.2600   | -2.9861 | 1.19E-08 | 1.81E-06 | GAUT15       |
| LOC_Os02g54140 | 0.5800   | 3.3767   | 2.5415  | 1.25E-08 | 1.88E-06 | HSP18.6      |
| LOC_Os11g42550 | 186.7533 | 11.9633  | -3.9644 | 1.34E-08 | 2.02E-06 | DIR21        |
| LOC_Os06g05930 | 52.3800  | 4.8633   | -3.4290 | 1.36E-08 | 2.04E-06 | -            |
| LOC_Os09g25850 | 55.0967  | 9.8533   | -2.4833 | 1.42E-08 | 2.11E-06 | CER3         |
| LOC_Os03g61720 | 86.6333  | 5.9333   | -3.8680 | 1.43E-08 | 2.12E-06 | GPAT3        |
| LOC_Os04g32810 | 9.9567   | 0.7200   | -3.7896 | 1.47E-08 | 2.16E-06 | -            |
| LOC_Os05g38530 | 2.7267   | 13.5267  | 2.3106  | 1.55E-08 | 2.28E-06 | HSP70        |
| LOC_Os02g38040 | 0.8933   | 3.6167   | 2.0174  | 1.59E-08 | 2.31E-06 | IRL2         |
| LOC_Os07g44410 | 36.8633  | 197.5233 | 2.4218  | 1.59E-08 | 2.31E-06 | tolB         |
| LOC_Os02g52730 | 1.3600   | 4.3533   | 1.6785  | 1.60E-08 | 2.31E-06 | Os01g0357100 |
| LOC_Os02g15950 | 2.3633   | 8.3000   | 1.8123  | 1.64E-08 | 2.36E-06 | At3g61590    |
| LOC_Os11g19730 | 4.7667   | 0.9667   | -2.3019 | 1.65E-08 | 2.36E-06 | -            |
| LOC_Os08g02030 | 1.2000   | 14.0033  | 3.5447  | 1.73E-08 | 2.45E-06 | At3g50280    |
| LOC_Os03g46060 | 3.9567   | 32.7533  | 3.0493  | 1.75E-08 | 2.47E-06 | tlp          |
| LOC_Os08g38900 | 209.9733 | 43.1133  | -2.2840 | 1.80E-08 | 2.53E-06 | ROMT-15      |
| LOC_Os04g46130 | 4.2267   | 0.4733   | -3.1586 | 1.98E-08 | 2.78E-06 | -            |
| LOC_Os02g50490 | 21.4000  | 4.3400   | -2.3018 | 2.02E-08 | 2.82E-06 | GLU10        |
| LOC_Os08g38170 | 10.0367  | 1.2433   | -3.0130 | 2.03E-08 | 2.82E-06 | guaA         |
| LOC_Os01g21960 | 3.0733   | 0.9000   | -1.7718 | 2.06E-08 | 2.84E-06 | At5g18500    |
| LOC_Os05g10730 | 19.6100  | 54.2767  | 1.4687  | 2.13E-08 | 2.92E-06 | ABCC8        |
| LOC_Os07g03458 | 1.9567   | 0.0567   | -5.1098 | 2.14E-08 | 2.92E-06 | -            |
| LOC_Os08g14570 | 33.6533  | 10.7300  | -1.6491 | 2.17E-08 | 2.95E-06 | CPR          |
| LOC_Os09g31482 | 46.9200  | 131.7667 | 1.4897  | 2.18E-08 | 2.95E-06 | U2AF35A      |
| LOC_Os08g05980 | 1.9667   | 13.4267  | 2.7713  | 2.20E-08 | 2.96E-06 | -            |

|                |          |         |          |          |          |              |
|----------------|----------|---------|----------|----------|----------|--------------|
| LOC_Os07g46930 | 1.6567   | 0.0500  | -5.0502  | 2.21E-08 | 2.96E-06 | -            |
| LOC_Os12g40550 | 23.3333  | 53.8100 | 1.2055   | 2.23E-08 | 2.97E-06 | UAH          |
| LOC_Os01g51570 | 139.2400 | 8.6367  | -4.0110  | 2.25E-08 | 2.99E-06 | -            |
| LOC_Os04g38540 | 4.3300   | 20.3700 | 2.2340   | 2.34E-08 | 3.09E-06 | Galm         |
| LOC_Os01g08380 | 4.6633   | 0.4100  | -3.5077  | 2.39E-08 | 3.13E-06 | TAX10        |
| LOC_Os05g43940 | 1.2900   | 0.0010  | -10.3332 | 2.40E-08 | 3.13E-06 | ZRP4         |
| LOC_Os12g03899 | 9.3967   | 24.7033 | 1.3945   | 2.40E-08 | 3.13E-06 | ZIFL1        |
| LOC_Os12g03150 | 3.2767   | 0.0900  | -5.1862  | 2.56E-08 | 3.33E-06 | MYB306       |
| LOC_Os12g03040 | 0.2900   | 1.6267  | 2.4878   | 2.63E-08 | 3.40E-06 | ONAC010      |
| LOC_Os06g29730 | 19.9867  | 2.6300  | -2.9259  | 2.83E-08 | 3.63E-06 | -            |
| LOC_Os04g43490 | 6.8600   | 2.1233  | -1.6919  | 2.84E-08 | 3.63E-06 | At4g26100    |
| LOC_Os07g32630 | 24.0900  | 2.7567  | -3.1274  | 2.97E-08 | 3.78E-06 | UGT71B7      |
| LOC_Os09g09290 | 0.5267   | 0.1033  | -2.3496  | 3.13E-08 | 3.98E-06 | -            |
| LOC_Os03g25330 | 4.2100   | 0.2867  | -3.8764  | 3.46E-08 | 4.38E-06 | PER2         |
| LOC_Os04g01874 | 0.1733   | 1.4567  | 3.0710   | 3.62E-08 | 4.56E-06 | LECRKS5      |
| LOC_Os05g48270 | 19.0933  | 2.3767  | -3.0061  | 3.69E-08 | 4.60E-06 | At3g61750    |
| LOC_Os01g22560 | 13.1067  | 0.0433  | -8.2406  | 3.69E-08 | 4.60E-06 | GPAT3        |
| LOC_Os02g20540 | 1.8167   | 0.0010  | -10.8271 | 3.86E-08 | 4.78E-06 | FLA6         |
| LOC_Os07g30950 | 2.9000   | 0.7900  | -1.8761  | 3.87E-08 | 4.78E-06 | CYP725A1     |
| LOC_Os05g48850 | 3.8600   | 0.8967  | -2.1060  | 3.96E-08 | 4.88E-06 | NAC073       |
| LOC_Os03g19290 | 3.2833   | 21.1367 | 2.6865   | 4.04E-08 | 4.94E-06 | OEP162       |
| LOC_Os04g30030 | 2.1333   | 0.1633  | -3.7072  | 4.11E-08 | 5.01E-06 | CRK10        |
| LOC_Os05g45180 | 12.4367  | 0.6933  | -4.1649  | 4.36E-08 | 5.30E-06 | RhGT1        |
| LOC_Os01g45730 | 12.0267  | 0.6700  | -4.1659  | 4.52E-08 | 5.46E-06 | Os01g0645000 |
| LOC_Os02g41590 | 56.2233  | 15.6633 | -1.8438  | 4.63E-08 | 5.58E-06 | ADK2         |
| LOC_Os01g11550 | 1.0533   | 0.1333  | -2.9819  | 4.75E-08 | 5.70E-06 | PCF5         |
| LOC_Os01g06580 | 2.5233   | 0.2833  | -3.1548  | 4.90E-08 | 5.86E-06 | FLA11        |
| LOC_Os06g49660 | 3.2667   | 0.8333  | -1.9709  | 4.99E-08 | 5.94E-06 | HSR201       |
| LOC_Os04g03980 | 7.4933   | 2.2567  | -1.7314  | 5.16E-08 | 6.11E-06 | YUC3         |
| LOC_Os06g13720 | 0.9067   | 5.3833  | 2.5699   | 5.40E-08 | 6.36E-06 | Os06g0246500 |
| LOC_Os12g07580 | 12.6567  | 1.3700  | -3.2076  | 5.42E-08 | 6.36E-06 | DIR3         |
| LOC_Os08g05960 | 3.9400   | 24.4667 | 2.6346   | 6.07E-08 | 7.10E-06 | -            |
| LOC_Os06g40180 | 7.0400   | 0.6800  | -3.3720  | 6.45E-08 | 7.51E-06 | PLD2         |
| LOC_Os03g18300 | 2.5433   | 0.3300  | -2.9462  | 6.98E-08 | 8.09E-06 | CHUP1        |
| LOC_Os01g62200 | 28.7367  | 6.3900  | -2.1690  | 7.13E-08 | 8.23E-06 | UFC          |
| LOC_Os09g26660 | 12.1733  | 5.1400  | -1.2439  | 7.15E-08 | 8.23E-06 | RBOHE        |
| LOC_Os04g44354 | 7.3867   | 1.0933  | -2.7562  | 7.40E-08 | 8.48E-06 | UGT82A1      |
| LOC_Os04g51150 | 17.4167  | 61.0900 | 1.8105   | 7.77E-08 | 8.87E-06 | AOX1A        |
| LOC_Os03g61920 | 8.9767   | 21.5667 | 1.2646   | 8.17E-08 | 9.28E-06 | ETF A        |
| LOC_Os10g21272 | 0.0010   | 1.2333  | 10.2683  | 8.30E-08 | 9.40E-06 | -            |
| LOC_Os05g13900 | 1.4200   | 0.0600  | -4.5648  | 8.67E-08 | 9.78E-06 | p200         |
| LOC_Os07g44890 | 21.8133  | 5.9200  | -1.8815  | 8.95E-08 | 1.01E-05 | CXE18        |
| LOC_Os01g09880 | 13.5567  | 1.0333  | -3.7136  | 9.01E-08 | 1.01E-05 | -            |

|                |          |          |         |          |          |           |
|----------------|----------|----------|---------|----------|----------|-----------|
| LOC_Os11g35890 | 1.2100   | 0.2333   | -2.3745 | 9.15E-08 | 1.02E-05 | GSO2      |
| LOC_Os07g03368 | 1.9800   | 0.0667   | -4.8924 | 9.29E-08 | 1.03E-05 | -         |
| LOC_Os02g08100 | 157.1067 | 32.6667  | -2.2659 | 9.34E-08 | 1.03E-05 | 4CL3      |
| LOC_Os04g33390 | 28.6533  | 5.9900   | -2.2581 | 9.59E-08 | 1.06E-05 | ADT6      |
| LOC_Os01g71624 | 9.9600   | 78.0233  | 2.9697  | 1.00E-07 | 1.10E-05 | -         |
| LOC_Os12g04690 | 0.7300   | 0.0300   | -4.6049 | 1.03E-07 | 1.12E-05 | -         |
| LOC_Os06g01360 | 24.3467  | 62.8067  | 1.3672  | 1.04E-07 | 1.14E-05 | HGO       |
| LOC_Os03g28980 | 2.1600   | 0.2100   | -3.3626 | 1.07E-07 | 1.17E-05 | tolB      |
| LOC_Os10g42390 | 8.0067   | 0.9167   | -3.1267 | 1.11E-07 | 1.20E-05 | ATL28     |
| LOC_Os11g15340 | 3.8667   | 12.6667  | 1.7119  | 1.13E-07 | 1.22E-05 | AAMT1     |
| LOC_Os08g38710 | 43.7200  | 264.2833 | 2.5957  | 1.16E-07 | 1.25E-05 | RFS1      |
| LOC_Os01g12280 | 9.6433   | 23.6133  | 1.2920  | 1.18E-07 | 1.26E-05 | -         |
| LOC_Os11g02070 | 4.5800   | 0.6600   | -2.7948 | 1.20E-07 | 1.28E-05 | At3g56230 |
| LOC_Os04g50770 | 7.0100   | 1.0233   | -2.7761 | 1.21E-07 | 1.28E-05 | -         |
| LOC_Os11g19840 | 8.6633   | 32.0033  | 1.8852  | 1.25E-07 | 1.32E-05 | OMT2      |
| LOC_Os02g09490 | 45.7667  | 10.3933  | -2.1386 | 1.26E-07 | 1.32E-05 | CAD2      |
| LOC_Os07g22350 | 33.7933  | 72.4867  | 1.1010  | 1.28E-07 | 1.35E-05 | At5g13110 |
| LOC_Os10g39260 | 1.1300   | 0.0700   | -4.0128 | 1.32E-07 | 1.38E-05 | nep1      |
| LOC_Os05g03610 | 22.7933  | 5.5700   | -2.0329 | 1.33E-07 | 1.39E-05 | PLC2      |
| LOC_Os04g46780 | 14.2100  | 1.2333   | -3.5263 | 1.35E-07 | 1.40E-05 | PVA13     |
| LOC_Os11g39990 | 19.7833  | 4.3000   | -2.2019 | 1.36E-07 | 1.40E-05 | PLP1      |
| LOC_Os01g16180 | 17.5033  | 44.5967  | 1.3493  | 1.38E-07 | 1.42E-05 | EMB1691   |
| LOC_Os01g08780 | 5.6733   | 1.2867   | -2.1406 | 1.45E-07 | 1.49E-05 | IP5P3     |
| LOC_Os11g19864 | 1.7667   | 9.0833   | 2.3622  | 1.47E-07 | 1.51E-05 | GSTT3     |
| LOC_Os06g45710 | 1.7800   | 6.4533   | 1.8582  | 1.53E-07 | 1.56E-05 | -         |
| LOC_Os02g21700 | 9.3300   | 2.0733   | -2.1699 | 1.54E-07 | 1.56E-05 | ANP2      |
| LOC_Os10g33920 | 15.3967  | 5.6633   | -1.4429 | 1.58E-07 | 1.60E-05 | At1g06890 |
| LOC_Os05g05030 | 16.3133  | 2.3233   | -2.8118 | 1.59E-07 | 1.60E-05 | -         |
| LOC_Os04g16970 | 2.1033   | 0.2233   | -3.2354 | 1.64E-07 | 1.65E-05 | rmf12     |
| LOC_Os09g10650 | 0.1467   | 0.0010   | -7.1964 | 1.67E-07 | 1.67E-05 | FAB1B     |
| LOC_Os12g08260 | 38.2100  | 85.6900  | 1.1652  | 1.67E-07 | 1.67E-05 | At5g09300 |
| LOC_Os08g39840 | 30.4200  | 4.2833   | -2.8282 | 1.72E-07 | 1.71E-05 | CM-LOX1   |
| LOC_Os04g07110 | 0.9400   | 0.1000   | -3.2327 | 1.95E-07 | 1.93E-05 | -         |
| LOC_Os04g38220 | 31.7867  | 5.5633   | -2.5144 | 1.99E-07 | 1.96E-05 | STP5      |
| LOC_Os07g14820 | 0.3833   | 0.0010   | -8.5825 | 2.02E-07 | 1.99E-05 | At3g47570 |
| LOC_Os07g01660 | 24.2000  | 5.0667   | -2.2559 | 2.07E-07 | 2.03E-05 | DIR1      |
| LOC_Os10g42190 | 11.4900  | 28.6067  | 1.3160  | 2.08E-07 | 2.03E-05 | IRL5      |
| LOC_Os04g12970 | 1.6100   | 11.0600  | 2.7802  | 2.15E-07 | 2.09E-05 | UGT74E2   |
| LOC_Os01g02930 | 0.6933   | 2.6133   | 1.9143  | 2.17E-07 | 2.10E-05 | pomgnt2   |
| LOC_Os03g02514 | 45.9933  | 15.8400  | -1.5379 | 2.18E-07 | 2.11E-05 | -         |
| LOC_Os07g46950 | 5.8333   | 17.4567  | 1.5814  | 2.23E-07 | 2.15E-05 | -         |
| LOC_Os11g17970 | 9.8433   | 2.3867   | -2.0441 | 2.33E-07 | 2.23E-05 | NPF4.5    |
| MSTRG.10545    | 0.7600   | 10.0000  | 3.7179  | 2.50E-07 | 2.39E-05 | --        |

|                |          |           |         |          |          |              |
|----------------|----------|-----------|---------|----------|----------|--------------|
| LOC_Os06g45184 | 2.2633   | 23.9133   | 3.4013  | 2.55E-07 | 2.42E-05 | -            |
| LOC_Os07g43070 | 15.0200  | 3.2967    | -2.1878 | 2.56E-07 | 2.42E-05 | -            |
| LOC_Os01g68740 | 11.8267  | 3.0233    | -1.9678 | 2.56E-07 | 2.42E-05 | -            |
| LOC_Os09g02180 | 2.1400   | 17.2167   | 3.0081  | 2.62E-07 | 2.48E-05 | -            |
| LOC_Os02g14840 | 4.2433   | 1.2700    | -1.7404 | 2.64E-07 | 2.48E-05 | Os02g0245800 |
| LOC_Os06g49680 | 4.7100   | 12.4633   | 1.4039  | 2.71E-07 | 2.54E-05 | -            |
| LOC_Os11g32650 | 253.4500 | 40.0067   | -2.6634 | 2.72E-07 | 2.54E-05 | CHS1         |
| LOC_Os12g02030 | 2.1900   | 0.4400    | -2.3154 | 2.75E-07 | 2.56E-05 | At3g56230    |
| LOC_Os08g42990 | 0.1900   | 1.7567    | 3.2088  | 2.81E-07 | 2.61E-05 | -            |
| LOC_Os02g52840 | 2.8600   | 0.2933    | -3.2854 | 2.87E-07 | 2.65E-05 | FL           |
| LOC_Os05g08370 | 54.4933  | 21.6567   | -1.3313 | 2.87E-07 | 2.65E-05 | CESA1        |
| LOC_Os02g54060 | 12.6100  | 1.7333    | -2.8629 | 2.91E-07 | 2.67E-05 | CPN21        |
| LOC_Os07g02970 | 2.3167   | 0.2667    | -3.1189 | 2.94E-07 | 2.70E-05 | -            |
| LOC_Os07g41060 | 2.4400   | 0.1800    | -3.7608 | 3.01E-07 | 2.75E-05 | DFR          |
| LOC_Os12g43440 | 13.5200  | 53.3633   | 1.9808  | 3.02E-07 | 2.75E-05 | Os12g0628600 |
| LOC_Os06g09920 | 3.5033   | 14.0400   | 2.0027  | 3.03E-07 | 2.75E-05 | -            |
| LOC_Os02g48870 | 22.4133  | 3.5567    | -2.6558 | 3.09E-07 | 2.79E-05 | ASPG1        |
| LOC_Os04g35890 | 3.6133   | 0.4900    | -2.8825 | 3.24E-07 | 2.92E-05 | CCR4         |
| LOC_Os10g23820 | 9.6333   | 1.2600    | -2.9346 | 3.30E-07 | 2.96E-05 | ACT-1        |
| LOC_Os04g58870 | 1.2067   | 7.2633    | 2.5896  | 3.33E-07 | 2.98E-05 | EXO70A1      |
| LOC_Os09g38239 | 40.9500  | 5.3633    | -2.9327 | 3.34E-07 | 2.98E-05 | SOT5         |
| LOC_Os02g12380 | 5.7367   | 17.5833   | 1.6159  | 3.40E-07 | 3.02E-05 | -            |
| LOC_Os02g43194 | 18.3833  | 1.2933    | -3.8292 | 3.50E-07 | 3.11E-05 | ALDH3F1      |
| LOC_Os04g39980 | 15.3033  | 73.9100   | 2.2719  | 3.55E-07 | 3.14E-05 | DAO          |
| LOC_Os01g25484 | 899.1667 | 2085.6900 | 1.2139  | 3.58E-07 | 3.16E-05 | Os01g0357100 |
| LOC_Os09g26960 | 43.0800  | 4.4367    | -3.2795 | 3.61E-07 | 3.17E-05 | CYP75B1      |
| LOC_Os01g45110 | 1.1800   | 5.4667    | 2.2119  | 3.64E-07 | 3.19E-05 | TOGT1        |
| LOC_Os05g36990 | 3.3567   | 0.3700    | -3.1814 | 3.65E-07 | 3.19E-05 | OFP13        |
| LOC_Os05g11990 | 15.9167  | 3.6733    | -2.1154 | 3.83E-07 | 3.34E-05 | TTL1         |
| LOC_Os05g06780 | 22.2267  | 3.0233    | -2.8781 | 3.87E-07 | 3.36E-05 | -            |
| LOC_Os06g48300 | 3.7833   | 15.9933   | 2.0797  | 3.93E-07 | 3.40E-05 | Os06g0698300 |
| LOC_Os01g33160 | 2.1233   | 0.0500    | -5.4083 | 3.94E-07 | 3.40E-05 | At3g17210    |
| LOC_Os04g56990 | 35.6833  | 115.3300  | 1.6924  | 4.01E-07 | 3.45E-05 | PHL1         |
| LOC_Os11g42500 | 272.6533 | 23.6000   | -3.5302 | 4.05E-07 | 3.48E-05 | DIR1         |
| LOC_Os03g63970 | 7.2400   | 17.1533   | 1.2444  | 4.08E-07 | 3.49E-05 | 20ox1        |
| LOC_Os12g32760 | 0.7733   | 8.0133    | 3.3732  | 4.19E-07 | 3.57E-05 | PLT5         |
| LOC_Os08g35760 | 69.3567  | 10.7300   | -2.6924 | 4.22E-07 | 3.59E-05 | GER5         |
| LOC_Os04g28780 | 0.6267   | 0.0533    | -3.5546 | 4.30E-07 | 3.64E-05 | At2g19130    |
| LOC_Os04g58860 | 18.8767  | 5.7933    | -1.7041 | 4.31E-07 | 3.64E-05 | -            |
| LOC_Os10g39130 | 59.8000  | 23.8533   | -1.3260 | 4.38E-07 | 3.69E-05 | MADS56       |
| LOC_Os10g05970 | 9.0233   | 0.0267    | -8.4025 | 4.46E-07 | 3.74E-05 | PRP4         |
| LOC_Os01g41730 | 1.7700   | 0.3800    | -2.2197 | 4.47E-07 | 3.74E-05 | At2g42960    |
| LOC_Os02g41670 | 2.2800   | 0.0800    | -4.8329 | 4.69E-07 | 3.91E-05 | ZB8          |

|                |          |          |          |          |          |              |
|----------------|----------|----------|----------|----------|----------|--------------|
| LOC_Os01g68598 | 1.5667   | 0.2433   | -2.6867  | 4.74E-07 | 3.94E-05 | EPFL9        |
| LOC_Os06g13830 | 7.8667   | 1.2133   | -2.6968  | 5.19E-07 | 4.31E-05 | Os06g0247900 |
| LOC_Os02g22380 | 44.7967  | 18.8567  | -1.2483  | 5.55E-07 | 4.59E-05 | pomgnt2      |
| LOC_Os01g11730 | 0.4867   | 0.0010   | -8.9268  | 5.57E-07 | 4.60E-05 | At5g45910    |
| LOC_Os01g55050 | 31.9833  | 11.9500  | -1.4203  | 5.79E-07 | 4.76E-05 | -            |
| LOC_Os11g03300 | 0.3733   | 1.6900   | 2.1785   | 6.17E-07 | 5.06E-05 | ONAC010      |
| LOC_Os01g51840 | 5.1667   | 0.7067   | -2.8701  | 6.22E-07 | 5.09E-05 | IQD31        |
| LOC_Os07g45060 | 31.5633  | 6.0933   | -2.3729  | 6.47E-07 | 5.28E-05 | At3g06035    |
| LOC_Os01g73790 | 5.2100   | 2.2833   | -1.1901  | 6.54E-07 | 5.31E-05 | Os01g0969100 |
| LOC_Os03g43650 | 15.4567  | 2.1500   | -2.8458  | 6.55E-07 | 5.31E-05 | LRX6         |
| LOC_Os03g56900 | 18.3100  | 6.1200   | -1.5810  | 6.70E-07 | 5.42E-05 | RTNLB8       |
| LOC_Os01g42790 | 3.8867   | 0.8267   | -2.2332  | 6.75E-07 | 5.44E-05 | SAG39        |
| LOC_Os01g62290 | 2.5233   | 9.1867   | 1.8642   | 6.77E-07 | 5.45E-05 | HSP70        |
| LOC_Os09g07130 | 3.0833   | 0.3900   | -2.9829  | 6.82E-07 | 5.47E-05 | -            |
| LOC_Os01g16714 | 6.9433   | 0.5300   | -3.7116  | 7.18E-07 | 5.74E-05 | YUC10        |
| LOC_Os09g37180 | 0.6833   | 0.1167   | -2.5502  | 7.29E-07 | 5.81E-05 | ACT-2        |
| LOC_Os06g11400 | 6.7933   | 1.8833   | -1.8508  | 7.37E-07 | 5.86E-05 | CURT1D       |
| LOC_Os01g12820 | 0.3700   | 2.8900   | 2.9655   | 7.42E-07 | 5.88E-05 | -            |
| LOC_Os07g44440 | 6.7000   | 35.8233  | 2.4187   | 7.45E-07 | 5.89E-05 | Os07g0638400 |
| LOC_Os11g03230 | 4.5633   | 1.1033   | -2.0482  | 7.76E-07 | 6.12E-05 | APY3         |
| LOC_Os03g38800 | 0.5733   | 0.0633   | -3.1783  | 7.86E-07 | 6.18E-05 | SPAC644.07   |
| LOC_Os03g18980 | 4.2267   | 0.6500   | -2.7010  | 8.02E-07 | 6.28E-05 | ATK4         |
| LOC_Os01g06310 | 1.1567   | 10.3000  | 3.1546   | 8.22E-07 | 6.43E-05 | -            |
| LOC_Os02g56370 | 3.9800   | 0.2400   | -4.0517  | 8.41E-07 | 6.56E-05 | WAK5         |
| LOC_Os06g30950 | 14.8433  | 3.2533   | -2.1898  | 8.48E-07 | 6.59E-05 | At1g06890    |
| LOC_Os07g44280 | 1.2633   | 0.0333   | -5.2441  | 8.55E-07 | 6.63E-05 | DIR5         |
| LOC_Os09g25070 | 13.1400  | 0.8600   | -3.9335  | 8.60E-07 | 6.65E-05 | WRKY40       |
| LOC_Os04g32830 | 1.2767   | 0.0010   | -10.3182 | 8.71E-07 | 6.71E-05 | -            |
| LOC_Os02g43740 | 2.9467   | 1.0067   | -1.5495  | 8.83E-07 | 6.79E-05 | D6PKL2       |
| LOC_Os01g15320 | 2.7800   | 0.5200   | -2.4185  | 8.93E-07 | 6.85E-05 | RALFL33      |
| LOC_Os02g54254 | 7.8867   | 33.6833  | 2.0945   | 9.06E-07 | 6.92E-05 | LKR/SDH      |
| LOC_Os08g41880 | 37.5467  | 9.6633   | -1.9581  | 9.07E-07 | 6.92E-05 | PAP27        |
| LOC_Os01g22010 | 387.0033 | 135.2100 | -1.5171  | 9.10E-07 | 6.92E-05 | SAM2         |
| LOC_Os06g34120 | 37.4833  | 14.2333  | -1.3970  | 9.20E-07 | 6.98E-05 | At5g45910    |
| LOC_Os03g08624 | 5.9433   | 37.0800  | 2.6413   | 9.39E-07 | 7.11E-05 | Rv1106c      |
| LOC_Os11g47560 | 0.6467   | 5.1067   | 2.9813   | 9.75E-07 | 7.36E-05 | Chib3H-h     |
| LOC_Os04g15920 | 7.0333   | 0.3900   | -4.1727  | 9.84E-07 | 7.40E-05 | CAD6         |
| LOC_Os10g37210 | 16.0367  | 38.0033  | 1.2448   | 9.98E-07 | 7.49E-05 | Os10g0516300 |
| LOC_Os05g04380 | 85.8167  | 19.1133  | -2.1667  | 1.01E-06 | 7.57E-05 | PER2         |
| LOC_Os03g13820 | 17.3767  | 8.2233   | -1.0794  | 1.02E-06 | 7.64E-05 | At5g57670    |
| LOC_Os04g51880 | 89.7833  | 201.8933 | 1.1691   | 1.08E-06 | 8.02E-05 | GALAK        |
| LOC_Os01g68050 | 6.8133   | 0.7700   | -3.1454  | 1.08E-06 | 8.02E-05 | PROT1        |
| LOC_Os05g47650 | 5.3400   | 17.0533  | 1.6751   | 1.10E-06 | 8.14E-05 | Os05g0549800 |

|                |         |          |         |          |          |              |
|----------------|---------|----------|---------|----------|----------|--------------|
| LOC_Os05g05680 | 56.5300 | 15.0300  | -1.9112 | 1.11E-06 | 8.22E-05 | MAO1B        |
| LOC_Os05g42000 | 16.6367 | 3.8133   | -2.1252 | 1.13E-06 | 8.32E-05 | PER3         |
| LOC_Os11g26760 | 8.6767  | 29.2900  | 1.7552  | 1.15E-06 | 8.43E-05 | RAB16C       |
| LOC_Os03g14590 | 45.4667 | 22.0000  | -1.0473 | 1.15E-06 | 8.43E-05 | -            |
| LOC_Os06g38830 | 0.6867  | 0.1267   | -2.4386 | 1.17E-06 | 8.59E-05 | At3g47570    |
| LOC_Os01g59840 | 21.2033 | 7.5400   | -1.4917 | 1.18E-06 | 8.60E-05 | BGLU3        |
| LOC_Os02g13800 | 1.1600  | 3.8367   | 1.7257  | 1.19E-06 | 8.64E-05 | HSFC2A       |
| LOC_Os02g52490 | 1.4100  | 0.1067   | -3.7245 | 1.19E-06 | 8.64E-05 | -            |
| LOC_Os09g26980 | 2.3267  | 0.7967   | -1.5462 | 1.21E-06 | 8.77E-05 | CYP75B1      |
| LOC_Os07g42430 | 0.9367  | 0.0010   | -9.8714 | 1.22E-06 | 8.77E-05 | GLO4         |
| LOC_Os03g21710 | 2.5300  | 0.2833   | -3.1586 | 1.23E-06 | 8.86E-05 | WRKY70       |
| LOC_Os08g41860 | 15.0233 | 2.6733   | -2.4905 | 1.24E-06 | 8.93E-05 | -            |
| LOC_Os01g44050 | 17.3667 | 54.5600  | 1.6515  | 1.25E-06 | 8.96E-05 | cysG2        |
| LOC_Os11g26790 | 32.7233 | 275.2533 | 3.0724  | 1.26E-06 | 9.02E-05 | RAB21        |
| LOC_Os05g07810 | 1.2933  | 7.0833   | 2.4533  | 1.27E-06 | 9.02E-05 | At3g01520    |
| LOC_Os02g48470 | 73.4233 | 26.5433  | -1.4679 | 1.27E-06 | 9.02E-05 | -            |
| LOC_Os06g38340 | 4.4967  | 0.9967   | -2.1737 | 1.28E-06 | 9.10E-05 | At3g47570    |
| LOC_Os03g19250 | 69.1133 | 158.2433 | 1.1951  | 1.37E-06 | 9.67E-05 | AAE7         |
| LOC_Os03g60580 | 31.3467 | 141.6433 | 2.1759  | 1.39E-06 | 9.78E-05 | ADF3         |
| LOC_Os04g56060 | 1.4267  | 0.2933   | -2.2820 | 1.39E-06 | 9.78E-05 | At5g57670    |
| LOC_Os01g02780 | 6.7633  | 2.2267   | -1.6028 | 1.41E-06 | 9.88E-05 | At1g67000    |
| LOC_Os01g59150 | 22.8500 | 4.9600   | -2.2038 | 1.41E-06 | 9.90E-05 | TUBB4        |
| LOC_Os06g36380 | 3.5167  | 15.3500  | 2.1260  | 1.42E-06 | 9.90E-05 | -            |
| LOC_Os03g27480 | 2.0400  | 0.1967   | -3.3747 | 1.47E-06 | 0.0001   | SCPL51       |
| LOC_Os01g27190 | 0.0010  | 0.6733   | 9.3952  | 1.49E-06 | 0.0001   | -            |
| LOC_Os04g02900 | 67.3200 | 149.3500 | 1.1496  | 1.51E-06 | 0.0001   | Os04g0119400 |
| LOC_Os02g43170 | 50.9633 | 24.6100  | -1.0502 | 1.52E-06 | 0.0001   | BBX21        |
| LOC_Os07g32620 | 33.3300 | 6.4933   | -2.3598 | 1.59E-06 | 0.00011  | RhGT1        |
| LOC_Os01g55610 | 0.8000  | 0.1233   | -2.6974 | 1.60E-06 | 0.00011  | NPF1.2       |
| LOC_Os02g37654 | 17.7367 | 3.7800   | -2.2303 | 1.64E-06 | 0.00011  | Os03g0232800 |
| LOC_Os02g53200 | 15.8100 | 5.3200   | -1.5713 | 1.64E-06 | 0.00011  | At5g56590    |
| LOC_Os06g19530 | 6.8633  | 1.0100   | -2.7646 | 1.66E-06 | 0.00011  | KCR1         |
| LOC_Os06g20920 | 2.8633  | 0.4800   | -2.5766 | 1.68E-06 | 0.00011  | AAMT1        |
| LOC_Os05g41990 | 0.5267  | 0.0010   | -9.0407 | 1.68E-06 | 0.00011  | PRX74        |
| LOC_Os06g20200 | 38.5200 | 97.1367  | 1.3344  | 1.70E-06 | 0.00012  | CXE18        |
| LOC_Os01g70200 | 23.6733 | 7.1767   | -1.7219 | 1.73E-06 | 0.00012  | Os01g0926700 |
| LOC_Os05g27000 | 1.5167  | 0.1333   | -3.5078 | 1.75E-06 | 0.00012  | -            |
| LOC_Os04g58030 | 0.7267  | 3.9767   | 2.4522  | 1.78E-06 | 0.00012  | -            |
| LOC_Os08g26220 | 2.3667  | 0.1300   | -4.1863 | 1.84E-06 | 0.00012  | -            |
| LOC_Os03g40670 | 12.3033 | 1.9833   | -2.6331 | 1.86E-06 | 0.00012  | GDPD6        |
| LOC_Os10g34770 | 2.2767  | 14.2400  | 2.6450  | 1.88E-06 | 0.00013  | grip22       |
| LOC_Os09g27910 | 0.4167  | 0.0010   | -8.7027 | 1.92E-06 | 0.00013  | nep1         |
| LOC_Os03g32460 | 0.4433  | 0.0010   | -8.7922 | 1.93E-06 | 0.00013  | -            |

|                |         |         |         |          |         |              |
|----------------|---------|---------|---------|----------|---------|--------------|
| LOC_Os06g12290 | 0.2533  | 1.9333  | 2.9320  | 1.94E-06 | 0.00013 | GSTU10       |
| LOC_Os04g39300 | 1.4067  | 0.0667  | -4.3992 | 1.94E-06 | 0.00013 | -            |
| LOC_Os12g27220 | 20.6567 | 2.5400  | -3.0237 | 1.95E-06 | 0.00013 | HSR201       |
| LOC_Os03g62330 | 1.0467  | 3.4867  | 1.7360  | 2.02E-06 | 0.00013 | -            |
| LOC_Os04g55670 | 27.4367 | 8.7367  | -1.6510 | 2.04E-06 | 0.00013 | Os04g0650300 |
| LOC_Os02g18990 | 2.7533  | 0.3133  | -3.1354 | 2.06E-06 | 0.00014 | At5g41890    |
| LOC_Os04g53760 | 14.2300 | 1.7633  | -3.0126 | 2.08E-06 | 0.00014 | ATK5         |
| LOC_Os02g26210 | 26.6400 | 8.1300  | -1.7123 | 2.12E-06 | 0.00014 | Os02g0460200 |
| LOC_Os11g12300 | 1.5833  | 0.1433  | -3.4655 | 2.13E-06 | 0.00014 | RPM1         |
| LOC_Os05g01140 | 1.2467  | 0.0533  | -4.5469 | 2.15E-06 | 0.00014 | SAMT         |
| LOC_Os11g04660 | 4.9567  | 1.1133  | -2.1545 | 2.17E-06 | 0.00014 | SSL10        |
| LOC_Os08g33740 | 4.1233  | 0.7967  | -2.3718 | 2.20E-06 | 0.00014 | CSLA11       |
| LOC_Os06g46900 | 2.2067  | 6.2233  | 1.4958  | 2.23E-06 | 0.00014 | comA         |
| LOC_Os05g33140 | 3.0300  | 0.8533  | -1.8281 | 2.37E-06 | 0.00015 | Chr9         |
| LOC_Os07g03730 | 12.1267 | 1.4733  | -3.0410 | 2.38E-06 | 0.00015 | -            |
| LOC_Os03g49830 | 6.2100  | 2.0533  | -1.5966 | 2.45E-06 | 0.00016 | At5g22090    |
| LOC_Os11g47120 | 10.0267 | 2.8167  | -1.8318 | 2.46E-06 | 0.00016 | ACLA-1       |
| LOC_Os09g29540 | 3.8033  | 0.7133  | -2.4146 | 2.48E-06 | 0.00016 | WAK5         |
| LOC_Os01g01840 | 8.9233  | 0.9300  | -3.2623 | 2.50E-06 | 0.00016 | -            |
| LOC_Os07g30760 | 11.8500 | 3.3867  | -1.8069 | 2.51E-06 | 0.00016 | UGT709C2     |
| LOC_Os10g41660 | 0.4433  | 2.5200  | 2.5070  | 2.58E-06 | 0.00016 | ATL46        |
| LOC_Os04g11970 | 0.6233  | 0.0010  | -9.2839 | 2.60E-06 | 0.00016 | OMT3         |
| LOC_Os02g48770 | 4.2333  | 0.2867  | -3.8843 | 2.63E-06 | 0.00017 | AAMT1        |
| LOC_Os01g66760 | 6.7167  | 0.7733  | -3.1186 | 2.70E-06 | 0.00017 | At5g48380    |
| LOC_Os06g43780 | 0.9167  | 0.1033  | -3.1491 | 2.77E-06 | 0.00017 | -            |
| LOC_Os08g14000 | 66.5200 | 14.4033 | -2.2074 | 2.84E-06 | 0.00018 | -            |
| LOC_Os06g50930 | 16.1333 | 43.3300 | 1.4253  | 2.89E-06 | 0.00018 | STR15        |
| LOC_Os08g40180 | 1.5533  | 0.1767  | -3.1363 | 2.89E-06 | 0.00018 | HMG3         |
| LOC_Os06g09240 | 2.2367  | 0.4367  | -2.3567 | 2.93E-06 | 0.00018 | BZ1          |
| LOC_Os04g39360 | 6.0167  | 0.1700  | -5.1454 | 2.94E-06 | 0.00018 | -            |
| LOC_Os01g04300 | 7.4033  | 1.2100  | -2.6132 | 2.98E-06 | 0.00018 | XYL2         |
| LOC_Os12g12080 | 2.7700  | 26.0867 | 3.2354  | 2.98E-06 | 0.00018 | -            |
| LOC_Os12g37350 | 68.1367 | 21.6467 | -1.6543 | 2.98E-06 | 0.00018 | LOX2.2       |
| LOC_Os01g39020 | 1.1467  | 5.0767  | 2.1464  | 3.03E-06 | 0.00019 | HSFA6B       |
| LOC_Os07g39750 | 2.7233  | 0.6000  | -2.1823 | 3.05E-06 | 0.00019 | At3g26430    |
| LOC_Os02g11700 | 1.9867  | 0.0900  | -4.4643 | 3.29E-06 | 0.0002  | UGT73C1      |
| LOC_Os01g50200 | 8.7600  | 2.8433  | -1.6233 | 3.32E-06 | 0.0002  | RhGT1        |
| LOC_Os01g50720 | 4.2267  | 0.4667  | -3.1791 | 3.33E-06 | 0.0002  | MYB2         |
| LOC_Os11g10510 | 0.2000  | 1.1767  | 2.5566  | 3.36E-06 | 0.0002  | ADH2         |
| LOC_Os10g38340 | 10.4067 | 47.9267 | 2.2033  | 3.38E-06 | 0.00021 | GSTU6        |
| LOC_Os02g47390 | 0.8167  | 7.2967  | 3.1594  | 3.43E-06 | 0.00021 | -            |
| LOC_Os11g10520 | 0.8733  | 0.0200  | -5.4485 | 3.48E-06 | 0.00021 | ADH2         |
| LOC_Os02g58390 | 0.7833  | 0.0300  | -4.7066 | 3.49E-06 | 0.00021 | At1g60630    |



|                |          |          |         |          |         |              |
|----------------|----------|----------|---------|----------|---------|--------------|
| LOC_Os12g41060 | 0.6067   | 0.0933   | -2.7004 | 3.51E-06 | 0.00021 | EREBP1       |
| MSTRG.17789    | 0.0767   | 1.3233   | 4.1094  | 3.55E-06 | 0.00021 | --           |
| LOC_Os11g18366 | 8.5467   | 2.7200   | -1.6518 | 3.67E-06 | 0.00022 | Os11g0285000 |
| LOC_Os02g40260 | 0.9167   | 0.0033   | -8.1033 | 3.73E-06 | 0.00022 | LRX3         |
| LOC_Os03g02040 | 33.0833  | 5.5300   | -2.5808 | 3.74E-06 | 0.00022 | -            |
| LOC_Os06g02780 | 32.0367  | 4.6933   | -2.7710 | 3.81E-06 | 0.00023 | ASPG2        |
| LOC_Os08g05780 | 0.2933   | 1.7933   | 2.6120  | 3.84E-06 | 0.00023 | -            |
| LOC_Os07g04020 | 2.9267   | 0.7300   | -2.0033 | 3.84E-06 | 0.00023 | EPFL2        |
| LOC_Os03g50970 | 2.0100   | 0.2867   | -2.8097 | 3.85E-06 | 0.00023 | MAP65-6      |
| LOC_Os09g26920 | 1.3967   | 0.3533   | -1.9829 | 3.95E-06 | 0.00023 | SBT1.7       |
| LOC_Os05g06720 | 11.7433  | 3.5100   | -1.7423 | 4.11E-06 | 0.00024 | At1g09390    |
| LOC_Os10g38470 | 7.5933   | 21.3667  | 1.4926  | 4.14E-06 | 0.00024 | GSTU6        |
| LOC_Os08g01830 | 4.5367   | 1.4300   | -1.6656 | 4.18E-06 | 0.00025 | CCR4         |
| LOC_Os01g45990 | 12.0567  | 3.4500   | -1.8052 | 4.27E-06 | 0.00025 | AKT1         |
| LOC_Os08g38580 | 1.3400   | 0.2733   | -2.2935 | 4.39E-06 | 0.00026 | -            |
| LOC_Os06g17390 | 11.8000  | 2.1533   | -2.4541 | 4.43E-06 | 0.00026 | At1g04910    |
| LOC_Os01g09460 | 1.2267   | 4.1767   | 1.7676  | 4.54E-06 | 0.00026 | HXK8         |
| LOC_Os09g26370 | 27.4567  | 10.2900  | -1.4159 | 4.55E-06 | 0.00026 | -            |
| LOC_Os07g42960 | 154.7467 | 49.3600  | -1.6485 | 4.57E-06 | 0.00026 | DAHPS2       |
| LOC_Os09g13650 | 48.3467  | 4.0100   | -3.5917 | 4.62E-06 | 0.00027 | TPX2         |
| LOC_Os05g27790 | 9.0967   | 34.9000  | 1.9398  | 4.65E-06 | 0.00027 | Os05g0344400 |
| LOC_Os05g10370 | 27.0900  | 5.2700   | -2.3619 | 4.73E-06 | 0.00027 | APS1         |
| LOC_Os11g29400 | 34.9233  | 103.0067 | 1.5605  | 4.94E-06 | 0.00028 | G6PGH2       |
| LOC_Os02g05610 | 0.3700   | 1.5467   | 2.0636  | 4.96E-06 | 0.00028 | SE           |
| LOC_Os01g63880 | 4.2833   | 1.4467   | -1.5660 | 5.04E-06 | 0.00029 | -            |
| LOC_Os12g37260 | 152.2767 | 44.1433  | -1.7864 | 5.08E-06 | 0.00029 | LOX2.1       |
| LOC_Os03g19220 | 13.0167  | 2.8833   | -2.1746 | 5.09E-06 | 0.00029 | -            |
| LOC_Os09g03939 | 14.4800  | 3.5400   | -2.0322 | 5.12E-06 | 0.00029 | ABCG11       |
| LOC_Os07g09190 | 10.0467  | 1.1567   | -3.1187 | 5.38E-06 | 0.00031 | Os07g0190000 |
| LOC_Os11g45990 | 0.4500   | 0.0010   | -8.8138 | 5.42E-06 | 0.00031 | -            |
| LOC_Os10g38360 | 28.4767  | 102.6533 | 1.8499  | 5.45E-06 | 0.00031 | GSTU6        |
| LOC_Os03g04310 | 0.7533   | 0.0433   | -4.1197 | 5.48E-06 | 0.00031 | BHLH93       |
| LOC_Os05g05040 | 27.9367  | 5.8867   | -2.2466 | 5.57E-06 | 0.00031 | -            |
| LOC_Os12g06100 | 38.9600  | 81.5833  | 1.0663  | 5.59E-06 | 0.00031 | TLDC1        |
| LOC_Os07g34260 | 64.2700  | 0.7200   | -6.4800 | 5.72E-06 | 0.00032 | Os07g0271500 |
| LOC_Os08g35750 | 9.8200   | 2.0933   | -2.2299 | 5.72E-06 | 0.00032 | Os08g0459700 |
| LOC_Os11g42230 | 0.7600   | 0.0533   | -3.8329 | 5.89E-06 | 0.00033 | At4g26340    |
| LOC_Os05g04820 | 4.4100   | 1.2200   | -1.8539 | 5.95E-06 | 0.00033 | MYB86        |
| LOC_Os02g02840 | 14.2333  | 5.6500   | -1.3330 | 6.17E-06 | 0.00034 | RAC6         |
| LOC_Os12g41740 | 0.6567   | 0.0010   | -9.3590 | 6.24E-06 | 0.00035 | -            |
| LOC_Os02g43280 | 65.0967  | 17.2200  | -1.9185 | 6.31E-06 | 0.00035 | ALDH3F1      |
| LOC_Os12g32590 | 1.0067   | 2.7800   | 1.4655  | 6.41E-06 | 0.00035 | RPM1         |
| LOC_Os05g39770 | 2.5100   | 12.0867  | 2.2677  | 6.72E-06 | 0.00037 | At3g08860    |

|                |          |          |         |          |         |              |
|----------------|----------|----------|---------|----------|---------|--------------|
| LOC_Os09g33710 | 7.9567   | 1.1100   | -2.8416 | 6.82E-06 | 0.00038 | BGLU33       |
| LOC_Os07g06680 | 44.4133  | 15.8000  | -1.4911 | 6.87E-06 | 0.00038 | FLA16        |
| LOC_Os03g40194 | 3.9467   | 11.2933  | 1.5168  | 6.91E-06 | 0.00038 | RGA2         |
| LOC_Os02g37830 | 56.2267  | 19.0500  | -1.5615 | 6.92E-06 | 0.00038 | NEK6         |
| LOC_Os03g25550 | 0.8567   | 0.0400   | -4.4207 | 7.22E-06 | 0.00039 | MYB86        |
| LOC_Os04g31460 | 1.5633   | 0.1833   | -3.0921 | 7.28E-06 | 0.0004  | -            |
| LOC_Os10g11270 | 1.6233   | 0.0567   | -4.8403 | 7.45E-06 | 0.00041 | SOT5         |
| LOC_Os03g30830 | 3.6833   | 0.9400   | -1.9703 | 7.46E-06 | 0.00041 | PDCB3        |
| LOC_Os05g16430 | 3.9767   | 14.7600  | 1.8921  | 7.48E-06 | 0.00041 | At1g56130    |
| LOC_Os07g41280 | 61.7100  | 148.4400 | 1.2663  | 7.64E-06 | 0.00041 | Os07g0604000 |
| LOC_Os12g18530 | 0.2133   | 0.8900   | 2.0607  | 7.70E-06 | 0.00042 | -            |
| LOC_Os06g34960 | 1.8767   | 0.3533   | -2.4091 | 7.70E-06 | 0.00042 | At1g67520    |
| LOC_Os06g11990 | 15.8400  | 7.8600   | -1.0110 | 7.84E-06 | 0.00042 | -            |
| LOC_Os02g17330 | 36.6233  | 80.5067  | 1.1363  | 8.11E-06 | 0.00044 | DAAT         |
| LOC_Os03g44710 | 9.7600   | 3.3267   | -1.5528 | 8.26E-06 | 0.00044 | YAB2         |
| LOC_Os06g18780 | 3.0333   | 0.6367   | -2.2523 | 8.47E-06 | 0.00045 | -            |
| LOC_Os12g42070 | 6.3467   | 2.9367   | -1.1118 | 8.48E-06 | 0.00045 | WAK2         |
| LOC_Os07g03279 | 0.9400   | 0.0300   | -4.9696 | 8.52E-06 | 0.00045 | -            |
| LOC_Os12g38400 | 9.2600   | 1.8900   | -2.2926 | 8.56E-06 | 0.00046 | RS2          |
| LOC_Os05g03460 | 1.0267   | 3.0233   | 1.5582  | 8.63E-06 | 0.00046 | At3g07070    |
| LOC_Os01g58640 | 1.0533   | 4.0200   | 1.9322  | 8.80E-06 | 0.00047 | PAP27        |
| LOC_Os03g21740 | 11.1233  | 26.4567  | 1.2500  | 8.82E-06 | 0.00047 | TWN2         |
| LOC_Os05g49140 | 42.5733  | 7.1933   | -2.5652 | 8.89E-06 | 0.00047 | MPK7         |
| LOC_Os12g25660 | 10.9533  | 0.9867   | -3.4727 | 8.93E-06 | 0.00047 | CYP94B3      |
| LOC_Os09g38020 | 173.1567 | 406.2800 | 1.2304  | 9.03E-06 | 0.00048 | -            |
| LOC_Os10g37710 | 3.3400   | 0.7367   | -2.1808 | 9.25E-06 | 0.00049 | -            |
| LOC_Os01g19610 | 9.5100   | 3.8433   | -1.3071 | 9.29E-06 | 0.00049 | At3g47200    |
| LOC_Os02g41680 | 8.4167   | 2.5100   | -1.7456 | 9.44E-06 | 0.00049 | ZB8          |
| LOC_Os10g37660 | 1.1533   | 5.5467   | 2.2658  | 9.46E-06 | 0.00049 | Os10g0521000 |
| LOC_Os01g51980 | 50.0200  | 10.8433  | -2.2057 | 9.59E-06 | 0.0005  | TAR4         |
| LOC_Os07g25800 | 0.8267   | 4.5167   | 2.4499  | 9.69E-06 | 0.0005  | At2g05970    |
| LOC_Os05g02820 | 4.8233   | 1.1133   | -2.1151 | 9.71E-06 | 0.0005  | At5g16730    |
| LOC_Os06g04920 | 4.0967   | 0.4667   | -3.1340 | 9.77E-06 | 0.00051 | SPAC17H9.04c |
| LOC_Os11g02350 | 9.1900   | 0.5733   | -4.0026 | 1.00E-05 | 0.00052 | LTP110-A     |
| LOC_Os10g25780 | 7.0400   | 18.0000  | 1.3543  | 1.02E-05 | 0.00053 | DIM          |
| LOC_Os06g36040 | 1.6167   | 0.1033   | -3.9676 | 1.05E-05 | 0.00054 | -            |
| LOC_Os03g04220 | 0.4833   | 0.0010   | -8.9169 | 1.06E-05 | 0.00055 | GSTF11       |
| LOC_Os05g35050 | 0.0100   | 0.8933   | 6.4811  | 1.07E-05 | 0.00055 | COPT2        |
| LOC_Os01g52130 | 1.3100   | 0.1633   | -3.0037 | 1.07E-05 | 0.00055 | SULTR3;5     |
| LOC_Os03g55070 | 148.8767 | 36.5000  | -2.0281 | 1.07E-05 | 0.00055 | UGD3         |
| LOC_Os04g06500 | 0.4100   | 0.0067   | -5.9425 | 1.15E-05 | 0.00059 | -            |
| LOC_Os10g26110 | 1.5333   | 0.0433   | -5.1451 | 1.16E-05 | 0.00059 | TYDC5        |
| LOC_Os12g36940 | 3.7100   | 1.1500   | -1.6898 | 1.16E-05 | 0.00059 | CBP60B       |

|                |          |          |         |          |         |              |
|----------------|----------|----------|---------|----------|---------|--------------|
| LOC_Os11g04104 | 5.0900   | 13.6967  | 1.4281  | 1.17E-05 | 0.00059 | ZIFL1        |
| LOC_Os03g06705 | 0.5933   | 0.0010   | -9.2127 | 1.19E-05 | 0.00061 | KCS11        |
| LOC_Os07g48460 | 5.1267   | 38.3800  | 2.9043  | 1.20E-05 | 0.00061 | -            |
| LOC_Os06g49000 | 3.0733   | 1.0800   | -1.5088 | 1.20E-05 | 0.00061 | -            |
| LOC_Os10g40620 | 7.0467   | 1.5467   | -2.1878 | 1.21E-05 | 0.00061 | QWRF7        |
| LOC_Os03g52860 | 0.2267   | 0.0010   | -7.8244 | 1.24E-05 | 0.00062 | LOX1.1       |
| LOC_Os08g36760 | 14.7200  | 2.2700   | -2.6970 | 1.25E-05 | 0.00063 | -            |
| LOC_Os10g37570 | 0.8933   | 0.0233   | -5.2587 | 1.32E-05 | 0.00066 | -            |
| LOC_Os03g62490 | 5.3833   | 13.2933  | 1.3041  | 1.34E-05 | 0.00067 | PHB2         |
| LOC_Os12g41650 | 16.7333  | 40.5300  | 1.2763  | 1.34E-05 | 0.00067 | PIF1         |
| LOC_Os07g06175 | 0.4033   | 0.0010   | -8.6558 | 1.34E-05 | 0.00067 | PER2         |
| LOC_Os01g71970 | 9.4033   | 19.1433  | 1.0256  | 1.35E-05 | 0.00067 | SCL3         |
| LOC_Os02g51910 | 8.7033   | 18.6500  | 1.0995  | 1.36E-05 | 0.00068 | UGT85A24     |
| LOC_Os01g05820 | 4.5833   | 0.8000   | -2.5183 | 1.38E-05 | 0.00068 | GGT3         |
| LOC_Os11g07270 | 1.0233   | 2.7400   | 1.4209  | 1.38E-05 | 0.00068 | At3g47570    |
| LOC_Os06g32990 | 2.4633   | 0.1400   | -4.1371 | 1.39E-05 | 0.00069 | PER36        |
| LOC_Os03g14730 | 108.9100 | 28.8200  | -1.9180 | 1.40E-05 | 0.00069 | CXE8         |
| LOC_Os07g23150 | 1.2600   | 0.2900   | -2.1193 | 1.40E-05 | 0.00069 | 3MAT         |
| LOC_Os12g08200 | 2.0433   | 0.2400   | -3.0898 | 1.41E-05 | 0.00069 | -            |
| LOC_Os02g42150 | 7.0733   | 1.1167   | -2.6632 | 1.42E-05 | 0.0007  | WAK5         |
| LOC_Os12g40900 | 1.5700   | 0.3500   | -2.1653 | 1.42E-05 | 0.0007  | IAA31        |
| LOC_Os02g34390 | 1.1433   | 0.0500   | -4.5152 | 1.46E-05 | 0.00071 | -            |
| LOC_Os12g04440 | 13.7367  | 37.8500  | 1.4623  | 1.47E-05 | 0.00072 | IPMSA        |
| LOC_Os11g05800 | 4.5433   | 1.1300   | -2.0074 | 1.48E-05 | 0.00072 | HVA22J       |
| LOC_Os06g06780 | 41.8933  | 13.2833  | -1.6571 | 1.49E-05 | 0.00073 | -            |
| LOC_Os02g12420 | 4.2667   | 10.6933  | 1.3255  | 1.55E-05 | 0.00075 | At3g47570    |
| LOC_Os01g70850 | 3.5000   | 12.5567  | 1.8430  | 1.56E-05 | 0.00076 | PIR7B        |
| LOC_Os03g14030 | 22.0167  | 4.9967   | -2.1396 | 1.57E-05 | 0.00076 | -            |
| LOC_Os12g32230 | 35.7700  | 80.6067  | 1.1721  | 1.59E-05 | 0.00077 | CNX2         |
| LOC_Os02g40100 | 6.8200   | 1.7333   | -1.9762 | 1.59E-05 | 0.00077 | FPP7         |
| LOC_Os04g12580 | 2.4167   | 0.9200   | -1.3933 | 1.59E-05 | 0.00077 | RLK1         |
| LOC_Os05g50800 | 13.4600  | 1.6467   | -3.0311 | 1.60E-05 | 0.00077 | Os05g0585400 |
| LOC_Os08g37730 | 0.8700   | 0.2000   | -2.1210 | 1.60E-05 | 0.00077 | BHLH96       |
| LOC_Os01g45640 | 8.2633   | 32.0600  | 1.9560  | 1.60E-05 | 0.00077 | -            |
| LOC_Os11g02424 | 287.2133 | 127.0867 | -1.1763 | 1.62E-05 | 0.00078 | ATL72        |
| LOC_Os01g57050 | 0.9500   | 0.1067   | -3.1548 | 1.64E-05 | 0.00079 | -            |
| LOC_Os07g02140 | 4.1533   | 1.5467   | -1.4251 | 1.65E-05 | 0.00079 | At5g07800    |
| LOC_Os06g10670 | 2.8567   | 0.4633   | -2.6242 | 1.65E-05 | 0.00079 | nep1         |
| LOC_Os10g38920 | 0.6833   | 0.0533   | -3.6795 | 1.66E-05 | 0.00079 | At1g01540    |
| LOC_Os01g16030 | 2.5233   | 0.6067   | -2.0564 | 1.69E-05 | 0.0008  | ARF          |
| LOC_Os02g53790 | 11.5967  | 4.0100   | -1.5320 | 1.70E-05 | 0.00081 | Os02g0778400 |
| LOC_Os11g02520 | 2.6600   | 0.2267   | -3.5528 | 1.71E-05 | 0.00081 | WRKY46       |
| LOC_Os11g12040 | 0.3867   | 0.0700   | -2.4657 | 1.72E-05 | 0.00081 | RPM1         |

|                |          |          |         |          |         |              |
|----------------|----------|----------|---------|----------|---------|--------------|
| LOC_Os07g27810 | 37.0467  | 9.5367   | -1.9578 | 1.73E-05 | 0.00082 | -            |
| LOC_Os11g35500 | 1.7700   | 0.5067   | -1.8046 | 1.79E-05 | 0.00084 | At3g47570    |
| LOC_Os03g27230 | 43.8367  | 14.0033  | -1.6464 | 1.80E-05 | 0.00085 | DAHPS1       |
| LOC_Os04g28250 | 4.1367   | 0.6533   | -2.6626 | 1.81E-05 | 0.00085 | Os04g0350100 |
| LOC_Os09g18450 | 1.2267   | 0.1200   | -3.3536 | 1.83E-05 | 0.00086 | NCS1         |
| LOC_Os03g16920 | 0.4167   | 2.6467   | 2.6672  | 1.86E-05 | 0.00087 | HSP70        |
| LOC_Os09g07450 | 27.9567  | 4.7100   | -2.5694 | 1.87E-05 | 0.00087 | At3g50210    |
| LOC_Os05g09724 | 15.9667  | 2.9600   | -2.4314 | 1.88E-05 | 0.00088 | APS1         |
| LOC_Os05g29750 | 0.4467   | 2.6100   | 2.5468  | 1.90E-05 | 0.00089 | CYP71B34     |
| LOC_Os02g46600 | 3.6767   | 1.5033   | -1.2902 | 1.91E-05 | 0.00089 | Os04g0590900 |
| LOC_Os01g73980 | 2.7933   | 0.5267   | -2.4070 | 1.94E-05 | 0.0009  | XCP2         |
| MSTRG.5861     | 4.0333   | 11.7833  | 1.5467  | 1.94E-05 | 0.0009  | --           |
| LOC_Os11g38640 | 0.0467   | 0.4267   | 3.1926  | 1.94E-05 | 0.0009  | -            |
| LOC_Os11g14544 | 167.5767 | 389.4733 | 1.2167  | 1.96E-05 | 0.00091 | At5g02620    |
| LOC_Os09g36700 | 910.3900 | 297.8733 | -1.6118 | 1.97E-05 | 0.00091 | RNS1         |
| LOC_Os07g40220 | 0.3000   | 2.0500   | 2.7726  | 1.97E-05 | 0.00091 | -            |
| LOC_Os02g49310 | 3.4300   | 1.1733   | -1.5476 | 1.98E-05 | 0.00091 | OsI_021818   |
| LOC_Os09g32080 | 26.3433  | 10.4367  | -1.3358 | 1.99E-05 | 0.00091 | CTL1         |
| LOC_Os06g11760 | 17.9033  | 2.1667   | -3.0467 | 1.99E-05 | 0.00091 | -            |
| LOC_Os06g06850 | 0.5800   | 3.6667   | 2.6603  | 2.00E-05 | 0.00091 | RPP13        |
| LOC_Os11g47500 | 4.3700   | 24.6067  | 2.4933  | 2.00E-05 | 0.00091 | RIXI         |
| LOC_Os12g37519 | 5.1867   | 15.6367  | 1.5921  | 2.01E-05 | 0.00092 | -            |
| LOC_Os06g05550 | 16.4900  | 2.1167   | -2.9617 | 2.04E-05 | 0.00093 | APG          |
| LOC_Os12g08280 | 25.6467  | 9.9300   | -1.3689 | 2.05E-05 | 0.00093 | Os12g0183300 |
| LOC_Os11g17540 | 43.3000  | 7.9933   | -2.4375 | 2.05E-05 | 0.00093 | -            |
| LOC_Os01g50680 | 0.2367   | 0.0010   | -7.8867 | 2.06E-05 | 0.00093 | SBT5.4       |
| LOC_Os03g17790 | 3.3633   | 21.6100  | 2.6837  | 2.06E-05 | 0.00093 | LT101.2      |
| LOC_Os01g61620 | 2.7700   | 0.7067   | -1.9708 | 2.07E-05 | 0.00093 | pom1         |
| LOC_Os02g08270 | 7.2333   | 0.4867   | -3.8937 | 2.08E-05 | 0.00094 | guaAA        |
| LOC_Os08g39090 | 34.9067  | 71.8933  | 1.0424  | 2.10E-05 | 0.00095 | Cwc25        |
| LOC_Os02g37690 | 99.8500  | 30.8467  | -1.6946 | 2.11E-05 | 0.00095 | UGT91B1      |
| LOC_Os03g07200 | 1.1367   | 3.4733   | 1.6115  | 2.12E-05 | 0.00095 | -            |
| LOC_Os01g52010 | 37.2367  | 15.5833  | -1.2567 | 2.13E-05 | 0.00095 | TAR4         |
| LOC_Os05g40630 | 2.2667   | 0.3967   | -2.5146 | 2.15E-05 | 0.00096 | At2g38640    |
| LOC_Os01g51210 | 3.7567   | 8.9367   | 1.2503  | 2.16E-05 | 0.00096 | LOGL1        |
| LOC_Os11g26340 | 4.4300   | 0.2633   | -4.0723 | 2.26E-05 | 0.00101 | -            |
| LOC_Os04g37880 | 11.2067  | 1.6100   | -2.7992 | 2.27E-05 | 0.00101 | -            |
| LOC_Os03g63370 | 24.1867  | 7.1233   | -1.7636 | 2.27E-05 | 0.00101 | rsc5         |
| LOC_Os05g50830 | 1.3067   | 0.3933   | -1.7321 | 2.32E-05 | 0.00102 | PHY1         |
| LOC_Os04g48260 | 2.0633   | 5.4733   | 1.4074  | 2.32E-05 | 0.00102 | BB           |
| LOC_Os06g01972 | 7.8233   | 1.1833   | -2.7249 | 2.33E-05 | 0.00103 | At3g30340    |
| LOC_Os11g32620 | 1.2900   | 0.1367   | -3.2386 | 2.34E-05 | 0.00103 | Os07g0271500 |
| LOC_Os04g52880 | 1.8900   | 0.3167   | -2.5773 | 2.40E-05 | 0.00106 | -            |

|                |          |          |         |          |         |              |
|----------------|----------|----------|---------|----------|---------|--------------|
| LOC_Os03g04060 | 36.0767  | 7.6833   | -2.2313 | 2.41E-05 | 0.00106 | Cht11        |
| LOC_Os05g33130 | 0.6333   | 5.9467   | 3.2310  | 2.41E-05 | 0.00106 | Cht2         |
| LOC_Os12g37650 | 410.8367 | 116.6700 | -1.8161 | 2.46E-05 | 0.00108 | -            |
| LOC_Os06g35520 | 38.1167  | 96.9533  | 1.3469  | 2.47E-05 | 0.00108 | -            |
| LOC_Os10g36880 | 7.5367   | 3.6800   | -1.0342 | 2.48E-05 | 0.00108 | kif11        |
| LOC_Os01g61370 | 0.9200   | 0.1033   | -3.1543 | 2.48E-05 | 0.00108 | -            |
| LOC_Os01g02350 | 1.4200   | 4.0233   | 1.5025  | 2.49E-05 | 0.00108 | GDPDL2       |
| LOC_Os03g01290 | 0.6167   | 0.1000   | -2.6245 | 2.51E-05 | 0.00109 | NPF6.3       |
| LOC_Os02g07160 | 11.6733  | 37.0767  | 1.6673  | 2.51E-05 | 0.00109 | -            |
| LOC_Os03g64320 | 8.6100   | 2.4667   | -1.8035 | 2.51E-05 | 0.00109 | -            |
| LOC_Os03g08100 | 10.1800  | 2.5367   | -2.0047 | 2.52E-05 | 0.00109 | todF         |
| LOC_Os01g54030 | 0.4867   | 2.6800   | 2.4612  | 2.53E-05 | 0.00109 | -            |
| LOC_Os01g47780 | 5.5300   | 0.6933   | -2.9957 | 2.54E-05 | 0.00109 | FLA11        |
| LOC_Os10g04429 | 0.4267   | 0.0167   | -4.6781 | 2.55E-05 | 0.0011  | HSR201       |
| LOC_Os05g10670 | 6.9300   | 20.7667  | 1.5833  | 2.55E-05 | 0.0011  | Os05g0195200 |
| LOC_Os11g40930 | 4.5200   | 0.4467   | -3.3391 | 2.57E-05 | 0.0011  | -            |
| LOC_Os03g60850 | 13.4333  | 4.7567   | -1.4978 | 2.59E-05 | 0.00111 | NPF5.7       |
| LOC_Os03g25790 | 2.7833   | 6.9033   | 1.3105  | 2.61E-05 | 0.00112 | At3g13560    |
| LOC_Os11g14390 | 0.7067   | 0.0300   | -4.5580 | 2.61E-05 | 0.00112 | -            |
| LOC_Os04g11956 | 2.6367   | 0.2467   | -3.4181 | 2.62E-05 | 0.00112 | -            |
| LOC_Os01g43710 | 36.1767  | 81.4333  | 1.1706  | 2.64E-05 | 0.00113 | CYP72A15     |
| LOC_Os04g44320 | 5.4900   | 1.9300   | -1.5082 | 2.65E-05 | 0.00113 | YSL12        |
| LOC_Os10g05750 | 1.4000   | 0.0300   | -5.5443 | 2.65E-05 | 0.00113 | PRP2         |
| LOC_Os01g38229 | 55.3533  | 18.3700  | -1.5913 | 2.69E-05 | 0.00114 | FKBP70       |
| LOC_Os09g08990 | 1.2033   | 0.1100   | -3.4515 | 2.69E-05 | 0.00114 | CYP75B1      |
| LOC_Os12g04410 | 1.5033   | 0.3000   | -2.3251 | 2.71E-05 | 0.00115 | NPR6         |
| LOC_Os09g31031 | 13.5667  | 45.5700  | 1.7480  | 2.72E-05 | 0.00115 | Ub-CEP52-2   |
| LOC_Os02g22820 | 22.5333  | 50.1600  | 1.1545  | 2.73E-05 | 0.00115 | -            |
| LOC_Os04g53210 | 3.1400   | 9.2733   | 1.5623  | 2.76E-05 | 0.00116 | GLO3         |
| LOC_Os10g38740 | 9.5267   | 31.1367  | 1.7086  | 2.77E-05 | 0.00116 | GSTU6        |
| LOC_Os03g12500 | 6.2100   | 0.8500   | -2.8691 | 2.77E-05 | 0.00116 | CYP74A2      |
| LOC_Os03g21730 | 0.4500   | 0.1000   | -2.1699 | 2.78E-05 | 0.00116 | IRK          |
| LOC_Os05g04510 | 349.8100 | 148.6267 | -1.2349 | 2.79E-05 | 0.00117 | SAM1         |
| LOC_Os06g46740 | 12.8567  | 82.5800  | 2.6833  | 2.82E-05 | 0.00118 | At4g27520    |
| LOC_Os11g03060 | 5.2667   | 2.1433   | -1.2970 | 2.83E-05 | 0.00118 | VPS32.2      |
| LOC_Os04g34490 | 0.5467   | 0.0010   | -9.0945 | 2.83E-05 | 0.00118 | At3g30340    |
| LOC_Os03g62010 | 37.6867  | 12.4967  | -1.5925 | 2.84E-05 | 0.00118 | -            |
| LOC_Os01g36460 | 11.9100  | 1.6400   | -2.8604 | 2.84E-05 | 0.00118 | MYB2         |
| LOC_Os06g37020 | 3.8300   | 0.9267   | -2.0472 | 2.98E-05 | 0.00124 | -            |
| LOC_Os03g45619 | 45.4667  | 1.2967   | -5.1319 | 3.09E-05 | 0.00128 | CYP87A3      |
| LOC_Os02g08330 | 0.7533   | 2.5033   | 1.7325  | 3.13E-05 | 0.00129 | MIMI_L728    |
| LOC_Os02g25630 | 0.5700   | 0.0400   | -3.8329 | 3.14E-05 | 0.00129 | FT1          |
| LOC_Os05g32110 | 52.5300  | 21.2700  | -1.3043 | 3.15E-05 | 0.00129 | BC1L4        |

|                |          |          |         |          |         |              |
|----------------|----------|----------|---------|----------|---------|--------------|
| LOC_Os02g37700 | 47.0567  | 10.8067  | -2.1225 | 3.17E-05 | 0.0013  | Os03g0232800 |
| LOC_Os09g32100 | 1.5633   | 0.3433   | -2.1869 | 3.21E-05 | 0.00132 | -            |
| LOC_Os02g51930 | 5.6967   | 26.5367  | 2.2198  | 3.22E-05 | 0.00132 | UGT85A24     |
| LOC_Os04g38310 | 9.6567   | 1.7733   | -2.4451 | 3.25E-05 | 0.00133 | -            |
| LOC_Os10g35070 | 77.8900  | 243.6800 | 1.6455  | 3.26E-05 | 0.00133 | AGAL1        |
| LOC_Os03g56540 | 4.8400   | 15.1433  | 1.6456  | 3.26E-05 | 0.00133 | TIM14-3      |
| LOC_Os04g08280 | 1.8467   | 0.1833   | -3.3324 | 3.26E-05 | 0.00133 | -            |
| LOC_Os02g17000 | 7.9400   | 1.0600   | -2.9051 | 3.27E-05 | 0.00133 | SBT3.3       |
| LOC_Os04g34270 | 33.4933  | 3.8067   | -3.1373 | 3.27E-05 | 0.00133 | At2g19130    |
| LOC_Os08g34280 | 30.7533  | 6.9233   | -2.1512 | 3.28E-05 | 0.00133 | CCR1         |
| LOC_Os03g54040 | 31.4433  | 11.1600  | -1.4944 | 3.32E-05 | 0.00134 | RPL6         |
| LOC_Os01g46120 | 25.7067  | 5.8100   | -2.1455 | 3.33E-05 | 0.00135 | At1g28600    |
| LOC_Os07g46280 | 6.9667   | 17.6300  | 1.3395  | 3.37E-05 | 0.00136 | BGLU26       |
| LOC_Os11g06980 | 18.6233  | 6.6100   | -1.4944 | 3.39E-05 | 0.00137 | BURP17       |
| LOC_Os07g34020 | 2.7667   | 0.6933   | -1.9965 | 3.42E-05 | 0.00138 | -            |
| MSTRG.3995     | 0.0700   | 1.2333   | 4.1391  | 3.43E-05 | 0.00138 | --           |
| LOC_Os01g71710 | 8.2200   | 2.0367   | -2.0129 | 3.48E-05 | 0.0014  | BAT1         |
| LOC_Os01g73110 | 28.1000  | 86.4300  | 1.6210  | 3.54E-05 | 0.00142 | -            |
| LOC_Os05g51610 | 12.0333  | 25.9000  | 1.1059  | 3.55E-05 | 0.00142 | CAX1b        |
| LOC_Os11g05700 | 11.3300  | 33.2167  | 1.5518  | 3.64E-05 | 0.00146 | ABCC10       |
| LOC_Os01g66840 | 3.9867   | 0.2300   | -4.1155 | 3.66E-05 | 0.00146 | PAE5         |
| LOC_Os01g47470 | 6.1000   | 2.6700   | -1.1920 | 3.73E-05 | 0.00149 | At2g42960    |
| LOC_Os02g33330 | 27.0900  | 10.0933  | -1.4244 | 3.79E-05 | 0.00151 | -            |
| LOC_Os11g45400 | 2.2767   | 0.4233   | -2.4271 | 3.84E-05 | 0.00153 | GPAT3        |
| LOC_Os03g50560 | 2.5767   | 0.8200   | -1.6518 | 3.87E-05 | 0.00154 | BPA1         |
| LOC_Os01g62010 | 3.4567   | 0.2767   | -3.6432 | 3.88E-05 | 0.00154 | CSE          |
| LOC_Os02g37180 | 2.8433   | 0.4800   | -2.5665 | 3.94E-05 | 0.00156 | -            |
| LOC_Os11g29720 | 3.0533   | 1.0033   | -1.6056 | 3.94E-05 | 0.00156 | CYP78A5      |
| LOC_Os03g14880 | 5.4533   | 1.8667   | -1.5467 | 3.97E-05 | 0.00157 | -            |
| LOC_Os12g40860 | 0.2033   | 0.0010   | -7.6677 | 3.98E-05 | 0.00157 | FBL17        |
| LOC_Os02g12730 | 1.1467   | 0.1067   | -3.4263 | 3.99E-05 | 0.00157 | Os02g0219200 |
| LOC_Os12g04020 | 15.4767  | 7.5100   | -1.0432 | 4.00E-05 | 0.00157 | HMGCL        |
| LOC_Os01g58100 | 0.8833   | 0.0733   | -3.5904 | 4.10E-05 | 0.00161 | -            |
| LOC_Os11g05410 | 0.8467   | 3.2033   | 1.9197  | 4.13E-05 | 0.00162 | PAP20        |
| LOC_Os12g27254 | 2.5800   | 0.1733   | -3.8958 | 4.17E-05 | 0.00163 | HSR201       |
| LOC_Os01g54080 | 4.7900   | 1.2900   | -1.8927 | 4.21E-05 | 0.00165 | KP1          |
| LOC_Os05g03480 | 79.8767  | 180.6800 | 1.1776  | 4.22E-05 | 0.00165 | Os05g0125500 |
| LOC_Os11g29290 | 50.5700  | 10.8400  | -2.2219 | 4.23E-05 | 0.00165 | CYP94B3      |
| LOC_Os05g46830 | 22.1900  | 3.7933   | -2.5484 | 4.25E-05 | 0.00166 | -            |
| LOC_Os11g26860 | 139.5733 | 67.0167  | -1.0584 | 4.27E-05 | 0.00166 | SHM4         |
| LOC_Os01g08440 | 5.1500   | 17.9633  | 1.8024  | 4.30E-05 | 0.00167 | UGT75L6      |
| LOC_Os03g12890 | 7.0233   | 20.8967  | 1.5730  | 4.32E-05 | 0.00167 | BCAT5        |
| LOC_Os05g18660 | 18.3800  | 37.2533  | 1.0192  | 4.39E-05 | 0.0017  | -            |

|                |          |          |         |          |         |              |
|----------------|----------|----------|---------|----------|---------|--------------|
| LOC_Os01g15830 | 1.7667   | 0.3700   | -2.2554 | 4.43E-05 | 0.00171 | PER72        |
| LOC_Os07g02060 | 0.9300   | 3.1400   | 1.7555  | 4.44E-05 | 0.00172 | WRKY57       |
| LOC_Os11g30290 | 0.0233   | 2.1467   | 6.5236  | 4.46E-05 | 0.00172 | At1g07170    |
| LOC_Os01g19020 | 170.3500 | 49.6800  | -1.7778 | 4.48E-05 | 0.00172 | PER2         |
| LOC_Os04g02620 | 37.5600  | 6.8800   | -2.4487 | 4.50E-05 | 0.00173 | KCR1         |
| LOC_Os11g03440 | 2.5500   | 0.2967   | -3.1036 | 4.56E-05 | 0.00175 | MYB306       |
| LOC_Os01g43740 | 2.4800   | 12.2667  | 2.3063  | 4.57E-05 | 0.00175 | CYP72A13     |
| LOC_Os09g27510 | 0.2467   | 0.9767   | 1.9853  | 4.60E-05 | 0.00176 | CYP76M5      |
| LOC_Os05g12400 | 58.5567  | 10.7600  | -2.4442 | 4.66E-05 | 0.00178 | BURP1        |
| LOC_Os01g43350 | 2.1867   | 1.0100   | -1.1144 | 4.67E-05 | 0.00178 | PHY1         |
| LOC_Os10g12190 | 0.4733   | 2.0633   | 2.1240  | 4.68E-05 | 0.00178 | At3g30340    |
| LOC_Os01g32670 | 14.1500  | 45.1867  | 1.6751  | 4.68E-05 | 0.00178 | -            |
| LOC_Os02g58170 | 1.4300   | 4.4100   | 1.6248  | 4.74E-05 | 0.0018  | Os03g0733400 |
| LOC_Os09g36350 | 29.0033  | 12.4567  | -1.2193 | 4.75E-05 | 0.0018  | Os09g0533900 |
| LOC_Os01g03390 | 103.4300 | 295.2667 | 1.5134  | 4.76E-05 | 0.0018  | RBI3.3       |
| LOC_Os07g34850 | 1.1367   | 0.1833   | -2.6323 | 4.78E-05 | 0.00181 | nep1         |
| LOC_Os03g05530 | 17.8533  | 5.8767   | -1.6031 | 4.79E-05 | 0.00181 | At2g39510    |
| LOC_Os08g39730 | 3.2700   | 14.6100  | 2.1596  | 4.88E-05 | 0.00184 | CYP76M5      |
| LOC_Os11g11960 | 23.0100  | 5.0933   | -2.1756 | 4.89E-05 | 0.00184 | RPM1         |
| LOC_Os11g47550 | 0.1233   | 1.3500   | 3.4523  | 4.90E-05 | 0.00184 | Chib3H-h     |
| LOC_Os03g12250 | 32.1200  | 10.5867  | -1.6012 | 4.90E-05 | 0.00184 | RKL1         |
| LOC_Os01g22570 | 7.6533   | 0.0867   | -6.4645 | 4.91E-05 | 0.00184 | GPAT3        |
| LOC_Os08g31030 | 0.4667   | 0.0467   | -3.3219 | 4.91E-05 | 0.00184 | HTH          |
| LOC_Os09g26210 | 23.4833  | 9.7033   | -1.2751 | 4.92E-05 | 0.00184 | ZFP2         |
| LOC_Os09g26880 | 95.1767  | 245.5133 | 1.3671  | 4.96E-05 | 0.00186 | -            |
| LOC_Os12g07810 | 1.5067   | 0.1700   | -3.1478 | 4.97E-05 | 0.00186 | ALDH3H1      |
| LOC_Os03g10640 | 15.3100  | 2.5133   | -2.6068 | 5.01E-05 | 0.00187 | ACA2         |
| LOC_Os10g39420 | 9.7867   | 3.4533   | -1.5028 | 5.02E-05 | 0.00187 | SPK          |
| LOC_Os01g66720 | 3.0133   | 0.6833   | -2.1407 | 5.03E-05 | 0.00187 | DBR          |
| LOC_Os05g03920 | 18.9233  | 73.9567  | 1.9665  | 5.03E-05 | 0.00187 | CRK2         |
| LOC_Os04g58790 | 3.2733   | 0.3667   | -3.1582 | 5.08E-05 | 0.00189 | -            |
| LOC_Os06g39240 | 1.7767   | 7.0133   | 1.9809  | 5.13E-05 | 0.0019  | MBF1C        |
| LOC_Os02g57350 | 0.7300   | 0.0200   | -5.1898 | 5.16E-05 | 0.00191 | -            |
| LOC_Os07g37350 | 2.6500   | 1.0367   | -1.3540 | 5.30E-05 | 0.00196 | -            |
| LOC_Os06g28820 | 5.5067   | 1.2733   | -2.1126 | 5.33E-05 | 0.00197 | Os11g0285000 |
| LOC_Os04g54800 | 17.5567  | 3.4500   | -2.3474 | 5.36E-05 | 0.00197 | SK3          |
| LOC_Os04g58390 | 8.3367   | 2.9233   | -1.5119 | 5.37E-05 | 0.00198 | ALN          |
| LOC_Os01g47080 | 5.9467   | 2.5033   | -1.2482 | 5.41E-05 | 0.00199 | PKP2         |
| LOC_Os09g36250 | 9.3300   | 3.6700   | -1.3461 | 5.43E-05 | 0.00199 | ODO1         |
| LOC_Os03g43750 | 0.3467   | 1.1467   | 1.7258  | 5.43E-05 | 0.00199 | -            |
| LOC_Os11g04380 | 0.3000   | 0.0033   | -6.4919 | 5.49E-05 | 0.00201 | At4g32390    |
| LOC_Os02g38920 | 28.2467  | 72.2700  | 1.3553  | 5.51E-05 | 0.00202 | GAPC3        |
| LOC_Os11g15570 | 23.2400  | 4.6367   | -2.3255 | 5.53E-05 | 0.00202 | At1g18480    |

|                |          |          |         |          |         |              |
|----------------|----------|----------|---------|----------|---------|--------------|
| LOC_Os03g02460 | 1.6067   | 0.3200   | -2.3279 | 5.57E-05 | 0.00203 | TIC32        |
| LOC_Os09g03960 | 2.5433   | 0.8233   | -1.6272 | 5.59E-05 | 0.00203 | -            |
| LOC_Os10g39300 | 0.8067   | 0.0667   | -3.5969 | 5.59E-05 | 0.00203 | nep1         |
| LOC_Os09g19350 | 0.3300   | 0.0010   | -8.3663 | 5.64E-05 | 0.00205 | At1g51890    |
| LOC_Os12g16200 | 59.7400  | 23.5633  | -1.3422 | 5.74E-05 | 0.00208 | GSH2         |
| LOC_Os05g37470 | 9.4800   | 4.2867   | -1.1450 | 5.75E-05 | 0.00208 | Os05g0447200 |
| LOC_Os02g48900 | 70.2000  | 21.9800  | -1.6753 | 5.76E-05 | 0.00208 | ASPG1        |
| LOC_Os03g13250 | 4.6800   | 9.9667   | 1.0906  | 5.76E-05 | 0.00208 | NPF8.3       |
| LOC_Os02g46970 | 23.9700  | 6.2567   | -1.9378 | 5.82E-05 | 0.0021  | 4CL2         |
| LOC_Os04g55600 | 68.9633  | 182.0700 | 1.4006  | 5.85E-05 | 0.00211 | -            |
| LOC_Os05g32420 | 0.7200   | 0.0700   | -3.3626 | 5.90E-05 | 0.00212 | -            |
| LOC_Os05g13620 | 1.2933   | 0.1433   | -3.1736 | 6.08E-05 | 0.00218 | -            |
| LOC_Os11g02540 | 5.6433   | 0.4100   | -3.7829 | 6.14E-05 | 0.00221 | WRKY70       |
| LOC_Os01g28500 | 154.2000 | 309.0700 | 1.0031  | 6.16E-05 | 0.00221 | PRMS         |
| LOC_Os12g43450 | 15.8867  | 59.4867  | 1.9047  | 6.16E-05 | 0.00221 | tlp          |
| LOC_Os04g41620 | 60.1367  | 150.5300 | 1.3237  | 6.19E-05 | 0.00222 | Cht4         |
| LOC_Os01g71474 | 2.9333   | 0.2200   | -3.7370 | 6.22E-05 | 0.00222 | -            |
| LOC_Os02g36619 | 0.8033   | 3.1767   | 1.9834  | 6.27E-05 | 0.00224 | -            |
| LOC_Os05g41220 | 54.0767  | 121.3767 | 1.1664  | 6.27E-05 | 0.00224 | KINB1        |
| LOC_Os02g44680 | 2.3067   | 0.6833   | -1.7551 | 6.45E-05 | 0.00229 | NCS1         |
| LOC_Os06g04370 | 0.0600   | 0.3933   | 2.7127  | 6.46E-05 | 0.00229 | NIK2         |
| LOC_Os04g11400 | 55.5867  | 19.7900  | -1.4900 | 6.48E-05 | 0.0023  | -            |
| LOC_Os06g07960 | 2.1033   | 0.4033   | -2.3826 | 6.56E-05 | 0.00232 | At3g57050    |
| LOC_Os11g26850 | 287.8033 | 113.1633 | -1.3467 | 6.61E-05 | 0.00234 | SAHH         |
| LOC_Os04g27060 | 8.3233   | 28.9533  | 1.7985  | 6.62E-05 | 0.00234 | Os04g0339400 |
| LOC_Os04g33640 | 19.0767  | 6.1100   | -1.6426 | 6.64E-05 | 0.00234 | At2g27500    |
| LOC_Os09g36880 | 3.7333   | 0.9033   | -2.0471 | 6.70E-05 | 0.00236 | EXL3         |
| LOC_Os06g08080 | 30.1200  | 7.7533   | -1.9578 | 6.70E-05 | 0.00236 | -            |
| LOC_Os11g34020 | 0.7800   | 0.1067   | -2.8704 | 6.75E-05 | 0.00237 | BOI          |
| LOC_Os12g05210 | 1.3867   | 11.0500  | 2.9944  | 6.75E-05 | 0.00237 | -            |
| LOC_Os08g07720 | 0.1000   | 1.1567   | 3.5319  | 6.80E-05 | 0.00239 | PMAT2        |
| LOC_Os08g10290 | 8.6467   | 1.6633   | -2.3781 | 6.93E-05 | 0.00243 | At1g56130    |
| LOC_Os10g32550 | 8.6133   | 17.8700  | 1.0529  | 6.94E-05 | 0.00243 | CPN60II      |
| LOC_Os07g33480 | 7.9833   | 22.6767  | 1.5061  | 7.09E-05 | 0.00248 | CYP716B1     |
| LOC_Os10g32110 | 6.3367   | 2.5067   | -1.3380 | 7.11E-05 | 0.00248 | Os03g0144800 |
| LOC_Os10g26500 | 0.6867   | 0.1433   | -2.2602 | 7.13E-05 | 0.00248 | HOX23        |
| LOC_Os01g62770 | 0.8467   | 2.5533   | 1.5925  | 7.21E-05 | 0.00251 | -            |
| LOC_Os06g04169 | 1.1833   | 0.1733   | -2.7712 | 7.23E-05 | 0.00251 | xylF         |
| LOC_Os06g29790 | 4.3733   | 1.6900   | -1.3717 | 7.38E-05 | 0.00256 | PHO1-3       |
| LOC_Os12g33300 | 4.0733   | 0.3233   | -3.6551 | 7.50E-05 | 0.0026  | At5g64700    |
| LOC_Os03g60090 | 116.7767 | 47.7067  | -1.2915 | 7.52E-05 | 0.0026  | Os03g0815200 |
| LOC_Os06g19070 | 43.3867  | 11.1333  | -1.9624 | 7.56E-05 | 0.00261 | CYP76C4      |
| LOC_Os03g48760 | 0.2333   | 1.8067   | 2.9529  | 7.63E-05 | 0.00263 | Os03g0694000 |



|                |          |          |         |          |         |           |
|----------------|----------|----------|---------|----------|---------|-----------|
| LOC_Os09g30486 | 2.0933   | 0.3333   | -2.6508 | 7.64E-05 | 0.00263 | FLA7      |
| LOC_Os07g12780 | 44.0767  | 135.3567 | 1.6187  | 7.65E-05 | 0.00263 | CYCP4-1   |
| LOC_Os06g18930 | 1.4500   | 0.5400   | -1.4250 | 7.65E-05 | 0.00263 | -         |
| LOC_Os11g40009 | 7.8067   | 2.6133   | -1.5788 | 7.68E-05 | 0.00264 | PLP1      |
| LOC_Os06g36390 | 63.9700  | 153.0500 | 1.2585  | 7.72E-05 | 0.00264 | -         |
| LOC_Os11g27370 | 4.3700   | 1.5300   | -1.5141 | 7.83E-05 | 0.00268 | RT        |
| LOC_Os06g38780 | 1.6967   | 0.5667   | -1.5821 | 7.93E-05 | 0.00271 | At3g47570 |
| LOC_Os09g18360 | 0.6067   | 0.0600   | -3.3379 | 8.00E-05 | 0.00273 | At1g51860 |
| LOC_Os05g01350 | 0.9100   | 2.2733   | 1.3209  | 8.08E-05 | 0.00276 | FH14      |
| LOC_Os05g28320 | 0.5200   | 0.0133   | -5.2854 | 8.18E-05 | 0.00278 | MYB44     |
| LOC_Os01g25500 | 8.8267   | 2.1300   | -2.0510 | 8.20E-05 | 0.00279 | -         |
| LOC_Os09g27040 | 6.5333   | 20.4600  | 1.6469  | 8.35E-05 | 0.00284 | GEX1      |
| LOC_Os01g65210 | 22.9033  | 6.5433   | -1.8075 | 8.42E-05 | 0.00286 | NPF5.10   |
| LOC_Os11g10800 | 1.3733   | 0.1600   | -3.1015 | 8.52E-05 | 0.00289 | DIR1      |
| LOC_Os10g37190 | 12.1567  | 3.7200   | -1.7084 | 8.60E-05 | 0.00291 | At1g33260 |
| LOC_Os10g12750 | 6.5500   | 0.8233   | -2.9919 | 8.61E-05 | 0.00291 | -         |
| LOC_Os01g58500 | 2.7800   | 0.7467   | -1.8965 | 8.63E-05 | 0.00292 | -         |
| LOC_Os01g22640 | 21.4767  | 4.6700   | -2.2013 | 8.69E-05 | 0.00293 | At1g09390 |
| MSTRG.26475    | 2.7767   | 0.4567   | -2.6041 | 8.74E-05 | 0.00295 | --        |
| LOC_Os03g04030 | 4.0800   | 8.4133   | 1.0441  | 8.76E-05 | 0.00295 | HVA22I    |
| LOC_Os09g07350 | 32.1667  | 6.6567   | -2.2727 | 8.89E-05 | 0.00299 | FLA2      |
| LOC_Os02g07830 | 3.4867   | 1.4500   | -1.2658 | 8.92E-05 | 0.003   | HKT6      |
| LOC_Os02g09830 | 0.1767   | 1.2467   | 2.8190  | 9.01E-05 | 0.00302 | BZIP43    |
| LOC_Os06g05980 | 1.6567   | 0.4033   | -2.0382 | 9.01E-05 | 0.00302 | At1g06470 |
| LOC_Os12g08720 | 6.8633   | 1.2067   | -2.5079 | 9.04E-05 | 0.00302 | PRL1-IFG  |
| LOC_Os04g46830 | 0.6467   | 0.0133   | -5.5999 | 9.04E-05 | 0.00302 | At4g12490 |
| LOC_Os02g49510 | 0.4800   | 0.0633   | -2.9220 | 9.20E-05 | 0.00307 | SLC38A1   |
| LOC_Os01g53170 | 0.8433   | 0.1733   | -2.2826 | 9.33E-05 | 0.00311 | -         |
| LOC_Os01g46130 | 10.6967  | 3.0500   | -1.8103 | 9.39E-05 | 0.00313 | -         |
| LOC_Os01g26210 | 1.1267   | 0.2733   | -2.0433 | 9.43E-05 | 0.00314 | WAK3      |
| LOC_Os01g14630 | 9.0000   | 0.9367   | -3.2643 | 9.51E-05 | 0.00316 | GGPPS1    |
| LOC_Os06g07790 | 4.3500   | 1.5333   | -1.5043 | 9.62E-05 | 0.00319 | -         |
| LOC_Os03g11600 | 0.9433   | 0.2233   | -2.0786 | 9.72E-05 | 0.00322 | DL        |
| LOC_Os06g06980 | 188.6867 | 69.0333  | -1.4506 | 9.75E-05 | 0.00322 | CCOAOMT2  |
| LOC_Os10g30390 | 0.0433   | 1.3100   | 4.9179  | 9.82E-05 | 0.00324 | CYP71Z7   |
| LOC_Os03g61740 | 1.3300   | 0.1967   | -2.7576 | 9.96E-05 | 0.00328 | SDR5      |
| LOC_Os04g46350 | 3.8200   | 1.6967   | -1.1709 | 0.0001   | 0.0033  | HOX17     |
| LOC_Os02g04840 | 21.2833  | 43.9633  | 1.0466  | 0.000101 | 0.00334 | ARA1      |
| LOC_Os07g10770 | 47.9233  | 17.3900  | -1.4625 | 0.000102 | 0.00335 | CESA8     |
| LOC_Os06g30830 | 0.4033   | 2.0100   | 2.3172  | 0.000102 | 0.00335 | AGL61     |
| LOC_Os08g41280 | 40.9100  | 17.0567  | -1.2621 | 0.000103 | 0.00338 | At3g25290 |
| LOC_Os11g48000 | 1.2733   | 0.3467   | -1.8770 | 0.000104 | 0.00339 | RBE       |
| LOC_Os04g42610 | 16.9433  | 5.2900   | -1.6794 | 0.000104 | 0.00341 | FPP7      |

|                |          |          |         |          |         |              |
|----------------|----------|----------|---------|----------|---------|--------------|
| LOC_Os08g29570 | 29.4200  | 6.4733   | -2.1842 | 0.000105 | 0.00344 | ABCG44       |
| LOC_Os11g05190 | 1.4800   | 0.2433   | -2.6046 | 0.000106 | 0.00345 | PSK2         |
| LOC_Os07g32010 | 11.1667  | 25.0500  | 1.1656  | 0.000106 | 0.00346 | RhGT1        |
| LOC_Os06g21250 | 3.8967   | 0.2633   | -3.8873 | 0.000107 | 0.00346 | -            |
| LOC_Os06g21360 | 0.2133   | 0.0010   | -7.7370 | 0.000107 | 0.00346 | NHX4         |
| LOC_Os10g06000 | 9.6200   | 0.1100   | -6.4505 | 0.000107 | 0.00346 | PRP4         |
| LOC_Os03g36279 | 0.2033   | 2.3267   | 3.5163  | 0.000109 | 0.00352 | GIN1         |
| LOC_Os09g27820 | 42.5033  | 12.7933  | -1.7322 | 0.000109 | 0.00354 | ACO1         |
| LOC_Os03g61260 | 328.4800 | 139.3167 | -1.2374 | 0.00011  | 0.00356 | RPL18        |
| LOC_Os02g57120 | 37.5733  | 8.9900   | -2.0633 | 0.00011  | 0.00356 | CLASP        |
| LOC_Os06g06560 | 1.1967   | 3.7067   | 1.6311  | 0.000111 | 0.00359 | Os06g0160700 |
| LOC_Os08g16260 | 23.7033  | 0.7633   | -4.9566 | 0.000112 | 0.00361 | CYP96A15     |
| LOC_Os07g34320 | 0.9900   | 0.1300   | -2.9289 | 0.000112 | 0.00361 | At5g64700    |
| LOC_Os01g38580 | 0.2400   | 1.7233   | 2.8441  | 0.000112 | 0.00361 | CCD8A        |
| LOC_Os07g41360 | 7.6600   | 2.7500   | -1.4779 | 0.000112 | 0.00361 | UAM3         |
| LOC_Os01g38530 | 55.9600  | 115.4067 | 1.0443  | 0.000113 | 0.00365 | ELF3         |
| LOC_Os10g02814 | 0.2133   | 0.7667   | 1.8455  | 0.000114 | 0.00365 | XLG3         |
| LOC_Os02g04780 | 0.1400   | 0.9533   | 2.7676  | 0.000114 | 0.00366 | -            |
| LOC_Os02g37000 | 3.6333   | 9.2567   | 1.3492  | 0.000114 | 0.00366 | PHB3         |
| LOC_Os10g39750 | 1.6833   | 0.2533   | -2.7322 | 0.000115 | 0.00367 | BHLH93       |
| LOC_Os02g55330 | 7.3367   | 3.4000   | -1.1096 | 0.000115 | 0.00367 | abhd17c      |
| LOC_Os04g51140 | 2.0000   | 5.2533   | 1.3932  | 0.000115 | 0.00368 | -            |
| LOC_Os11g46000 | 0.2667   | 0.0033   | -6.3219 | 0.000115 | 0.00368 | -            |
| LOC_Os01g04230 | 1.2967   | 0.3167   | -2.0338 | 0.000116 | 0.00369 | At1g68400    |
| LOC_Os07g41460 | 4.2700   | 11.7633  | 1.4620  | 0.000117 | 0.00374 | SOT5         |
| LOC_Os01g68290 | 0.1733   | 1.7067   | 3.2996  | 0.000118 | 0.00374 | -            |
| LOC_Os07g42200 | 26.3367  | 12.4033  | -1.0863 | 0.000118 | 0.00375 | At5g01020    |
| LOC_Os11g12320 | 2.1067   | 0.2900   | -2.8608 | 0.000119 | 0.00378 | RPM1         |
| LOC_Os09g07460 | 3.5833   | 1.5833   | -1.1783 | 0.00012  | 0.00379 | NSP5         |
| LOC_Os11g04600 | 1.4833   | 0.1700   | -3.1252 | 0.00012  | 0.00379 | NPR6         |
| LOC_Os12g28015 | 214.2967 | 519.0133 | 1.2762  | 0.000122 | 0.00386 | -            |
| LOC_Os06g18010 | 61.7933  | 18.0133  | -1.7784 | 0.000123 | 0.00387 | GmIF7GT1     |
| LOC_Os10g17260 | 7.4067   | 1.7733   | -2.0624 | 0.000123 | 0.00389 | CYP75B1      |
| LOC_Os07g09050 | 0.4067   | 1.6467   | 2.0176  | 0.000125 | 0.00393 | At5g03795    |
| LOC_Os02g02120 | 7.4467   | 2.0067   | -1.8918 | 0.000127 | 0.00399 | WAK5         |
| LOC_Os09g23620 | 0.6900   | 0.1400   | -2.3012 | 0.000128 | 0.00401 | ODO1         |
| LOC_Os08g44220 | 1.0267   | 0.1667   | -2.6229 | 0.000131 | 0.00409 | At4g39670    |
| LOC_Os09g25150 | 10.7967  | 3.8367   | -1.4927 | 0.000132 | 0.00412 | CCR1         |
| LOC_Os07g43990 | 12.8500  | 5.4233   | -1.2445 | 0.000133 | 0.00413 | -            |
| LOC_Os08g07080 | 0.2067   | 0.0010   | -7.6912 | 0.000133 | 0.00413 | TPS2         |
| LOC_Os08g07240 | 0.1500   | 1.8867   | 3.6528  | 0.000133 | 0.00413 | -            |
| LOC_Os11g26920 | 7.7733   | 1.0033   | -2.9537 | 0.000134 | 0.00415 | RT           |
| LOC_Os03g53360 | 2.7833   | 0.7400   | -1.9112 | 0.000135 | 0.00419 | CER26L       |

|                |          |         |         |          |                    |
|----------------|----------|---------|---------|----------|--------------------|
| LOC_Os06g49320 | 28.2467  | 8.8567  | -1.6732 | 0.000136 | 0.0042 pomgnt2     |
| LOC_Os02g28340 | 3.1700   | 9.7600  | 1.6224  | 0.000136 | 0.00422 3AT1       |
| LOC_Os10g39000 | 5.9600   | 1.5800  | -1.9154 | 0.000137 | 0.00424 -          |
| LOC_Os05g50190 | 25.9500  | 60.4633 | 1.2203  | 0.000139 | 0.00428 HT1        |
| LOC_Os03g02260 | 2.7733   | 6.9667  | 1.3288  | 0.000141 | 0.00433 -          |
| LOC_Os02g43700 | 101.0267 | 40.0600 | -1.3345 | 0.000142 | 0.00434 At4g16820  |
| LOC_Os08g14109 | 0.7933   | 0.0900  | -3.1399 | 0.000142 | 0.00434 -          |
| LOC_Os03g40770 | 13.9700  | 42.5333 | 1.6063  | 0.000142 | 0.00434 -          |
| LOC_Os08g39860 | 66.0333  | 26.6267 | -1.3103 | 0.000142 | 0.00434 BGLU27     |
| LOC_Os01g43774 | 2.2367   | 7.7800  | 1.7984  | 0.000142 | 0.00435 CYP72A15   |
| LOC_Os03g13740 | 2.5467   | 0.1600  | -3.9925 | 0.000143 | 0.00437 PUB21      |
| LOC_Os01g27360 | 2.7500   | 1.0600  | -1.3754 | 0.000144 | 0.00439 GSTF1      |
| LOC_Os05g03450 | 1.7733   | 0.6833  | -1.3758 | 0.000144 | 0.00439 LECRK81    |
| LOC_Os04g40070 | 0.3833   | 1.0867  | 1.5032  | 0.000144 | 0.00439 At5g50170  |
| LOC_Os01g45840 | 1.7733   | 5.1633  | 1.5418  | 0.000144 | 0.00439 PCMP-E44   |
| LOC_Os04g06520 | 32.9933  | 5.2700  | -2.6463 | 0.000146 | 0.00442 -          |
| LOC_Os03g30130 | 3.0700   | 1.4500  | -1.0822 | 0.000146 | 0.00443 At5g67130  |
| LOC_Os07g47480 | 3.7133   | 0.5433  | -2.7728 | 0.000146 | 0.00443 HIP26      |
| LOC_Os02g20560 | 38.8533  | 1.4133  | -4.7809 | 0.000147 | 0.00446 FLA11      |
| LOC_Os10g20350 | 1.9533   | 9.2033  | 2.2362  | 0.000148 | 0.00446 DTXL1      |
| LOC_Os01g15039 | 0.1367   | 0.0010  | -7.0945 | 0.000149 | 0.00451 -          |
| LOC_Os01g08110 | 0.7433   | 2.3433  | 1.6565  | 0.00015  | 0.00452 UGT73C3    |
| LOC_Os08g38990 | 16.5567  | 50.5433 | 1.6101  | 0.00015  | 0.00452 WRKY2      |
| LOC_Os02g03600 | 2.7833   | 6.1733  | 1.1492  | 0.00015  | 0.00452 DNAJB1     |
| LOC_Os05g49320 | 20.5533  | 7.4700  | -1.4602 | 0.00015  | 0.00452 RPL12-2    |
| LOC_Os02g41800 | 9.3767   | 4.1000  | -1.1935 | 0.000151 | 0.00454 ARF8       |
| LOC_Os09g32670 | 30.1400  | 12.0933 | -1.3175 | 0.000152 | 0.00456 GAE6       |
| LOC_Os06g16960 | 5.6200   | 1.5000  | -1.9056 | 0.000152 | 0.00457 OMT3       |
| LOC_Os06g28770 | 0.6133   | 0.0667  | -3.2016 | 0.000153 | 0.00457 -          |
| LOC_Os04g31520 | 2.1600   | 0.4867  | -2.1500 | 0.000153 | 0.00458 -          |
| LOC_Os07g38470 | 23.8133  | 3.9267  | -2.6004 | 0.000154 | 0.00458 -          |
| LOC_Os02g52150 | 2.0600   | 5.3333  | 1.3724  | 0.000154 | 0.00458 HSP24.1    |
| LOC_Os03g31750 | 8.5700   | 25.0533 | 1.5476  | 0.000154 | 0.00458 PPK2       |
| LOC_Os11g30360 | 4.3400   | 0.7967  | -2.4456 | 0.000154 | 0.00458 -          |
| LOC_Os05g51160 | 7.5133   | 2.1967  | -1.7741 | 0.000154 | 0.00459 DIVARICATA |
| LOC_Os03g02710 | 5.7233   | 2.5633  | -1.1588 | 0.000155 | 0.00461 HMGS       |
| LOC_Os03g60880 | 1.2900   | 0.2100  | -2.6189 | 0.000155 | 0.00461 NAT6       |
| LOC_Os01g18050 | 7.1467   | 3.3333  | -1.1003 | 0.000156 | 0.00463 TUBB1      |
| LOC_Os06g06250 | 67.5933  | 25.8833 | -1.3849 | 0.000157 | 0.00464 At5g45910  |
| LOC_Os01g66020 | 8.9000   | 19.4000 | 1.1242  | 0.000157 | 0.00466 At1g11050  |
| LOC_Os09g32470 | 6.6633   | 0.7133  | -3.2236 | 0.000159 | 0.00469 At3g25290  |
| LOC_Os04g38790 | 16.7167  | 5.2267  | -1.6773 | 0.00016  | 0.00471 -          |
| LOC_Os03g14250 | 30.2567  | 12.8767 | -1.2325 | 0.00016  | 0.00472 FPP4       |

|                |         |          |         |          |                      |
|----------------|---------|----------|---------|----------|----------------------|
| LOC_Os02g28310 | 2.2267  | 5.6833   | 1.3519  | 0.000161 | 0.00473 -            |
| LOC_Os11g18660 | 0.5167  | 0.0700   | -2.8838 | 0.000162 | 0.00477 PAZ7         |
| LOC_Os08g40690 | 0.2100  | 2.1867   | 3.3803  | 0.000162 | 0.00477 RIXI         |
| LOC_Os05g50770 | 0.3200  | 0.0033   | -6.5850 | 0.000163 | 0.00479 SLAH2        |
| LOC_Os08g29040 | 2.4133  | 0.2867   | -3.0736 | 0.000165 | 0.00482 WAK3         |
| LOC_Os11g12310 | 1.1933  | 0.1667   | -2.8400 | 0.000165 | 0.00482 TY3B-I       |
| LOC_Os10g41130 | 7.2800  | 2.3400   | -1.6374 | 0.000165 | 0.00482 ERF034       |
| LOC_Os03g25990 | 0.2300  | 0.0010   | -7.8455 | 0.000166 | 0.00485 EXPA21       |
| LOC_Os05g31290 | 3.9067  | 1.3867   | -1.4943 | 0.000166 | 0.00485 MTACP2       |
| LOC_Os03g25400 | 23.3900 | 11.1467  | -1.0693 | 0.000167 | 0.00486 PDK          |
| LOC_Os10g21130 | 3.7267  | 0.9133   | -2.0287 | 0.000167 | 0.00486 -            |
| LOC_Os02g38392 | 10.5433 | 2.3533   | -2.1636 | 0.000167 | 0.00486 TAO1         |
| LOC_Os01g51540 | 3.8167  | 1.4633   | -1.3831 | 0.000169 | 0.0049 CDA1          |
| LOC_Os05g47700 | 4.7033  | 0.4433   | -3.4072 | 0.000169 | 0.00491 LTP-2        |
| LOC_Os05g49300 | 6.1600  | 19.5200  | 1.6640  | 0.00017  | 0.00492 ISU1         |
| LOC_Os06g35940 | 36.8900 | 6.3100   | -2.5475 | 0.00017  | 0.00492 HD3A         |
| LOC_Os03g28260 | 20.0100 | 5.9900   | -1.7401 | 0.00017  | 0.00492 LEA5-A       |
| LOC_Os06g38120 | 5.5267  | 1.5100   | -1.8719 | 0.00017  | 0.00492 -            |
| LOC_Os12g24650 | 0.0400  | 1.0200   | 4.6724  | 0.000172 | 0.00497 Os02g0794700 |
| LOC_Os04g52320 | 2.1400  | 0.6967   | -1.6191 | 0.000174 | 0.00501 QRT3         |
| LOC_Os01g06660 | 3.2967  | 9.6100   | 1.5435  | 0.000174 | 0.00501 PDC1         |
| LOC_Os04g40050 | 2.1733  | 0.6700   | -1.6977 | 0.000175 | 0.00504 rnaseh2b     |
| LOC_Os06g36090 | 40.7167 | 15.8467  | -1.3614 | 0.000176 | 0.00506 ABCG42       |
| LOC_Os03g53150 | 14.7133 | 6.4033   | -1.2002 | 0.000178 | 0.00509 IAA13        |
| LOC_Os01g41780 | 1.0333  | 0.4067   | -1.3454 | 0.000181 | 0.00517 BRI1         |
| LOC_Os06g13230 | 6.6567  | 2.4933   | -1.4167 | 0.000183 | 0.00523 -            |
| LOC_Os12g38360 | 7.1833  | 1.4167   | -2.3422 | 0.000184 | 0.00525 -            |
| LOC_Os02g08490 | 1.1367  | 2.6800   | 1.2374  | 0.000184 | 0.00525 CLPB3        |
| LOC_Os07g13830 | 1.0367  | 3.4067   | 1.7164  | 0.000186 | 0.0053 -             |
| LOC_Os08g44770 | 80.0133 | 24.3100  | -1.7187 | 0.000187 | 0.00533 SODCP        |
| LOC_Os03g55180 | 7.0600  | 2.8633   | -1.3020 | 0.000191 | 0.00543 -            |
| LOC_Os02g51280 | 1.9800  | 0.6467   | -1.6144 | 0.000195 | 0.00553 TCP14        |
| LOC_Os07g10600 | 8.9800  | 18.0367  | 1.0061  | 0.000196 | 0.00557 Smt1-1       |
| LOC_Os02g42740 | 1.3700  | 0.4400   | -1.6386 | 0.000199 | 0.00563 MSBP2        |
| LOC_Os11g05494 | 17.0033 | 34.6533  | 1.0272  | 0.000199 | 0.00564 -            |
| LOC_Os06g22330 | 6.2500  | 1.9367   | -1.6903 | 0.000199 | 0.00564 -            |
| LOC_Os12g29740 | 3.3533  | 11.0167  | 1.7160  | 0.0002   | 0.00566 MYOB3        |
| LOC_Os03g58040 | 19.4100 | 9.1133   | -1.0907 | 0.000201 | 0.00568 GDH1         |
| LOC_Os04g15690 | 45.1633 | 18.5800  | -1.2814 | 0.000201 | 0.00568 -            |
| LOC_Os08g34320 | 0.3933  | 0.0633   | -2.6347 | 0.000203 | 0.00571 QWRF8        |
| LOC_Os08g43400 | 44.2167 | 14.2000  | -1.6387 | 0.000206 | 0.00578 NACK1        |
| LOC_Os08g32980 | 46.9933 | 133.0800 | 1.5018  | 0.000206 | 0.00578 -            |
| LOC_Os12g28590 | 0.1767  | 0.0010   | -7.4649 | 0.000207 | 0.00582 bcs11b       |

|                |          |          |         |          |         |              |
|----------------|----------|----------|---------|----------|---------|--------------|
| LOC_Os01g12580 | 0.3000   | 1.6267   | 2.4389  | 0.000208 | 0.00585 | LEA14-A      |
| LOC_Os03g16980 | 93.5333  | 42.5533  | -1.1362 | 0.00021  | 0.00589 | UXS6         |
| LOC_Os01g18660 | 2.5933   | 1.1700   | -1.1483 | 0.00021  | 0.00589 | LCD          |
| LOC_Os04g46660 | 0.6800   | 0.1267   | -2.4245 | 0.000211 | 0.00591 | CYCP2-1      |
| LOC_Os02g53850 | 0.3933   | 0.0333   | -3.5607 | 0.000212 | 0.00591 | SBT1.7       |
| LOC_Os02g50630 | 0.4800   | 0.1000   | -2.2630 | 0.000213 | 0.00594 | E2FE         |
| LOC_Os01g41890 | 0.8900   | 0.3033   | -1.5529 | 0.000215 | 0.00598 | RPP13        |
| LOC_Os04g52450 | 68.8133  | 137.7367 | 1.0012  | 0.000217 | 0.00604 | OSL2         |
| LOC_Os11g05550 | 6.2767   | 2.9233   | -1.1024 | 0.000219 | 0.00608 | At5g22090    |
| LOC_Os02g43290 | 1.6133   | 0.3933   | -2.0362 | 0.00022  | 0.00609 | At4g10390    |
| LOC_Os02g35940 | 3.1467   | 7.8533   | 1.3195  | 0.00022  | 0.00609 | TCEA2        |
| LOC_Os04g52390 | 18.2433  | 43.8533  | 1.2653  | 0.000221 | 0.00612 | HAK11        |
| LOC_Os06g06900 | 7.7733   | 3.5867   | -1.1159 | 0.000221 | 0.00612 | SPT          |
| LOC_Os04g55710 | 362.0000 | 71.6967  | -2.3360 | 0.000222 | 0.00613 | At3g16150    |
| LOC_Os11g47530 | 0.0633   | 0.9333   | 3.8814  | 0.000224 | 0.00618 | Chib3H-h     |
| LOC_Os10g27170 | 0.9100   | 0.3100   | -1.5536 | 0.000224 | 0.00619 | -            |
| LOC_Os03g15080 | 23.8633  | 8.6000   | -1.4724 | 0.000225 | 0.00622 | -            |
| LOC_Os03g30950 | 0.4333   | 3.3700   | 2.9592  | 0.000227 | 0.00627 | Os03g0423300 |
| LOC_Os04g12720 | 0.1133   | 0.9900   | 3.1269  | 0.000228 | 0.00629 | UGT74E1      |
| LOC_Os05g12640 | 21.4567  | 7.5500   | -1.5069 | 0.000229 | 0.0063  | BURP2        |
| LOC_Os07g08750 | 7.0033   | 2.5467   | -1.4594 | 0.000229 | 0.0063  | WNK3         |
| LOC_Os08g01910 | 0.8833   | 3.7667   | 2.0923  | 0.000231 | 0.00633 | -            |
| LOC_Os10g02250 | 0.7967   | 0.0633   | -3.6529 | 0.000231 | 0.00633 | WAK2         |
| LOC_Os12g12470 | 7.9833   | 2.3933   | -1.7380 | 0.000233 | 0.00639 | DBR          |
| LOC_Os06g28780 | 0.6933   | 0.0267   | -4.7004 | 0.000238 | 0.00652 | -            |
| LOC_Os01g51030 | 4.8100   | 9.9633   | 1.0506  | 0.000241 | 0.00657 | -            |
| LOC_Os01g26390 | 2.1100   | 5.6533   | 1.4219  | 0.000241 | 0.00657 | CRK25        |
| LOC_Os08g35710 | 6.4300   | 2.3867   | -1.4298 | 0.000241 | 0.00658 | -            |
| LOC_Os02g10290 | 11.3567  | 24.0267  | 1.0811  | 0.000244 | 0.00664 | HMA5         |
| LOC_Os04g28280 | 1.0800   | 0.1767   | -2.6119 | 0.000246 | 0.00669 | BHLH62       |
| LOC_Os06g41360 | 32.3500  | 69.6000  | 1.1053  | 0.000246 | 0.00669 | Os06g0617800 |
| LOC_Os09g37050 | 6.6367   | 2.0467   | -1.6972 | 0.000247 | 0.00669 | NIP1         |
| LOC_Os04g45720 | 0.3767   | 0.0567   | -2.7327 | 0.000247 | 0.00669 | ALDH3F1      |
| LOC_Os09g10600 | 5.0733   | 2.0900   | -1.2794 | 0.000247 | 0.00669 | Os09g0277800 |
| LOC_Os04g37480 | 1.8200   | 0.5667   | -1.6834 | 0.000249 | 0.00673 | COR2         |
| LOC_Os11g10460 | 1.0800   | 0.0400   | -4.7549 | 0.000249 | 0.00673 | PER43        |
| LOC_Os01g68770 | 53.0567  | 150.7467 | 1.5065  | 0.000251 | 0.00676 | SBP1         |
| LOC_Os01g72910 | 10.6533  | 3.4767   | -1.6155 | 0.000252 | 0.0068  | ASR1         |
| LOC_Os07g02910 | 3.2933   | 7.6500   | 1.2159  | 0.000253 | 0.00683 | -            |
| LOC_Os02g43970 | 4.5667   | 1.2567   | -1.8615 | 0.000254 | 0.00684 | ERF034       |
| LOC_Os02g09940 | 138.2167 | 51.5467  | -1.4230 | 0.000256 | 0.00688 | PRXIIIE-2    |
| LOC_Os03g26910 | 5.7667   | 1.8767   | -1.6196 | 0.000256 | 0.00688 | TPP9         |
| LOC_Os05g32960 | 7.2200   | 2.9667   | -1.2832 | 0.000257 | 0.00689 | -            |

|                |           |          |         |          |         |              |
|----------------|-----------|----------|---------|----------|---------|--------------|
| LOC_Os01g12760 | 5.6967    | 11.8400  | 1.0555  | 0.00026  | 0.00696 | CYP71A1      |
| LOC_Os01g70190 | 30.1733   | 13.2800  | -1.1840 | 0.00026  | 0.00697 | Os01g0926600 |
| LOC_Os02g43900 | 0.9533    | 0.2333   | -2.0306 | 0.000261 | 0.00698 | -            |
| LOC_Os01g53260 | 2.3133    | 5.9467   | 1.3621  | 0.000262 | 0.00701 | WRKY24       |
| LOC_Os01g11010 | 0.5100    | 0.0600   | -3.0875 | 0.000263 | 0.00701 | -            |
| LOC_Os07g30154 | 0.1767    | 1.4533   | 3.0403  | 0.000264 | 0.00705 | -            |
| LOC_Os10g25210 | 4.4367    | 9.7333   | 1.1335  | 0.000265 | 0.00705 | IRL5         |
| LOC_Os05g30970 | 11.8333   | 3.0067   | -1.9766 | 0.000266 | 0.00707 | BON3         |
| LOC_Os04g40990 | 7.2000    | 34.9800  | 2.2805  | 0.000267 | 0.00709 | MS           |
| LOC_Os04g25560 | 25.4767   | 9.8433   | -1.3720 | 0.000269 | 0.00713 | CBP1         |
| LOC_Os08g17140 | 0.3467    | 1.1400   | 1.7174  | 0.000269 | 0.00713 | pol          |
| LOC_Os03g10110 | 0.3333    | 0.0400   | -3.0589 | 0.00027  | 0.00716 | AMP2-2       |
| LOC_Os12g41940 | 0.0010    | 0.2167   | 7.7593  | 0.000272 | 0.00721 | -            |
| LOC_Os11g44560 | 2.5067    | 0.9300   | -1.4305 | 0.000274 | 0.00724 | CCR4         |
| LOC_Os11g02369 | 1655.0767 | 448.5433 | -1.8836 | 0.000276 | 0.00727 | LTP2-A       |
| LOC_Os01g67390 | 1.2133    | 0.0733   | -4.0484 | 0.00028  | 0.00738 | RBM12B       |
| LOC_Os01g48620 | 0.8733    | 0.2600   | -1.7480 | 0.000281 | 0.00739 | -            |
| LOC_Os10g36848 | 14.6833   | 2.3800   | -2.6251 | 0.000281 | 0.00739 | CYP84A1      |
| LOC_Os09g10274 | 64.8900   | 22.5833  | -1.5227 | 0.000281 | 0.00739 | -            |
| LOC_Os03g14610 | 6.8167    | 1.6733   | -2.0263 | 0.000282 | 0.0074  | HVA22I       |
| LOC_Os09g18230 | 2.1267    | 0.3867   | -2.4594 | 0.000282 | 0.0074  | SIRK         |
| LOC_Os03g60509 | 241.4533  | 68.3233  | -1.8213 | 0.000283 | 0.00741 | CHI          |
| LOC_Os02g46260 | 39.6767   | 14.9900  | -1.4043 | 0.000284 | 0.00745 | SCPL17       |
| LOC_Os05g32740 | 0.9100    | 0.0667   | -3.7708 | 0.000285 | 0.00746 | -            |
| LOC_Os07g46920 | 1.5433    | 0.1833   | -3.0735 | 0.000288 | 0.00754 | -            |
| LOC_Os02g44670 | 0.9267    | 0.0600   | -3.9490 | 0.000293 | 0.00764 | -            |
| LOC_Os01g08190 | 0.2300    | 0.0333   | -2.7866 | 0.000293 | 0.00765 | LUG          |
| LOC_Os08g39870 | 17.1133   | 5.9933   | -1.5137 | 0.000296 | 0.00771 | BGLU28       |
| LOC_Os09g39850 | 0.6900    | 3.4900   | 2.3386  | 0.000296 | 0.00772 | ERF1B        |
| LOC_Os03g24930 | 56.8267   | 125.1467 | 1.1390  | 0.000297 | 0.00772 | At5g01020    |
| LOC_Os12g04340 | 1.9000    | 0.4967   | -1.9356 | 0.000297 | 0.00772 | SOT16        |
| LOC_Os08g10400 | 2.1633    | 0.7633   | -1.5029 | 0.000298 | 0.00774 | -            |
| LOC_Os05g45100 | 1.1367    | 5.1833   | 2.1891  | 0.000302 | 0.00782 | RhGT1        |
| LOC_Os08g41730 | 3.1867    | 7.7800   | 1.2877  | 0.000305 | 0.00789 | PBF1         |
| LOC_Os04g58130 | 12.8967   | 6.3467   | -1.0229 | 0.000309 | 0.00798 | At5g23430    |
| LOC_Os02g47840 | 19.9233   | 43.7833  | 1.1359  | 0.000311 | 0.00803 | At3g01520    |
| LOC_Os03g32314 | 113.7300  | 38.2867  | -1.5707 | 0.000313 | 0.00807 | AOC3         |
| LOC_Os01g03940 | 1.7700    | 0.2933   | -2.5931 | 0.000314 | 0.00809 | -            |
| LOC_Os01g59350 | 10.0200   | 26.9867  | 1.4294  | 0.000317 | 0.00816 | -            |
| LOC_Os08g07730 | 0.1167    | 1.0300   | 3.1422  | 0.000321 | 0.00826 | -            |
| LOC_Os06g02650 | 0.0333    | 0.3833   | 3.5236  | 0.00033  | 0.00846 | -            |
| LOC_Os03g63390 | 1.6433    | 0.1433   | -3.5192 | 0.000332 | 0.0085  | -            |
| LOC_Os01g56810 | 13.6833   | 1.7400   | -2.9753 | 0.000334 | 0.00856 | CKX5         |

|                |         |         |         |          |         |              |
|----------------|---------|---------|---------|----------|---------|--------------|
| LOC_Os11g01550 | 3.7000  | 9.4500  | 1.3528  | 0.000335 | 0.00857 | LBD12        |
| LOC_Os02g12350 | 0.4433  | 1.3467  | 1.6029  | 0.000336 | 0.00859 | -            |
| LOC_Os04g59380 | 1.8300  | 0.4200  | -2.1234 | 0.000339 | 0.00865 | -            |
| LOC_Os01g47410 | 3.4500  | 1.5433  | -1.1605 | 0.000339 | 0.00866 | Os05g0567100 |
| LOC_Os03g26530 | 52.9000 | 22.5267 | -1.2316 | 0.00034  | 0.00866 | KCS12        |
| LOC_Os12g34802 | 3.4533  | 0.8700  | -1.9889 | 0.000341 | 0.00868 | -            |
| LOC_Os08g40060 | 7.4133  | 1.9667  | -1.9144 | 0.000342 | 0.0087  | -            |
| LOC_Os04g53180 | 2.6800  | 0.2433  | -3.4612 | 0.000345 | 0.00876 | -            |
| LOC_Os04g42620 | 25.8933 | 9.2267  | -1.4887 | 0.000346 | 0.00879 | LRX4         |
| LOC_Os11g12290 | 1.7833  | 0.3400  | -2.3910 | 0.000348 | 0.00881 | -            |
| LOC_Os12g03594 | 2.2567  | 0.9800  | -1.2033 | 0.000348 | 0.00882 | PP2B10       |
| LOC_Os09g37344 | 3.9667  | 8.8800  | 1.1626  | 0.000352 | 0.00889 | -            |
| LOC_Os10g23240 | 1.7867  | 11.6367 | 2.7033  | 0.000353 | 0.00889 | -            |
| LOC_Os12g41710 | 20.4633 | 48.5000 | 1.2449  | 0.000353 | 0.00889 | At1g56140    |
| LOC_Os06g39880 | 0.9833  | 0.1333  | -2.8826 | 0.000353 | 0.00889 | CYP734A4     |
| LOC_Os08g16359 | 2.4733  | 0.3533  | -2.8074 | 0.000353 | 0.00889 | -            |
| LOC_Os01g03870 | 2.3933  | 6.3833  | 1.4153  | 0.000353 | 0.00889 | -            |
| LOC_Os08g15149 | 27.8200 | 6.9900  | -1.9928 | 0.000355 | 0.00892 | -            |
| LOC_Os04g38042 | 14.6367 | 3.8267  | -1.9354 | 0.000355 | 0.00892 | -            |
| LOC_Os10g23090 | 1.7500  | 8.3733  | 2.2584  | 0.000355 | 0.00892 | HOX8         |
| LOC_Os03g52040 | 15.3500 | 5.0500  | -1.6039 | 0.000358 | 0.00898 | SCPL18       |
| LOC_Os04g51830 | 0.1767  | 0.0010  | -7.4649 | 0.000361 | 0.00903 | HKT7         |
| LOC_Os01g69290 | 0.6867  | 0.0867  | -2.9861 | 0.000361 | 0.00903 | -            |
| LOC_Os07g04980 | 0.7133  | 2.0733  | 1.5393  | 0.000361 | 0.00903 | -            |
| LOC_Os01g67240 | 4.8367  | 1.7233  | -1.4888 | 0.000362 | 0.00905 | FH1          |
| LOC_Os07g33000 | 0.1067  | 0.0010  | -6.7370 | 0.000363 | 0.00906 | -            |
| LOC_Os07g46870 | 7.0200  | 1.7000  | -2.0459 | 0.000369 | 0.00919 | SDR3b        |
| LOC_Os11g24484 | 0.7533  | 0.1300  | -2.5348 | 0.000369 | 0.00919 | KCR1         |
| MSTRG.22000    | 3.1233  | 1.1133  | -1.4882 | 0.000371 | 0.00921 | --           |
| LOC_Os04g27430 | 1.2000  | 0.0800  | -3.9069 | 0.000371 | 0.00921 | -            |
| LOC_Os02g58214 | 3.9167  | 0.8433  | -2.2155 | 0.000372 | 0.00922 | -            |
| LOC_Os03g10680 | 2.6800  | 0.9500  | -1.4962 | 0.000375 | 0.00929 | FH8          |
| LOC_Os12g27830 | 0.0400  | 0.6100  | 3.9307  | 0.000376 | 0.00929 | HSD1         |
| LOC_Os10g25130 | 30.3167 | 62.5400 | 1.0447  | 0.000378 | 0.00935 | -            |
| LOC_Os06g06760 | 6.4867  | 3.0100  | -1.1077 | 0.000379 | 0.00936 | PUB33        |
| LOC_Os03g61270 | 0.8467  | 3.1633  | 1.9016  | 0.000379 | 0.00936 | MAN3         |
| LOC_Os02g20850 | 1.5900  | 0.3600  | -2.1430 | 0.000383 | 0.00943 | RAC7         |
| LOC_Os07g13390 | 0.4933  | 0.1667  | -1.5656 | 0.000388 | 0.00954 | At1g48120    |
| LOC_Os03g58300 | 24.1067 | 3.6633  | -2.7182 | 0.000389 | 0.00956 | BX1          |
| LOC_Os09g22490 | 15.1400 | 7.0033  | -1.1123 | 0.000391 | 0.0096  | -            |
| LOC_Os01g53370 | 2.2967  | 0.4467  | -2.3623 | 0.000392 | 0.00961 | RhGT1        |
| LOC_Os05g41240 | 27.8533 | 65.0533 | 1.2238  | 0.000397 | 0.00972 | PHL1         |
| LOC_Os05g30350 | 11.2267 | 38.4367 | 1.7756  | 0.000398 | 0.00974 | BGLU22       |

|                |          |         |         |          |         |              |
|----------------|----------|---------|---------|----------|---------|--------------|
| LOC_Os12g03240 | 6.3833   | 1.4867  | -2.1022 | 0.000399 | 0.00975 | -            |
| LOC_Os07g07300 | 13.2100  | 5.3967  | -1.2915 | 0.000401 | 0.00978 | -            |
| LOC_Os05g35440 | 7.2467   | 14.8467 | 1.0347  | 0.000401 | 0.00979 | SHM7         |
| LOC_Os04g33990 | 38.7600  | 13.2500 | -1.5486 | 0.000405 | 0.00986 | YLS9         |
| LOC_Os07g24190 | 100.2000 | 31.0433 | -1.6905 | 0.000408 | 0.00993 | CESA3        |
| LOC_Os01g61380 | 1.8533   | 7.3833  | 1.9941  | 0.000412 | 0.01002 | At3g47520    |
| LOC_Os07g35940 | 8.7567   | 2.4933  | -1.8123 | 0.000416 | 0.0101  | BMY1         |
| LOC_Os02g18070 | 1.6200   | 0.4900  | -1.7251 | 0.000417 | 0.01011 | RGA2         |
| LOC_Os10g36650 | 7.5800   | 2.9700  | -1.3517 | 0.00042  | 0.01018 | ACT2         |
| LOC_Os07g36570 | 13.1667  | 2.3567  | -2.4821 | 0.000425 | 0.01026 | B120         |
| LOC_Os09g38320 | 13.4967  | 4.1633  | -1.6968 | 0.000426 | 0.01028 | PSY          |
| LOC_Os10g08026 | 1.1133   | 0.1533  | -2.8601 | 0.00043  | 0.01037 | Os03g0232800 |
| LOC_Os03g40170 | 0.4400   | 1.2767  | 1.5368  | 0.000435 | 0.01047 | At3g02290    |
| MSTRG.26335    | 1.2700   | 3.2467  | 1.3541  | 0.000435 | 0.01047 | --           |
| LOC_Os01g67190 | 7.2800   | 2.2367  | -1.7026 | 0.000435 | 0.01047 | RNS2         |
| LOC_Os02g14680 | 7.8400   | 2.9233  | -1.4232 | 0.000439 | 0.01056 | UGT72B1      |
| LOC_Os03g11650 | 14.0400  | 6.8700  | -1.0312 | 0.000442 | 0.01061 | MAP70.4      |
| LOC_Os01g55240 | 5.9233   | 0.7267  | -3.0270 | 0.000442 | 0.01061 | GA2OX1       |
| LOC_Os07g32020 | 29.1500  | 9.2833  | -1.6508 | 0.000443 | 0.01062 | GT1          |
| LOC_Os09g07140 | 2.4233   | 0.4100  | -2.5633 | 0.000443 | 0.01062 | -            |
| MSTRG.22412    | 17.0633  | 5.1233  | -1.7357 | 0.000445 | 0.01063 | --           |
| LOC_Os03g47810 | 1.3767   | 0.4133  | -1.7358 | 0.000445 | 0.01063 | NFD4         |
| LOC_Os05g25680 | 10.5400  | 21.9267 | 1.0568  | 0.000445 | 0.01063 | -            |
| LOC_Os02g41450 | 0.4767   | 0.0010  | -8.8968 | 0.000451 | 0.01075 | NAC031       |
| MSTRG.27573    | 1.6367   | 0.2033  | -3.0088 | 0.000453 | 0.01078 | --           |
| LOC_Os10g38660 | 0.9100   | 0.0333  | -4.7708 | 0.000455 | 0.01081 | GSTU6        |
| LOC_Os07g28850 | 5.4833   | 1.5233  | -1.8478 | 0.000457 | 0.01085 | AGO18        |
| LOC_Os01g07420 | 1.5833   | 0.3100  | -2.3526 | 0.000458 | 0.01085 | Mb2734       |
| LOC_Os01g03740 | 2.9933   | 1.1467  | -1.3843 | 0.000461 | 0.01092 | ENDO2        |
| LOC_Os03g52630 | 65.8067  | 26.4233 | -1.3164 | 0.000462 | 0.01093 | GLU2         |
| LOC_Os02g43670 | 17.2733  | 6.6733  | -1.3721 | 0.000465 | 0.01098 | CER26L       |
| LOC_Os04g57800 | 1.9067   | 0.7933  | -1.2651 | 0.000466 | 0.01101 | At3g19850    |
| LOC_Os01g43372 | 27.8667  | 58.3367 | 1.0659  | 0.000468 | 0.01105 | WRKY19       |
| LOC_Os09g32010 | 2.0333   | 0.9400  | -1.1131 | 0.000469 | 0.01106 | -            |
| LOC_Os05g24770 | 0.1000   | 1.1167  | 3.4811  | 0.00047  | 0.01107 | RTNLB1       |
| LOC_Os08g38910 | 149.1033 | 37.7633 | -1.9813 | 0.00047  | 0.01107 | ROMT-17      |
| LOC_Os11g05740 | 0.3933   | 0.0233  | -4.0753 | 0.000471 | 0.01108 | Os11g0156000 |
| LOC_Os08g09840 | 10.5633  | 3.7200  | -1.5057 | 0.000473 | 0.0111  | Os03g0733400 |
| LOC_Os03g62480 | 1.0133   | 4.0667  | 2.0047  | 0.000476 | 0.01117 | RhGT1        |
| LOC_Os10g32680 | 22.2433  | 56.3200 | 1.3403  | 0.000482 | 0.01128 | -            |
| LOC_Os05g05020 | 8.8733   | 2.1400  | -2.0519 | 0.000482 | 0.01128 | -            |
| LOC_Os05g04584 | 5.6133   | 2.1400  | -1.3912 | 0.000482 | 0.01128 | TAX10        |
| LOC_Os03g40210 | 2.6333   | 11.0533 | 2.0695  | 0.000486 | 0.01136 | -            |



|                |          |          |         |          |                      |
|----------------|----------|----------|---------|----------|----------------------|
| LOC_Os11g04540 | 0.8100   | 0.1433   | -2.4985 | 0.000487 | 0.01138 SOT1         |
| LOC_Os08g15710 | 1.3033   | 0.0833   | -3.9672 | 0.000504 | 0.01174 -            |
| LOC_Os09g26780 | 25.7333  | 7.0400   | -1.8700 | 0.000506 | 0.01177 TIFY10A      |
| LOC_Os03g15020 | 32.9033  | 78.0067  | 1.2454  | 0.000506 | 0.01177 Os03g0255100 |
| LOC_Os02g31860 | 8.7933   | 2.9500   | -1.5757 | 0.000508 | 0.0118 -             |
| LOC_Os12g01590 | 24.0000  | 48.3967  | 1.0119  | 0.000508 | 0.0118 -             |
| LOC_Os03g62670 | 27.3633  | 7.4667   | -1.8737 | 0.000509 | 0.0118 HOL3          |
| LOC_Os02g40900 | 6.5800   | 13.5433  | 1.0414  | 0.000514 | 0.01189 RBM42        |
| LOC_Os04g32540 | 4.2200   | 1.1900   | -1.8263 | 0.000522 | 0.01207 SCPL45       |
| LOC_Os12g02330 | 255.0433 | 117.2767 | -1.1208 | 0.000523 | 0.01207 LTP3         |
| LOC_Os01g67870 | 2.2800   | 5.9733   | 1.3895  | 0.000527 | 0.01215 -            |
| LOC_Os02g37280 | 4.0700   | 1.3900   | -1.5499 | 0.00053  | 0.01221 -            |
| LOC_Os07g22730 | 0.0167   | 0.5367   | 5.0090  | 0.000536 | 0.01233 ERF1B        |
| LOC_Os05g09280 | 1.3933   | 0.3100   | -2.1682 | 0.000541 | 0.01244 -            |
| LOC_Os01g11570 | 7.4933   | 15.6967  | 1.0668  | 0.000541 | 0.01245 At5g45920    |
| LOC_Os06g04070 | 63.1600  | 21.3067  | -1.5677 | 0.000545 | 0.01252 ADC1         |
| LOC_Os08g33720 | 35.8300  | 10.2867  | -1.8004 | 0.000546 | 0.01253 At3g47520    |
| LOC_Os04g10940 | 1.1533   | 0.2100   | -2.4573 | 0.000549 | 0.01259 -            |
| LOC_Os08g24750 | 0.5933   | 2.5567   | 2.1073  | 0.000551 | 0.01262 FT1          |
| LOC_Os06g50830 | 0.5533   | 0.0933   | -2.5677 | 0.000553 | 0.01266 FD           |
| LOC_Os11g04350 | 0.4367   | 0.0533   | -3.0334 | 0.000557 | 0.01272 CXE17        |
| LOC_Os05g35594 | 12.5733  | 5.7300   | -1.1338 | 0.000558 | 0.01273 NPF5.10      |
| LOC_Os06g46350 | 2.0600   | 0.3700   | -2.4770 | 0.000569 | 0.01297 PLP7         |
| LOC_Os12g41680 | 9.7700   | 19.5833  | 1.0032  | 0.000575 | 0.01307 NAC021       |
| LOC_Os06g49890 | 15.3800  | 5.5033   | -1.4827 | 0.000583 | 0.01325 FMP32        |
| LOC_Os06g21280 | 0.2733   | 0.0300   | -3.1876 | 0.000585 | 0.01328 -            |
| LOC_Os01g11700 | 0.2900   | 0.0100   | -4.8580 | 0.000585 | 0.01328 At2g27360    |
| LOC_Os04g48840 | 13.2533  | 5.7000   | -1.2173 | 0.00059  | 0.01337 FAX4         |
| LOC_Os07g48790 | 0.2333   | 0.0010   | -7.8662 | 0.000592 | 0.01341 KINB1        |
| LOC_Os06g36050 | 4.9800   | 1.9800   | -1.3306 | 0.000594 | 0.01343 -            |
| LOC_Os01g57340 | 1.6767   | 0.7933   | -1.0796 | 0.000596 | 0.01347 RGA2         |
| LOC_Os09g39930 | 1.7033   | 3.6767   | 1.1100  | 0.000599 | 0.01352 PBS1         |
| LOC_Os02g34860 | 26.6333  | 10.3167  | -1.3683 | 0.000607 | 0.01371 UVR8         |
| LOC_Os03g53950 | 21.3433  | 10.2400  | -1.0596 | 0.000608 | 0.01371 SSL3         |
| MSTRG.4225     | 0.6833   | 2.1200   | 1.6334  | 0.00061  | 0.01373 --           |
| LOC_Os06g35960 | 5.1800   | 13.3867  | 1.3698  | 0.000614 | 0.01382 HSFC2B       |
| LOC_Os01g47830 | 0.1567   | 0.0010   | -7.2916 | 0.000615 | 0.01383 -            |
| LOC_Os04g45090 | 40.5300  | 18.1900  | -1.1558 | 0.000623 | 0.01398 Os04g0533500 |
| LOC_Os02g43110 | 1.6000   | 0.1933   | -3.0489 | 0.000625 | 0.01401 MHX2         |
| LOC_Os03g51350 | 4.1300   | 23.7133  | 2.5215  | 0.000627 | 0.01402 -            |
| LOC_Os01g25560 | 12.8667  | 3.8233   | -1.7507 | 0.000627 | 0.01402 RALFL33      |
| LOC_Os10g21590 | 0.9933   | 5.3700   | 2.4346  | 0.000627 | 0.01402 PLT6         |
| LOC_Os12g08920 | 4.3233   | 1.5967   | -1.4371 | 0.000628 | 0.01402 PER43        |

|                |         |          |         |          |                   |
|----------------|---------|----------|---------|----------|-------------------|
| LOC_Os01g52830 | 0.0333  | 0.5767   | 4.1127  | 0.000628 | 0.01402 -         |
| LOC_Os11g10870 | 4.8567  | 1.4667   | -1.7274 | 0.000631 | 0.01406 DIR19     |
| LOC_Os08g32550 | 0.5900  | 3.1333   | 2.4089  | 0.000634 | 0.01413 -         |
| LOC_Os05g39800 | 10.1333 | 4.0400   | -1.3267 | 0.000635 | 0.01414 NFD4      |
| LOC_Os02g42940 | 7.8267  | 17.7400  | 1.1805  | 0.00064  | 0.01425 PVA12     |
| LOC_Os04g46110 | 0.7433  | 0.0333   | -4.4790 | 0.000642 | 0.01426 -         |
| LOC_Os09g34150 | 10.0267 | 2.6300   | -1.9307 | 0.000642 | 0.01427 RPM1      |
| LOC_Os11g42030 | 3.7500  | 1.4200   | -1.4010 | 0.000646 | 0.01435 -         |
| LOC_Os04g43200 | 19.3700 | 62.8867  | 1.6989  | 0.000657 | 0.01458 PXG       |
| LOC_Os04g49980 | 1.4033  | 8.1767   | 2.5427  | 0.000658 | 0.01458 -         |
| LOC_Os11g14400 | 1.0967  | 0.1300   | -3.0765 | 0.000661 | 0.01464 -         |
| LOC_Os05g18446 | 0.9467  | 2.9733   | 1.6512  | 0.000663 | 0.01466 -         |
| LOC_Os01g02360 | 0.2267  | 0.8267   | 1.8667  | 0.000673 | 0.01488 At5g39020 |
| LOC_Os11g04210 | 13.9667 | 6.3533   | -1.1364 | 0.000674 | 0.01488 HMGCL     |
| LOC_Os01g19170 | 3.5900  | 1.3167   | -1.4471 | 0.000675 | 0.0149 At1g48100  |
| LOC_Os01g47300 | 0.2100  | 1.1133   | 2.4064  | 0.000676 | 0.01491 -         |
| LOC_Os11g17480 | 10.8000 | 3.9433   | -1.4535 | 0.000681 | 0.01501 -         |
| LOC_Os11g20080 | 0.5333  | 0.0200   | -4.7370 | 0.000686 | 0.0151 OMT2       |
| LOC_Os06g03580 | 42.6667 | 14.8033  | -1.5272 | 0.000688 | 0.01512 BB        |
| LOC_Os06g36680 | 0.2267  | 0.0300   | -2.9175 | 0.000689 | 0.01513 ATH1      |
| LOC_Os01g64520 | 51.4933 | 119.6800 | 1.2167  | 0.000694 | 0.01522 At2g26230 |
| LOC_Os04g33560 | 0.7267  | 0.0933   | -2.9608 | 0.000698 | 0.01529 ZPR4      |
| LOC_Os02g54640 | 11.2800 | 3.0267   | -1.8980 | 0.000699 | 0.0153 GLR2.7     |
| MSTRG.21766    | 0.2200  | 1.0967   | 2.3175  | 0.0007   | 0.0153 --         |
| LOC_Os05g10620 | 3.8967  | 8.7800   | 1.1720  | 0.0007   | 0.0153 NAC073     |
| LOC_Os09g21180 | 14.6267 | 32.9100  | 1.1699  | 0.000702 | 0.01533 HOX25     |
| LOC_Os02g43330 | 2.2833  | 16.4900  | 2.8524  | 0.000703 | 0.01534 HOX24     |
| LOC_Os02g33944 | 2.3267  | 1.0567   | -1.1387 | 0.000705 | 0.01538 -         |
| LOC_Os01g65620 | 0.1667  | 1.1033   | 2.7268  | 0.000706 | 0.01539 -         |
| LOC_Os09g31300 | 22.6833 | 54.0533  | 1.2528  | 0.000707 | 0.01539 BHLH130   |
| LOC_Os08g38092 | 3.7033  | 1.6633   | -1.1547 | 0.000708 | 0.01539 abhd17c   |
| LOC_Os09g22480 | 7.3833  | 2.7733   | -1.4127 | 0.000712 | 0.01547 -         |
| LOC_Os12g02810 | 14.1300 | 5.0067   | -1.4968 | 0.000713 | 0.01548 At5g01020 |
| LOC_Os07g37230 | 24.7167 | 11.8200  | -1.0643 | 0.000713 | 0.01548 SAL1      |
| LOC_Os12g13300 | 2.3933  | 0.5967   | -2.0040 | 0.000714 | 0.01549 At1g66830 |
| LOC_Os01g48020 | 0.9500  | 0.2733   | -1.7973 | 0.000718 | 0.01553 At1g34300 |
| LOC_Os02g32690 | 0.0467  | 0.4233   | 3.1813  | 0.000718 | 0.01553 ABCG41    |
| LOC_Os01g70710 | 58.4067 | 126.1700 | 1.1112  | 0.00072  | 0.01554 -         |
| LOC_Os01g64020 | 10.6167 | 23.4567  | 1.1437  | 0.00072  | 0.01554 -         |
| LOC_Os12g03640 | 0.0900  | 0.4333   | 2.2675  | 0.00072  | 0.01554 At1g34300 |
| LOC_Os08g14190 | 13.6100 | 4.1000   | -1.7310 | 0.000722 | 0.01556 SOT1      |
| LOC_Os02g04640 | 14.2167 | 30.7500  | 1.1130  | 0.000728 | 0.01568 PHL1      |
| LOC_Os04g24110 | 23.0167 | 6.9300   | -1.7318 | 0.000734 | 0.01578 UGT90A1   |

|                |          |          |         |          |                      |
|----------------|----------|----------|---------|----------|----------------------|
| LOC_Os01g57700 | 2.4767   | 0.6767   | -1.8719 | 0.000734 | 0.01578 -            |
| LOC_Os10g37720 | 2.1867   | 0.6867   | -1.6711 | 0.000734 | 0.01578 -            |
| LOC_Os03g60190 | 6.1567   | 2.4567   | -1.3254 | 0.000739 | 0.01585 alkB         |
| LOC_Os09g10340 | 3.4900   | 0.6700   | -2.3810 | 0.000749 | 0.01605 CYP71D55     |
| LOC_Os01g13280 | 1.4167   | 3.0900   | 1.1251  | 0.000749 | 0.01605 UBC26        |
| LOC_Os12g24320 | 2.9633   | 0.9567   | -1.6311 | 0.000753 | 0.01613 bcs11b       |
| LOC_Os03g41330 | 43.1467  | 150.1600 | 1.7992  | 0.000754 | 0.01613 LBD37        |
| LOC_Os02g50320 | 5.0433   | 2.4333   | -1.0514 | 0.000755 | 0.01614 MAP70.2      |
| LOC_Os01g62610 | 0.5867   | 2.0467   | 1.8027  | 0.000759 | 0.01621 FKBP20-1     |
| LOC_Os03g05370 | 0.0167   | 0.4900   | 4.8777  | 0.00076  | 0.01621 -            |
| LOC_Os08g32960 | 0.1633   | 0.0010   | -7.3517 | 0.000762 | 0.01625 IP5P9        |
| LOC_Os12g43820 | 9.5333   | 3.9267   | -1.2797 | 0.000763 | 0.01625 -            |
| LOC_Os08g28790 | 26.6933  | 7.3233   | -1.8659 | 0.000764 | 0.01626 DIR1         |
| LOC_Os02g17940 | 7.9367   | 3.7433   | -1.0842 | 0.000773 | 0.01642 SRG1         |
| LOC_Os09g20540 | 1.6033   | 0.5133   | -1.6431 | 0.000775 | 0.01646 -            |
| LOC_Os03g02190 | 12.8600  | 1.9067   | -2.7538 | 0.00078  | 0.01653 At1g33260    |
| LOC_Os07g49250 | 0.1133   | 0.0010   | -6.8244 | 0.000783 | 0.0166 PDC3          |
| LOC_Os03g17850 | 6.7800   | 2.1900   | -1.6304 | 0.000786 | 0.01664 Os03g0287800 |
| LOC_Os05g29676 | 2.5933   | 8.7400   | 1.7528  | 0.000791 | 0.01672 ATL11        |
| LOC_Os02g34430 | 2.3633   | 1.1567   | -1.0308 | 0.000792 | 0.01673 At1g01540    |
| LOC_Os03g02050 | 0.4100   | 2.2133   | 2.4325  | 0.000796 | 0.01679 LTP-2        |
| LOC_Os04g52190 | 7.7600   | 2.1933   | -1.8229 | 0.000797 | 0.0168 VSR7          |
| LOC_Os08g01480 | 0.0100   | 0.3833   | 5.2605  | 0.000798 | 0.0168 CYP71C4       |
| LOC_Os02g11770 | 122.7600 | 46.5567  | -1.3988 | 0.000799 | 0.01682 -            |
| MSTRG.10455    | 0.0400   | 0.8133   | 4.3458  | 0.0008   | 0.01683 --           |
| LOC_Os10g33780 | 2.7233   | 0.8667   | -1.6518 | 0.000801 | 0.01683 G1L5         |
| LOC_Os02g55320 | 10.3733  | 21.4533  | 1.0483  | 0.000802 | 0.01685 ARR12        |
| LOC_Os12g29580 | 3.5233   | 1.7067   | -1.0458 | 0.000804 | 0.01686 KIPK         |
| LOC_Os06g17490 | 0.4600   | 0.1000   | -2.2016 | 0.000809 | 0.01697 LECRKS7      |
| LOC_Os09g36320 | 16.5567  | 3.6100   | -2.1973 | 0.000818 | 0.01711 At5g47070    |
| LOC_Os08g09830 | 1.3433   | 0.5333   | -1.3327 | 0.000818 | 0.01711 BPM1         |
| LOC_Os01g21560 | 16.7467  | 6.2633   | -1.4189 | 0.000819 | 0.01711 CSE          |
| LOC_Os03g48560 | 1.3500   | 0.5100   | -1.4044 | 0.000819 | 0.01711 Xylt1        |
| LOC_Os02g52450 | 31.3400  | 13.3000  | -1.2366 | 0.000822 | 0.01716 TTHA1322     |
| LOC_Os12g04424 | 7.9400   | 3.2200   | -1.3021 | 0.000823 | 0.01716 SSL10        |
| LOC_Os07g01110 | 0.1267   | 0.0010   | -6.9849 | 0.000824 | 0.01718 LAC14        |
| LOC_Os02g14760 | 15.0367  | 32.9067  | 1.1299  | 0.000825 | 0.01718 CID9         |
| LOC_Os09g21380 | 4.2567   | 1.4567   | -1.5471 | 0.000832 | 0.01732 -            |
| LOC_Os03g07170 | 0.2333   | 1.2033   | 2.3666  | 0.000835 | 0.01737 MFSD12       |
| LOC_Os06g51070 | 22.1267  | 8.1767   | -1.4362 | 0.000837 | 0.01738 NAC68        |
| LOC_Os08g10130 | 2.5467   | 0.5400   | -2.2376 | 0.000854 | 0.0177 -             |
| LOC_Os01g39330 | 6.7533   | 1.4867   | -2.1835 | 0.000858 | 0.01777 BHLH         |
| LOC_Os10g38910 | 14.9567  | 3.6067   | -2.0521 | 0.000859 | 0.01778 PAM68        |

|                |         |          |         |          |                      |
|----------------|---------|----------|---------|----------|----------------------|
| LOC_Os06g50600 | 0.6600  | 0.1667   | -1.9855 | 0.00086  | 0.0178 FD            |
| LOC_Os04g43560 | 0.6367  | 0.0800   | -2.9925 | 0.000864 | 0.01784 NAC054       |
| LOC_Os03g06520 | 45.8433 | 15.3933  | -1.5744 | 0.000864 | 0.01784 SULTR3;1     |
| LOC_Os04g37680 | 0.9533  | 0.0467   | -4.3525 | 0.000865 | 0.01785 CXE2         |
| LOC_Os04g57180 | 1.6300  | 4.0000   | 1.2951  | 0.000869 | 0.01792 H6H          |
| LOC_Os05g46480 | 28.4200 | 186.6667 | 2.7155  | 0.000876 | 0.01805 LEA3         |
| LOC_Os02g53620 | 2.3700  | 1.0367   | -1.1929 | 0.000885 | 0.01821 NFYA5        |
| MSTRG.7333     | 0.3467  | 0.0133   | -4.7004 | 0.000886 | 0.01823 WAK1         |
| LOC_Os09g29520 | 6.1333  | 2.4467   | -1.3259 | 0.000891 | 0.01831 WAK3         |
| LOC_Os06g04870 | 3.5867  | 1.2467   | -1.5246 | 0.000899 | 0.01846 HOX2         |
| LOC_Os02g44320 | 20.9000 | 0.3033   | -6.1065 | 0.000901 | 0.0185 -             |
| LOC_Os01g21590 | 2.8267  | 12.3200  | 2.1238  | 0.000905 | 0.01855 -            |
| LOC_Os10g10080 | 18.0000 | 8.0100   | -1.1681 | 0.000905 | 0.01855 GUT1         |
| LOC_Os08g07970 | 9.5567  | 19.9267  | 1.0601  | 0.000907 | 0.01857 TGA4         |
| LOC_Os08g33160 | 32.6167 | 14.0233  | -1.2178 | 0.000908 | 0.01858 TIFY6B       |
| LOC_Os05g37600 | 2.5333  | 0.8133   | -1.6391 | 0.000912 | 0.01863 GPAT6        |
| LOC_Os07g12890 | 12.7800 | 2.7800   | -2.2007 | 0.000913 | 0.01864 ZIP8         |
| MSTRG.5533     | 0.8767  | 0.0900   | -3.2840 | 0.000918 | 0.01874 --           |
| LOC_Os10g40810 | 5.2733  | 2.0933   | -1.3329 | 0.000928 | 0.01892 GATA2        |
| LOC_Os01g04620 | 6.6200  | 2.3400   | -1.5003 | 0.000934 | 0.01902 ntpR         |
| LOC_Os05g02070 | 50.9533 | 24.4767  | -1.0578 | 0.000935 | 0.01902 -            |
| LOC_Os03g04650 | 52.7467 | 20.3933  | -1.3710 | 0.000944 | 0.0192 CYP96A15      |
| LOC_Os04g37570 | 0.6567  | 2.4167   | 1.8798  | 0.000948 | 0.01925 nep2         |
| LOC_Os04g35520 | 53.7400 | 135.3667 | 1.3328  | 0.000953 | 0.01933 APX7         |
| LOC_Os05g50340 | 18.4867 | 3.4600   | -2.4176 | 0.000959 | 0.01942 RL6          |
| LOC_Os01g19210 | 0.0867  | 0.0010   | -6.4374 | 0.000962 | 0.01947 Os03g0733400 |
| LOC_Os04g39010 | 40.2800 | 6.4067   | -2.6524 | 0.000962 | 0.01947 -            |
| LOC_Os01g48640 | 5.3167  | 2.2100   | -1.2665 | 0.000964 | 0.01949 -            |
| LOC_Os01g52610 | 0.2767  | 1.1833   | 2.0966  | 0.000968 | 0.01955 Os01g0725400 |
| LOC_Os06g18790 | 19.8833 | 6.3067   | -1.6566 | 0.000978 | 0.01971 UGT88A1      |
| LOC_Os11g14480 | 0.3533  | 0.0010   | -8.4649 | 0.000996 | 0.02003 ASB11        |
| LOC_Os07g41050 | 0.8967  | 0.0600   | -3.9015 | 0.001006 | 0.02017 VEPI         |
| LOC_Os08g16660 | 0.1267  | 0.0010   | -6.9849 | 0.001006 | 0.02017 ASPG2        |
| LOC_Os05g27350 | 0.7567  | 4.5433   | 2.5860  | 0.001006 | 0.02017 -            |
| LOC_Os04g29090 | 12.9100 | 4.8000   | -1.4274 | 0.001015 | 0.02033 GULLO5       |
| LOC_Os12g14480 | 1.1533  | 0.1133   | -3.3472 | 0.001017 | 0.02035 CRK21        |
| LOC_Os10g05980 | 7.0600  | 0.1267   | -5.8006 | 0.001021 | 0.0204 PRP4          |
| LOC_Os04g32510 | 3.9167  | 1.2633   | -1.6324 | 0.001021 | 0.0204 DRIP2         |
| LOC_Os11g42220 | 18.5133 | 0.3833   | -5.5938 | 0.001024 | 0.02045 LAC20        |
| LOC_Os05g03500 | 0.2400  | 0.9200   | 1.9386  | 0.001027 | 0.02049 LIMYB        |
| LOC_Os06g35970 | 13.4267 | 0.4067   | -5.0451 | 0.00103  | 0.02055 PDF1         |
| LOC_Os03g09850 | 2.0733  | 0.9367   | -1.1463 | 0.001035 | 0.0206 At2g04850     |
| LOC_Os08g04340 | 3.2433  | 0.5500   | -2.5600 | 0.001037 | 0.02064 -            |

|                |          |          |         |          |                      |
|----------------|----------|----------|---------|----------|----------------------|
| LOC_Os01g37460 | 7.9933   | 1.4700   | -2.4430 | 0.001038 | 0.02064 VAR3         |
| LOC_Os04g57380 | 2.5467   | 5.2567   | 1.0455  | 0.001043 | 0.02071 Os04g0669600 |
| LOC_Os10g36060 | 13.7033  | 6.3200   | -1.1165 | 0.001044 | 0.02071 -            |
| LOC_Os07g42370 | 485.0833 | 165.6433 | -1.5502 | 0.001046 | 0.02075 TIFY10A      |
| LOC_Os08g31250 | 0.8833   | 0.1767   | -2.3219 | 0.001048 | 0.02077 Os03g0405500 |
| LOC_Os06g42800 | 7.2967   | 3.2533   | -1.1653 | 0.00105  | 0.02079 SRF8         |
| LOC_Os11g10480 | 13.8900  | 41.4133  | 1.5760  | 0.00105  | 0.02079 ADH1         |
| LOC_Os08g13440 | 0.9900   | 0.2133   | -2.2143 | 0.001057 | 0.02091 Os08g0231400 |
| LOC_Os07g13770 | 6.7733   | 2.9333   | -1.2073 | 0.001063 | 0.021 BX9            |
| LOC_Os01g61070 | 2.9100   | 7.8867   | 1.4384  | 0.001064 | 0.02101 ATX1         |
| LOC_Os09g19380 | 2.4967   | 0.8067   | -1.6300 | 0.001072 | 0.02115 At1g51890    |
| LOC_Os02g01590 | 5.7333   | 1.6600   | -1.7882 | 0.001072 | 0.02115 1-SST        |
| LOC_Os03g45170 | 17.5600  | 8.0433   | -1.1264 | 0.001074 | 0.02116 CAT2         |
| LOC_Os01g61690 | 1.4700   | 0.1567   | -3.2300 | 0.00108  | 0.02125 SCPL27       |
| LOC_Os11g04710 | 9.8533   | 2.6133   | -1.9147 | 0.001086 | 0.02135 CYP90A1      |
| LOC_Os01g40280 | 1.8767   | 4.2533   | 1.1804  | 0.001089 | 0.0214 SPBC776.05    |
| LOC_Os10g04090 | 4.0000   | 1.9400   | -1.0439 | 0.001092 | 0.02145 RGA2         |
| LOC_Os01g66740 | 0.2900   | 0.0133   | -4.4429 | 0.001095 | 0.02148 At5g48380    |
| LOC_Os09g38440 | 2.0867   | 0.8000   | -1.3831 | 0.001101 | 0.02155 ATX2         |
| LOC_Os07g29960 | 0.1767   | 0.0010   | -7.4649 | 0.001101 | 0.02155 CYP87A3      |
| LOC_Os04g48460 | 4.4667   | 10.1300  | 1.1814  | 0.001102 | 0.02155 CYP704C1     |
| LOC_Os11g34720 | 0.7633   | 0.0300   | -4.6693 | 0.001102 | 0.02155 PAP4         |
| LOC_Os04g32010 | 1.5133   | 0.5333   | -1.5046 | 0.001106 | 0.02162 ALS2         |
| LOC_Os01g74490 | 2.2300   | 9.6367   | 2.1115  | 0.001107 | 0.02162 ATX1         |
| LOC_Os07g47450 | 14.9167  | 3.2433   | -2.2014 | 0.001112 | 0.0217 Os07g0671000  |
| LOC_Os07g33915 | 4.6900   | 11.9233  | 1.3461  | 0.001113 | 0.02171 RPL36AA      |
| LOC_Os10g33790 | 2.8933   | 0.8500   | -1.7672 | 0.001121 | 0.02185 -            |
| LOC_Os02g46210 | 1.7533   | 0.6033   | -1.5391 | 0.001122 | 0.02186 -            |
| LOC_Os04g34580 | 0.7867   | 0.0933   | -3.0753 | 0.001124 | 0.02188 hpxO         |
| LOC_Os06g03800 | 53.1567  | 16.0433  | -1.7283 | 0.001134 | 0.02206 XBOS36       |
| LOC_Os11g06900 | 3.5967   | 1.5967   | -1.1716 | 0.001136 | 0.02206 FAAH         |
| LOC_Os03g53350 | 0.8933   | 0.1033   | -3.1119 | 0.001142 | 0.02218 TOGT1        |
| LOC_Os03g06700 | 0.2200   | 0.0010   | -7.7814 | 0.001158 | 0.02245 KCS11        |
| MSTRG.1090     | 2.9333   | 0.9767   | -1.5866 | 0.00116  | 0.02248 --           |
| MSTRG.21425    | 1.0767   | 0.0567   | -4.2479 | 0.001168 | 0.02259 --           |
| LOC_Os03g48310 | 2.6067   | 5.8833   | 1.1744  | 0.001169 | 0.02259 LHA1         |
| LOC_Os12g11420 | 2.4367   | 0.1433   | -4.0875 | 0.00117  | 0.02259 -            |
| LOC_Os04g25650 | 1.8033   | 0.6700   | -1.4284 | 0.00117  | 0.02259 CRRSP38      |
| LOC_Os02g57770 | 0.2633   | 0.0010   | -8.0407 | 0.001184 | 0.02285 XTH32        |
| LOC_Os07g31500 | 6.6800   | 3.1000   | -1.1076 | 0.001191 | 0.02297 GSO1         |
| LOC_Os07g32340 | 2.7800   | 1.2433   | -1.1609 | 0.001215 | 0.02339 FPP3         |
| LOC_Os04g31110 | 3.4033   | 1.4833   | -1.1981 | 0.001216 | 0.02339 Y-2          |
| LOC_Os04g35620 | 2.9100   | 6.1300   | 1.0749  | 0.001222 | 0.0235 -             |

|                |          |          |         |          |         |           |
|----------------|----------|----------|---------|----------|---------|-----------|
| LOC_Os09g31230 | 3.6867   | 0.9700   | -1.9263 | 0.001233 | 0.02368 | -         |
| LOC_Os04g48130 | 35.0933  | 9.6433   | -1.8636 | 0.00124  | 0.02379 | RBL6      |
| LOC_Os04g55620 | 2.8367   | 1.2233   | -1.2134 | 0.001242 | 0.02382 | At5g67200 |
| LOC_Os04g55920 | 188.6633 | 85.9000  | -1.1351 | 0.001244 | 0.02383 | TIFY3B    |
| LOC_Os03g62240 | 50.9300  | 108.7867 | 1.0949  | 0.001246 | 0.02386 | -         |
| LOC_Os10g38600 | 3.1167   | 11.4567  | 1.8781  | 0.001248 | 0.02388 | GSTU6     |
| LOC_Os09g31025 | 0.5200   | 1.8933   | 1.8643  | 0.001254 | 0.02399 | -         |
| LOC_Os07g01600 | 24.9267  | 6.9767   | -1.8371 | 0.001264 | 0.02412 | DIR1      |
| LOC_Os04g15630 | 1.8633   | 0.3633   | -2.3585 | 0.001265 | 0.02412 | At3g47570 |
| LOC_Os03g51080 | 118.3700 | 45.0567  | -1.3935 | 0.001271 | 0.02419 | GAD1      |
| LOC_Os07g38450 | 0.5867   | 0.1233   | -2.2500 | 0.001281 | 0.02437 | AtMg00310 |
| LOC_Os05g49950 | 0.3033   | 1.4333   | 2.2404  | 0.001282 | 0.02437 | -         |
| LOC_Os01g45860 | 2.6800   | 1.0900   | -1.2979 | 0.001295 | 0.02457 | GAI       |
| LOC_Os05g30940 | 0.4333   | 0.0133   | -5.0224 | 0.001297 | 0.02459 | -         |
| LOC_Os11g26780 | 5.9867   | 36.9533  | 2.6259  | 0.001301 | 0.02464 | RAB16B    |
| LOC_Os12g41140 | 4.5200   | 1.3200   | -1.7758 | 0.001302 | 0.02464 | VAB       |
| LOC_Os03g18370 | 19.2533  | 8.2833   | -1.2168 | 0.00131  | 0.02478 | MRH1      |
| LOC_Os04g33980 | 0.8500   | 0.3667   | -1.2130 | 0.001318 | 0.02487 | -         |
| LOC_Os06g17440 | 10.6333  | 4.4300   | -1.2632 | 0.001318 | 0.02487 | -         |
| LOC_Os11g09180 | 5.3533   | 2.6300   | -1.0254 | 0.00132  | 0.02489 | -         |
| LOC_Os01g46400 | 7.4967   | 3.1000   | -1.2740 | 0.001322 | 0.0249  | TBL19     |
| LOC_Os01g55500 | 3.5733   | 1.0700   | -1.7397 | 0.001325 | 0.02495 | NAT2      |
| LOC_Os12g01550 | 5.2900   | 12.9333  | 1.2898  | 0.001326 | 0.02495 | LBD12     |
| LOC_Os01g66200 | 35.3167  | 15.2667  | -1.2100 | 0.00133  | 0.02498 | -         |
| LOC_Os06g10000 | 4.2667   | 10.8733  | 1.3496  | 0.001338 | 0.02511 | -         |
| LOC_Os12g37600 | 2.0700   | 0.9133   | -1.1804 | 0.00135  | 0.02528 | GPAT3     |
| LOC_Os11g07911 | 1.7667   | 14.2333  | 3.0102  | 0.00135  | 0.02528 | -         |
| LOC_Os02g14160 | 2.4433   | 7.7067   | 1.6573  | 0.001354 | 0.02535 | PER52     |
| LOC_Os03g55350 | 10.2467  | 4.9300   | -1.0555 | 0.001362 | 0.02547 | SBT1.7    |
| LOC_Os03g28170 | 30.3133  | 6.8467   | -2.1465 | 0.001363 | 0.02547 | -         |
| LOC_Os03g61150 | 34.6833  | 103.0033 | 1.5704  | 0.001372 | 0.0256  | -         |
| LOC_Os12g06335 | 0.9267   | 0.1167   | -2.9897 | 0.001378 | 0.02568 | LHW       |
| LOC_Os02g56820 | 0.3467   | 1.1167   | 1.6876  | 0.001385 | 0.0258  | At2g02240 |
| LOC_Os04g35690 | 0.4933   | 0.0933   | -2.4021 | 0.001401 | 0.02608 | OEP61     |
| LOC_Os03g52070 | 22.2900  | 6.2767   | -1.8283 | 0.001412 | 0.02628 | SCPL18    |
| LOC_Os04g36800 | 16.0833  | 7.6900   | -1.0645 | 0.001429 | 0.02658 | KAS12     |
| LOC_Os06g49210 | 3.8900   | 1.4833   | -1.3909 | 0.001434 | 0.02665 | NPF8.3    |
| LOC_Os01g68960 | 0.2933   | 1.1400   | 1.9584  | 0.001435 | 0.02665 | -         |
| LOC_Os01g56235 | 1.3767   | 0.1500   | -3.1981 | 0.001438 | 0.02668 | At4g15545 |
| LOC_Os03g05334 | 0.8933   | 0.1833   | -2.2847 | 0.001442 | 0.02675 | -         |
| LOC_Os03g14440 | 0.3433   | 0.0010   | -8.4235 | 0.001447 | 0.02678 | -         |
| LOC_Os02g03294 | 5.4400   | 1.6333   | -1.7358 | 0.001447 | 0.02678 | CYCP4-1   |
| LOC_Os01g52980 | 4.2900   | 8.7067   | 1.0211  | 0.001455 | 0.02689 | At3g58900 |

|                |          |         |         |          |                     |
|----------------|----------|---------|---------|----------|---------------------|
| LOC_Os10g26940 | 7.0467   | 24.5933 | 1.8033  | 0.001458 | 0.02693 BURP16      |
| LOC_Os05g44070 | 2.4333   | 0.8300  | -1.5518 | 0.001463 | 0.027 RIC2          |
| LOC_Os01g41160 | 0.2100   | 0.0010  | -7.7142 | 0.001476 | 0.02718 FOXRED1     |
| LOC_Os03g45850 | 0.5933   | 0.0010  | -9.2127 | 0.001476 | 0.02718 SAUR72      |
| LOC_Os10g36100 | 1.1333   | 0.1200  | -3.2395 | 0.001476 | 0.02718 LTP-2       |
| LOC_Os01g37920 | 14.2667  | 6.1600  | -1.2116 | 0.001479 | 0.02721 -           |
| LOC_Os12g29500 | 0.9967   | 0.1633  | -2.6093 | 0.001486 | 0.02733 DRIP1       |
| LOC_Os12g05040 | 0.9967   | 0.2667  | -1.9021 | 0.001495 | 0.02747 HIP26       |
| LOC_Os07g38440 | 27.7400  | 13.1333 | -1.0787 | 0.001499 | 0.02752 -           |
| LOC_Os04g38885 | 4.4633   | 1.7000  | -1.3926 | 0.001499 | 0.02752 -           |
| LOC_Os03g29920 | 21.9767  | 8.5300  | -1.3654 | 0.001509 | 0.02769 -           |
| LOC_Os04g37430 | 37.1667  | 11.2867 | -1.7194 | 0.001511 | 0.0277 Os03g0179900 |
| LOC_Os04g01320 | 6.1333   | 3.0600  | -1.0031 | 0.001532 | 0.02805 At2g19130   |
| LOC_Os01g48940 | 13.8133  | 52.0667 | 1.9143  | 0.001533 | 0.02806 -           |
| LOC_Os01g24070 | 53.4667  | 18.7100 | -1.5148 | 0.001552 | 0.02838 GATA23      |
| LOC_Os08g06310 | 0.0767   | 0.0010  | -6.2605 | 0.001553 | 0.02838 Tf2-6       |
| LOC_Os03g36960 | 14.6967  | 6.2767  | -1.2274 | 0.001556 | 0.02841 -           |
| LOC_Os11g05050 | 125.0500 | 33.8133 | -1.8868 | 0.001556 | 0.02841 TSJT1       |
| LOC_Os11g47330 | 25.4767  | 11.6733 | -1.1260 | 0.00156  | 0.02846 ACLA-2      |
| LOC_Os01g72470 | 1.4167   | 0.2200  | -2.6869 | 0.001565 | 0.02853 -           |
| LOC_Os01g08840 | 0.4200   | 0.0010  | -8.7142 | 0.001566 | 0.02853 -           |
| LOC_Os02g46830 | 18.7367  | 6.7367  | -1.4758 | 0.001571 | 0.02862 -           |
| LOC_Os08g06210 | 14.5133  | 2.0133  | -2.8497 | 0.001576 | 0.02868 -           |
| LOC_Os01g49710 | 2.0033   | 4.8500  | 1.2756  | 0.001578 | 0.02868 GSTU6       |
| LOC_Os07g13800 | 0.4700   | 1.1933  | 1.3443  | 0.001578 | 0.02868 UGT76C2     |
| LOC_Os05g39560 | 1.8767   | 0.6233  | -1.5901 | 0.001583 | 0.02875 ZIP5        |
| MSTRG.19461    | 0.1833   | 0.0010  | -7.5183 | 0.001589 | 0.02882 WRKY55      |
| LOC_Os01g19480 | 0.3633   | 0.0467  | -2.9608 | 0.001593 | 0.02889 RABEPK      |
| LOC_Os03g01530 | 7.7900   | 3.3300  | -1.2261 | 0.001595 | 0.02889 TUBB2       |
| LOC_Os04g32480 | 10.5500  | 1.5000  | -2.8142 | 0.001596 | 0.02889 TIFY9       |
| LOC_Os03g57450 | 7.6067   | 2.6533  | -1.5195 | 0.001604 | 0.02902 CPK1        |
| LOC_Os08g37470 | 0.0010   | 0.2233  | 7.8031  | 0.001619 | 0.02926 PCO1        |
| LOC_Os09g32290 | 4.5733   | 12.5100 | 1.4518  | 0.001621 | 0.02927 At2g24580   |
| LOC_Os09g36070 | 2.8333   | 6.7133  | 1.2445  | 0.001624 | 0.02931 CYP71A9     |
| LOC_Os07g04970 | 0.0167   | 0.3800  | 4.5110  | 0.001636 | 0.02947 At3g50280   |
| LOC_Os03g45519 | 0.0567   | 0.0010  | -5.8244 | 0.001638 | 0.02949 CYP87A3     |
| LOC_Os05g11750 | 0.2533   | 0.0433  | -2.5475 | 0.001645 | 0.0296 PBS1         |
| LOC_Os12g05220 | 0.0010   | 0.2633  | 8.0407  | 0.001651 | 0.02968 FH14        |
| LOC_Os07g34950 | 16.1500  | 8.0433  | -1.0057 | 0.001653 | 0.0297 At5g52970    |
| LOC_Os08g19680 | 0.4333   | 0.1167  | -1.8931 | 0.001657 | 0.02975 -           |
| LOC_Os09g07440 | 11.0500  | 2.8133  | -1.9737 | 0.00166  | 0.02979 At3g49630   |
| LOC_Os07g38000 | 14.7167  | 6.0000  | -1.2944 | 0.001667 | 0.0299 petJ         |
| LOC_Os09g39650 | 3.4200   | 1.3300  | -1.3626 | 0.001677 | 0.03002 PUB33       |

|                |          |          |         |          |                      |
|----------------|----------|----------|---------|----------|----------------------|
| LOC_Os11g06650 | 10.4500  | 4.6267   | -1.1755 | 0.001677 | 0.03002 MED26C       |
| LOC_Os11g02530 | 1.2100   | 0.1033   | -3.5496 | 0.001678 | 0.03002 WRKY70       |
| LOC_Os01g12210 | 2.0200   | 0.2500   | -3.0144 | 0.001678 | 0.03002 ALMT9        |
| LOC_Os03g03810 | 1.3533   | 0.1367   | -3.3078 | 0.001688 | 0.03016 -            |
| LOC_Os03g12390 | 86.0000  | 42.4500  | -1.0186 | 0.00169  | 0.03018 MKK7         |
| LOC_Os03g64130 | 0.9533   | 0.3200   | -1.5749 | 0.001706 | 0.03044 -            |
| LOC_Os08g44840 | 1.7767   | 0.4633   | -1.9391 | 0.001708 | 0.03046 DCR          |
| LOC_Os03g49126 | 0.9033   | 1.8267   | 1.0159  | 0.001714 | 0.03054 -            |
| LOC_Os12g11680 | 0.6200   | 0.1900   | -1.7063 | 0.001716 | 0.03056 RLP12        |
| LOC_Os02g51110 | 23.8867  | 11.8900  | -1.0065 | 0.001718 | 0.03058 NIP2-1       |
| LOC_Os02g15860 | 6.5900   | 15.0800  | 1.1943  | 0.001719 | 0.03058 -            |
| LOC_Os09g27060 | 0.3967   | 0.1233   | -1.6854 | 0.001723 | 0.03062 DDM1         |
| LOC_Os03g58020 | 3.2033   | 9.2333   | 1.5273  | 0.001743 | 0.03095 p20          |
| LOC_Os09g15370 | 10.1133  | 22.4800  | 1.1524  | 0.001744 | 0.03095 At2g01680    |
| LOC_Os11g32890 | 0.3300   | 3.9167   | 3.5691  | 0.00175  | 0.03099 -            |
| LOC_Os01g57880 | 1.7367   | 0.3800   | -2.1922 | 0.001751 | 0.03099 At4g27520    |
| LOC_Os02g13870 | 16.2067  | 4.0000   | -2.0185 | 0.001753 | 0.031 NIP1-1         |
| LOC_Os02g10920 | 67.5900  | 26.5100  | -1.3503 | 0.001754 | 0.031 -              |
| LOC_Os03g59210 | 84.0300  | 19.2800  | -2.1238 | 0.00176  | 0.03109 -            |
| LOC_Os10g40450 | 0.1833   | 1.5367   | 3.0673  | 0.001766 | 0.03116 -            |
| LOC_Os03g16290 | 2.8000   | 0.7367   | -1.9263 | 0.001772 | 0.03124 -            |
| LOC_Os01g02010 | 0.9900   | 0.2700   | -1.8745 | 0.001775 | 0.03128 -            |
| LOC_Os02g56920 | 24.5400  | 1.0800   | -4.5060 | 0.001799 | 0.03164 CER1         |
| LOC_Os03g57410 | 0.3900   | 0.0467   | -3.0630 | 0.001799 | 0.03164 ATL70        |
| LOC_Os03g38710 | 0.1233   | 0.0010   | -6.9464 | 0.001806 | 0.03173 PERK1        |
| LOC_Os10g22600 | 0.7967   | 0.2233   | -1.8348 | 0.001806 | 0.03173 RAP2-13      |
| LOC_Os05g25770 | 159.1533 | 34.8567  | -2.1909 | 0.001822 | 0.03194 WRKY70       |
| LOC_Os04g33950 | 2.5333   | 0.8500   | -1.5755 | 0.001822 | 0.03194 E2FB         |
| LOC_Os06g17560 | 0.6400   | 0.1000   | -2.6781 | 0.001825 | 0.03194 -            |
| LOC_Os05g34980 | 9.0367   | 3.4033   | -1.4088 | 0.00183  | 0.03201 AAP2         |
| LOC_Os02g51680 | 0.5600   | 0.1167   | -2.2630 | 0.001832 | 0.03202 TPP4         |
| LOC_Os01g09190 | 0.2300   | 0.0010   | -7.8455 | 0.001839 | 0.03211 -            |
| LOC_Os05g19670 | 0.6067   | 0.1067   | -2.5078 | 0.00185  | 0.03228 Os05g0277500 |
| LOC_Os06g07100 | 2.5533   | 0.9400   | -1.4416 | 0.001867 | 0.03256 ATL46        |
| LOC_Os10g41550 | 57.7267  | 153.0167 | 1.4064  | 0.001875 | 0.03267 BAM3         |
| LOC_Os09g09490 | 1.1600   | 0.4233   | -1.4543 | 0.001878 | 0.03269 RPM1         |
| LOC_Os10g33240 | 0.8033   | 1.6900   | 1.0730  | 0.001881 | 0.03269 -            |
| LOC_Os03g13460 | 27.1433  | 13.4867  | -1.0091 | 0.001881 | 0.03269 MAP65-7      |
| LOC_Os01g47570 | 8.2100   | 22.2367  | 1.4375  | 0.001883 | 0.03271 -            |
| LOC_Os11g44350 | 0.2933   | 0.0067   | -5.4594 | 0.001886 | 0.03273 CBP60F       |
| LOC_Os11g35240 | 0.8067   | 2.0867   | 1.3712  | 0.001887 | 0.03273 WAK5         |
| MSTRG.17146    | 3.3800   | 9.0967   | 1.4283  | 0.001888 | 0.03274 --           |
| LOC_Os03g49750 | 0.3233   | 0.0933   | -1.7926 | 0.001891 | 0.03276 mph1         |



|                |          |         |         |          |         |             |
|----------------|----------|---------|---------|----------|---------|-------------|
| LOC_Os09g35600 | 3.7767   | 0.6500  | -2.5386 | 0.001897 | 0.03284 | DTXL4       |
| LOC_Os08g17160 | 4.3200   | 0.4667  | -3.2106 | 0.0019   | 0.03285 | At5g25090   |
| LOC_Os05g34830 | 8.9367   | 21.1567 | 1.2433  | 0.00191  | 0.03297 | NAC48       |
| LOC_Os09g18594 | 45.7567  | 19.0600 | -1.2634 | 0.001912 | 0.03299 | SIRK        |
| LOC_Os04g55680 | 1.2967   | 0.5033  | -1.3652 | 0.001935 | 0.03333 | UGT89B1     |
| LOC_Os02g30380 | 0.4300   | 0.0067  | -6.0112 | 0.001946 | 0.03346 | IDD14       |
| LOC_Os05g28690 | 0.1633   | 0.0300  | -2.4448 | 0.001946 | 0.03346 | Fam91a1     |
| LOC_Os11g26570 | 4.5433   | 23.7933 | 2.3887  | 0.001957 | 0.03358 | DHN3        |
| LOC_Os01g22230 | 2.7233   | 1.1500  | -1.2437 | 0.001958 | 0.03358 | PER1        |
| LOC_Os03g02840 | 6.9667   | 2.4900  | -1.4843 | 0.001959 | 0.03359 | -           |
| LOC_Os08g28570 | 0.3400   | 0.1133  | -1.5850 | 0.001962 | 0.0336  | RPP13       |
| LOC_Os08g42080 | 0.2933   | 0.0233  | -3.6521 | 0.001963 | 0.0336  | ACR5        |
| LOC_Os12g37690 | 1.6967   | 5.0800  | 1.5821  | 0.001964 | 0.0336  | MYB108      |
| LOC_Os09g25610 | 1.2433   | 0.1500  | -3.0512 | 0.001965 | 0.0336  | guaAA       |
| LOC_Os01g05220 | 3.4100   | 1.5067  | -1.1784 | 0.001967 | 0.03362 | -           |
| MSTRG.23921    | 0.1967   | 0.8700  | 2.1453  | 0.001969 | 0.03363 | --          |
| LOC_Os12g38370 | 0.6400   | 0.0633  | -3.3370 | 0.001995 | 0.03403 | -           |
| LOC_Os05g07420 | 3.5500   | 0.7767  | -2.1925 | 0.001996 | 0.03403 | At2g19130   |
| LOC_Os01g09770 | 29.5600  | 10.0900 | -1.5507 | 0.002032 | 0.03456 | -           |
| LOC_Os07g33650 | 7.3500   | 3.0900  | -1.2501 | 0.00204  | 0.03466 | -           |
| LOC_Os05g05860 | 0.0367   | 0.3233  | 3.1405  | 0.002045 | 0.03472 | NRPB1       |
| LOC_Os02g13980 | 3.5567   | 0.9000  | -1.9825 | 0.002054 | 0.03483 | -           |
| LOC_Os01g52250 | 156.8300 | 39.2433 | -1.9987 | 0.002058 | 0.03487 | SS4         |
| LOC_Os12g42430 | 13.0533  | 5.7167  | -1.1912 | 0.002067 | 0.03497 | IQD1        |
| LOC_Os07g07230 | 7.6367   | 2.9567  | -1.3690 | 0.002068 | 0.03497 | At3g03770   |
| LOC_Os06g31090 | 0.1667   | 1.3133  | 2.9782  | 0.002073 | 0.03503 | POB1        |
| LOC_Os02g56340 | 6.7600   | 2.7033  | -1.3223 | 0.002075 | 0.03504 | -           |
| LOC_Os04g08390 | 0.2833   | 0.1000  | -1.5025 | 0.002084 | 0.03517 | -           |
| LOC_Os12g42910 | 0.3533   | 1.2433  | 1.8151  | 0.002092 | 0.03529 | CCX1        |
| LOC_Os11g29410 | 0.1867   | 1.2000  | 2.6845  | 0.002096 | 0.03532 | -           |
| LOC_Os05g50260 | 0.1000   | 0.4433  | 2.1484  | 0.002104 | 0.03544 | At1g48100   |
| LOC_Os06g43170 | 6.5133   | 2.4900  | -1.3873 | 0.00211  | 0.03551 | At4g34220   |
| LOC_Os10g07998 | 0.0333   | 0.3500  | 3.3923  | 0.002117 | 0.03559 | At1g09380   |
| LOC_Os02g30190 | 9.3000   | 1.4100  | -2.7215 | 0.002121 | 0.03563 | RIN4        |
| LOC_Os03g35940 | 0.0010   | 0.1133  | 6.8244  | 0.002128 | 0.0357  | -           |
| LOC_Os03g45450 | 10.1867  | 2.7967  | -1.8649 | 0.002134 | 0.03577 | WRKY71      |
| LOC_Os12g38760 | 2.3600   | 0.7267  | -1.6994 | 0.002136 | 0.03579 | PAP1        |
| LOC_Os07g34520 | 3.8867   | 24.3267 | 2.6459  | 0.002144 | 0.03586 | ICL         |
| LOC_Os07g25460 | 27.6000  | 67.6667 | 1.2938  | 0.002156 | 0.03605 | Ankrd13b    |
| LOC_Os09g18159 | 0.1267   | 0.0067  | -4.2479 | 0.002171 | 0.03627 | At1g51820   |
| LOC_Os01g43580 | 5.1067   | 2.3133  | -1.1424 | 0.002178 | 0.03637 | KINESIN-13A |
| LOC_Os04g40470 | 2.1300   | 5.7467  | 1.4319  | 0.002189 | 0.0365  | CYP71A9     |
| LOC_Os07g10910 | 3.4267   | 8.1500  | 1.2500  | 0.002193 | 0.03652 | EXO70A1     |

|                |          |          |         |          |         |              |
|----------------|----------|----------|---------|----------|---------|--------------|
| LOC_Os11g37700 | 0.1833   | 1.0100   | 2.4618  | 0.002194 | 0.03652 | ABCG48       |
| LOC_Os04g09770 | 0.3367   | 0.0010   | -8.3952 | 0.002197 | 0.03656 | At5g39020    |
| LOC_Os05g49370 | 74.7767  | 31.2533  | -1.2586 | 0.002204 | 0.03663 | -            |
| LOC_Os02g46100 | 0.7833   | 0.1233   | -2.6671 | 0.002221 | 0.03689 | ATL80        |
| LOC_Os07g34240 | 0.5167   | 0.0067   | -6.2761 | 0.002223 | 0.0369  | HIDM         |
| LOC_Os02g02930 | 3.9167   | 0.0833   | -5.5546 | 0.002225 | 0.0369  | -            |
| LOC_Os08g32160 | 19.7033  | 6.0967   | -1.6923 | 0.002226 | 0.03691 | AOP1.2       |
| LOC_Os08g37990 | 0.7733   | 0.2167   | -1.8356 | 0.002232 | 0.03698 | -            |
| LOC_Os03g02230 | 0.1700   | 1.2167   | 2.8393  | 0.002244 | 0.03716 | -            |
| LOC_Os03g49430 | 0.5833   | 1.7467   | 1.5822  | 0.002248 | 0.0372  | prpf18       |
| LOC_Os04g58020 | 25.4733  | 56.5633  | 1.1509  | 0.002253 | 0.03727 | DIVARICATA   |
| LOC_Os10g40660 | 0.1200   | 0.0010   | -6.9069 | 0.002269 | 0.03749 | ZAT9         |
| LOC_Os02g46560 | 1.2033   | 0.4033   | -1.5770 | 0.002273 | 0.03751 | BHLH96       |
| LOC_Os01g60780 | 3.0367   | 1.1833   | -1.3596 | 0.002273 | 0.03751 | At1g06890    |
| LOC_Os03g18070 | 68.5800  | 17.3933  | -1.9793 | 0.002275 | 0.03751 | FAD7A-1      |
| LOC_Os07g35510 | 88.1167  | 190.4433 | 1.1119  | 0.002282 | 0.03761 | At4g29360    |
| LOC_Os01g53640 | 3.1467   | 1.4167   | -1.1513 | 0.002284 | 0.03762 | PERK9        |
| LOC_Os03g17800 | 3.1600   | 6.5733   | 1.0567  | 0.002295 | 0.03777 | rdgBbeta     |
| LOC_Os10g35050 | 0.1333   | 0.5933   | 2.1538  | 0.002307 | 0.03792 | TIP3-1       |
| LOC_Os03g14654 | 963.8267 | 466.6433 | -1.0465 | 0.002307 | 0.03792 | -            |
| LOC_Os03g05820 | 0.6900   | 1.4333   | 1.0547  | 0.002312 | 0.03798 | Os03g0152900 |
| LOC_Os04g46940 | 1.4200   | 0.5667   | -1.3253 | 0.002314 | 0.03799 | HMA5         |
| LOC_Os05g43240 | 12.3867  | 2.8533   | -2.1181 | 0.002318 | 0.03803 | JAL3         |
| LOC_Os07g35520 | 0.1033   | 0.0010   | -6.6912 | 0.002327 | 0.03814 | At5g56590    |
| LOC_Os01g43480 | 20.1467  | 8.7967   | -1.1955 | 0.002328 | 0.03814 | atad1a       |
| LOC_Os11g04960 | 8.4100   | 3.9867   | -1.0769 | 0.002329 | 0.03814 | NAC029       |
| LOC_Os02g46030 | 3.2067   | 8.5400   | 1.4132  | 0.002337 | 0.03825 | RVE1         |
| LOC_Os01g10930 | 1.0067   | 0.4833   | -1.0585 | 0.002347 | 0.03839 | -            |
| LOC_Os05g33690 | 2.1800   | 0.9267   | -1.2342 | 0.002356 | 0.03849 | ERL1         |
| MSTRG.826      | 0.7067   | 1.8333   | 1.3754  | 0.002374 | 0.03873 | --           |
| LOC_Os08g01670 | 2.5567   | 0.6800   | -1.9107 | 0.002377 | 0.03875 | C/VIF2       |
| LOC_Os03g61620 | 8.5267   | 2.9433   | -1.5345 | 0.002395 | 0.03897 | -            |
| LOC_Os10g02340 | 1.4433   | 0.5033   | -1.5198 | 0.002397 | 0.03897 | NPF8.3       |
| LOC_Os01g64120 | 215.2700 | 497.2633 | 1.2079  | 0.002398 | 0.03897 | FDX6         |
| LOC_Os11g42800 | 9.8467   | 4.1800   | -1.2361 | 0.00241  | 0.03915 | KP1          |
| LOC_Os06g46149 | 54.0333  | 20.1400  | -1.4238 | 0.002413 | 0.03918 | -            |
| LOC_Os11g40780 | 0.3333   | 0.0900   | -1.8890 | 0.002424 | 0.03931 | RGA2         |
| LOC_Os03g29930 | 11.4300  | 4.9067   | -1.2200 | 0.002429 | 0.03936 | -            |
| LOC_Os09g25810 | 0.8367   | 0.2000   | -2.0647 | 0.002442 | 0.03954 | At4g30420    |
| LOC_Os02g51730 | 1.0100   | 0.0067   | -7.2432 | 0.002449 | 0.03962 | TTL3         |
| LOC_Os03g08790 | 1.0367   | 0.2100   | -2.3035 | 0.00245  | 0.03962 | nep1         |
| LOC_Os03g54820 | 0.4733   | 0.0010   | -8.8867 | 0.002461 | 0.03975 | -            |
| LOC_Os10g26540 | 24.6667  | 57.7900  | 1.2283  | 0.002462 | 0.03975 | -            |

|                |         |         |         |          |         |                   |
|----------------|---------|---------|---------|----------|---------|-------------------|
| LOC_Os12g36810 | 0.6367  | 1.4600  | 1.1974  | 0.002469 | 0.03984 | GSVIVT00026920001 |
| LOC_Os11g35080 | 2.5000  | 1.1300  | -1.1456 | 0.002477 | 0.03992 | -                 |
| LOC_Os03g06010 | 0.0010  | 0.2833  | 8.1464  | 0.002483 | 0.03997 | EXPA25            |
| LOC_Os09g34320 | 24.0967 | 8.3967  | -1.5209 | 0.002484 | 0.03997 | -                 |
| LOC_Os04g49194 | 2.7133  | 0.5300  | -2.3560 | 0.002486 | 0.03997 | -                 |
| LOC_Os08g37340 | 0.7667  | 3.7033  | 2.2722  | 0.00249  | 0.03999 | -                 |
| LOC_Os05g05930 | 0.0967  | 1.0567  | 3.4504  | 0.002503 | 0.04016 | TSPO              |
| LOC_Os09g29120 | 0.3433  | 0.0010  | -8.4235 | 0.002509 | 0.04019 | GEM               |
| LOC_Os01g19750 | 0.9167  | 0.2267  | -2.0158 | 0.002511 | 0.04019 | SE2               |
| LOC_Os01g25360 | 1.4333  | 0.5400  | -1.4083 | 0.002521 | 0.04031 | MES7              |
| LOC_Os06g28480 | 3.8133  | 1.3633  | -1.4839 | 0.002522 | 0.04031 | DRT100            |
| LOC_Os04g52920 | 0.0900  | 0.0010  | -6.4919 | 0.002523 | 0.04031 | -                 |
| LOC_Os03g51459 | 2.1133  | 5.0900  | 1.2681  | 0.002541 | 0.04057 | -                 |
| LOC_Os09g20980 | 3.6400  | 0.9633  | -1.9178 | 0.002548 | 0.04064 | ATL46             |
| LOC_Os01g28970 | 0.3367  | 3.8167  | 3.5029  | 0.002557 | 0.04077 | -                 |
| LOC_Os04g03920 | 9.1067  | 1.3467  | -2.7575 | 0.002564 | 0.04086 | -                 |
| LOC_Os09g38772 | 5.7133  | 11.8700 | 1.0549  | 0.002576 | 0.04102 | 2-Mar             |
| LOC_Os12g02400 | 7.3300  | 1.8233  | -2.0072 | 0.002593 | 0.04125 | WRKY70            |
| LOC_Os08g35860 | 6.1567  | 14.9300 | 1.2780  | 0.002599 | 0.0413  | CKX11             |
| LOC_Os02g33380 | 0.7033  | 0.0900  | -2.9662 | 0.0026   | 0.0413  | -                 |
| LOC_Os04g50930 | 2.4967  | 5.2300  | 1.0668  | 0.002612 | 0.04146 | NPF8.3            |
| LOC_Os03g10210 | 1.0800  | 4.1033  | 1.9258  | 0.002626 | 0.04163 | HOX12             |
| LOC_Os01g29280 | 2.8767  | 0.7167  | -2.0050 | 0.002628 | 0.04164 | -                 |
| LOC_Os08g26850 | 13.1933 | 4.8267  | -1.4507 | 0.002636 | 0.04175 | -                 |
| LOC_Os07g45530 | 0.1867  | 0.0633  | -1.5594 | 0.002645 | 0.04186 | -                 |
| LOC_Os01g07620 | 0.4367  | 1.6467  | 1.9149  | 0.002647 | 0.04187 | -                 |
| LOC_Os07g01710 | 1.2067  | 2.5433  | 1.0757  | 0.002654 | 0.04196 | PSKR2             |
| LOC_Os06g47620 | 6.6600  | 1.5067  | -2.1442 | 0.002662 | 0.04206 | ILL6              |
| LOC_Os07g08160 | 0.0767  | 0.8600  | 3.4877  | 0.002666 | 0.04211 | -                 |
| LOC_Os05g15530 | 4.6333  | 14.2400 | 1.6198  | 0.002668 | 0.04211 | DAAT              |
| LOC_Os06g50480 | 0.7267  | 0.0500  | -3.8613 | 0.002671 | 0.04214 | TRAB1             |
| LOC_Os12g14520 | 2.0800  | 0.3733  | -2.4780 | 0.002674 | 0.04216 | -                 |
| LOC_Os01g37040 | 20.7067 | 8.9267  | -1.2139 | 0.002701 | 0.04256 | -                 |
| LOC_Os04g38910 | 0.8567  | 0.2867  | -1.5794 | 0.002705 | 0.04257 | RKL1              |
| LOC_Os05g27304 | 11.8900 | 4.9433  | -1.2662 | 0.002709 | 0.0426  | NPF2.3            |
| LOC_Os09g02270 | 2.0000  | 5.0833  | 1.3458  | 0.002715 | 0.04266 | kynB              |
| LOC_Os03g12730 | 1.1767  | 0.4267  | -1.4635 | 0.002722 | 0.04274 | BAM1              |
| LOC_Os03g60370 | 4.6533  | 10.5067 | 1.1750  | 0.002729 | 0.04282 | mipp1             |
| LOC_Os04g47840 | 0.7133  | 0.0433  | -4.0410 | 0.002731 | 0.04283 | -                 |
| LOC_Os12g13910 | 4.4300  | 9.6200  | 1.1187  | 0.002737 | 0.04288 | -                 |
| LOC_Os03g59320 | 20.6400 | 43.3033 | 1.0690  | 0.002739 | 0.04288 | -                 |
| LOC_Os03g11910 | 1.2200  | 2.7833  | 1.1899  | 0.002739 | 0.04288 | HSP70-8           |
| LOC_Os07g01530 | 0.8033  | 0.2500  | -1.6841 | 0.002753 | 0.04306 | At5g45440         |

|                    |          |          |         |          |         |            |
|--------------------|----------|----------|---------|----------|---------|------------|
| LOC_Os12g41730     | 0.0900   | 0.0033   | -4.7549 | 0.002755 | 0.04307 | -          |
| LOC_Os05g03130     | 0.2000   | 1.3700   | 2.7761  | 0.002761 | 0.04314 | LT101.2    |
| LOC_Os01g64860     | 4.4467   | 0.1200   | -5.2116 | 0.002764 | 0.04317 | SBT1.7     |
| LOC_Os02g42160     | 5.2067   | 1.8200   | -1.5164 | 0.002778 | 0.04334 | WAK5       |
| LOC_Os08g44360     | 0.5600   | 1.4200   | 1.3424  | 0.002783 | 0.04339 | FAR1       |
| LOC_Os08g14990     | 0.6667   | 0.3133   | -1.0893 | 0.002786 | 0.04341 | At3g47570  |
| LOC_Os06g03900     | 1.9067   | 0.6667   | -1.5160 | 0.002789 | 0.04342 | At1g28600  |
| LOC_Os01g48610     | 4.5967   | 1.7533   | -1.3905 | 0.002793 | 0.04345 | -          |
| LOC_Os05g39200     | 0.0010   | 0.1767   | 7.4649  | 0.002803 | 0.04359 | -          |
| LOC_Os11g40570     | 2.5333   | 7.6167   | 1.5881  | 0.00282  | 0.04381 | tmem45b    |
| LOC_Os08g07490     | 8.0167   | 3.0733   | -1.3832 | 0.002838 | 0.044   | -          |
| MSTRG.8403         | 1.1400   | 2.6800   | 1.2332  | 0.002841 | 0.04403 | --         |
| LOC_Os03g05610     | 0.5033   | 0.0933   | -2.4310 | 0.002846 | 0.04408 | PHT1-12    |
| LOC_Os01g46950     | 0.6367   | 0.2467   | -1.3680 | 0.002876 | 0.04452 | YMR099C    |
| LOC_Os01g37590     | 49.9600  | 12.3400  | -2.0174 | 0.002923 | 0.04516 | NPF6.2     |
| ChrSy.fgenes.h.gen | 1.8600   | 0.5433   | -1.7754 | 0.002925 | 0.04516 | WAK3       |
| LOC_Os01g42860     | 9.3867   | 41.3167  | 2.1380  | 0.002936 | 0.04531 | -          |
| LOC_Os03g58490     | 0.3533   | 0.0967   | -1.8699 | 0.002945 | 0.04539 | MYOB2      |
| LOC_Os01g04350     | 279.5533 | 127.9033 | -1.1281 | 0.002945 | 0.04539 | HSP17.9B   |
| LOC_Os09g32020     | 3.8500   | 8.1667   | 1.0849  | 0.002956 | 0.04554 | TKPR1      |
| LOC_Os01g53990     | 0.2533   | 0.0010   | -7.9849 | 0.002967 | 0.04568 | PME53      |
| LOC_Os02g46473     | 30.8300  | 64.6767  | 1.0689  | 0.002973 | 0.04574 | -          |
| LOC_Os05g04460     | 0.0933   | 0.0010   | -6.5443 | 0.002974 | 0.04574 | WAK5       |
| LOC_Os04g47810     | 2.0333   | 0.7933   | -1.3578 | 0.002991 | 0.04598 | BHLH111    |
| LOC_Os04g56390     | 0.7333   | 0.0600   | -3.6114 | 0.003027 | 0.04645 | -          |
| LOC_Os01g50010     | 13.7800  | 6.7467   | -1.0303 | 0.003034 | 0.04653 | At4g32285  |
| LOC_Os12g08850     | 0.5700   | 0.0533   | -3.4179 | 0.003035 | 0.04653 | csd        |
| LOC_Os05g02564     | 0.8033   | 0.3500   | -1.1986 | 0.003037 | 0.04654 | -          |
| LOC_Os10g30880     | 13.6467  | 5.9367   | -1.2008 | 0.003059 | 0.04683 | -          |
| LOC_Os01g09700     | 5.4133   | 1.1833   | -2.1937 | 0.00306  | 0.04683 | ACS7       |
| LOC_Os01g12190     | 6.7300   | 3.0867   | -1.1246 | 0.003062 | 0.04685 | -          |
| LOC_Os11g02470     | 1.6333   | 0.3333   | -2.2928 | 0.003068 | 0.04691 | WRKY54     |
| LOC_Os03g53220     | 0.0067   | 0.1500   | 4.4919  | 0.003072 | 0.04695 | Snrnp200   |
| LOC_Os07g03820     | 0.3533   | 0.9833   | 1.4767  | 0.003082 | 0.04702 | LECRK42    |
| LOC_Os04g43670     | 1.4433   | 0.3233   | -2.1583 | 0.003108 | 0.04739 | -          |
| LOC_Os10g37500     | 8.0200   | 3.5767   | -1.1650 | 0.003129 | 0.04769 | SPAC644.07 |
| LOC_Os06g12560     | 4.0333   | 1.8100   | -1.1560 | 0.003151 | 0.04792 | ATL24      |
| LOC_Os10g37290     | 7.6767   | 3.6067   | -1.0898 | 0.003151 | 0.04792 | -          |
| LOC_Os11g40410     | 0.5633   | 0.0733   | -2.9414 | 0.003155 | 0.04796 | -          |
| LOC_Os01g52260     | 16.9967  | 34.1567  | 1.0069  | 0.00316  | 0.048   | SAT1       |
| LOC_Os04g10924     | 2.0833   | 0.7567   | -1.4612 | 0.003175 | 0.04817 | -          |
| LOC_Os04g30330     | 0.5333   | 0.0433   | -3.6215 | 0.003192 | 0.04839 | WAKL2      |
| LOC_Os07g18158     | 1.7033   | 0.6967   | -1.2898 | 0.003213 | 0.04863 | AO1        |

|                |          |           |         |          |         |           |
|----------------|----------|-----------|---------|----------|---------|-----------|
| LOC_Os08g34460 | 0.3700   | 0.0433    | -3.0940 | 0.003236 | 0.04889 | TET8      |
| LOC_Os02g16050 | 0.0500   | 0.2067    | 2.0473  | 0.00326  | 0.04919 | At1g48120 |
| LOC_Os06g09900 | 540.3767 | 1116.0700 | 1.0464  | 0.00326  | 0.04919 | -         |
| LOC_Os03g28990 | 1.1367   | 0.1333    | -3.0917 | 0.003294 | 0.04961 | sll10103  |
| LOC_Os07g13834 | 6.4000   | 13.8400   | 1.1127  | 0.003302 | 0.04971 | -         |
| LOC_Os12g02640 | 6.2733   | 2.8367    | -1.1450 | 0.003312 | 0.04983 | CYP714C2  |
| LOC_Os07g47700 | 99.3667  | 43.8733   | -1.1794 | 0.003323 | 0.04994 | UXS2      |
| LOC_Os01g68470 | 0.3833   | 0.0400    | -3.2605 | 0.003327 | 0.04997 | -         |

---

**Table S4.** Statistical data of total differentially expressed genes (DEGs) for SN\_CK vs. SN\_A.

| id             | SN_CK<br>_mean | SN_A<br>_mean | log2(fc) | PValue   | FDR       | Symbol       |
|----------------|----------------|---------------|----------|----------|-----------|--------------|
| LOC_Os07g03730 | 471.4467       | 19.2633       | -4.6132  | 1.13E-15 | 3.14E-11  | -            |
| LOC_Os01g68740 | 84.6033        | 8.1967        | -3.3676  | 3.94E-15 | 5.46E-11  | -            |
| LOC_Os08g37300 | 2.9333         | 15.2633       | 2.3795   | 8.95E-13 | 8.27E-09  | -            |
| LOC_Os02g02930 | 8.4000         | 0.1267        | -6.0513  | 1.37E-12 | 9.53E-09  | -            |
| LOC_Os04g29770 | 15.8367        | 1.7500        | -3.1778  | 4.51E-11 | 2.24E-07  | WAK3         |
| LOC_Os01g09150 | 3.9767         | 0.1033        | -5.2662  | 4.86E-11 | 2.24E-07  | -            |
| LOC_Os04g39320 | 73.8233        | 9.8067        | -2.9122  | 1.21E-10 | 4.79E-07  | -            |
| LOC_Os07g03740 | 53.2900        | 4.2000        | -3.6654  | 2.23E-10 | 7.73E-07  | -            |
| LOC_Os06g21240 | 3.0700         | 15.3067       | 2.3178   | 4.74E-10 | 1.46E-06  | -            |
| LOC_Os04g48200 | 0.0400         | 1.7267        | 5.4318   | 5.56E-10 | 1.54E-06  | CYP87A3      |
| LOC_Os04g39300 | 39.2800        | 2.3167        | -4.0837  | 8.80E-10 | 2.21E-06  | -            |
| LOC_Os06g20790 | 4.4933         | 0.2133        | -4.3966  | 9.57E-10 | 2.21E-06  | AAMT11       |
| LOC_Os08g29980 | 0.3200         | 1.5400        | 2.2668   | 1.05E-09 | 2.24E-06  | -            |
| LOC_Os04g30330 | 1.5500         | 0.0633        | -4.6132  | 1.16E-09 | 2.29E-06  | WAKL2        |
| LOC_Os10g02380 | 15.7500        | 34.7667       | 1.1424   | 2.73E-09 | 4.76E-06  | Os10g0113000 |
| LOC_Os02g21925 | 73.9100        | 0.2700        | -8.0967  | 2.74E-09 | 4.76E-06  | -            |
| LOC_Os11g46900 | 5.7300         | 0.0867        | -6.0469  | 3.27E-09 | 5.34E-06  | WAK5         |
| LOC_Os04g27020 | 13.2767        | 0.2800        | -5.5673  | 3.86E-09 | 5.56E-06  | CYP71Z7      |
| LOC_Os01g68730 | 4.5433         | 0.4467        | -3.3465  | 4.01E-09 | 5.56E-06  | -            |
| LOC_Os07g29960 | 3.9500         | 0.1067        | -5.2107  | 4.01E-09 | 5.56E-06  | CYP87A3      |
| LOC_Os07g35940 | 1.4833         | 11.2400       | 2.9217   | 5.02E-09 | 6.63E-06  | BMY1         |
| LOC_Os12g24320 | 58.7500        | 5.5467        | -3.4049  | 6.26E-09 | 7.89E-06  | bcs1b        |
| LOC_Os11g37970 | 10.5100        | 72.5933       | 2.7881   | 8.28E-09 | 9.54E-06  | PR4A         |
| LOC_Os04g56910 | 2.0233         | 0.0010        | -10.9825 | 8.30E-09 | 9.54E-06  | ACT-2        |
| LOC_Os07g12890 | 37.8333        | 6.2433        | -2.5993  | 8.60E-09 | 9.54E-06  | ZIP8         |
| MSTRG.26475    | 68.4433        | 2.4500        | -4.8041  | 9.82E-09 | 1.05E-05  | --           |
| LOC_Os12g31540 | 3.5533         | 0.0667        | -5.7361  | 1.09E-08 | 1.12E-05  | CNR13        |
| LOC_Os01g44960 | 1.4033         | 5.9100        | 2.0743   | 1.91E-08 | 1.89E-05  | ephx3        |
| LOC_Os06g21210 | 13.9033        | 48.5367       | 1.8036   | 2.07E-08 | 1.98E-05  | -            |
| LOC_Os09g39410 | 0.5233         | 1.7900        | 1.7742   | 2.60E-08 | 2.41E-05  | FAR4         |
| LOC_Os10g39130 | 105.8767       | 22.5467       | -2.2314  | 3.90E-08 | 3.49E-05  | MADS56       |
| LOC_Os07g37385 | 2.3133         | 0.0010        | -11.1758 | 8.31E-08 | 7.20E-05  | fhaB         |
| LOC_Os07g11970 | 3.9067         | 0.1300        | -4.9094  | 9.94E-08 | 8.35E-05  | CYP71Z7      |
| LOC_Os11g24070 | 14.4933        | 70.4667       | 2.2816   | 1.18E-07 | 9.59E-05  | LTP          |
| LOC_Os10g34940 | 11.1233        | 0.2900        | -5.2614  | 1.42E-07 | 0.00011   | -            |
| LOC_Os08g15710 | 6.3900         | 0.4800        | -3.7347  | 1.43E-07 | 0.00011   | -            |
| LOC_Os11g31090 | 1.2733         | 4.4967        | 1.8202   | 2.16E-07 | 0.0001621 | HHT1         |
| LOC_Os05g46370 | 0.4700         | 2.5333        | 2.4303   | 2.27E-07 | 0.0001639 | BHLH87       |

|                |          |         |          |          |           |              |
|----------------|----------|---------|----------|----------|-----------|--------------|
| LOC_Os07g48260 | 9.9700   | 1.7033  | -2.5492  | 2.31E-07 | 0.0001639 | WRKY54       |
| LOC_Os02g17590 | 9.4667   | 0.2767  | -5.0966  | 2.81E-07 | 0.0001944 | -            |
| LOC_Os01g02780 | 15.5200  | 3.3467  | -2.2133  | 2.87E-07 | 0.0001944 | At1g67000    |
| LOC_Os09g13440 | 130.0233 | 11.6367 | -3.4820  | 3.46E-07 | 0.0002285 | -            |
| LOC_Os01g63180 | 4.4033   | 0.1500  | -4.8756  | 3.61E-07 | 0.0002331 | LAC6         |
| LOC_Os09g31430 | 2.9933   | 14.2333 | 2.2494   | 3.92E-07 | 0.0002451 | BGLU30       |
| LOC_Os05g08420 | 18.1067  | 1.8900  | -3.2601  | 3.98E-07 | 0.0002451 | -            |
| LOC_Os07g14820 | 1.1467   | 0.0010  | -10.1632 | 4.33E-07 | 0.0002595 | At3g47570    |
| LOC_Os04g54240 | 3.0733   | 11.5600 | 1.9113   | 4.40E-07 | 0.0002595 | -            |
| LOC_Os11g44630 | 11.0967  | 0.5167  | -4.4247  | 6.12E-07 | 0.0003538 | -            |
| LOC_Os05g47870 | 7.3800   | 16.2533 | 1.1390   | 6.80E-07 | 0.0003778 | -            |
| LOC_Os07g01340 | 0.3067   | 3.4833  | 3.5057   | 6.83E-07 | 0.0003778 | GA2OX8       |
| LOC_Os07g09050 | 0.2667   | 2.3233  | 3.1231   | 6.95E-07 | 0.0003778 | At5g03795    |
| LOC_Os04g22120 | 15.7333  | 0.9233  | -4.0908  | 7.46E-07 | 0.0003978 | LECRK91      |
| LOC_Os04g07110 | 7.9700   | 0.3600  | -4.4685  | 7.84E-07 | 0.00041   | -            |
| LOC_Os06g38120 | 32.6433  | 2.0533  | -3.9907  | 8.11E-07 | 0.0004166 | -            |
| LOC_Os01g68460 | 5.0900   | 0.0767  | -6.0529  | 9.73E-07 | 0.0004907 | -            |
| LOC_Os06g29730 | 90.2867  | 16.4567 | -2.4558  | 1.01E-06 | 0.0005005 | -            |
| LOC_Os07g31070 | 5.3900   | 0.3367  | -4.0009  | 1.08E-06 | 0.0005253 | At2g01680    |
| LOC_Os06g04010 | 4.2500   | 11.5967 | 1.4482   | 1.17E-06 | 0.0005597 | Os06g0130600 |
| LOC_Os11g47630 | 7.7100   | 0.5633  | -3.7747  | 1.25E-06 | 0.0005867 | ZAT8         |
| LOC_Os08g08690 | 10.8067  | 1.3500  | -3.0009  | 1.27E-06 | 0.0005867 | -            |
| LOC_Os07g48050 | 10.2867  | 0.5433  | -4.2428  | 1.32E-06 | 0.0006004 | -            |
| LOC_Os06g34960 | 2.5800   | 0.3333  | -2.9523  | 1.34E-06 | 0.0006004 | At1g67520    |
| LOC_Os11g05800 | 14.3733  | 1.3667  | -3.3947  | 1.39E-06 | 0.0006129 | HVA22J       |
| LOC_Os10g37400 | 3.4933   | 11.5600 | 1.7265   | 1.53E-06 | 0.0006627 | -            |
| MSTRG.7258     | 10.7000  | 0.6733  | -3.9901  | 1.59E-06 | 0.0006728 | --           |
| LOC_Os05g34170 | 3.6433   | 12.4100 | 1.7682   | 1.60E-06 | 0.0006728 | TUBB6        |
| LOC_Os12g36830 | 137.7633 | 7.6633  | -4.1681  | 1.81E-06 | 0.0007485 | -            |
| LOC_Os02g50460 | 9.4800   | 0.3533  | -4.7458  | 1.85E-06 | 0.0007534 | PUB20        |
| LOC_Os06g43384 | 1.4233   | 0.0967  | -3.8801  | 1.90E-06 | 0.0007619 | CYP71D7      |
| LOC_Os01g28450 | 778.0033 | 28.0167 | -4.7954  | 1.99E-06 | 0.0007864 | -            |
| LOC_Os11g19240 | 0.0010   | 0.3967  | 8.6318   | 2.12E-06 | 0.0008283 | AVT1         |
| LOC_Os01g10320 | 2.0667   | 6.7333  | 1.7040   | 2.16E-06 | 0.0008308 | HOX29        |
| LOC_Os06g34020 | 0.4467   | 2.0300  | 2.1842   | 2.43E-06 | 0.0009199 | At1g32860    |
| MSTRG.22412    | 131.1800 | 6.0433  | -4.4401  | 2.45E-06 | 0.0009199 | --           |
| LOC_Os11g41034 | 2.1300   | 0.1367  | -3.9621  | 2.51E-06 | 0.0009284 | -            |
| LOC_Os09g25070 | 37.3600  | 5.1600  | -2.8561  | 2.79E-06 | 0.0010169 | WRKY40       |
| LOC_Os04g29790 | 3.0733   | 0.3333  | -3.2048  | 2.89E-06 | 0.0010402 | -            |
| MSTRG.21425    | 5.9933   | 0.3900  | -3.9418  | 2.95E-06 | 0.0010478 | --           |
| LOC_Os03g14642 | 5.4500   | 46.4333 | 3.0908   | 3.19E-06 | 0.0011189 | -            |
| LOC_Os07g34850 | 9.3867   | 0.7733  | -3.6015  | 3.42E-06 | 0.0011855 | nep1         |
| LOC_Os04g50940 | 18.0467  | 0.6167  | -4.8711  | 3.52E-06 | 0.0011882 | NPF8.3       |

|                |          |         |          |          |           |           |
|----------------|----------|---------|----------|----------|-----------|-----------|
| LOC_Os09g39650 | 32.5233  | 4.4200  | -2.8794  | 3.55E-06 | 0.0011882 | PUB33     |
| LOC_Os02g18070 | 5.9833   | 0.5800  | -3.3668  | 3.61E-06 | 0.0011882 | RGA2      |
| LOC_Os03g21710 | 15.8867  | 1.9067  | -3.0587  | 3.67E-06 | 0.0011882 | WRKY70    |
| MSTRG.9448     | 1.7233   | 0.0010  | -10.7510 | 3.68E-06 | 0.0011882 | --        |
| LOC_Os09g26144 | 3.6933   | 0.4133  | -3.1595  | 3.68E-06 | 0.0011882 | GLR2.8    |
| LOC_Os08g20200 | 0.2533   | 1.0767  | 2.0875   | 3.78E-06 | 0.0012036 | FAR1      |
| LOC_Os08g13870 | 1.5333   | 0.1233  | -3.6360  | 3.84E-06 | 0.0012036 | RLK1      |
| LOC_Os05g14820 | 1.4267   | 0.0100  | -7.1565  | 3.86E-06 | 0.0012036 | LHT1      |
| MSTRG.17789    | 0.3667   | 4.2333  | 3.5293   | 3.93E-06 | 0.0012114 | --        |
| LOC_Os09g29560 | 1.4100   | 0.1500  | -3.2327  | 4.03E-06 | 0.0012282 | WAK3      |
| LOC_Os02g36030 | 1.7467   | 0.0800  | -4.4485  | 4.20E-06 | 0.0012575 | CYP76M5   |
| LOC_Os07g03040 | 9.1733   | 0.8733  | -3.3928  | 4.22E-06 | 0.0012575 | -         |
| LOC_Os02g58100 | 0.5133   | 11.6600 | 4.5055   | 5.27E-06 | 0.0015556 | -         |
| LOC_Os11g46810 | 0.9633   | 0.0667  | -3.8530  | 5.35E-06 | 0.0015608 | WAK1      |
| LOC_Os09g18050 | 3.0800   | 0.3300  | -3.2224  | 5.71E-06 | 0.0016503 | -         |
| LOC_Os01g13610 | 6.3167   | 0.1467  | -5.4286  | 5.92E-06 | 0.0016917 | IRL       |
| LOC_Os12g01490 | 10.2933  | 1.3600  | -2.9200  | 5.98E-06 | 0.0016924 | KAN4      |
| LOC_Os01g41820 | 12.8433  | 3.2167  | -1.9974  | 6.31E-06 | 0.0017678 | CYP72A15  |
| LOC_Os01g09190 | 4.4933   | 0.2367  | -4.2469  | 7.05E-06 | 0.0019446 | -         |
| LOC_Os01g09990 | 4.3167   | 0.2400  | -4.1688  | 7.08E-06 | 0.0019446 | BHLH      |
| LOC_Os11g44700 | 2.6500   | 0.2033  | -3.7041  | 7.18E-06 | 0.0019512 | -         |
| LOC_Os11g12320 | 4.9833   | 0.9433  | -2.4013  | 7.94E-06 | 0.0021388 | RPM1      |
| LOC_Os05g04930 | 8.1000   | 0.2600  | -4.9613  | 8.21E-06 | 0.0021902 | HSR201    |
| LOC_Os02g42450 | 5.6900   | 20.4067 | 1.8425   | 8.42E-06 | 0.0022239 | grip22    |
| LOC_Os04g49194 | 36.1600  | 3.8500  | -3.2315  | 8.69E-06 | 0.002273  | -         |
| LOC_Os10g30560 | 10.4300  | 1.6000  | -2.7046  | 1.03E-05 | 0.0026735 | UGT86A1   |
| LOC_Os05g30760 | 10.1500  | 0.2000  | -5.6653  | 1.06E-05 | 0.0027275 | PIR7B     |
| LOC_Os10g04450 | 2.5633   | 10.8000 | 2.0749   | 1.08E-05 | 0.0027471 | -         |
| LOC_Os03g46180 | 0.1667   | 0.8767  | 2.3951   | 1.21E-05 | 0.0030409 | -         |
| LOC_Os07g33780 | 109.2567 | 12.1333 | -3.1707  | 1.38E-05 | 0.0034543 | ABCG43    |
| LOC_Os12g38180 | 65.1200  | 20.2600 | -1.6845  | 1.48E-05 | 0.0036686 | HSC-2     |
| LOC_Os02g18080 | 5.2733   | 0.7667  | -2.7820  | 1.76E-05 | 0.0043144 | RGA2      |
| LOC_Os11g28540 | 3.2300   | 0.2500  | -3.6915  | 1.82E-05 | 0.0044049 | -         |
| LOC_Os04g54020 | 0.3900   | 1.2333  | 1.6610   | 1.83E-05 | 0.0044049 | SD18      |
| LOC_Os03g24820 | 4.1567   | 0.1867  | -4.4769  | 1.84E-05 | 0.0044049 | -         |
| LOC_Os02g13430 | 5.9900   | 0.9667  | -2.6315  | 1.88E-05 | 0.0044467 | HSL1      |
| LOC_Os02g39660 | 9.7733   | 1.3300  | -2.8774  | 1.90E-05 | 0.0044762 | EFR       |
| LOC_Os01g14630 | 8.6833   | 0.8333  | -3.3813  | 1.93E-05 | 0.0045091 | GGPPS1    |
| LOC_Os06g38870 | 8.7833   | 1.0733  | -3.0327  | 1.98E-05 | 0.00454   | -         |
| LOC_Os06g16350 | 1.4700   | 6.0167  | 2.0331   | 1.98E-05 | 0.00454   | PER11     |
| LOC_Os10g39710 | 22.4300  | 3.3500  | -2.7432  | 2.02E-05 | 0.0045812 | SSL5      |
| LOC_Os09g18360 | 3.5000   | 0.4600  | -2.9276  | 2.13E-05 | 0.004806  | At1g51860 |
| LOC_Os02g32650 | 0.0010   | 0.4933  | 8.9464   | 2.15E-05 | 0.0048141 | -         |



|                |           |           |         |          |           |              |
|----------------|-----------|-----------|---------|----------|-----------|--------------|
| LOC_Os02g36280 | 3.1833    | 0.0933    | -5.0920 | 2.18E-05 | 0.0048322 | CYP76M6      |
| LOC_Os11g18194 | 2.0167    | 6.1633    | 1.6117  | 2.29E-05 | 0.0050337 | Os11g0285000 |
| LOC_Os06g41100 | 2.1400    | 0.5867    | -1.8670 | 2.36E-05 | 0.0051574 | -            |
| LOC_Os04g37970 | 0.9933    | 0.0900    | -3.4643 | 2.41E-05 | 0.005193  | STP5         |
| MSTRG.3477     | 7.7300    | 2.4333    | -1.6675 | 2.42E-05 | 0.005193  | HEXO3        |
| LOC_Os06g38764 | 173.6867  | 12.0100   | -3.8542 | 2.46E-05 | 0.0052375 | -            |
| LOC_Os09g22000 | 2.8900    | 10.4133   | 1.8493  | 2.51E-05 | 0.0053174 | yidA         |
| LOC_Os06g38830 | 6.0800    | 0.7667    | -2.9874 | 2.57E-05 | 0.0053929 | At3g47570    |
| LOC_Os11g31540 | 26.6433   | 2.1433    | -3.6358 | 2.60E-05 | 0.0054301 | SERK1        |
| LOC_Os07g25810 | 0.9467    | 4.6167    | 2.2859  | 2.71E-05 | 0.0056157 | Sbsn         |
| LOC_Os11g33394 | 2.8300    | 0.5133    | -2.4628 | 2.82E-05 | 0.0057878 | At3g47200    |
| LOC_Os04g30250 | 32.5500   | 5.2333    | -2.6369 | 3.23E-05 | 0.0065813 | WAK2         |
| LOC_Os02g36110 | 8.3467    | 0.3700    | -4.4956 | 3.25E-05 | 0.0065813 | CYP76M7      |
| LOC_Os12g36850 | 135.6733  | 9.2200    | -3.8792 | 3.44E-05 | 0.0069144 | BETV1D       |
| LOC_Os03g18060 | 0.0010    | 0.1100    | 6.7814  | 3.51E-05 | 0.0070033 | At1g48120    |
| LOC_Os06g32990 | 13.8400   | 0.2000    | -6.1127 | 3.61E-05 | 0.0071284 | PER36        |
| LOC_Os06g06750 | 0.4300    | 0.0010    | -8.7482 | 3.62E-05 | 0.0071284 | MADS5        |
| LOC_Os04g41680 | 11.3200   | 70.6367   | 2.6415  | 3.87E-05 | 0.0074975 | Cht5         |
| LOC_Os02g53970 | 0.1700    | 0.0010    | -7.4094 | 3.89E-05 | 0.0074975 | SBT1.7       |
| LOC_Os12g36860 | 6.9867    | 0.2367    | -4.8837 | 3.89E-05 | 0.0074975 | BETV1G       |
| LOC_Os12g36880 | 279.1700  | 30.7333   | -3.1833 | 4.03E-05 | 0.0077084 | MALD1        |
| LOC_Os11g07270 | 0.7033    | 2.4467    | 1.7985  | 4.14E-05 | 0.0078627 | At3g47570    |
| LOC_Os07g33700 | 0.5733    | 0.0400    | -3.8413 | 4.48E-05 | 0.0084503 | At1g48120    |
| LOC_Os04g41620 | 43.7500   | 307.7567  | 2.8144  | 4.64E-05 | 0.0087036 | Cht4         |
| LOC_Os01g68720 | 13.0100   | 2.1900    | -2.5706 | 4.71E-05 | 0.008762  | -            |
| LOC_Os06g38340 | 9.4233    | 1.9200    | -2.2951 | 4.83E-05 | 0.0089273 | At3g47570    |
| LOC_Os04g50700 | 1.9900    | 10.1800   | 2.3549  | 5.15E-05 | 0.0094517 | -            |
| LOC_Os11g33970 | 13.1900   | 3.3500    | -1.9772 | 5.45E-05 | 0.0099409 | At3g47200    |
| LOC_Os02g17600 | 0.9333    | 0.0167    | -5.8074 | 5.65E-05 | 0.0102232 | FT1          |
| LOC_Os08g39840 | 128.2300  | 6.1367    | -4.3851 | 5.68E-05 | 0.0102232 | CM-LOX1      |
| LOC_Os04g30060 | 8.4067    | 0.7733    | -3.4424 | 5.74E-05 | 0.0102704 | WAKL10       |
| LOC_Os12g43450 | 12.6267   | 132.0033  | 3.3860  | 5.92E-05 | 0.0105273 | tlp          |
| LOC_Os08g26230 | 211.2167  | 15.7633   | -3.7441 | 5.97E-05 | 0.0105392 | -            |
| LOC_Os07g10910 | 1.8467    | 4.2467    | 1.2014  | 6.07E-05 | 0.0106545 | EXO70A1      |
| LOC_Os04g07260 | 2.8033    | 0.1833    | -3.9346 | 6.39E-05 | 0.0111394 | -            |
| LOC_Os12g02320 | 3642.2367 | 7574.1300 | 1.0563  | 6.47E-05 | 0.0112138 | LTP          |
| LOC_Os02g50470 | 46.0333   | 4.7367    | -3.2807 | 6.58E-05 | 0.011327  | -            |
| LOC_Os02g46810 | 8.5733    | 2.5733    | -1.7362 | 6.64E-05 | 0.0113671 | AAP4         |
| LOC_Os01g42110 | 3.4533    | 10.3400   | 1.5822  | 6.86E-05 | 0.0116409 | SWEET6A      |
| LOC_Os01g43750 | 16.5600   | 1.5167    | -3.4487 | 6.88E-05 | 0.0116409 | CYP72A15     |
| LOC_Os01g02930 | 0.9767    | 2.5767    | 1.3996  | 6.94E-05 | 0.0116546 | pomgnt2      |
| LOC_Os02g36190 | 7.3933    | 0.6867    | -3.4285 | 6.98E-05 | 0.0116546 | CYP71Z7      |
| LOC_Os10g33550 | 1.7233    | 34.9533   | 4.3422  | 7.23E-05 | 0.012006  | FAO1         |

|                |         |          |         |          |           |              |
|----------------|---------|----------|---------|----------|-----------|--------------|
| LOC_Os07g31190 | 1.9167  | 0.1100   | -4.1230 | 7.44E-05 | 0.012283  | WAK2         |
| LOC_Os05g29810 | 0.1767  | 1.1067   | 2.6471  | 7.62E-05 | 0.0124751 | RAP2-3       |
| LOC_Os05g37600 | 0.4733  | 2.0867   | 2.1403  | 7.65E-05 | 0.0124751 | GPAT6        |
| LOC_Os11g31530 | 58.9267 | 2.2733   | -4.6960 | 7.73E-05 | 0.0124935 | SERK1        |
| LOC_Os04g30240 | 26.7000 | 4.7600   | -2.4878 | 7.78E-05 | 0.0124935 | WAK2         |
| LOC_Os09g09510 | 3.1033  | 0.4900   | -2.6630 | 7.79E-05 | 0.0124935 | LECRK41      |
| LOC_Os01g61160 | 0.8167  | 2.5100   | 1.6199  | 7.87E-05 | 0.0125456 | LAC3         |
| LOC_Os04g59540 | 0.5567  | 3.8767   | 2.7999  | 8.01E-05 | 0.0126979 | FAB1B        |
| LOC_Os04g54300 | 7.3233  | 24.0833  | 1.7175  | 8.14E-05 | 0.0128253 | -            |
| LOC_Os08g39850 | 74.3033 | 5.4567   | -3.7673 | 8.23E-05 | 0.0128938 | CM-LOX2      |
| LOC_Os04g52190 | 44.0767 | 4.6400   | -3.2478 | 8.37E-05 | 0.0130405 | VSR7         |
| LOC_Os06g37560 | 14.3200 | 89.4867  | 2.6436  | 8.44E-05 | 0.0130742 | Os06g0573600 |
| LOC_Os11g12340 | 39.3133 | 3.8033   | -3.3697 | 8.64E-05 | 0.013304  | RPM1         |
| LOC_Os09g08130 | 85.6433 | 5.1700   | -4.0501 | 8.89E-05 | 0.0136029 | At2g04400    |
| LOC_Os01g11720 | 5.0767  | 1.3367   | -1.9252 | 8.93E-05 | 0.0136029 | -            |
| LOC_Os02g28340 | 4.9133  | 13.0700  | 1.4115  | 8.98E-05 | 0.0136029 | 3AT1         |
| LOC_Os08g42570 | 1.4467  | 0.0500   | -4.8547 | 9.26E-05 | 0.0138907 | At3g47200    |
| LOC_Os04g46130 | 0.1167  | 3.0467   | 4.7068  | 9.27E-05 | 0.0138907 | -            |
| LOC_Os03g58320 | 25.1067 | 1.0400   | -4.5934 | 9.35E-05 | 0.0139334 | BX1          |
| LOC_Os09g27750 | 28.4767 | 74.7133  | 1.3916  | 9.79E-05 | 0.0145215 | ACO1         |
| LOC_Os01g71670 | 14.8900 | 67.8033  | 2.1870  | 0.0001   | 0.0147937 | -            |
| LOC_Os10g05250 | 6.9167  | 1.1800   | -2.5513 | 0.0001   | 0.0149413 | WAKL4        |
| LOC_Os02g36140 | 21.0633 | 1.6700   | -3.6568 | 0.0001   | 0.0149413 | KSL7         |
| LOC_Os09g26670 | 0.2267  | 4.5867   | 4.3388  | 0.00011  | 0.0151886 | -            |
| LOC_Os03g57970 | 3.6567  | 11.7100  | 1.6791  | 0.00011  | 0.0161455 | LTPG2        |
| LOC_Os03g06890 | 1.5300  | 0.2067   | -2.8882 | 0.00012  | 0.0167085 | MYOB1        |
| LOC_Os01g58194 | 8.1700  | 17.7967  | 1.1232  | 0.00012  | 0.0167085 | Os01g0794400 |
| LOC_Os11g07690 | 2.2567  | 0.0400   | -5.8180 | 0.00012  | 0.0170014 | DIR19        |
| LOC_Os09g27930 | 1.1300  | 0.1200   | -3.2352 | 0.00012  | 0.0170014 | Ub-CEP52-2   |
| LOC_Os04g25060 | 31.9067 | 3.3933   | -3.2331 | 0.00012  | 0.0170014 | CRRSP38      |
| LOC_Os03g09910 | 11.2567 | 1.5800   | -2.8328 | 0.00012  | 0.0171597 | ALD1         |
| LOC_Os10g13850 | 7.1400  | 107.8833 | 3.9174  | 0.00012  | 0.0172303 | -            |
| LOC_Os09g29690 | 1.4433  | 9.4000   | 2.7033  | 0.00013  | 0.0174415 | CjBAp12      |
| LOC_Os11g12260 | 4.0833  | 0.3633   | -3.4904 | 0.00013  | 0.0174445 | RPM1         |
| LOC_Os03g25850 | 0.5933  | 6.6133   | 3.4785  | 0.00013  | 0.0175621 | -            |
| LOC_Os05g46790 | 14.1667 | 0.4000   | -5.1464 | 0.00013  | 0.0180067 | -            |
| LOC_Os01g19260 | 3.4767  | 0.4367   | -2.9931 | 0.00014  | 0.0187412 | bcs11b       |
| LOC_Os03g47016 | 2.7100  | 0.4100   | -2.7246 | 0.00014  | 0.0188792 | OSH10        |
| LOC_Os02g37160 | 19.9433 | 6.2533   | -1.6732 | 0.00014  | 0.0188792 | -            |
| LOC_Os02g53100 | 1.3100  | 0.0633   | -4.3705 | 0.00015  | 0.0197583 | WRKY9        |
| LOC_Os04g03830 | 5.6733  | 0.6600   | -3.1037 | 0.00015  | 0.0197802 | WAK5         |
| LOC_Os12g32850 | 2.3933  | 0.1667   | -3.8440 | 0.00015  | 0.0201953 | CYP71E1      |
| LOC_Os11g28530 | 2.0533  | 0.2167   | -3.2444 | 0.00016  | 0.020662  | KSL8         |

|                |          |           |         |         |           |              |
|----------------|----------|-----------|---------|---------|-----------|--------------|
| LOC_Os08g15149 | 32.9633  | 5.5400    | -2.5729 | 0.00016 | 0.020662  | -            |
| LOC_Os08g14760 | 0.8833   | 2.5967    | 1.5556  | 0.00016 | 0.020662  | 4CL1         |
| LOC_Os12g26510 | 0.2700   | 1.1267    | 2.0610  | 0.00016 | 0.0207257 | -            |
| LOC_Os02g49920 | 14.2233  | 70.3600   | 2.3065  | 0.00017 | 0.02147   | KCS5         |
| LOC_Os11g42200 | 23.4100  | 1.5033    | -3.9609 | 0.00017 | 0.0217745 | LAC19        |
| LOC_Os05g01370 | 2.7500   | 0.1833    | -3.9069 | 0.00017 | 0.0218241 | PGIP         |
| LOC_Os07g34260 | 66.9467  | 5.5467    | -3.5933 | 0.00017 | 0.0218825 | Os07g0271500 |
| LOC_Os11g01480 | 10.1200  | 1.9467    | -2.3781 | 0.00018 | 0.0229868 | KAN4         |
| LOC_Os12g11510 | 0.1833   | 0.0010    | -7.5183 | 0.00018 | 0.0231217 | RLP12        |
| LOC_Os01g05780 | 0.0010   | 0.6533    | 9.3517  | 0.00018 | 0.0231217 | PAS2A        |
| LOC_Os04g46210 | 1.4233   | 0.2267    | -2.6506 | 0.00019 | 0.0231217 | -            |
| LOC_Os12g08930 | 7.8767   | 0.8133    | -3.2757 | 0.00019 | 0.0232069 | -            |
| LOC_Os01g52070 | 0.0633   | 0.4433    | 2.8074  | 0.00019 | 0.023813  | Os01g0718700 |
| LOC_Os01g02790 | 3.5600   | 0.9100    | -1.9679 | 0.0002  | 0.0246212 | At5g39030    |
| LOC_Os06g35700 | 9.5500   | 0.4133    | -4.5301 | 0.00021 | 0.0252355 | -            |
| LOC_Os12g26690 | 0.1500   | 0.9000    | 2.5850  | 0.00021 | 0.025241  | -            |
| LOC_Os02g13260 | 0.5167   | 0.0167    | -4.9542 | 0.00021 | 0.0254513 | At4g22030    |
| LOC_Os12g37650 | 88.7533  | 702.3700  | 2.9844  | 0.00021 | 0.0254513 | -            |
| LOC_Os12g32814 | 3.5867   | 0.4833    | -2.8916 | 0.00021 | 0.0258031 | ABCG50       |
| LOC_Os06g45960 | 2.2467   | 0.0867    | -4.6962 | 0.00022 | 0.0258769 | CYP71Z6      |
| LOC_Os04g10010 | 8.6633   | 0.4333    | -4.3214 | 0.00022 | 0.0264756 | Os04g0179200 |
| LOC_Os01g11810 | 4.0467   | 11.3367   | 1.4862  | 0.00022 | 0.0264756 | TBL38        |
| MSTRG.4545     | 4.3333   | 0.7633    | -2.5051 | 0.00022 | 0.0264756 | --           |
| LOC_Os01g63710 | 4.2400   | 1.2867    | -1.7204 | 0.00022 | 0.0264756 | CDC6         |
| LOC_Os07g14740 | 64.2267  | 21.0733   | -1.6078 | 0.00023 | 0.0266849 | -            |
| LOC_Os05g11910 | 27.5367  | 71.5833   | 1.3783  | 0.00023 | 0.027208  | At5g45910    |
| LOC_Os04g41640 | 22.0033  | 199.3667  | 3.1796  | 0.00023 | 0.027208  | Cht4         |
| LOC_Os11g22150 | 0.6100   | 0.0010    | -9.2527 | 0.00024 | 0.027208  | -            |
| LOC_Os03g48626 | 162.7100 | 351.7333  | 1.1122  | 0.00024 | 0.027208  | -            |
| LOC_Os01g02130 | 21.7067  | 4.4900    | -2.2734 | 0.00024 | 0.0274043 | -            |
| LOC_Os04g03180 | 8.6500   | 3.1300    | -1.4665 | 0.00024 | 0.0274043 | BRL2         |
| LOC_Os11g40850 | 10.6167  | 0.9833    | -3.4325 | 0.00024 | 0.0274166 | -            |
| LOC_Os01g41730 | 0.1533   | 1.5067    | 3.2966  | 0.00025 | 0.0279936 | At2g42960    |
| LOC_Os06g49970 | 1.5300   | 3.8867    | 1.3450  | 0.00025 | 0.0281522 | AMY2A        |
| LOC_Os01g04550 | 39.6600  | 5.6033    | -2.8233 | 0.00025 | 0.0281522 | GDPDL2       |
| LOC_Os12g37580 | 0.2700   | 0.0433    | -2.6394 | 0.00027 | 0.0299615 | ABCC10       |
| LOC_Os09g33720 | 0.0100   | 0.3033    | 4.9228  | 0.00027 | 0.0301954 | sec61a       |
| LOC_Os11g02369 | 448.2033 | 2952.4367 | 2.7197  | 0.00027 | 0.0302743 | LTP2-A       |
| LOC_Os02g07930 | 2.1967   | 9.0733    | 2.0463  | 0.00028 | 0.030336  | BBX32        |
| LOC_Os10g42040 | 50.6933  | 4.5800    | -3.4684 | 0.00028 | 0.030336  | -            |
| LOC_Os07g30600 | 7.0233   | 0.2300    | -4.9325 | 0.00028 | 0.030336  | FAR1         |
| LOC_Os05g37450 | 1.7933   | 4.3700    | 1.2850  | 0.00028 | 0.030336  | GWD3         |
| LOC_Os06g39080 | 0.2667   | 0.0010    | -8.0589 | 0.00028 | 0.0305004 | UGT73B5      |

|                |          |          |         |         |           |              |
|----------------|----------|----------|---------|---------|-----------|--------------|
| LOC_Os03g17350 | 1.3900   | 3.7400   | 1.4280  | 0.00028 | 0.0306244 | RCN1         |
| LOC_Os01g02560 | 20.6500  | 6.6433   | -1.6362 | 0.00028 | 0.0306244 | At1g67000    |
| LOC_Os06g39640 | 4.9800   | 11.7200  | 1.2348  | 0.00028 | 0.0306244 | PHN1         |
| LOC_Os01g28500 | 79.3167  | 353.8600 | 2.1575  | 0.00029 | 0.0315645 | PRMS         |
| LOC_Os02g55380 | 0.2700   | 1.6033   | 2.5700  | 0.0003  | 0.0316295 | ERF003       |
| LOC_Os01g32120 | 0.9200   | 2.6400   | 1.5208  | 0.0003  | 0.0320945 | CML11        |
| LOC_Os07g44060 | 2.2000   | 7.8633   | 1.8376  | 0.0003  | 0.0321539 | -            |
| LOC_Os12g44320 | 0.0800   | 0.4933   | 2.6245  | 0.0003  | 0.0321712 | At5g35370    |
| LOC_Os01g61940 | 0.7100   | 1.4900   | 1.0694  | 0.00031 | 0.0331157 | ABCG1        |
| LOC_Os05g39770 | 4.6400   | 35.3500  | 2.9295  | 0.00032 | 0.034045  | At3g08860    |
| LOC_Os05g48840 | 0.4533   | 3.3733   | 2.8955  | 0.00033 | 0.0346946 | -            |
| LOC_Os07g40870 | 0.3100   | 1.9100   | 2.6232  | 0.00033 | 0.0346946 | -            |
| LOC_Os08g39830 | 0.0367   | 0.3767   | 3.3607  | 0.00033 | 0.0347183 | EIL3         |
| LOC_Os06g43320 | 0.9967   | 7.3000   | 2.8727  | 0.00034 | 0.0347183 | CYP71D55     |
| LOC_Os11g07230 | 13.1200  | 5.1133   | -1.3594 | 0.00034 | 0.0348454 | At3g47570    |
| LOC_Os05g32970 | 43.1033  | 100.0167 | 1.2144  | 0.00034 | 0.0348454 | -            |
| LOC_Os07g26630 | 0.1533   | 2.2300   | 3.8623  | 0.00034 | 0.0348454 | PIP2-4       |
| LOC_Os10g41980 | 168.8033 | 57.5133  | -1.5534 | 0.00034 | 0.0348454 | -            |
| LOC_Os09g29210 | 2.6167   | 0.7800   | -1.7462 | 0.00034 | 0.0348454 | PUP3         |
| LOC_Os02g16995 | 0.3500   | 0.0010   | -8.4512 | 0.00034 | 0.0348596 | -            |
| LOC_Os05g31740 | 4.5600   | 0.5533   | -3.0428 | 0.00035 | 0.0348774 | CYP94A1      |
| LOC_Os04g56040 | 18.4000  | 1.4500   | -3.6656 | 0.00035 | 0.0349873 | -            |
| LOC_Os07g03170 | 13.9300  | 2.0467   | -2.7668 | 0.00035 | 0.0349873 | -            |
| LOC_Os12g36940 | 17.1933  | 2.8100   | -2.6132 | 0.00036 | 0.0361428 | CBP60B       |
| LOC_Os10g30880 | 28.4800  | 5.5000   | -2.3724 | 0.00036 | 0.0361428 | -            |
| LOC_Os01g66760 | 8.2333   | 1.1433   | -2.8482 | 0.00036 | 0.0361428 | At5g48380    |
| LOC_Os02g15930 | 0.4333   | 2.2500   | 2.3764  | 0.00038 | 0.0372215 | BAG6         |
| LOC_Os09g20090 | 7.9200   | 0.7033   | -3.4932 | 0.00038 | 0.0374586 | AAO          |
| LOC_Os02g49480 | 20.8233  | 6.2033   | -1.7471 | 0.00039 | 0.0380958 | BIM1         |
| LOC_Os03g05840 | 0.3200   | 1.4800   | 2.2095  | 0.00039 | 0.0382971 | xlnD         |
| LOC_Os11g45190 | 0.8600   | 0.0567   | -3.9238 | 0.0004  | 0.0386181 | RGA2         |
| LOC_Os02g33380 | 0.0567   | 2.0967   | 5.2095  | 0.0004  | 0.0387008 | -            |
| LOC_Os12g02700 | 12.1633  | 27.4633  | 1.1750  | 0.0004  | 0.038721  | -            |
| LOC_Os05g13360 | 0.1567   | 3.4667   | 4.4678  | 0.00041 | 0.0389473 | -            |
| LOC_Os03g45860 | 3.5733   | 0.0433   | -6.3656 | 0.00041 | 0.039072  | SAUR71       |
| LOC_Os06g37410 | 2.7033   | 0.2633   | -3.3598 | 0.00041 | 0.0394916 | BHLH         |
| LOC_Os09g37880 | 1.1733   | 0.0933   | -3.6521 | 0.00042 | 0.0395519 | At1g11330    |
| LOC_Os04g15650 | 9.4700   | 2.4100   | -1.9743 | 0.00042 | 0.0395519 | At3g47570    |
| LOC_Os06g10830 | 0.5233   | 0.0233   | -4.4873 | 0.00042 | 0.0395519 | -            |
| LOC_Os04g10000 | 5.6233   | 0.6167   | -3.1889 | 0.00043 | 0.0400222 | Os04g0179200 |
| LOC_Os07g38250 | 1.3767   | 0.1267   | -3.4421 | 0.00043 | 0.0405275 | LECRK91      |
| LOC_Os11g12240 | 4.8833   | 0.3433   | -3.8302 | 0.00044 | 0.0407495 | RPM1         |
| LOC_Os10g07229 | 24.0800  | 53.7900  | 1.1595  | 0.00044 | 0.0407821 | At1g64710    |

|                |         |         |         |         |           |              |
|----------------|---------|---------|---------|---------|-----------|--------------|
| LOC_Os04g06734 | 3.3767  | 0.6767  | -2.3191 | 0.00045 | 0.0416195 | -            |
| LOC_Os02g02380 | 1.0967  | 13.7333 | 3.6465  | 0.00046 | 0.0424505 | RUP2         |
| LOC_Os03g25490 | 0.4167  | 1.5867  | 1.9290  | 0.00047 | 0.0427305 | CYP734A1     |
| LOC_Os03g14630 | 1.4200  | 6.7467  | 2.2483  | 0.00048 | 0.0434227 | -            |
| LOC_Os06g09980 | 9.6567  | 1.7933  | -2.4289 | 0.00048 | 0.0434227 | -            |
| LOC_Os08g41960 | 1.1067  | 6.5400  | 2.5631  | 0.00048 | 0.0434592 | AGL3         |
| LOC_Os12g11860 | 3.5900  | 1.1400  | -1.6550 | 0.00048 | 0.0435523 | RPL12        |
| LOC_Os08g44870 | 20.4167 | 44.4733 | 1.1232  | 0.00049 | 0.0441008 | TT12         |
| LOC_Os07g02440 | 0.8333  | 5.4800  | 2.7172  | 0.00049 | 0.0441008 | PER51        |
| LOC_Os08g29760 | 0.5633  | 2.4533  | 2.1227  | 0.00049 | 0.0441008 | -            |
| LOC_Os01g05870 | 2.0100  | 0.3833  | -2.3905 | 0.0005  | 0.0444075 | At3g47570    |
| LOC_Os03g53360 | 0.5733  | 3.3833  | 2.5610  | 0.00051 | 0.0453591 | CER26L       |
| LOC_Os11g07200 | 0.3533  | 0.0567  | -2.6405 | 0.00051 | 0.0453591 | At3g47570    |
| LOC_Os05g13320 | 0.1900  | 0.0010  | -7.5699 | 0.00052 | 0.0456617 | SLAH3        |
| LOC_Os12g43580 | 8.5600  | 1.8400  | -2.2179 | 0.00053 | 0.0464721 | -            |
| LOC_Os09g39430 | 3.2233  | 23.7867 | 2.8835  | 0.00054 | 0.0471049 | At5g03610    |
| LOC_Os07g09190 | 20.6833 | 3.9767  | -2.3788 | 0.00054 | 0.0471681 | Os07g0190000 |
| LOC_Os02g13460 | 1.5233  | 0.3733  | -2.0287 | 0.00054 | 0.0475122 | HSL1         |
| LOC_Os09g25850 | 10.4467 | 40.3767 | 1.9505  | 0.00056 | 0.0485272 | CER3         |

---

**Table S5.** Statistical data of total differentially expressed genes (DEGs) for SN\_CK vs. SN\_D.

| <b>id</b>      | <b>SN_CK<br/>_mean</b> | <b>SN_D<br/>_mean</b> | <b>log2(fc)</b> | <b>PValue</b> | <b>FDR</b> | <b>Symbol</b> |
|----------------|------------------------|-----------------------|-----------------|---------------|------------|---------------|
| LOC_Os11g46900 | 5.7300                 | 0.0500                | -6.8405         | 1.00E-24      | 2.71E-20   | WAK5          |
| LOC_Os09g39770 | 0.0010                 | 15.7500               | 13.9431         | 1.31E-20      | 1.77E-16   | -             |
| LOC_Os09g13440 | 130.0233               | 3.4933                | -5.2180         | 4.04E-19      | 2.90E-15   | -             |
| LOC_Os07g03730 | 471.4467               | 9.1467                | -5.6877         | 4.29E-19      | 2.90E-15   | -             |
| LOC_Os04g39320 | 73.8233                | 3.6200                | -4.3500         | 3.90E-18      | 2.11E-14   | -             |
| LOC_Os02g37160 | 19.9433                | 3.7733                | -2.4020         | 5.91E-18      | 2.66E-14   | -             |
| LOC_Os03g10110 | 3.6500                 | 0.4067                | -3.1660         | 1.51E-17      | 5.54E-14   | AMP2-2        |
| LOC_Os07g05700 | 17.2667                | 2.9033                | -2.5722         | 1.64E-17      | 5.54E-14   | -             |
| LOC_Os03g21710 | 15.8867                | 1.5800                | -3.3298         | 2.81E-16      | 8.45E-13   | WRKY70        |
| LOC_Os07g03740 | 53.2900                | 2.8333                | -4.2333         | 5.02E-16      | 1.36E-12   | -             |
| LOC_Os01g68740 | 84.6033                | 8.4233                | -3.3283         | 8.45E-15      | 2.08E-11   | -             |
| LOC_Os08g15710 | 6.3900                 | 0.1700                | -5.2322         | 4.62E-14      | 1.04E-10   | -             |
| LOC_Os08g08690 | 10.8067                | 1.8933                | -2.5129         | 5.03E-14      | 1.05E-10   | -             |
| LOC_Os07g29960 | 3.9500                 | 0.0010                | -11.9476        | 1.00E-13      | 1.94E-10   | CYP87A3       |
| LOC_Os03g08480 | 7.9167                 | 26.6533               | 1.7514          | 1.08E-13      | 1.94E-10   | BP-73         |
| LOC_Os06g29730 | 90.2867                | 13.3533               | -2.7573         | 1.35E-13      | 2.29E-10   | -             |
| LOC_Os03g55180 | 13.7367                | 2.6900                | -2.3524         | 1.90E-13      | 3.03E-10   | -             |
| LOC_Os11g03230 | 8.9200                 | 1.1167                | -2.9978         | 2.18E-13      | 3.27E-10   | APY3          |
| LOC_Os11g31530 | 58.9267                | 1.4100                | -5.3852         | 3.00E-13      | 4.26E-10   | SERK1         |
| LOC_Os01g63180 | 4.4033                 | 0.0833                | -5.7236         | 3.41E-13      | 4.61E-10   | LAC6          |
| LOC_Os08g31250 | 4.9467                 | 0.2733                | -4.1777         | 1.04E-12      | 1.34E-09   | Os03g0405500  |
| LOC_Os01g19260 | 3.4767                 | 0.1667                | -4.3827         | 1.61E-12      | 1.98E-09   | bcs11b        |
| LOC_Os06g38450 | 119.3033               | 17.4400               | -2.7742         | 2.94E-12      | 3.36E-09   | SAG39         |
| LOC_Os10g39260 | 10.6667                | 0.2267                | -5.5564         | 2.99E-12      | 3.36E-09   | nep1          |
| LOC_Os01g02790 | 3.5600                 | 0.4867                | -2.8709         | 3.42E-12      | 3.70E-09   | At5g39030     |
| LOC_Os11g31540 | 26.6433                | 0.8067                | -5.0457         | 6.20E-12      | 6.45E-09   | SERK1         |
| LOC_Os12g29160 | 3.2133                 | 0.1000                | -5.0060         | 7.81E-12      | 7.82E-09   | -             |
| LOC_Os06g35700 | 9.5500                 | 0.0667                | -7.1624         | 2.79E-11      | 2.69E-08   | -             |
| LOC_Os01g13610 | 6.3167                 | 0.0467                | -7.0806         | 2.95E-11      | 2.75E-08   | IRL           |
| LOC_Os02g16940 | 16.5667                | 0.4867                | -5.0892         | 4.93E-11      | 4.45E-08   | SBT3.5        |
| LOC_Os03g62200 | 10.3967                | 0.9167                | -3.5036         | 6.20E-11      | 5.41E-08   | AMT3-2        |
| LOC_Os08g04500 | 6.9167                 | 0.3667                | -4.2375         | 7.17E-11      | 6.06E-08   | TPS2          |
| LOC_Os07g12890 | 37.8333                | 4.7300                | -2.9997         | 7.67E-11      | 6.21E-08   | ZIP8          |
| LOC_Os11g42200 | 23.4100                | 0.4400                | -5.7335         | 7.80E-11      | 6.21E-08   | LAC19         |
| LOC_Os08g13870 | 1.5333                 | 0.0633                | -4.5976         | 1.32E-10      | 1.02E-07   | RLK1          |
| LOC_Os10g30560 | 10.4300                | 0.9133                | -3.5135         | 1.83E-10      | 1.38E-07   | UGT86A1       |
| LOC_Os01g04280 | 32.9233                | 6.7100                | -2.2947         | 2.13E-10      | 1.56E-07   | SARD1         |
| LOC_Os03g01300 | 72.8067                | 10.5400               | -2.7882         | 2.40E-10      | 1.71E-07   | AZI1          |
| LOC_Os12g15680 | 3.9733                 | 0.0300                | -7.0492         | 2.66E-10      | 1.84E-07   | LAC24         |

|                     |          |          |          |          |          |              |
|---------------------|----------|----------|----------|----------|----------|--------------|
| LOC_Os07g31070      | 5.3900   | 0.2833   | -4.2497  | 2.72E-10 | 1.84E-07 | At2g01680    |
| LOC_Os10g39300      | 4.4200   | 0.1000   | -5.4660  | 3.17E-10 | 2.09E-07 | nep1         |
| LOC_Os01g09150      | 3.9767   | 0.2000   | -4.3135  | 3.79E-10 | 2.44E-07 | -            |
| MSTRG.26475         | 68.4433  | 2.9867   | -4.5183  | 3.92E-10 | 2.47E-07 | --           |
| LOC_Os01g58280      | 56.4200  | 4.7900   | -3.5581  | 5.32E-10 | 3.27E-07 | SBT3.5       |
| LOC_Os11g38790      | 4.5533   | 0.3867   | -3.5578  | 5.67E-10 | 3.41E-07 | -            |
| LOC_Os03g29190      | 35.6533  | 9.3400   | -1.9325  | 7.94E-10 | 4.62E-07 | Os03g0405500 |
| MSTRG.22412         | 131.1800 | 9.0833   | -3.8522  | 8.02E-10 | 4.62E-07 | --           |
| LOC_Os03g01320      | 5.8800   | 0.4500   | -3.7078  | 8.63E-10 | 4.86E-07 | At4g12490    |
| LOC_Os09g20090      | 7.9200   | 0.2100   | -5.2370  | 9.33E-10 | 5.15E-07 | AAO          |
| LOC_Os06g43384      | 1.4233   | 0.0467   | -4.9307  | 1.14E-09 | 6.16E-07 | CYP71D7      |
| LOC_Os11g47630      | 7.7100   | 0.1567   | -5.6210  | 1.18E-09 | 6.22E-07 | ZAT8         |
| LOC_Os01g28450      | 778.0033 | 37.1400  | -4.3887  | 1.20E-09 | 6.22E-07 | -            |
| LOC_Os06g46330      | 8.0933   | 2.6733   | -1.5981  | 1.23E-09 | 6.26E-07 | At1g56140    |
| LOC_Os08g38710      | 65.9533  | 242.9767 | 1.8813   | 1.84E-09 | 9.20E-07 | RFS1         |
| ChrSy.fgenes.h.gene | 11.4800  | 1.8333   | -2.6466  | 2.80E-09 | 1.38E-06 | WAK3         |
| LOC_Os03g24820      | 4.1567   | 0.2100   | -4.3070  | 4.57E-09 | 2.21E-06 | -            |
| LOC_Os11g44630      | 11.0967  | 0.4833   | -4.5210  | 5.35E-09 | 2.51E-06 | -            |
| LOC_Os07g07290      | 27.9667  | 4.4200   | -2.6616  | 5.38E-09 | 2.51E-06 | -            |
| LOC_Os11g13750      | 2.2000   | 0.0267   | -6.3663  | 5.91E-09 | 2.68E-06 | -            |
| LOC_Os11g01030      | 0.0010   | 0.4367   | 8.7704   | 6.00E-09 | 2.68E-06 | -            |
| LOC_Os07g34850      | 9.3867   | 0.6300   | -3.8972  | 6.04E-09 | 2.68E-06 | nep1         |
| MSTRG.7258          | 10.7000  | 0.4667   | -4.5191  | 7.03E-09 | 3.06E-06 | --           |
| LOC_Os06g09980      | 9.6567   | 1.6233   | -2.5726  | 8.15E-09 | 3.50E-06 | -            |
| LOC_Os01g02780      | 15.5200  | 3.6167   | -2.1014  | 9.15E-09 | 3.87E-06 | At1g67000    |
| LOC_Os01g43750      | 16.5600  | 1.8733   | -3.1440  | 1.04E-08 | 4.34E-06 | CYP72A15     |
| LOC_Os03g58290      | 7.5300   | 0.4733   | -3.9917  | 1.16E-08 | 4.74E-06 | BX1          |
| LOC_Os01g68730      | 4.5433   | 0.5233   | -3.1179  | 1.40E-08 | 5.63E-06 | -            |
| LOC_Os05g14820      | 1.4267   | 0.0010   | -10.4784 | 1.44E-08 | 5.74E-06 | LHT1         |
| LOC_Os07g37385      | 2.3133   | 0.0010   | -11.1758 | 1.66E-08 | 6.50E-06 | fhaB         |
| MSTRG.21425         | 5.9933   | 0.2367   | -4.6624  | 1.89E-08 | 7.32E-06 | --           |
| LOC_Os08g01950      | 3.1133   | 0.3100   | -3.3281  | 2.18E-08 | 8.32E-06 | At3g50280    |
| LOC_Os04g27020      | 13.2767  | 0.3800   | -5.1267  | 2.39E-08 | 8.96E-06 | CYP71Z7      |
| LOC_Os10g36848      | 16.2600  | 1.5033   | -3.4351  | 3.10E-08 | 1.13E-05 | CYP84A1      |
| LOC_Os05g19910      | 9.4133   | 0.7200   | -3.7086  | 3.10E-08 | 1.13E-05 | TAT          |
| LOC_Os01g68720      | 13.0100  | 2.2300   | -2.5445  | 3.22E-08 | 1.16E-05 | -            |
| LOC_Os02g17590      | 9.4667   | 0.1533   | -5.9481  | 3.38E-08 | 1.19E-05 | -            |
| LOC_Os04g30060      | 8.4067   | 0.5367   | -3.9694  | 3.44E-08 | 1.19E-05 | WAKL10       |
| LOC_Os02g53100      | 1.3100   | 0.0167   | -6.2965  | 3.44E-08 | 1.19E-05 | WRKY9        |
| LOC_Os10g34700      | 2.8300   | 0.4367   | -2.6962  | 3.95E-08 | 1.34E-05 | -            |
| LOC_Os05g04930      | 8.1000   | 0.3067   | -4.7232  | 3.95E-08 | 1.34E-05 | HSR201       |
| LOC_Os08g26230      | 211.2167 | 47.2667  | -2.1598  | 4.45E-08 | 1.49E-05 | -            |
| LOC_Os04g58870      | 2.0200   | 13.1100  | 2.6982   | 4.57E-08 | 1.51E-05 | EXO70A1      |

|                |          |         |          |          |           |              |
|----------------|----------|---------|----------|----------|-----------|--------------|
| LOC_Os02g13460 | 1.5233   | 0.2067  | -2.8819  | 5.10E-08 | 1.66E-05  | HSL1         |
| LOC_Os04g49194 | 36.1600  | 2.1433  | -4.0765  | 5.17E-08 | 1.66E-05  | -            |
| LOC_Os08g30100 | 4.4133   | 0.2433  | -4.1809  | 6.98E-08 | 2.21E-05  | At1g06620    |
| LOC_Os03g38800 | 1.9800   | 0.2633  | -2.9105  | 7.03E-08 | 2.21E-05  | SPAC644.07   |
| LOC_Os05g08910 | 9.1667   | 2.1300  | -2.1055  | 8.11E-08 | 2.50E-05  | -            |
| LOC_Os12g43580 | 8.5600   | 1.3233  | -2.6934  | 8.13E-08 | 2.50E-05  | -            |
| LOC_Os03g12500 | 29.7733  | 1.7033  | -4.1276  | 9.10E-08 | 2.76E-05  | CYP74A2      |
| LOC_Os08g33150 | 4.0300   | 0.4867  | -3.0498  | 9.29E-08 | 2.79E-05  | ODO1         |
| LOC_Os09g18360 | 3.5000   | 0.4400  | -2.9918  | 1.06E-07 | 3.16E-05  | At1g51860    |
| LOC_Os02g37180 | 10.7767  | 1.2500  | -3.1079  | 1.11E-07 | 3.26E-05  | -            |
| LOC_Os02g13430 | 5.9900   | 0.8500  | -2.8170  | 1.18E-07 | 3.42E-05  | HSL1         |
| LOC_Os12g36830 | 137.7633 | 6.9000  | -4.3195  | 1.21E-07 | 3.48E-05  | -            |
| LOC_Os01g47070 | 158.5767 | 15.5367 | -3.3514  | 1.34E-07 | 3.81E-05  | CHIT3        |
| LOC_Os01g38359 | 27.0500  | 4.6967  | -2.5259  | 1.35E-07 | 3.81E-05  | FKBP65       |
| LOC_Os11g44430 | 9.7367   | 0.8033  | -3.5994  | 1.37E-07 | 3.82E-05  | At3g07070    |
| LOC_Os12g36880 | 279.1700 | 21.2200 | -3.7176  | 1.46E-07 | 4.03E-05  | MALD1        |
| LOC_Os08g39850 | 74.3033  | 4.3367  | -4.0988  | 1.56E-07 | 4.26E-05  | CM-LOX2      |
| LOC_Os07g40690 | 2.1233   | 0.1033  | -4.3610  | 1.86E-07 | 5.03E-05  | BAN          |
| LOC_Os04g10940 | 3.9833   | 0.2367  | -4.0730  | 1.90E-07 | 5.08E-05  | -            |
| LOC_Os06g22290 | 1.2967   | 0.1367  | -3.2461  | 1.94E-07 | 5.15E-05  | LECRKS5      |
| LOC_Os09g15560 | 1.3167   | 0.0867  | -3.9253  | 2.06E-07 | 5.40E-05  | -            |
| LOC_Os05g25770 | 307.9167 | 97.3033 | -1.6620  | 2.23E-07 | 5.79E-05  | WRKY70       |
| LOC_Os09g39650 | 32.5233  | 4.7600  | -2.7724  | 2.36E-07 | 6.07E-05  | PUB33        |
| LOC_Os04g08550 | 20.3233  | 4.4333  | -2.1967  | 2.70E-07 | 6.89E-05  | Os10g0113000 |
| LOC_Os06g05480 | 53.3667  | 21.1467 | -1.3355  | 2.80E-07 | 7.04E-05  | -            |
| LOC_Os01g18744 | 3.1667   | 0.7767  | -2.0276  | 2.81E-07 | 7.04E-05  | TAX10        |
| LOC_Os11g28184 | 3.0533   | 8.6867  | 1.5084   | 2.88E-07 | 7.15E-05  | -            |
| LOC_Os04g59200 | 150.3967 | 12.3000 | -3.6120  | 3.07E-07 | 7.55E-05  | Sb03g046810  |
| LOC_Os06g38120 | 32.6433  | 4.1100  | -2.9896  | 3.20E-07 | 7.79E-05  | -            |
| LOC_Os07g41960 | 6.8600   | 0.3900  | -4.1367  | 3.27E-07 | 7.90E-05  | -            |
| LOC_Os04g30030 | 6.6333   | 0.7533  | -3.1384  | 3.64E-07 | 8.70E-05  | CRK10        |
| LOC_Os02g48770 | 9.4200   | 1.0467  | -3.1699  | 3.76E-07 | 8.92E-05  | AAMT1        |
| LOC_Os10g39710 | 22.4300  | 3.6467  | -2.6208  | 3.82E-07 | 8.98E-05  | SSL5         |
| LOC_Os02g36140 | 21.0633  | 1.3767  | -3.9355  | 3.88E-07 | 9.05E-05  | KSL7         |
| LOC_Os11g07690 | 2.2567   | 0.0010  | -11.1400 | 4.11E-07 | 9.46E-05  | DIR19        |
| LOC_Os11g41034 | 2.1300   | 0.1867  | -3.5123  | 4.13E-07 | 9.46E-05  | -            |
| LOC_Os02g50470 | 46.0333  | 3.6867  | -3.6423  | 4.64E-07 | 0.0001055 | -            |
| LOC_Os09g26144 | 3.6933   | 0.5167  | -2.8376  | 4.69E-07 | 0.0001057 | GLR2.8       |
| LOC_Os06g38870 | 8.7833   | 1.0967  | -3.0016  | 4.93E-07 | 0.0001102 | -            |
| LOC_Os07g48260 | 9.9700   | 2.4000  | -2.0546  | 5.55E-07 | 0.0001231 | WRKY54       |
| LOC_Os01g60740 | 0.9433   | 0.0010  | -9.8816  | 5.66E-07 | 0.0001244 | -            |
| LOC_Os04g56030 | 10.2800  | 1.1700  | -3.1353  | 5.90E-07 | 0.0001286 | -            |
| LOC_Os03g44710 | 10.1267  | 3.5633  | -1.5069  | 6.33E-07 | 0.0001369 | YAB2         |



|                |          |          |          |          |           |              |
|----------------|----------|----------|----------|----------|-----------|--------------|
| LOC_Os02g50460 | 9.4800   | 0.5400   | -4.1339  | 6.89E-07 | 0.0001479 | PUB20        |
| LOC_Os03g06705 | 0.9467   | 0.0267   | -5.1497  | 7.65E-07 | 0.0001629 | KCS11        |
| LOC_Os09g23450 | 3.9567   | 0.0010   | -11.9501 | 7.92E-07 | 0.0001673 | -            |
| LOC_Os05g50100 | 25.0267  | 2.2467   | -3.4776  | 8.06E-07 | 0.000169  | -            |
| LOC_Os05g30760 | 10.1500  | 0.4500   | -4.4954  | 8.17E-07 | 0.0001699 | PIR7B        |
| MSTRG.4664     | 4.3967   | 0.7667   | -2.5197  | 8.37E-07 | 0.0001726 | --           |
| LOC_Os09g29560 | 1.4100   | 0.1700   | -3.0521  | 8.44E-07 | 0.0001726 | WAK3         |
| LOC_Os12g04360 | 11.6000  | 2.3567   | -2.2993  | 8.49E-07 | 0.0001726 | CML36        |
| LOC_Os09g13400 | 0.6567   | 0.0010   | -9.3590  | 8.66E-07 | 0.0001748 | -            |
| LOC_Os12g11860 | 3.5900   | 0.8633   | -2.0560  | 8.96E-07 | 0.000179  | RLP12        |
| LOC_Os10g14170 | 3.0700   | 23.2900  | 2.9234   | 9.00E-07 | 0.000179  | -            |
| LOC_Os02g41680 | 11.2000  | 3.3667   | -1.7341  | 9.12E-07 | 0.0001799 | ZB8          |
| LOC_Os01g72910 | 21.9500  | 4.0700   | -2.4311  | 9.29E-07 | 0.000182  | ASR1         |
| LOC_Os02g18070 | 5.9833   | 1.1567   | -2.3710  | 9.52E-07 | 0.0001853 | RGA2         |
| LOC_Os01g40430 | 1.3167   | 0.0010   | -10.3627 | 1.09E-06 | 0.0002101 | WRKY9        |
| LOC_Os05g45410 | 13.4467  | 2.7300   | -2.3003  | 1.10E-06 | 0.0002101 | HSFA4D       |
| LOC_Os12g04690 | 0.9267   | 0.1467   | -2.6595  | 1.10E-06 | 0.0002101 | -            |
| LOC_Os01g48020 | 2.2933   | 0.2767   | -3.0512  | 1.16E-06 | 0.000219  | At1g34300    |
| LOC_Os12g14440 | 5.9667   | 0.3667   | -4.0244  | 1.19E-06 | 0.0002235 | SALT         |
| LOC_Os11g44700 | 2.6500   | 0.2367   | -3.4851  | 1.27E-06 | 0.0002375 | -            |
| LOC_Os08g31200 | 0.7600   | 0.0200   | -5.2479  | 1.31E-06 | 0.0002413 | UGT85A24     |
| LOC_Os11g05800 | 14.3733  | 1.9533   | -2.8794  | 1.31E-06 | 0.0002413 | HVA22J       |
| LOC_Os04g51880 | 87.1767  | 205.8100 | 1.2393   | 1.34E-06 | 0.0002437 | GALAK        |
| LOC_Os06g38764 | 173.6867 | 11.5967  | -3.9047  | 1.34E-06 | 0.0002437 | -            |
| LOC_Os04g56040 | 18.4000  | 1.0267   | -4.1637  | 1.38E-06 | 0.0002493 | -            |
| LOC_Os06g29844 | 11.3300  | 4.5900   | -1.3036  | 1.42E-06 | 0.0002541 | DTXL1        |
| LOC_Os07g43800 | 18.1000  | 8.0467   | -1.1695  | 1.56E-06 | 0.0002771 | CML45        |
| LOC_Os12g36940 | 17.1933  | 2.1167   | -3.0220  | 1.58E-06 | 0.0002791 | CBP60B       |
| LOC_Os07g41410 | 74.7200  | 15.0733  | -2.3095  | 1.60E-06 | 0.0002802 | Ea1          |
| LOC_Os01g59730 | 5.6800   | 1.4933   | -1.9274  | 1.64E-06 | 0.0002861 | RPL30        |
| LOC_Os04g47420 | 10.4833  | 2.6933   | -1.9606  | 1.65E-06 | 0.0002864 | AATL1        |
| LOC_Os11g37860 | 4.0033   | 1.7767   | -1.1720  | 1.66E-06 | 0.0002864 | RPP13        |
| LOC_Os04g50940 | 18.0467  | 0.8033   | -4.4896  | 1.78E-06 | 0.0003053 | NPF8.3       |
| LOC_Os03g13740 | 3.6700   | 0.2133   | -4.1046  | 2.00E-06 | 0.0003402 | PUB21        |
| LOC_Os06g40050 | 19.3467  | 49.2500  | 1.3480   | 2.05E-06 | 0.0003459 | BT1          |
| LOC_Os02g57350 | 2.1500   | 0.3300   | -2.7038  | 2.25E-06 | 0.0003774 | -            |
| LOC_Os10g42040 | 50.6933  | 6.8333   | -2.8911  | 2.29E-06 | 0.0003819 | -            |
| LOC_Os03g20330 | 73.4267  | 22.3433  | -1.7165  | 2.36E-06 | 0.0003911 | -            |
| LOC_Os01g02420 | 3.2367   | 1.1933   | -1.4395  | 2.39E-06 | 0.0003936 | At5g39020    |
| LOC_Os06g04010 | 4.2500   | 11.7533  | 1.4675   | 2.59E-06 | 0.0004251 | Os06g0130600 |
| LOC_Os12g24320 | 58.7500  | 8.4333   | -2.8004  | 2.61E-06 | 0.0004258 | bcs11b       |
| LOC_Os01g51754 | 25.8567  | 65.6767  | 1.3448   | 2.64E-06 | 0.0004278 | AMY3         |
| LOC_Os12g43970 | 12.0300  | 1.8833   | -2.6753  | 2.77E-06 | 0.0004466 | EPHX2        |

|                |          |         |         |          |           |                   |
|----------------|----------|---------|---------|----------|-----------|-------------------|
| LOC_Os06g45960 | 2.2467   | 0.0933  | -4.5892 | 2.80E-06 | 0.0004482 | CYP71Z6           |
| LOC_Os03g14642 | 5.4500   | 25.7000 | 2.2374  | 2.83E-06 | 0.00045   | -                 |
| LOC_Os06g41770 | 25.5733  | 11.0233 | -1.2141 | 2.85E-06 | 0.00045   | BZIP60            |
| LOC_Os05g07450 | 0.8033   | 0.0067  | -6.9129 | 2.87E-06 | 0.000452  | At2g19130         |
| LOC_Os06g37070 | 48.0033  | 15.7800 | -1.6050 | 2.90E-06 | 0.0004532 | Tmem258           |
| LOC_Os12g36850 | 135.6733 | 9.5300  | -3.8315 | 3.15E-06 | 0.0004887 | BETV1D            |
| LOC_Os04g39180 | 0.1900   | 1.6633  | 3.1300  | 3.16E-06 | 0.0004887 | At2g42960         |
| LOC_Os09g20460 | 10.6533  | 2.8533  | -1.9006 | 3.27E-06 | 0.0005011 | -                 |
| LOC_Os05g01570 | 5.6000   | 1.8667  | -1.5850 | 3.28E-06 | 0.0005011 | At5g64700         |
| LOC_Os11g02530 | 3.6467   | 0.4233  | -3.1067 | 3.35E-06 | 0.000507  | WRKY70            |
| LOC_Os02g36190 | 7.3933   | 0.5967  | -3.6312 | 3.38E-06 | 0.000507  | CYP71Z7           |
| LOC_Os02g49480 | 20.8233  | 5.7967  | -1.8449 | 3.39E-06 | 0.000507  | BIM1              |
| LOC_Os06g09920 | 4.8933   | 12.0400 | 1.2989  | 3.39E-06 | 0.000507  | -                 |
| LOC_Os08g39840 | 128.2300 | 11.1533 | -3.5232 | 3.54E-06 | 0.0005253 | CM-LOX1           |
| LOC_Os12g27254 | 5.7400   | 0.9100  | -2.6571 | 3.63E-06 | 0.0005367 | HSR201            |
| LOC_Os10g37570 | 3.3433   | 0.1967  | -4.0875 | 3.78E-06 | 0.0005551 | -                 |
| LOC_Os05g05030 | 9.5033   | 2.6133  | -1.8625 | 3.93E-06 | 0.0005746 | -                 |
| LOC_Os07g48050 | 10.2867  | 1.0400  | -3.3061 | 4.00E-06 | 0.000581  | -                 |
| MSTRG.15315    | 46.5367  | 17.9900 | -1.3712 | 4.02E-06 | 0.000581  | --                |
| LOC_Os06g20790 | 4.4933   | 0.6633  | -2.7600 | 4.06E-06 | 0.0005846 | AAMT1I            |
| LOC_Os04g29770 | 15.8367  | 1.9400  | -3.0291 | 4.29E-06 | 0.0006142 | WAK3              |
| LOC_Os07g44890 | 17.6833  | 5.9533  | -1.5706 | 4.34E-06 | 0.000617  | CXE18             |
| LOC_Os07g18230 | 3.0500   | 0.5533  | -2.4626 | 4.38E-06 | 0.0006181 | LECRK41           |
| LOC_Os01g15830 | 3.6033   | 0.4467  | -3.0121 | 4.39E-06 | 0.0006181 | PER72             |
| LOC_Os09g34160 | 5.3833   | 0.9133  | -2.5593 | 4.41E-06 | 0.0006181 | RPM1              |
| LOC_Os12g01590 | 23.1500  | 50.2833 | 1.1191  | 4.73E-06 | 0.00066   | -                 |
| LOC_Os02g40320 | 0.2533   | 1.0933  | 2.1096  | 4.97E-06 | 0.0006879 | MEL1              |
| LOC_Os10g39750 | 1.4400   | 0.0867  | -4.0544 | 4.99E-06 | 0.0006879 | BHLH93            |
| LOC_Os02g41670 | 6.2500   | 0.3000  | -4.3808 | 5.13E-06 | 0.0007046 | ZB8               |
| LOC_Os01g10110 | 3.1267   | 0.1533  | -4.3499 | 5.43E-06 | 0.0007422 | CKX2              |
| LOC_Os11g02130 | 0.7567   | 3.2700  | 2.1116  | 5.59E-06 | 0.000759  | GSVIVT00023967001 |
| MSTRG.19622    | 29.6233  | 13.4100 | -1.1434 | 5.92E-06 | 0.0008008 | --                |
| LOC_Os08g44210 | 17.0833  | 6.7533  | -1.3389 | 6.65E-06 | 0.0008953 | FOLB2             |
| LOC_Os07g30590 | 17.1000  | 0.7900  | -4.4360 | 6.86E-06 | 0.0009185 | LTPL1             |
| LOC_Os06g16640 | 41.8500  | 2.2500  | -4.2172 | 6.91E-06 | 0.0009195 | -                 |
| LOC_Os12g32814 | 3.5867   | 0.4800  | -2.9015 | 6.94E-06 | 0.0009195 | ABCG50            |
| LOC_Os10g30410 | 5.3200   | 0.6933  | -2.9398 | 6.97E-06 | 0.00092   | CYP71Z6           |
| LOC_Os11g04600 | 1.2733   | 0.1300  | -3.2920 | 7.14E-06 | 0.0009379 | NPR6              |
| LOC_Os02g39660 | 9.7733   | 1.3500  | -2.8559 | 7.21E-06 | 0.0009419 | EFR               |
| LOC_Os11g48000 | 2.7167   | 0.4200  | -2.6934 | 7.30E-06 | 0.0009473 | RBE               |
| LOC_Os10g04570 | 3.2467   | 0.8000  | -2.0209 | 7.32E-06 | 0.0009473 | -                 |
| LOC_Os01g71700 | 3.2833   | 0.3233  | -3.3441 | 7.62E-06 | 0.0009723 | BAT1              |
| LOC_Os01g40499 | 4.6333   | 1.5633  | -1.5674 | 7.62E-06 | 0.0009723 | At2g19130         |

|                |          |          |         |          |           |              |
|----------------|----------|----------|---------|----------|-----------|--------------|
| LOC_Os07g33780 | 109.2567 | 16.2967  | -2.7451 | 7.62E-06 | 0.0009723 | ABCG43       |
| LOC_Os08g02900 | 8.2733   | 21.6467  | 1.3876  | 8.31E-06 | 0.0010545 | -            |
| LOC_Os04g44354 | 6.5667   | 1.3500   | -2.2822 | 8.98E-06 | 0.0011342 | UGT82A1      |
| LOC_Os09g39190 | 1.9233   | 0.3467   | -2.4720 | 9.31E-06 | 0.0011712 | RGLG1        |
| LOC_Os07g03040 | 9.1733   | 1.1267   | -3.0254 | 9.40E-06 | 0.0011742 | -            |
| LOC_Os11g46810 | 0.9633   | 0.1067   | -3.1749 | 9.42E-06 | 0.0011742 | WAK1         |
| LOC_Os06g20920 | 4.3033   | 0.8467   | -2.3456 | 9.49E-06 | 0.0011777 | AAMT1        |
| LOC_Os03g60850 | 18.3067  | 6.5933   | -1.4733 | 9.78E-06 | 0.001202  | NPF5.7       |
| LOC_Os11g29840 | 1.7833   | 0.3000   | -2.5715 | 1.00E-05 | 0.0012253 | -            |
| LOC_Os02g15810 | 0.7133   | 0.0400   | -4.1565 | 1.09E-05 | 0.0013219 | HMGB13       |
| LOC_Os09g26960 | 49.0367  | 7.0367   | -2.8009 | 1.10E-05 | 0.0013328 | CYP75B1      |
| LOC_Os04g03830 | 5.6733   | 0.6367   | -3.1556 | 1.12E-05 | 0.0013538 | WAK5         |
| LOC_Os12g35940 | 1.6500   | 4.1000   | 1.3132  | 1.13E-05 | 0.0013538 | -            |
| LOC_Os08g04540 | 8.5433   | 0.4633   | -4.2047 | 1.13E-05 | 0.0013547 | TDC          |
| LOC_Os06g46160 | 1.7400   | 0.1000   | -4.1210 | 1.17E-05 | 0.0013979 | -            |
| LOC_Os03g47810 | 5.9467   | 0.5733   | -3.3746 | 1.18E-05 | 0.0014015 | NFD4         |
| LOC_Os07g48790 | 0.4833   | 0.0010   | -8.9169 | 1.20E-05 | 0.0014198 | KINB1        |
| LOC_Os02g36030 | 1.7467   | 0.1633   | -3.4187 | 1.23E-05 | 0.0014518 | CYP76M5      |
| LOC_Os05g33900 | 4.1233   | 0.5900   | -2.8050 | 1.27E-05 | 0.0014863 | At5g07050    |
| LOC_Os03g28260 | 20.5400  | 5.5200   | -1.8957 | 1.28E-05 | 0.0014863 | LEA5-A       |
| LOC_Os02g18080 | 5.2733   | 1.0667   | -2.3056 | 1.32E-05 | 0.0015292 | RGA2         |
| LOC_Os04g45590 | 1.2733   | 0.1267   | -3.3295 | 1.32E-05 | 0.0015292 | -            |
| LOC_Os12g11660 | 7.7200   | 1.3333   | -2.5336 | 1.35E-05 | 0.0015505 | -            |
| LOC_Os08g15149 | 32.9633  | 4.3333   | -2.9273 | 1.41E-05 | 0.0016172 | -            |
| LOC_Os11g33394 | 2.8300   | 0.7467   | -1.9223 | 1.42E-05 | 0.0016207 | At3g47200    |
| LOC_Os04g10010 | 8.6633   | 0.4733   | -4.1940 | 1.43E-05 | 0.0016255 | Os04g0179200 |
| LOC_Os12g14150 | 1.0667   | 3.9400   | 1.8851  | 1.46E-05 | 0.0016542 | MED15A       |
| LOC_Os04g10924 | 4.4400   | 1.0333   | -2.1033 | 1.47E-05 | 0.001659  | -            |
| LOC_Os02g01100 | 12.8167  | 39.6333  | 1.6287  | 1.48E-05 | 0.0016648 | AVT1         |
| LOC_Os07g34070 | 8.0133   | 1.8833   | -2.0891 | 1.54E-05 | 0.0017153 | At5g64700    |
| LOC_Os05g47870 | 7.3800   | 17.5533  | 1.2501  | 1.54E-05 | 0.0017175 | -            |
| MSTRG.3494     | 20.7933  | 10.2133  | -1.0257 | 1.64E-05 | 0.0018157 | RPL5B        |
| MSTRG.9499     | 38.3567  | 77.6300  | 1.0171  | 1.66E-05 | 0.0018255 | --           |
| LOC_Os06g09900 | 447.4700 | 914.1733 | 1.0307  | 1.66E-05 | 0.0018255 | -            |
| LOC_Os02g49720 | 8.5200   | 18.7000  | 1.1341  | 1.72E-05 | 0.0018785 | ALDH2B7      |
| LOC_Os07g41060 | 7.8133   | 0.8800   | -3.1504 | 1.72E-05 | 0.0018785 | DFR          |
| LOC_Os08g39500 | 25.5967  | 9.8100   | -1.3836 | 1.77E-05 | 0.0019199 | RPL31        |
| LOC_Os09g26999 | 2.2800   | 0.2967   | -2.9421 | 1.78E-05 | 0.0019265 | GG3          |
| LOC_Os07g42310 | 14.8433  | 5.7367   | -1.3715 | 1.84E-05 | 0.0019755 | tmem87a      |
| LOC_Os03g59770 | 3.0533   | 0.5733   | -2.4129 | 1.85E-05 | 0.0019755 | -            |
| LOC_Os12g41650 | 18.9433  | 39.6733  | 1.0665  | 1.91E-05 | 0.0020284 | PIF1         |
| LOC_Os06g03580 | 104.0867 | 28.7000  | -1.8587 | 1.91E-05 | 0.0020284 | BB           |
| LOC_Os04g03920 | 12.7500  | 2.0433   | -2.6415 | 1.93E-05 | 0.0020405 | -            |

|                |          |          |         |          |           |              |
|----------------|----------|----------|---------|----------|-----------|--------------|
| LOC_Os09g29540 | 12.1167  | 1.8533   | -2.7088 | 2.01E-05 | 0.002116  | WAK5         |
| LOC_Os04g15920 | 13.6033  | 1.2100   | -3.4909 | 2.02E-05 | 0.0021196 | CAD6         |
| LOC_Os12g26470 | 0.5933   | 0.0010   | -9.2127 | 2.20E-05 | 0.0022869 | nep1         |
| LOC_Os03g08460 | 12.3467  | 2.0200   | -2.6117 | 2.20E-05 | 0.0022869 | ERF073       |
| LOC_Os05g01350 | 1.1233   | 2.9200   | 1.3782  | 2.42E-05 | 0.0025094 | FH14         |
| LOC_Os11g44380 | 30.2500  | 13.5300  | -1.1608 | 2.49E-05 | 0.0025695 | -            |
| LOC_Os06g39120 | 74.8200  | 22.1433  | -1.7566 | 2.55E-05 | 0.002625  | -            |
| LOC_Os04g58090 | 9.4867   | 1.2767   | -2.8935 | 2.62E-05 | 0.0026868 | YLS9         |
| LOC_Os09g09650 | 2.3967   | 0.3767   | -2.6697 | 2.65E-05 | 0.0027009 | -            |
| LOC_Os11g38640 | 0.0400   | 0.4067   | 3.3458  | 2.67E-05 | 0.0027151 | -            |
| LOC_Os02g32814 | 76.9700  | 221.9400 | 1.5278  | 2.70E-05 | 0.0027324 | SLAH3        |
| LOC_Os11g40850 | 10.6167  | 0.6500   | -4.0297 | 2.76E-05 | 0.0027882 | -            |
| LOC_Os04g30330 | 1.5500   | 0.1067   | -3.8611 | 2.77E-05 | 0.0027882 | WAKL2        |
| LOC_Os12g08930 | 7.8767   | 0.7467   | -3.3990 | 2.90E-05 | 0.0028942 | -            |
| LOC_Os05g32170 | 4.7133   | 9.9600   | 1.0794  | 2.98E-05 | 0.002961  | At3g51990    |
| LOC_Os01g26210 | 1.4467   | 0.2700   | -2.4217 | 3.01E-05 | 0.0029858 | WAK3         |
| LOC_Os05g03460 | 1.5400   | 3.7900   | 1.2993  | 3.04E-05 | 0.0030034 | At3g07070    |
| LOC_Os08g26850 | 12.6700  | 4.3533   | -1.5412 | 3.25E-05 | 0.0031956 | -            |
| LOC_Os06g06560 | 1.6733   | 5.2733   | 1.6560  | 3.37E-05 | 0.0032953 | Os06g0160700 |
| LOC_Os07g04560 | 8.2867   | 0.7333   | -3.4983 | 3.38E-05 | 0.0032953 | JUB1         |
| LOC_Os04g22120 | 15.7333  | 2.3800   | -2.7248 | 3.45E-05 | 0.0033365 | LECRK91      |
| LOC_Os01g56080 | 5.4967   | 1.1400   | -2.2695 | 3.45E-05 | 0.0033365 | -            |
| LOC_Os03g25490 | 0.4167   | 1.7467   | 2.0676  | 3.45E-05 | 0.0033365 | CYP734A1     |
| LOC_Os10g33760 | 2.9633   | 0.5133   | -2.5293 | 3.60E-05 | 0.003453  | NAC021       |
| LOC_Os11g05290 | 2.1633   | 0.3300   | -2.7127 | 3.60E-05 | 0.003453  | At3g17210    |
| LOC_Os10g05250 | 6.9167   | 1.3200   | -2.3895 | 3.70E-05 | 0.0035218 | WAKL4        |
| LOC_Os09g04310 | 25.9767  | 5.9267   | -2.1319 | 3.70E-05 | 0.0035218 | -            |
| MSTRG.19461    | 1.4267   | 0.0900   | -3.9866 | 3.79E-05 | 0.0035876 | WRKY55       |
| LOC_Os03g04060 | 110.9533 | 20.6167  | -2.4281 | 3.79E-05 | 0.0035876 | Cht11        |
| LOC_Os09g32100 | 1.3733   | 0.2433   | -2.4967 | 3.92E-05 | 0.0036938 | -            |
| LOC_Os01g16180 | 22.3400  | 53.3633  | 1.2562  | 3.96E-05 | 0.0037201 | EMB1691      |
| LOC_Os07g02260 | 1.2633   | 0.1000   | -3.6592 | 4.02E-05 | 0.0037618 | -            |
| LOC_Os01g02680 | 0.1667   | 0.0010   | -7.3808 | 4.04E-05 | 0.0037702 | At1g67000    |
| LOC_Os11g38520 | 3.6933   | 1.1367   | -1.7001 | 4.19E-05 | 0.0038907 | RPM1         |
| LOC_Os01g47580 | 1.0433   | 0.1333   | -2.9681 | 4.27E-05 | 0.0039549 | LPP2         |
| LOC_Os08g10150 | 1.3200   | 0.2433   | -2.4395 | 4.29E-05 | 0.0039549 | At1g56130    |
| LOC_Os08g42570 | 1.4467   | 0.1267   | -3.5136 | 4.37E-05 | 0.0040236 | At3g47200    |
| LOC_Os10g34940 | 11.1233  | 0.9467   | -3.5546 | 4.39E-05 | 0.0040242 | -            |
| LOC_Os03g57690 | 37.3033  | 80.5900  | 1.1113  | 4.41E-05 | 0.0040275 | Os03g0790900 |
| LOC_Os11g05614 | 3.5133   | 0.9900   | -1.8273 | 4.46E-05 | 0.0040545 | NAC090       |
| LOC_Os06g05410 | 20.4733  | 4.7567   | -2.1057 | 4.47E-05 | 0.0040545 | -            |
| MSTRG.24830    | 1.3433   | 0.0467   | -4.8473 | 4.53E-05 | 0.0040985 | --           |
| LOC_Os05g48210 | 35.4033  | 14.0833  | -1.3299 | 4.58E-05 | 0.0041252 | -            |

|                |          |         |         |          |           |              |
|----------------|----------|---------|---------|----------|-----------|--------------|
| LOC_Os04g58220 | 2.9500   | 0.3133  | -3.2349 | 4.60E-05 | 0.0041283 | PLT4         |
| LOC_Os04g30250 | 32.5500  | 8.3767  | -1.9582 | 4.61E-05 | 0.0041283 | WAK2         |
| LOC_Os01g03940 | 2.7533   | 0.6500  | -2.0827 | 4.63E-05 | 0.0041298 | -            |
| LOC_Os01g73200 | 124.5500 | 7.7600  | -4.0045 | 4.72E-05 | 0.0041886 | Sb03g046810  |
| LOC_Os01g02130 | 21.7067  | 5.0333  | -2.1086 | 4.72E-05 | 0.0041886 | -            |
| LOC_Os04g05650 | 188.8000 | 41.3900 | -2.1895 | 4.92E-05 | 0.004349  | -            |
| LOC_Os03g13250 | 4.2467   | 9.6433  | 1.1832  | 5.12E-05 | 0.0045105 | NPF8.3       |
| LOC_Os08g35490 | 1.1100   | 8.0567  | 2.8596  | 5.21E-05 | 0.0045722 | COPT5        |
| LOC_Os06g38660 | 173.4533 | 21.3600 | -3.0216 | 5.27E-05 | 0.004611  | -            |
| LOC_Os02g17330 | 30.1233  | 63.4333 | 1.0744  | 5.37E-05 | 0.0046806 | DAAT         |
| LOC_Os02g48870 | 28.8033  | 5.6767  | -2.3431 | 5.39E-05 | 0.0046846 | ASPG1        |
| LOC_Os01g48620 | 5.5467   | 1.0633  | -2.3830 | 5.45E-05 | 0.0047174 | -            |
| LOC_Os04g33200 | 8.5033   | 21.7833 | 1.3571  | 5.46E-05 | 0.0047174 | Hgsnat       |
| LOC_Os08g09830 | 3.2433   | 1.2133  | -1.4185 | 5.52E-05 | 0.004751  | BPM1         |
| LOC_Os06g34730 | 9.6300   | 1.4000  | -2.7821 | 5.66E-05 | 0.0048598 | -            |
| LOC_Os03g13400 | 0.2467   | 0.0010  | -7.9464 | 5.87E-05 | 0.0050092 | IDD14        |
| LOC_Os01g09990 | 4.3167   | 0.2567  | -4.0719 | 5.87E-05 | 0.0050092 | BHLH         |
| LOC_Os02g26210 | 15.9233  | 5.1300  | -1.6341 | 5.95E-05 | 0.0050586 | Os02g0460200 |
| LOC_Os01g49320 | 72.0833  | 25.4733 | -1.5007 | 6.04E-05 | 0.0051242 | -            |
| LOC_Os01g63710 | 4.2400   | 1.9767  | -1.1010 | 6.09E-05 | 0.0051422 | CDC6         |
| LOC_Os10g17940 | 1.1433   | 0.1433  | -2.9958 | 6.17E-05 | 0.0051941 | -            |
| LOC_Os01g23580 | 3.0867   | 0.2467  | -3.6454 | 6.20E-05 | 0.0052094 | -            |
| LOC_Os09g04320 | 1.8133   | 0.2400  | -2.9175 | 6.30E-05 | 0.005248  | -            |
| LOC_Os11g28540 | 3.2300   | 0.3000  | -3.4285 | 6.33E-05 | 0.005248  | -            |
| LOC_Os01g72150 | 2.5567   | 0.7300  | -1.8083 | 6.34E-05 | 0.005248  | -            |
| LOC_Os04g44950 | 20.9100  | 7.0700  | -1.5644 | 6.35E-05 | 0.005248  | SALR         |
| LOC_Os07g01560 | 104.2367 | 24.9167 | -2.0647 | 6.35E-05 | 0.005248  | STP1         |
| LOC_Os02g36280 | 3.1833   | 0.3033  | -3.3916 | 6.38E-05 | 0.0052568 | CYP76M6      |
| LOC_Os12g16520 | 4.8300   | 1.7100  | -1.4980 | 6.53E-05 | 0.0053554 | WAK2         |
| LOC_Os10g10175 | 5.5633   | 16.2867 | 1.5497  | 6.54E-05 | 0.0053554 | -            |
| LOC_Os07g28850 | 15.6067  | 2.9567  | -2.4001 | 6.82E-05 | 0.0055542 | AGO18        |
| MSTRG.4699     | 1.9367   | 0.2733  | -2.8248 | 6.85E-05 | 0.0055542 | --           |
| LOC_Os08g38990 | 14.8500  | 41.9100 | 1.4968  | 6.88E-05 | 0.0055542 | WRKY2        |
| LOC_Os06g32890 | 0.9433   | 0.1833  | -2.3633 | 6.88E-05 | 0.0055542 | Tf2-6        |
| LOC_Os04g25060 | 31.9067  | 3.6333  | -3.1345 | 6.99E-05 | 0.0056232 | CRRSP38      |
| LOC_Os01g61180 | 10.4000  | 21.8533 | 1.0713  | 7.07E-05 | 0.0056729 | EXO70B1      |
| LOC_Os06g43980 | 0.6133   | 2.1233  | 1.7916  | 7.31E-05 | 0.0058293 | -            |
| LOC_Os05g50580 | 2.8100   | 0.4200  | -2.7421 | 7.38E-05 | 0.0058665 | SCPL50       |
| LOC_Os01g61510 | 9.0833   | 1.2033  | -2.9162 | 7.47E-05 | 0.0059206 | AMT2-3       |
| LOC_Os10g23310 | 4.9333   | 0.3367  | -3.8732 | 7.59E-05 | 0.006004  | ACT-1        |
| MSTRG.5362     | 0.6867   | 0.0010  | -9.4235 | 7.64E-05 | 0.0060228 | --           |
| LOC_Os06g01972 | 6.5600   | 1.1267  | -2.5416 | 7.71E-05 | 0.006064  | At3g30340    |
| LOC_Os02g07820 | 7.2867   | 2.5867  | -1.4942 | 7.86E-05 | 0.0061606 | -            |

|                |          |          |         |           |           |              |
|----------------|----------|----------|---------|-----------|-----------|--------------|
| LOC_Os01g07370 | 56.6500  | 19.4500  | -1.5423 | 7.90E-05  | 0.0061718 | NET4B        |
| LOC_Os04g06520 | 79.3767  | 14.0700  | -2.4961 | 8.16E-05  | 0.006363  | -            |
| LOC_Os12g11510 | 0.1833   | 0.0010   | -7.5183 | 8.40E-05  | 0.0065311 | RLP12        |
| LOC_Os08g13420 | 0.6100   | 0.1233   | -2.3062 | 8.50E-05  | 0.0065792 | RLK1         |
| LOC_Os01g48360 | 26.9267  | 10.4167  | -1.3701 | 8.52E-05  | 0.0065792 | -            |
| LOC_Os03g01580 | 4.1500   | 12.1200  | 1.5462  | 8.55E-05  | 0.0065802 | -            |
| LOC_Os07g07300 | 17.8700  | 5.2567   | -1.7653 | 8.57E-05  | 0.0065802 | -            |
| LOC_Os01g53040 | 5.7000   | 1.3167   | -2.1141 | 8.60E-05  | 0.0065802 | WRKY65       |
| LOC_Os05g40630 | 2.9967   | 0.8167   | -1.8755 | 8.61E-05  | 0.0065802 | At2g38640    |
| LOC_Os05g40960 | 20.7200  | 3.1700   | -2.7085 | 8.70E-05  | 0.0066248 | APL          |
| LOC_Os12g35350 | 1.5167   | 3.2033   | 1.0787  | 8.79E-05  | 0.0066746 | ACBP4        |
| LOC_Os10g41999 | 12.1233  | 5.0467   | -1.2644 | 8.95E-05  | 0.0067768 | -            |
| LOC_Os01g57340 | 4.8600   | 2.0400   | -1.2524 | 8.98E-05  | 0.0067863 | RGA2         |
| LOC_Os12g04440 | 14.8200  | 33.2033  | 1.1638  | 9.20E-05  | 0.0069133 | IPMSA        |
| LOC_Os04g29790 | 3.0733   | 0.4300   | -2.8374 | 9.29E-05  | 0.0069605 | -            |
| LOC_Os07g46846 | 14.2400  | 1.7333   | -3.0383 | 9.42E-05  | 0.0070366 | SDR5         |
| LOC_Os10g05020 | 6.3500   | 1.2667   | -2.3257 | 9.46E-05  | 0.0070456 | CYP89A2      |
| LOC_Os12g02980 | 45.8167  | 16.6467  | -1.4606 | 9.49E-05  | 0.0070483 | APY3         |
| LOC_Os07g33690 | 2.5233   | 0.6567   | -1.9421 | 9.57E-05  | 0.0070652 | RGA2         |
| LOC_Os06g35940 | 17.0133  | 2.6300   | -2.6935 | 9.58E-05  | 0.0070652 | HD3A         |
| LOC_Os07g46930 | 0.7533   | 0.0133   | -5.8202 | 9.59E-05  | 0.0070652 | -            |
| LOC_Os07g42324 | 4.8500   | 1.6533   | -1.5526 | 9.69E-05  | 0.0071036 | -            |
| LOC_Os10g02380 | 15.7500  | 38.7200  | 1.2977  | 9.69E-05  | 0.0071036 | Os10g0113000 |
| LOC_Os04g52190 | 44.0767  | 6.2800   | -2.8112 | 9.73E-05  | 0.0071128 | VSR7         |
| LOC_Os11g44560 | 5.1667   | 1.7433   | -1.5674 | 9.91E-05  | 0.0072226 | CCR4         |
| LOC_Os10g03540 | 9.3100   | 4.2333   | -1.1370 | 0.0001006 | 0.0073159 | nhp211       |
| LOC_Os07g02970 | 3.6567   | 0.9400   | -1.9598 | 0.0001019 | 0.0073882 | -            |
| LOC_Os06g36650 | 0.1633   | 0.6300   | 1.9475  | 0.0001024 | 0.0073882 | ABCC8        |
| LOC_Os01g66840 | 9.7200   | 0.6200   | -3.9706 | 0.0001025 | 0.0073882 | PAE5         |
| LOC_Os02g53510 | 18.5933  | 7.0300   | -1.4032 | 0.0001038 | 0.0074683 | -            |
| LOC_Os01g39330 | 15.7967  | 4.7000   | -1.7489 | 0.000106  | 0.0075914 | BHLH         |
| LOC_Os04g34320 | 3.0933   | 1.0133   | -1.6101 | 0.0001061 | 0.0075914 | At2g19130    |
| LOC_Os09g13470 | 5.1133   | 1.6933   | -1.5944 | 0.0001081 | 0.0077165 | -            |
| LOC_Os01g42650 | 14.8133  | 6.4533   | -1.1988 | 0.0001089 | 0.007751  | COX5B-2      |
| LOC_Os05g05020 | 6.3733   | 1.1133   | -2.5172 | 0.0001095 | 0.0077729 | -            |
| LOC_Os01g58500 | 3.6900   | 1.1433   | -1.6904 | 0.0001106 | 0.0078324 | -            |
| LOC_Os01g73940 | 256.5133 | 117.7667 | -1.1231 | 0.0001116 | 0.0078766 | -            |
| LOC_Os11g07460 | 2.4700   | 0.7000   | -1.8191 | 0.0001127 | 0.0079222 | PCF3         |
| LOC_Os04g41900 | 1.3767   | 0.2600   | -2.4046 | 0.0001128 | 0.0079222 | -            |
| LOC_Os08g07080 | 7.7633   | 1.4633   | -2.4074 | 0.0001134 | 0.007946  | TPS2         |
| LOC_Os03g49550 | 0.4700   | 1.6433   | 1.8059  | 0.0001157 | 0.0080828 | UGT91B1      |
| LOC_Os11g31090 | 1.2733   | 5.4633   | 2.1012  | 0.0001161 | 0.0080929 | HHT1         |
| LOC_Os04g39290 | 2.9967   | 0.5300   | -2.4993 | 0.0001168 | 0.0081165 | -            |

|                |          |          |         |           |           |              |
|----------------|----------|----------|---------|-----------|-----------|--------------|
| LOC_Os12g07310 | 10.0700  | 1.4000   | -2.8466 | 0.0001187 | 0.0082103 | CBP          |
| LOC_Os04g56930 | 0.4267   | 0.0100   | -5.4150 | 0.0001208 | 0.0083144 | CIN5         |
| LOC_Os04g07260 | 2.8033   | 0.3033   | -3.2082 | 0.0001208 | 0.0083144 | -            |
| LOC_Os02g09980 | 3.8300   | 1.3200   | -1.5368 | 0.0001214 | 0.0083318 | -            |
| LOC_Os09g29200 | 373.9200 | 163.0367 | -1.1975 | 0.000122  | 0.0083496 | -            |
| LOC_Os03g20210 | 2.7900   | 0.3500   | -2.9948 | 0.000124  | 0.0084513 | nep1         |
| LOC_Os09g32120 | 0.2367   | 0.0010   | -7.8867 | 0.0001241 | 0.0084513 | -            |
| LOC_Os04g10000 | 5.6233   | 0.5633   | -3.3194 | 0.0001253 | 0.008492  | Os04g0179200 |
| LOC_Os12g03640 | 2.4667   | 0.6033   | -2.0315 | 0.0001264 | 0.0085454 | At1g34300    |
| LOC_Os06g14406 | 2.7267   | 19.1933  | 2.8154  | 0.0001268 | 0.0085519 | SYD          |
| LOC_Os07g14820 | 1.1467   | 0.0300   | -5.2563 | 0.0001271 | 0.0085525 | At3g47570    |
| LOC_Os01g11660 | 5.3167   | 2.0667   | -1.3632 | 0.0001277 | 0.0085657 | At1g28590    |
| LOC_Os02g33330 | 48.7533  | 12.5567  | -1.9570 | 0.000128  | 0.0085702 | -            |
| LOC_Os03g56500 | 4.1567   | 1.1133   | -1.9005 | 0.0001289 | 0.0086087 | -            |
| LOC_Os09g16950 | 13.4267  | 2.6700   | -2.3302 | 0.0001294 | 0.0086183 | LECRK91      |
| LOC_Os10g40710 | 0.9100   | 0.0300   | -4.9228 | 0.0001306 | 0.0086561 | EXPB2        |
| LOC_Os11g44680 | 19.0633  | 5.8100   | -1.7142 | 0.0001321 | 0.0087321 | CBP60B       |
| LOC_Os12g31540 | 3.5533   | 0.3367   | -3.3998 | 0.0001328 | 0.0087557 | CNR13        |
| LOC_Os03g52720 | 19.4133  | 3.4733   | -2.4827 | 0.0001355 | 0.008918  | MDP1         |
| LOC_Os07g31190 | 1.9167   | 0.1700   | -3.4950 | 0.0001376 | 0.0089925 | WAK2         |
| LOC_Os01g41430 | 8.4867   | 1.0300   | -3.0426 | 0.0001377 | 0.0089925 | TOGT1        |
| LOC_Os08g07890 | 4.1067   | 0.8200   | -2.3243 | 0.0001378 | 0.0089925 | SERK1        |
| LOC_Os02g43700 | 82.0367  | 39.5267  | -1.0534 | 0.000138  | 0.0089925 | At4g16820    |
| LOC_Os03g10030 | 10.8600  | 2.9233   | -1.8933 | 0.0001384 | 0.0089971 | Os03g0196400 |
| LOC_Os09g25070 | 37.3600  | 8.5467   | -2.1281 | 0.0001438 | 0.009285  | WRKY40       |
| LOC_Os02g42190 | 8.1067   | 1.2467   | -2.7010 | 0.0001444 | 0.009295  | WAK4         |
| LOC_Os05g03610 | 19.0400  | 5.5267   | -1.7846 | 0.000145  | 0.0093166 | PLC2         |
| LOC_Os06g39880 | 1.3233   | 0.1400   | -3.2407 | 0.0001464 | 0.0093816 | CYP734A4     |
| LOC_Os01g03680 | 1.7800   | 0.2500   | -2.8319 | 0.0001497 | 0.0095251 | RBB13.3      |
| LOC_Os01g32460 | 63.1567  | 12.0833  | -2.3859 | 0.0001498 | 0.0095251 | -            |
| LOC_Os11g04954 | 11.3233  | 4.8300   | -1.2292 | 0.0001498 | 0.0095251 | LIM15        |
| LOC_Os10g26500 | 1.0233   | 0.1433   | -2.8358 | 0.0001501 | 0.0095251 | HOX23        |
| LOC_Os10g35950 | 58.1167  | 4.7300   | -3.6190 | 0.0001505 | 0.0095301 | HSR201       |
| LOC_Os07g44440 | 14.3067  | 29.0633  | 1.0225  | 0.0001565 | 0.009873  | Os07g0638400 |
| LOC_Os10g42130 | 21.4167  | 2.9867   | -2.8421 | 0.0001566 | 0.009873  | NAC086       |
| LOC_Os03g04310 | 0.7233   | 0.0867   | -3.0611 | 0.0001619 | 0.0101469 | BHLH93       |
| LOC_Os01g40260 | 40.1067  | 8.1300   | -2.3025 | 0.0001619 | 0.0101469 | WRKY50       |
| LOC_Os10g20350 | 10.7500  | 2.4667   | -2.1237 | 0.0001621 | 0.0101469 | DTXL1        |
| LOC_Os07g03170 | 13.9300  | 2.8167   | -2.3061 | 0.0001645 | 0.0102642 | -            |
| LOC_Os01g73780 | 13.7933  | 5.3600   | -1.3637 | 0.0001647 | 0.0102642 | -            |
| LOC_Os01g14630 | 8.6833   | 1.4333   | -2.5989 | 0.0001655 | 0.0102881 | GGPPS1       |
| LOC_Os07g10910 | 1.8467   | 5.5100   | 1.5771  | 0.0001701 | 0.010552  | EXO70A1      |
| LOC_Os01g11860 | 2.9733   | 0.7233   | -2.0393 | 0.0001708 | 0.0105702 | DJ1B         |

|                |          |         |          |           |           |              |
|----------------|----------|---------|----------|-----------|-----------|--------------|
| LOC_Os08g07100 | 0.8867   | 0.0567  | -3.9678  | 0.0001768 | 0.0108944 | TPS2         |
| MSTRG.22410    | 4.2767   | 0.3167  | -3.7554  | 0.0001769 | 0.0108944 | --           |
| LOC_Os09g25390 | 0.1267   | 0.0010  | -6.9849  | 0.0001788 | 0.0109863 | PLDALPHA1    |
| LOC_Os01g19840 | 61.1867  | 28.6867 | -1.0928  | 0.0001804 | 0.0110292 | RPL29A       |
| LOC_Os01g15340 | 1.2067   | 0.1100  | -3.4555  | 0.0001807 | 0.0110292 | RAA1         |
| LOC_Os02g04120 | 8.2433   | 2.9500  | -1.4825  | 0.0001807 | 0.0110292 | Os02g0134000 |
| LOC_Os04g10530 | 20.0133  | 4.8733  | -2.0380  | 0.0001817 | 0.0110651 | gatA2        |
| LOC_Os02g49660 | 1.7800   | 0.5000  | -1.8319  | 0.0001858 | 0.0112652 | TBL19        |
| LOC_Os01g09190 | 4.4933   | 0.3633  | -3.6284  | 0.0001919 | 0.0116087 | -            |
| LOC_Os08g27170 | 9.5033   | 2.0367  | -2.2222  | 0.0001936 | 0.0116882 | SARD1        |
| LOC_Os01g66710 | 0.2433   | 0.0010  | -7.9268  | 0.0001954 | 0.011177  | -            |
| LOC_Os01g71760 | 9.5733   | 1.3433  | -2.8332  | 0.0001995 | 0.0119897 | BAT1         |
| LOC_Os01g52260 | 16.6467  | 39.4100 | 1.2433   | 0.0002053 | 0.0122567 | SAT1         |
| LOC_Os05g47750 | 7.9667   | 1.4033  | -2.5051  | 0.0002066 | 0.0123041 | At1g18390    |
| LOC_Os07g47450 | 18.1633  | 4.0300  | -2.1722  | 0.000207  | 0.0123046 | Os07g0671000 |
| LOC_Os10g05490 | 2.5600   | 0.2967  | -3.1092  | 0.0002088 | 0.0123809 | CYP76C2      |
| LOC_Os03g46910 | 0.8300   | 0.2133  | -1.9600  | 0.0002095 | 0.0123968 | -            |
| LOC_Os05g39580 | 1.4733   | 0.1067  | -3.7879  | 0.0002102 | 0.0124129 | PYL5         |
| LOC_Os08g03330 | 0.4133   | 0.0010  | -8.6912  | 0.0002109 | 0.0124188 | -            |
| LOC_Os04g25650 | 9.2067   | 1.2633  | -2.8654  | 0.0002113 | 0.0124188 | CRRSP38      |
| LOC_Os11g39310 | 10.1067  | 22.5700 | 1.1591   | 0.0002136 | 0.0124692 | RPM1         |
| LOC_Os03g10100 | 15.7400  | 5.1300  | -1.6174  | 0.000214  | 0.0124692 | PLT5         |
| LOC_Os01g14590 | 36.9767  | 5.4800  | -2.7544  | 0.0002177 | 0.012659  | -            |
| LOC_Os07g10850 | 0.0667   | 0.0010  | -6.0589  | 0.0002192 | 0.0127196 | -            |
| LOC_Os04g47150 | 0.1700   | 0.0067  | -4.6724  | 0.0002223 | 0.0128723 | SBT1.2       |
| LOC_Os01g68269 | 51.7100  | 19.8767 | -1.3794  | 0.0002246 | 0.0129762 | -            |
| LOC_Os01g74110 | 15.0667  | 31.4867 | 1.0634   | 0.0002282 | 0.0131289 | ZIP1         |
| LOC_Os07g14740 | 64.2267  | 18.7200 | -1.7786  | 0.0002289 | 0.0131403 | -            |
| LOC_Os11g44340 | 0.8233   | 0.1300  | -2.6630  | 0.0002294 | 0.0131403 | CBP60A       |
| LOC_Os04g44320 | 9.9800   | 2.0767  | -2.2648  | 0.0002306 | 0.013185  | YSL12        |
| LOC_Os02g13580 | 0.1567   | 0.7233  | 2.2070   | 0.0002321 | 0.0132429 | KP1          |
| LOC_Os05g46370 | 0.4700   | 2.2000  | 2.2268   | 0.0002337 | 0.0133023 | BHLH87       |
| LOC_Os05g01370 | 2.7500   | 0.2600  | -3.4028  | 0.0002362 | 0.0134187 | PGIP         |
| LOC_Os03g06670 | 2.5900   | 0.5933  | -2.1260  | 0.0002429 | 0.0137708 | Os03g0162200 |
| LOC_Os02g50740 | 1.5833   | 0.3867  | -2.0338  | 0.0002438 | 0.0137921 | alr3466      |
| LOC_Os01g47690 | 19.6467  | 43.5067 | 1.1470   | 0.0002463 | 0.0139047 | GLY3         |
| LOC_Os03g61500 | 1.0500   | 0.0010  | -10.0362 | 0.0002477 | 0.0139554 | CNR10        |
| LOC_Os04g38790 | 16.2033  | 5.6633  | -1.5166  | 0.0002489 | 0.0139909 | -            |
| LOC_Os02g58554 | 12.9000  | 47.9367 | 1.8938   | 0.0002513 | 0.0140722 | -            |
| LOC_Os04g42130 | 1.0700   | 2.5533  | 1.2548   | 0.0002521 | 0.0140766 | At5g25050    |
| LOC_Os01g70490 | 14.7667  | 2.6733  | -2.4656  | 0.0002535 | 0.0141027 | HAK5         |
| LOC_Os10g36100 | 0.5967   | 0.0010  | -9.2208  | 0.0002551 | 0.0141665 | LTP-2        |
| LOC_Os06g39110 | 166.6200 | 44.7967 | -1.8951  | 0.0002587 | 0.0143378 | -            |



|                |         |          |         |           |           |              |
|----------------|---------|----------|---------|-----------|-----------|--------------|
| LOC_Os07g47210 | 1.6333  | 3.8967   | 1.2544  | 0.0002688 | 0.014808  | At2g23540    |
| LOC_Os09g25810 | 2.2967  | 0.7100   | -1.6937 | 0.0002689 | 0.014808  | At4g30420    |
| LOC_Os05g11414 | 0.1233  | 0.7433   | 2.5914  | 0.0002725 | 0.0149648 | MADS58       |
| LOC_Os01g16980 | 10.3067 | 3.4800   | -1.5664 | 0.0002728 | 0.0149648 | -            |
| LOC_Os01g48640 | 7.5467  | 3.3600   | -1.1674 | 0.000276  | 0.0150764 | -            |
| MSTRG.3380     | 4.0767  | 2.0367   | -1.0012 | 0.0002767 | 0.0150831 | --           |
| LOC_Os01g24490 | 1.9100  | 0.6833   | -1.4829 | 0.000278  | 0.0151259 | -            |
| LOC_Os05g05040 | 28.7833 | 5.6367   | -2.3523 | 0.000279  | 0.0151509 | -            |
| LOC_Os06g09350 | 2.5833  | 6.2333   | 1.2708  | 0.0002817 | 0.0152652 | -            |
| LOC_Os11g02540 | 19.3400 | 3.0733   | -2.6537 | 0.0002852 | 0.0154232 | WRKY70       |
| LOC_Os10g04270 | 20.5667 | 4.7733   | -2.1072 | 0.0002882 | 0.0155559 | GOS9         |
| LOC_Os01g72680 | 0.1500  | 0.0010   | -7.2288 | 0.0002892 | 0.0155647 | RPS5         |
| LOC_Os02g43290 | 1.1967  | 0.3400   | -1.8154 | 0.0002895 | 0.0155647 | At4g10390    |
| LOC_Os09g28650 | 62.8367 | 11.7667  | -2.4169 | 0.0002916 | 0.0156476 | TCEA-B1      |
| LOC_Os04g09260 | 4.3067  | 0.4133   | -3.3812 | 0.0002967 | 0.0158793 | AMAT         |
| LOC_Os09g34150 | 5.3933  | 1.8133   | -1.5725 | 0.0002971 | 0.0158793 | RPM1         |
| LOC_Os09g23430 | 4.9700  | 0.1533   | -5.0185 | 0.0002991 | 0.0159243 | -            |
| LOC_Os07g12780 | 62.4700 | 148.7967 | 1.2521  | 0.000302  | 0.0160463 | CYCP4-1      |
| LOC_Os09g38350 | 0.6167  | 0.0300   | -4.3615 | 0.0003049 | 0.0161537 | AAE11        |
| LOC_Os09g08130 | 85.6433 | 9.7533   | -3.1344 | 0.0003052 | 0.0161537 | At2g04400    |
| LOC_Os08g36630 | 5.3900  | 1.2133   | -2.1513 | 0.0003079 | 0.0162637 | ACA7         |
| LOC_Os04g33210 | 9.7967  | 22.7033  | 1.2125  | 0.0003092 | 0.0162991 | CLPD2        |
| LOC_Os03g47016 | 2.7100  | 0.4500   | -2.5903 | 0.0003121 | 0.0164192 | OSH10        |
| LOC_Os12g01400 | 0.5533  | 0.0010   | -9.1120 | 0.000315  | 0.0165113 | CML25        |
| LOC_Os08g07830 | 41.0933 | 19.5100  | -1.0747 | 0.0003151 | 0.0165113 | IST1         |
| LOC_Os03g07810 | 0.1833  | 0.0010   | -7.5183 | 0.0003157 | 0.0165119 | -            |
| LOC_Os05g37470 | 9.2700  | 3.7767   | -1.2955 | 0.0003169 | 0.0165317 | Os05g0447200 |
| LOC_Os06g37224 | 0.3467  | 0.0200   | -4.1155 | 0.0003173 | 0.0165317 | CYP701A9     |
| LOC_Os11g18194 | 2.0167  | 5.7867   | 1.5208  | 0.0003205 | 0.016636  | Os11g0285000 |
| LOC_Os09g14610 | 58.9133 | 16.6267  | -1.8251 | 0.0003268 | 0.0169257 | DCL2B        |
| LOC_Os05g39860 | 0.3800  | 0.0167   | -4.5110 | 0.0003273 | 0.0169257 | -            |
| LOC_Os09g29520 | 12.5133 | 3.5433   | -1.8203 | 0.0003288 | 0.0169683 | WAK3         |
| LOC_Os12g32850 | 2.3933  | 0.3067   | -2.9643 | 0.0003294 | 0.0169692 | CYP71E1      |
| LOC_Os01g29330 | 33.4500 | 5.9633   | -2.4878 | 0.0003315 | 0.0170417 | -            |
| LOC_Os03g18770 | 80.6033 | 30.4600  | -1.4039 | 0.0003346 | 0.0171704 | WUN1         |
| LOC_Os10g36703 | 49.7667 | 9.8333   | -2.3394 | 0.0003371 | 0.0172308 | SAUR32       |
| LOC_Os09g02300 | 1.5867  | 0.5467   | -1.5373 | 0.0003382 | 0.0172335 | -            |
| LOC_Os09g30454 | 4.1500  | 1.3833   | -1.5850 | 0.0003384 | 0.0172335 | WAK3         |
| LOC_Os07g10050 | 0.8233  | 4.9300   | 2.5820  | 0.0003411 | 0.0173372 | TY3B-I       |
| LOC_Os05g38860 | 13.2800 | 3.4433   | -1.9474 | 0.0003444 | 0.0174427 | -            |
| LOC_Os12g41570 | 2.5867  | 0.4400   | -2.5555 | 0.0003513 | 0.0176468 | WAKL14       |
| LOC_Os09g27500 | 3.5667  | 0.4267   | -3.0634 | 0.0003522 | 0.0176468 | CYP76M5      |
| LOC_Os01g03549 | 10.7533 | 4.4600   | -1.2697 | 0.0003531 | 0.0176468 | LPR1         |

|                |          |          |         |           |           |              |
|----------------|----------|----------|---------|-----------|-----------|--------------|
| MSTRG.26610    | 4.5267   | 1.4533   | -1.6391 | 0.0003536 | 0.0176468 | --           |
| LOC_Os05g36140 | 3.1067   | 0.7833   | -1.9877 | 0.0003542 | 0.0176468 | -            |
| LOC_Os04g43550 | 9.1233   | 3.4200   | -1.4156 | 0.0003548 | 0.0176468 | Dctpp1       |
| LOC_Os04g30260 | 0.2300   | 0.0010   | -7.8455 | 0.0003549 | 0.0176468 | WAK2         |
| LOC_Os06g10580 | 22.3133  | 9.2600   | -1.2688 | 0.000355  | 0.0176468 | CNGC20       |
| LOC_Os07g31720 | 108.5300 | 32.3333  | -1.7470 | 0.0003584 | 0.017781  | CAR9         |
| LOC_Os05g35930 | 5.6233   | 1.4500   | -1.9554 | 0.0003612 | 0.0178886 | -            |
| LOC_Os12g43820 | 6.2900   | 2.4000   | -1.3900 | 0.0003624 | 0.0179145 | -            |
| LOC_Os03g43990 | 4.3200   | 13.2633  | 1.6183  | 0.0003636 | 0.0179411 | At1g30440    |
| LOC_Os06g21950 | 0.0010   | 0.1600   | 7.3219  | 0.0003677 | 0.0181128 | PHT1-10      |
| LOC_Os07g34260 | 66.9467  | 6.5833   | -3.3461 | 0.0003697 | 0.0181743 | Os07g0271500 |
| LOC_Os10g34440 | 5.2267   | 1.2933   | -2.0148 | 0.0003705 | 0.0181743 | -            |
| LOC_Os09g15050 | 1.9167   | 0.1800   | -3.4125 | 0.000371  | 0.0181743 | CPS4         |
| LOC_Os03g20440 | 6.7967   | 1.1667   | -2.5424 | 0.0003739 | 0.0182819 | CAMBP25      |
| LOC_Os04g39300 | 39.2800  | 5.1667   | -2.9265 | 0.0003765 | 0.0183034 | -            |
| LOC_Os08g04350 | 3.0467   | 0.2433   | -3.6462 | 0.0003766 | 0.0183034 | -            |
| LOC_Os01g55020 | 6.3333   | 2.2567   | -1.4888 | 0.000377  | 0.0183034 | NFD6         |
| LOC_Os01g39020 | 2.4467   | 8.7167   | 1.8330  | 0.0003803 | 0.0184296 | HSFA6B       |
| LOC_Os06g38340 | 9.4233   | 2.7533   | -1.7751 | 0.0003819 | 0.0184604 | At3g47570    |
| LOC_Os11g37960 | 11.2900  | 2.2467   | -2.3292 | 0.0003823 | 0.0184604 | PR4A         |
| LOC_Os02g42150 | 14.1433  | 2.1933   | -2.6889 | 0.0003855 | 0.0185504 | WAK5         |
| LOC_Os09g22000 | 2.8900   | 6.7133   | 1.2160  | 0.0003862 | 0.0185505 | yidA         |
| LOC_Os11g11970 | 56.6733  | 11.5467  | -2.2952 | 0.0003939 | 0.0188883 | -            |
| LOC_Os03g61540 | 14.7467  | 29.6400  | 1.0072  | 0.0003993 | 0.0190615 | -            |
| LOC_Os04g29580 | 1.1233   | 0.1667   | -2.7527 | 0.0004004 | 0.0190615 | WAK2         |
| LOC_Os11g30760 | 39.9733  | 9.5600   | -2.0640 | 0.0004106 | 0.0195148 | -            |
| LOC_Os05g10370 | 10.6400  | 4.2967   | -1.3082 | 0.0004133 | 0.0196089 | APS1         |
| LOC_Os01g72130 | 16.9167  | 4.8800   | -1.7935 | 0.0004176 | 0.0197057 | -            |
| LOC_Os07g42160 | 8.3933   | 3.5733   | -1.2320 | 0.0004176 | 0.0197057 | RSH3         |
| LOC_Os02g36000 | 5.9100   | 1.3133   | -2.1699 | 0.0004188 | 0.0197057 | -            |
| LOC_Os06g37410 | 2.7033   | 0.3200   | -3.0786 | 0.0004196 | 0.0197057 | BHLH         |
| LOC_Os05g11320 | 5.2600   | 0.6333   | -3.0540 | 0.0004197 | 0.0197057 | MT3B         |
| LOC_Os05g48010 | 25.8333  | 7.3733   | -1.8088 | 0.0004231 | 0.0198282 | RAX3         |
| LOC_Os08g37930 | 13.7500  | 3.4800   | -1.9823 | 0.0004251 | 0.01989   | CjBAp12      |
| LOC_Os06g50920 | 3.0400   | 6.3933   | 1.0725  | 0.000427  | 0.0199423 | HT1          |
| LOC_Os07g09800 | 85.4467  | 210.4767 | 1.3006  | 0.0004282 | 0.0199664 | ndhS         |
| MSTRG.7332     | 1.2367   | 0.1933   | -2.6773 | 0.0004311 | 0.0200639 | WAK4         |
| LOC_Os11g35450 | 1.0633   | 0.1200   | -3.1475 | 0.0004325 | 0.0200928 | GSO2         |
| LOC_Os10g39680 | 160.0433 | 50.7700  | -1.6564 | 0.0004332 | 0.0200928 | Cht8         |
| LOC_Os09g25720 | 1.4767   | 0.1167   | -3.6619 | 0.0004351 | 0.0201465 | -            |
| LOC_Os05g30500 | 47.6833  | 10.4433  | -2.1909 | 0.0004397 | 0.0202919 | -            |
| LOC_Os02g56014 | 76.1633  | 35.2567  | -1.1112 | 0.0004397 | 0.0202919 | RPS30A       |
| LOC_Os11g23080 | 1.8733   | 0.5333   | -1.8125 | 0.0004409 | 0.0203121 | -            |

|                     |          |          |         |           |           |              |
|---------------------|----------|----------|---------|-----------|-----------|--------------|
| LOC_Os04g55710      | 229.4100 | 77.9100  | -1.5580 | 0.0004432 | 0.0203484 | At3g16150    |
| LOC_Os04g28250      | 4.3567   | 0.5300   | -3.0392 | 0.0004434 | 0.0203484 | Os04g0350100 |
| MSTRG.17789         | 0.3667   | 1.4633   | 1.9967  | 0.000444  | 0.0203484 | --           |
| LOC_Os03g40670      | 8.3500   | 2.6867   | -1.6360 | 0.000448  | 0.0204971 | GDPD6        |
| LOC_Os05g11910      | 27.5367  | 68.1067  | 1.3064  | 0.0004494 | 0.0205278 | At5g45910    |
| LOC_Os02g17600      | 0.9333   | 0.0633   | -3.8814 | 0.000457  | 0.0208141 | FT1          |
| LOC_Os04g15630      | 0.1700   | 0.0010   | -7.4094 | 0.0004578 | 0.0208141 | At3g47570    |
| LOC_Os12g25660      | 3.1967   | 0.2800   | -3.5131 | 0.000458  | 0.0208141 | CYP94B3      |
| LOC_Os11g39320      | 2.1733   | 4.5567   | 1.0681  | 0.0004637 | 0.0210041 | RPM1         |
| LOC_Os01g12210      | 3.1700   | 0.6233   | -2.3464 | 0.000465  | 0.0210267 | ALMT9        |
| LOC_Os12g38770      | 0.6200   | 0.0333   | -4.2172 | 0.0004688 | 0.0211624 | PAP1         |
| LOC_Os02g02120      | 19.2733  | 4.8800   | -1.9817 | 0.0004696 | 0.0211628 | WAK5         |
| LOC_Os01g55610      | 0.7167   | 0.1700   | -2.0758 | 0.000484  | 0.0217422 | NPF1.2       |
| LOC_Os04g15690      | 82.4667  | 23.5100  | -1.8105 | 0.0004898 | 0.0219661 | -            |
| LOC_Os02g36110      | 8.3467   | 0.6867   | -3.6035 | 0.0004927 | 0.0220603 | CYP76M7      |
| LOC_Os05g05080      | 3.0333   | 0.5400   | -2.4899 | 0.0004937 | 0.0220682 | -            |
| LOC_Os05g33160      | 0.3967   | 0.0133   | -4.8948 | 0.0004996 | 0.022259  | At1g27190    |
| LOC_Os05g48340      | 27.9433  | 60.0100  | 1.1027  | 0.0005064 | 0.0224856 | -            |
| LOC_Os01g31870      | 30.1633  | 61.3433  | 1.0241  | 0.0005198 | 0.0229685 | NRAMP4       |
| LOC_Os02g56370      | 5.8333   | 1.2133   | -2.2653 | 0.0005241 | 0.0231201 | WAK5         |
| LOC_Os04g30240      | 26.7000  | 6.9033   | -1.9515 | 0.000528  | 0.0231844 | WAK2         |
| MSTRG.14495         | 2.5233   | 0.8700   | -1.5362 | 0.0005281 | 0.0231844 | --           |
| LOC_Os08g09610      | 10.3333  | 3.7133   | -1.4765 | 0.0005296 | 0.0232116 | -            |
| LOC_Os03g47610      | 223.9567 | 513.7200 | 1.1978  | 0.0005331 | 0.023328  | THIC         |
| LOC_Os12g32590      | 0.7433   | 2.0067   | 1.4327  | 0.000541  | 0.0236355 | RPM1         |
| LOC_Os04g32480      | 14.0967  | 2.1500   | -2.7129 | 0.0005433 | 0.0236925 | TIFY9        |
| LOC_Os04g47810      | 2.3333   | 0.5833   | -2.0000 | 0.0005441 | 0.0236925 | BHLH111      |
| LOC_Os11g42930      | 0.4967   | 0.1000   | -2.3123 | 0.0005465 | 0.023761  | -            |
| LOC_Os12g06060      | 1.5733   | 0.5167   | -1.6065 | 0.0005539 | 0.0240253 | CAT6         |
| LOC_Os02g50450      | 1.6667   | 0.2900   | -2.5228 | 0.000555  | 0.0240253 | -            |
| LOC_Os06g05284      | 0.4900   | 0.0500   | -3.2928 | 0.0005553 | 0.0240253 | -            |
| LOC_Os01g49614      | 12.4600  | 4.6967   | -1.4076 | 0.0005563 | 0.0240299 | At1g67000    |
| LOC_Os01g16160      | 0.0010   | 0.1133   | 6.8244  | 0.000572  | 0.0246288 | -            |
| LOC_Os11g43620      | 9.1567   | 3.2200   | -1.5078 | 0.0005754 | 0.0247395 | At4g30220    |
| ChrSy.fgenes.h.gene | 0.0010   | 0.1100   | 6.7814  | 0.0005804 | 0.0249132 | -            |
| LOC_Os07g03458      | 3.0467   | 0.2267   | -3.7486 | 0.0005832 | 0.0249852 | -            |
| LOC_Os03g03790      | 11.5367  | 1.3900   | -3.0531 | 0.0005841 | 0.0249852 | AAE12        |
| LOC_Os01g50720      | 7.3133   | 1.5800   | -2.2106 | 0.0005864 | 0.0249852 | MYB2         |
| LOC_Os09g39500      | 74.6267  | 35.2100  | -1.0837 | 0.0005866 | 0.0249852 | Ub-CEP52-2   |
| LOC_Os02g46810      | 8.5733   | 3.4400   | -1.3174 | 0.0005867 | 0.0249852 | AAP4         |
| LOC_Os01g38530      | 56.9933  | 115.2467 | 1.0159  | 0.0005939 | 0.025213  | ELF3         |
| LOC_Os06g38780      | 6.3733   | 0.9933   | -2.6817 | 0.0005953 | 0.025231  | At3g47570    |
| LOC_Os06g27910      | 3.4133   | 1.3367   | -1.3525 | 0.0005976 | 0.0252887 | At3g01570    |

|                |         |         |         |           |           |              |
|----------------|---------|---------|---------|-----------|-----------|--------------|
| LOC_Os07g32060 | 5.1533  | 1.4967  | -1.7838 | 0.0006031 | 0.0254843 | RhGT1        |
| LOC_Os10g40600 | 25.2667 | 50.7800 | 1.0070  | 0.0006044 | 0.0254959 | NPF6.3       |
| LOC_Os04g30490 | 17.5400 | 4.5533  | -1.9457 | 0.000609  | 0.0255955 | DTXL1        |
| LOC_Os12g43340 | 15.8033 | 6.9433  | -1.1865 | 0.0006096 | 0.0255955 | ADF11        |
| LOC_Os02g34740 | 2.7300  | 1.2200  | -1.1620 | 0.0006211 | 0.0260408 | -            |
| LOC_Os11g04560 | 7.1067  | 1.6600  | -2.0980 | 0.0006285 | 0.0263094 | CML36        |
| LOC_Os12g01030 | 24.6800 | 7.8767  | -1.6477 | 0.0006398 | 0.0266991 | CSE          |
| LOC_Os09g10980 | 0.5967  | 0.0233  | -4.6765 | 0.000645  | 0.0268735 | WIP5         |
| LOC_Os02g51110 | 16.9567 | 6.2267  | -1.4453 | 0.0006469 | 0.0268735 | NIP2-1       |
| LOC_Os02g36780 | 1.7033  | 3.9533  | 1.2147  | 0.0006553 | 0.0271355 | -            |
| LOC_Os11g01040 | 20.4700 | 6.5667  | -1.6403 | 0.0006636 | 0.0273979 | CSE          |
| LOC_Os11g06570 | 0.2600  | 0.0233  | -3.4780 | 0.000669  | 0.0275764 | SALT         |
| LOC_Os11g12340 | 39.3133 | 6.5100  | -2.5943 | 0.0006708 | 0.0275774 | RPM1         |
| LOC_Os07g03710 | 63.1533 | 8.1400  | -2.9558 | 0.000671  | 0.0275774 | -            |
| LOC_Os07g03900 | 1.2133  | 0.0800  | -3.9228 | 0.0006856 | 0.0280093 | LECRK41      |
| LOC_Os06g33970 | 15.4500 | 3.5767  | -2.1109 | 0.0006857 | 0.0280093 | -            |
| LOC_Os08g34720 | 36.5867 | 7.7033  | -2.2478 | 0.0006948 | 0.0283379 | PGDH2        |
| LOC_Os11g44860 | 1.6967  | 0.2767  | -2.6165 | 0.000696  | 0.028344  | At1g67520    |
| LOC_Os07g03368 | 3.0700  | 0.2433  | -3.6572 | 0.000697  | 0.0283447 | -            |
| LOC_Os04g02030 | 1.0633  | 0.2800  | -1.9251 | 0.000703  | 0.0285172 | RGA2         |
| LOC_Os07g37400 | 1.5900  | 0.2500  | -2.6690 | 0.0007034 | 0.0285172 | At4g05010    |
| LOC_Os11g28470 | 0.5900  | 0.1467  | -2.0082 | 0.0007068 | 0.0286057 | -            |
| LOC_Os10g25140 | 1.6067  | 4.9367  | 1.6195  | 0.0007077 | 0.0286057 | -            |
| LOC_Os08g06170 | 3.4933  | 0.8267  | -2.0792 | 0.0007096 | 0.0286057 | BBE1         |
| LOC_Os01g44960 | 1.4033  | 4.6967  | 1.7428  | 0.0007099 | 0.0286057 | ephx3        |
| LOC_Os04g30010 | 1.5067  | 0.2833  | -2.4108 | 0.0007114 | 0.0286057 | WAK2         |
| LOC_Os06g46340 | 6.9033  | 1.0533  | -2.7123 | 0.0007162 | 0.0287066 | Os06g0675700 |
| LOC_Os07g46920 | 3.3667  | 0.5767  | -2.5455 | 0.0007212 | 0.0287169 | -            |
| LOC_Os06g06850 | 0.8900  | 2.9900  | 1.7483  | 0.0007216 | 0.0287169 | RPP13        |
| LOC_Os11g02520 | 7.9700  | 1.4733  | -2.4355 | 0.0007221 | 0.0287169 | WRKY46       |
| MSTRG.23570    | 6.4133  | 2.1167  | -1.5993 | 0.0007331 | 0.0290676 | --           |
| LOC_Os05g50340 | 12.0133 | 1.3967  | -3.1046 | 0.000735  | 0.0290992 | RL6          |
| LOC_Os02g52910 | 0.4067  | 0.0600  | -2.7608 | 0.0007388 | 0.0291919 | -            |
| LOC_Os11g08750 | 0.5100  | 1.5967  | 1.6465  | 0.0007395 | 0.0291919 | PECS-2.1     |
| LOC_Os11g10120 | 7.9167  | 3.7100  | -1.0935 | 0.0007471 | 0.0294063 | RGA2         |
| LOC_Os01g29070 | 0.0010  | 0.2200  | 7.7814  | 0.0007513 | 0.0295285 | -            |
| LOC_Os01g48610 | 14.2167 | 4.1900  | -1.7626 | 0.0007552 | 0.0296391 | -            |
| LOC_Os01g71710 | 6.5833  | 2.2233  | -1.5661 | 0.0007731 | 0.0302549 | BAT1         |
| LOC_Os03g06700 | 0.1833  | 0.0010  | -7.5183 | 0.000777  | 0.0303642 | KCS11        |
| LOC_Os12g33140 | 1.2467  | 0.1233  | -3.3374 | 0.0007917 | 0.0308386 | -            |
| LOC_Os11g11960 | 55.0600 | 12.6200 | -2.1253 | 0.0008053 | 0.031213  | RPM1         |
| LOC_Os07g33700 | 0.5733  | 0.0800  | -2.8413 | 0.0008057 | 0.031213  | At1g48120    |
| LOC_Os01g19610 | 5.7333  | 2.2267  | -1.3645 | 0.0008083 | 0.0312584 | At3g47200    |

|                |         |         |         |           |           |              |
|----------------|---------|---------|---------|-----------|-----------|--------------|
| LOC_Os06g41980 | 2.9000  | 0.5900  | -2.2973 | 0.0008091 | 0.0312584 | LYK5         |
| LOC_Os04g39360 | 3.8867  | 0.3433  | -3.5009 | 0.0008141 | 0.0314041 | -            |
| LOC_Os03g11600 | 1.0600  | 0.1700  | -2.6405 | 0.0008181 | 0.0314698 | DL           |
| LOC_Os02g17710 | 3.3667  | 0.9700  | -1.7953 | 0.0008225 | 0.0315025 | At1g35710    |
| LOC_Os03g45450 | 39.4567 | 10.4667 | -1.9145 | 0.0008316 | 0.0318089 | WRKY71       |
| LOC_Os06g38830 | 6.0800  | 1.2967  | -2.2293 | 0.0008344 | 0.0318692 | At3g47570    |
| LOC_Os12g39120 | 4.0567  | 1.3867  | -1.5487 | 0.0008431 | 0.0321577 | Os12g0580900 |
| LOC_Os07g42610 | 2.1900  | 5.5633  | 1.3450  | 0.0008523 | 0.0324169 | ATL3         |
| LOC_Os07g30600 | 7.0233  | 0.1333  | -5.7190 | 0.0008586 | 0.0325701 | FAR1         |
| LOC_Os10g03570 | 3.4000  | 1.1300  | -1.5892 | 0.0008735 | 0.0330377 | RPM1         |
| LOC_Os07g25460 | 43.0267 | 93.8833 | 1.1256  | 0.0008763 | 0.0330962 | Ankrd13b     |
| LOC_Os12g37560 | 4.7467  | 1.4067  | -1.7546 | 0.0008799 | 0.0331847 | PLC6         |
| LOC_Os07g03600 | 1.6500  | 0.1133  | -3.8638 | 0.0008812 | 0.033188  | -            |
| LOC_Os11g01390 | 0.6700  | 0.0010  | -9.3880 | 0.0008991 | 0.0337754 | CML25        |
| LOC_Os11g45400 | 2.2333  | 0.7567  | -1.5615 | 0.0009041 | 0.0339106 | GPAT3        |
| LOC_Os05g35690 | 1.6000  | 0.2700  | -2.5670 | 0.0009055 | 0.0339143 | SN2          |
| LOC_Os01g06140 | 0.1833  | 0.0010  | -7.5183 | 0.0009099 | 0.0340308 | -            |
| LOC_Os07g45074 | 2.6000  | 14.6600 | 2.4953  | 0.0009111 | 0.0340308 | TRA1         |
| LOC_Os02g27310 | 14.5500 | 4.5667  | -1.6718 | 0.0009171 | 0.0341584 | CRK41        |
| LOC_Os07g23430 | 1.0433  | 0.1267  | -3.0421 | 0.0009289 | 0.03446   | FAD2-2       |
| LOC_Os08g04370 | 0.8500  | 0.0200  | -5.4094 | 0.000929  | 0.03446   | -            |
| LOC_Os02g34800 | 0.5500  | 0.0010  | -9.1033 | 0.0009345 | 0.0346178 | At4g08850    |
| LOC_Os03g46424 | 11.0167 | 22.1400 | 1.0070  | 0.0009413 | 0.0347699 | -            |
| LOC_Os06g45970 | 0.7867  | 0.0010  | -9.6196 | 0.0009437 | 0.0347699 | SAUR71       |
| LOC_Os10g28080 | 74.7967 | 22.6000 | -1.7267 | 0.0009438 | 0.0347699 | -            |
| LOC_Os11g34880 | 1.3200  | 0.6067  | -1.1216 | 0.0009456 | 0.0347903 | RPM1         |
| LOC_Os11g29720 | 5.4867  | 1.5067  | -1.8646 | 0.00095   | 0.0348581 | CYP78A5      |
| LOC_Os03g43770 | 2.9900  | 0.8000  | -1.9021 | 0.0009523 | 0.034893  | At3g48880    |
| LOC_Os06g04070 | 62.5467 | 23.8233 | -1.3926 | 0.0009541 | 0.0349116 | ADC1         |
| LOC_Os06g10920 | 0.3067  | 0.0067  | -5.5236 | 0.000956  | 0.0349343 | FT1          |
| LOC_Os01g13560 | 0.3400  | 1.5300  | 2.1699  | 0.0009592 | 0.0350056 | Os01g0237000 |
| LOC_Os01g70860 | 0.9267  | 0.1700  | -2.4465 | 0.0009627 | 0.035087  | PIR7A        |
| LOC_Os01g56240 | 13.7767 | 3.1067  | -2.1488 | 0.0009749 | 0.0353793 | SAUR41       |
| LOC_Os11g14480 | 0.9933  | 0.0733  | -3.7597 | 0.000976  | 0.0353793 | ASB11        |
| LOC_Os01g51020 | 4.4200  | 1.6900  | -1.3870 | 0.0009774 | 0.0353837 | RPL28A       |
| LOC_Os06g03180 | 1.7733  | 0.4133  | -2.1011 | 0.0009807 | 0.035456  | -            |
| LOC_Os09g39060 | 3.4033  | 1.2333  | -1.4644 | 0.0009884 | 0.0356484 | SEN102       |
| LOC_Os05g41370 | 2.1367  | 0.4400  | -2.2798 | 0.0009887 | 0.0356484 | CRK25        |
| LOC_Os02g33670 | 1.6267  | 0.3033  | -2.4229 | 0.0009936 | 0.035767  | -            |
| LOC_Os07g01410 | 0.1933  | 1.3733  | 2.8285  | 0.0009968 | 0.0357988 | PRX74        |
| LOC_Os07g35630 | 0.6867  | 0.0833  | -3.0426 | 0.0010009 | 0.035897  | CRK21        |
| LOC_Os03g03730 | 20.6133 | 9.0500  | -1.1876 | 0.0010055 | 0.0360042 | agtA         |
| LOC_Os10g37920 | 0.6667  | 0.0100  | -6.0589 | 0.0010066 | 0.0360042 | DTXL2        |

|                |          |          |         |           |           |           |
|----------------|----------|----------|---------|-----------|-----------|-----------|
| LOC_Os05g24660 | 3.8500   | 0.2633   | -3.8699 | 0.0010091 | 0.0360487 | IPT3      |
| LOC_Os10g37680 | 1.5767   | 0.5300   | -1.5728 | 0.001016  | 0.0361313 | -         |
| LOC_Os06g49760 | 2.8133   | 0.4367   | -2.6877 | 0.0010164 | 0.0361313 | -         |
| MSTRG.4545     | 4.3333   | 1.1000   | -1.9780 | 0.0010174 | 0.0361313 | --        |
| LOC_Os06g37150 | 7.3767   | 1.8300   | -2.0111 | 0.0010181 | 0.0361313 | -         |
| LOC_Os01g45470 | 351.4367 | 117.4233 | -1.5815 | 0.0010264 | 0.0363787 | -         |
| LOC_Os12g05080 | 2.5933   | 0.8700   | -1.5757 | 0.0010316 | 0.0365142 | TBL11     |
| LOC_Os03g58820 | 6.9933   | 14.4467  | 1.0467  | 0.0010424 | 0.0367061 | -         |
| LOC_Os06g36380 | 6.3433   | 17.4800  | 1.4624  | 0.0010441 | 0.0367061 | -         |
| LOC_Os09g35780 | 0.9600   | 0.0833   | -3.5261 | 0.0010446 | 0.0367061 | BAP2      |
| LOC_Os01g26300 | 0.6867   | 0.0900   | -2.9316 | 0.0010457 | 0.0367061 | WAK5      |
| LOC_Os07g24000 | 0.0233   | 0.6100   | 4.7083  | 0.0010462 | 0.0367061 | -         |
| LOC_Os02g07830 | 3.0467   | 1.1800   | -1.3684 | 0.0010474 | 0.0367061 | HKT6      |
| LOC_Os01g66680 | 1.1600   | 3.0700   | 1.4041  | 0.0010479 | 0.0367061 | At2g19130 |
| LOC_Os06g50950 | 12.9200  | 3.5733   | -1.8543 | 0.0010517 | 0.0367934 | At5g55050 |
| LOC_Os03g27590 | 8.5200   | 3.1200   | -1.4493 | 0.001057  | 0.0369284 | SCPL51    |
| LOC_Os03g50220 | 1.3300   | 0.4067   | -1.7095 | 0.0010664 | 0.0372088 | HOP2      |
| LOC_Os08g16790 | 4.1600   | 1.9867   | -1.0662 | 0.0010681 | 0.0372204 | MYOB7     |
| LOC_Os03g11890 | 14.8000  | 30.8533  | 1.0598  | 0.0010728 | 0.0373361 | OBE4      |
| LOC_Os07g27670 | 7.1533   | 2.5300   | -1.4995 | 0.0010757 | 0.037388  | WRKY41    |
| LOC_Os10g23900 | 0.2067   | 0.0010   | -7.6912 | 0.0010773 | 0.0373987 | TYDC2     |
| LOC_Os01g16714 | 4.2333   | 0.8667   | -2.2882 | 0.0010898 | 0.0377829 | YUC10     |
| LOC_Os12g39360 | 55.7300  | 19.7000  | -1.5003 | 0.0010931 | 0.0377947 | nep1      |
| LOC_Os08g44220 | 1.4867   | 0.1367   | -3.4433 | 0.0010954 | 0.0377947 | At4g39670 |
| LOC_Os04g47360 | 1.0533   | 0.2433   | -2.1140 | 0.0010959 | 0.0377947 | Prep      |
| LOC_Os10g34920 | 5.0267   | 1.5567   | -1.6911 | 0.0010971 | 0.0377947 | -         |
| LOC_Os08g42910 | 32.9133  | 11.9433  | -1.4625 | 0.0010971 | 0.0377947 | MAP2A     |
| LOC_Os04g49950 | 1.4400   | 0.2867   | -2.3286 | 0.0011036 | 0.0379698 | At2g43260 |
| LOC_Os06g05450 | 20.3000  | 9.4167   | -1.1082 | 0.00111   | 0.0381413 | -         |
| LOC_Os06g47470 | 5.4933   | 2.0833   | -1.3988 | 0.0011274 | 0.0386899 | CRK5      |
| LOC_Os01g06790 | 2.5800   | 1.0600   | -1.2833 | 0.0011299 | 0.0387257 | RLP12     |
| LOC_Os07g46060 | 2.9600   | 0.9533   | -1.6345 | 0.0011433 | 0.0391121 | -         |
| LOC_Os10g04490 | 2.5833   | 0.6167   | -2.0667 | 0.0011441 | 0.0391121 | RGA2      |
| LOC_Os06g51070 | 40.9067  | 16.0000  | -1.3543 | 0.0011518 | 0.039326  | NAC68     |
| LOC_Os03g55010 | 22.8867  | 8.4367   | -1.4398 | 0.0011533 | 0.0393286 | UGT83A1   |
| LOC_Os06g49970 | 1.5300   | 3.3933   | 1.1492  | 0.0011576 | 0.0393927 | AMY2A     |
| LOC_Os05g35050 | 0.0010   | 0.3000   | 8.2288  | 0.0011629 | 0.0395065 | COPT2     |
| LOC_Os04g41870 | 20.9367  | 10.1167  | -1.0493 | 0.0011651 | 0.0395324 | -         |
| LOC_Os02g42710 | 0.8567   | 0.1800   | -2.2507 | 0.0011737 | 0.0397736 | ERG3      |
| LOC_Os04g30110 | 6.8567   | 1.0633   | -2.6889 | 0.0011771 | 0.0398399 | WAK2      |
| LOC_Os08g26520 | 0.9733   | 0.1567   | -2.6352 | 0.0011801 | 0.0398645 | -         |
| LOC_Os05g05510 | 0.6133   | 0.0633   | -3.2756 | 0.0011808 | 0.0398645 | -         |
| LOC_Os09g08990 | 0.4567   | 0.0867   | -2.3976 | 0.0011916 | 0.0401275 | CYP75B1   |

|                |          |         |         |           |           |              |
|----------------|----------|---------|---------|-----------|-----------|--------------|
| LOC_Os06g34960 | 2.5800   | 0.6100  | -2.0805 | 0.0011999 | 0.0402577 | At1g67520    |
| LOC_Os01g41820 | 12.8433  | 5.0133  | -1.3572 | 0.0012002 | 0.0402577 | CYP72A15     |
| LOC_Os04g09840 | 0.5767   | 1.6167  | 1.4872  | 0.0012014 | 0.0402577 | TY3B-I       |
| LOC_Os03g36130 | 0.1967   | 1.2200  | 2.6331  | 0.0012105 | 0.0405139 | -            |
| LOC_Os01g71350 | 33.2467  | 9.5033  | -1.8067 | 0.0012207 | 0.0407262 | -            |
| LOC_Os12g36860 | 6.9867   | 0.9867  | -2.8240 | 0.0012214 | 0.0407262 | BETV1G       |
| LOC_Os01g71340 | 118.9300 | 34.8067 | -1.7727 | 0.0012274 | 0.0408686 | -            |
| LOC_Os04g55980 | 2.7367   | 0.1033  | -4.7270 | 0.0012301 | 0.0408686 | -            |
| LOC_Os02g43690 | 23.8967  | 10.5533 | -1.1791 | 0.001233  | 0.0409117 | YPTM2        |
| LOC_Os05g05680 | 91.7567  | 24.8633 | -1.8838 | 0.0012357 | 0.04095   | MAO1B        |
| LOC_Os03g25450 | 4.5100   | 2.1167  | -1.0913 | 0.0012447 | 0.0411986 | CBF5         |
| LOC_Os01g36294 | 10.4167  | 3.1700  | -1.7163 | 0.0012473 | 0.0411987 | CYP71C1      |
| LOC_Os12g17430 | 2.4667   | 0.3300  | -2.9020 | 0.0012484 | 0.0411987 | RPM1         |
| LOC_Os03g21730 | 0.1133   | 0.3800  | 1.7454  | 0.0012508 | 0.0411987 | IRK          |
| LOC_Os06g37080 | 4.7933   | 1.5333  | -1.6444 | 0.001252  | 0.0411987 | -            |
| LOC_Os01g12680 | 0.4300   | 0.0667  | -2.6893 | 0.0012523 | 0.0411987 | SLAH3        |
| LOC_Os05g13620 | 1.4667   | 0.2633  | -2.4776 | 0.0012689 | 0.0416901 | -            |
| LOC_Os01g20980 | 0.8433   | 0.0467  | -4.1756 | 0.0012703 | 0.0416901 | PME41        |
| LOC_Os02g37280 | 10.6033  | 2.7733  | -1.9348 | 0.0013039 | 0.0426096 | -            |
| MSTRG.17201    | 7.5467   | 21.0967 | 1.4831  | 0.0013044 | 0.0426096 | --           |
| LOC_Os07g05420 | 3.6167   | 0.7100  | -2.3488 | 0.0013306 | 0.0432997 | BZ1          |
| MSTRG.9462     | 0.6600   | 0.0010  | -9.3663 | 0.0013448 | 0.0435536 | --           |
| LOC_Os04g54200 | 18.7100  | 5.0233  | -1.8971 | 0.0013532 | 0.0437196 | DGK5         |
| LOC_Os12g08850 | 0.2833   | 0.0233  | -3.6020 | 0.0013608 | 0.0439129 | csd          |
| LOC_Os08g31340 | 1.1000   | 0.3533  | -1.6384 | 0.0013646 | 0.0439828 | CCH          |
| LOC_Os01g58240 | 27.5933  | 5.7967  | -2.2510 | 0.001381  | 0.0444279 | SBT3.5       |
| LOC_Os03g36140 | 0.0010   | 0.2267  | 7.8244  | 0.0013817 | 0.0444279 | -            |
| LOC_Os05g49810 | 1.8433   | 0.5233  | -1.8165 | 0.0013978 | 0.0448406 | -            |
| LOC_Os06g50930 | 16.4233  | 35.1500 | 1.0978  | 0.0014063 | 0.0450578 | STR15        |
| LOC_Os03g05530 | 17.3933  | 3.8767  | -2.1656 | 0.0014151 | 0.0452874 | At2g39510    |
| LOC_Os07g25810 | 0.9467   | 2.6567  | 1.4887  | 0.0014295 | 0.0456484 | Sbsn         |
| LOC_Os01g49150 | 0.4000   | 0.0967  | -2.0489 | 0.0014367 | 0.045763  | ASF1A        |
| LOC_Os06g11860 | 40.1833  | 17.2633 | -1.2189 | 0.0014379 | 0.045763  | RAP2-4       |
| LOC_Os04g34290 | 6.8267   | 3.1000  | -1.1389 | 0.0014384 | 0.045763  | At2g19130    |
| LOC_Os06g35560 | 32.7267  | 10.2867 | -1.6697 | 0.0014405 | 0.0457734 | CBDAS3       |
| LOC_Os10g26940 | 11.0467  | 63.6200 | 2.5259  | 0.0014597 | 0.0463313 | BURP16       |
| LOC_Os05g41790 | 2.3500   | 5.0867  | 1.1141  | 0.0014721 | 0.0466682 | Os05g0497500 |
| LOC_Os12g27220 | 40.8900  | 9.4833  | -2.1083 | 0.0014809 | 0.0468616 | HSR201       |
| LOC_Os07g48020 | 143.6500 | 47.7833 | -1.5880 | 0.0014831 | 0.0468616 | PRX112       |
| LOC_Os05g03934 | 24.2267  | 10.7167 | -1.1767 | 0.0014834 | 0.0468616 | -            |
| LOC_Os04g28780 | 1.4567   | 0.2467  | -2.5620 | 0.0014985 | 0.047284  | At2g19130    |
| LOC_Os08g37300 | 2.9333   | 10.1833 | 1.7956  | 0.0015016 | 0.0473251 | -            |
| LOC_Os07g13810 | 4.4033   | 8.9733  | 1.0270  | 0.0015036 | 0.0473352 | Bx8          |

|                |         |         |         |           |           |              |
|----------------|---------|---------|---------|-----------|-----------|--------------|
| LOC_Os01g58290 | 6.8700  | 2.0933  | -1.7145 | 0.0015112 | 0.0474887 | SBT3.5       |
| LOC_Os07g09190 | 20.6833 | 5.6500  | -1.8721 | 0.001512  | 0.0474887 | Os07g0190000 |
| LOC_Os09g21340 | 29.1600 | 59.7000 | 1.0337  | 0.0015198 | 0.0476768 | NAT6         |
| LOC_Os06g48240 | 1.1233  | 0.3833  | -1.5511 | 0.0015422 | 0.0481572 | bcs11b       |
| LOC_Os02g26790 | 23.7800 | 9.3933  | -1.3400 | 0.0015454 | 0.0482012 | -            |
| LOC_Os05g35010 | 2.8867  | 5.8900  | 1.0289  | 0.0015529 | 0.0483354 | CYP71A1      |
| LOC_Os03g09880 | 19.2633 | 4.9900  | -1.9487 | 0.0015605 | 0.0484485 | At5g48750    |
| LOC_Os01g41160 | 0.4100  | 0.0133  | -4.9425 | 0.0015639 | 0.048492  | FOXRED1      |
| LOC_Os04g28390 | 3.0367  | 0.0633  | -5.5834 | 0.0015655 | 0.048492  | -            |
| LOC_Os01g37460 | 5.1833  | 1.3267  | -1.9661 | 0.0015673 | 0.048492  | VAR3         |
| LOC_Os12g30610 | 4.0067  | 8.1500  | 1.0244  | 0.0015695 | 0.048507  | -            |
| LOC_Os03g32314 | 84.7900 | 37.9800 | -1.1587 | 0.0015887 | 0.0488965 | AOC3         |
| LOC_Os01g43480 | 30.0267 | 10.5900 | -1.5035 | 0.0015923 | 0.0488965 | atad1a       |
| LOC_Os12g02440 | 16.5867 | 8.0633  | -1.0406 | 0.0015991 | 0.0489722 | WRKY46       |
| LOC_Os11g07270 | 0.7033  | 1.9300  | 1.4563  | 0.001604  | 0.0490667 | At3g47570    |
| LOC_Os01g72900 | 20.8767 | 5.1133  | -2.0296 | 0.0016113 | 0.0491947 | ASR1         |
| LOC_Os02g42440 | 16.0033 | 6.6233  | -1.2727 | 0.0016118 | 0.0491947 | At5g08350    |
| LOC_Os06g29790 | 4.8400  | 1.4733  | -1.7159 | 0.0016142 | 0.0492122 | PHO1-3       |
| LOC_Os04g12580 | 8.0700  | 2.3700  | -1.7677 | 0.0016264 | 0.0495269 | RLK1         |
| LOC_Os12g42610 | 9.1733  | 4.0100  | -1.1938 | 0.0016313 | 0.0496211 | YAB6         |
| LOC_Os06g40240 | 0.0467  | 0.0010  | -5.5443 | 0.001639  | 0.0497555 | Os03g0733400 |
| LOC_Os07g03279 | 1.4067  | 0.1167  | -3.5918 | 0.0016409 | 0.0497555 | -            |
| LOC_Os12g24650 | 7.4867  | 1.9467  | -1.9433 | 0.0016478 | 0.0498998 | Os02g0794700 |

---



**Table S6.** DEGs involved in hormone signal transduction in WR04-6 and SN9816 plants under ABA or diniconazole treatment.

| Hormone               | Gene ID                      | log <sub>2</sub> (FC)   |        |        |        |        |
|-----------------------|------------------------------|-------------------------|--------|--------|--------|--------|
|                       |                              | WR_A                    | WR_D   | SN_A   | SN_D   |        |
| ABA                   | LOC_Os05g49730(Os05g0572700) | 3.139                   | 0      | 0      | 0      |        |
|                       | LOC_Os03g27280(SAPK1)        | 1.064                   | 0      | 0      | 0      |        |
|                       | LOC_Os01g64000(ABI5)         | 5.867                   | 0      | 0      | 0      |        |
|                       | LOC_Os05g39580(PYL5)         | 0                       | 0      | 0      | -3.787 |        |
| IAA                   | LOC_Os05g37470(Os05g0447200) | -1.335                  | -1.145 | 0      | -1.295 |        |
|                       | LOC_Os03g43410(IAA12)        | -1.404                  | -2.793 | 0      | 0      |        |
|                       | LOC_Os11g06820(LAX2)         | 0                       | -4.044 | 0      | 0      |        |
|                       | LOC_Os12g40900(IAA31)        | 0                       | -2.165 | 0      | 0      |        |
|                       | LOC_Os12g40890(IAA30)        | 0                       | -2.109 | 0      | 0      |        |
|                       | LOC_Os03g53150(IAA13)        | 0                       | -1.2   | 0      | 0      |        |
|                       | LOC_Os10g36703(SAUR32)       | 0                       | 0      | 0      | -2.339 |        |
|                       | ETH                          | LOC_Os08g39830(EIL3)    | 0      | 0      | 3.36   | 0      |
|                       |                              | LOC_Os07g22730(ERF1B)   | 0      | 5.008  | 0      | 0      |
| LOC_Os09g39850(ERF1B) |                              | 0                       | 2.338  | 0      | 0      |        |
| GA                    | LOC_Os12g41650(PIF1)         | 1.323                   | 1.276  | 0      | 1.066  |        |
|                       | LOC_Os01g45860(GAI)          | 0                       | -1.297 | 0      | 0      |        |
| CK                    | LOC_Os11g04720(ARR9)         | -2.591                  | 0      | 0      | 0      |        |
|                       | LOC_Os02g55320(ARR12)        | 0                       | 1.048  | 0      | 0      |        |
| SA                    | LOC_Os01g28450(-)            | -3.483                  | 0      | -4.795 | -4.388 |        |
|                       | LOC_Os01g28500(PRMS)         | 1.052                   | 1.003  | 2.157  | 0      |        |
|                       | LOC_Os10g11500(-)            | 4.741                   | 0      | 0      | 0      |        |
|                       | LOC_Os11g04600(NPR6)         | 0                       | -3.125 | 0      | -3.292 |        |
|                       | LOC_Os12g04410(NPR6)         | 0                       | -2.325 | 0      | 0      |        |
|                       | LOC_Os01g64020(-)            | 0                       | 1.143  | 0      | 0      |        |
|                       | LOC_Os08g07970(TGA4)         | 0                       | 1.06   | 0      | 0      |        |
|                       | LOC_Os01g59350(-)            | 0                       | 1.429  | 0      | 0      |        |
|                       | LOC_Os07g03458(-)            | 0                       | -5.019 | 0      | -3.748 |        |
|                       | LOC_Os07g03279(-)            | 0                       | -4.969 | 0      | -3.591 |        |
|                       | LOC_Os07g03368(-)            | 0                       | -4.892 | 0      | -3.657 |        |
|                       | LOC_Os07g03730(-)            | 0                       | -3.041 | -4.613 | -5.687 |        |
|                       | LOC_Os06g41100(-)            | 0                       | 0      | -1.867 | 0      |        |
|                       | LOC_Os07g03740(-)            | 0                       | 0      | -3.665 | -4.233 |        |
|                       | LOC_Os07g03600(-)            | 0                       | 0      | 0      | -3.863 |        |
|                       | LOC_Os07g03710(-)            | 0                       | 0      | 0      | -2.955 |        |
|                       | JA                           | LOC_Os04g32480(TIFY9)   | 0      | -2.814 | 0      | -2.712 |
|                       |                              | LOC_Os09g26780(TIFY10A) | 0      | -1.869 | 0      | 0      |
|                       |                              | LOC_Os07g42370(TIFY10A) | 0      | -1.55  | 0      | 0      |
|                       |                              | LOC_Os08g33160(TIFY6B)  | 0      | -1.217 | 0      | 0      |

LOC\_Os04g55920(TIFY3B)

0

-1.135

0

0

---

**Table S7.** Comparative analysis of defense-related genes in response to ABA or diniconazole treatment.

| Gene ID                                    | log <sub>2</sub> (FC) |        |        |        |
|--------------------------------------------|-----------------------|--------|--------|--------|
|                                            | WR_A                  | WR_D   | SN_A   | SN_D   |
| <b>plant-pathogens interaction pathway</b> |                       |        |        |        |
| LOC_Os01g18240(MYB86)                      | 0                     | -2.801 | 0      | 0      |
| LOC_Os01g28500(PRMS)                       | 1.052                 | 1.003  | 2.157  | 0      |
| LOC_Os01g36460(MYB2)                       | 0                     | -2.86  | 0      | 0      |
| LOC_Os01g50720(MYB2)                       | 0                     | -3.179 | 0      | -2.21  |
| LOC_Os02g30190(RIN4)                       | -3.22                 | -2.72  | 0      | 0      |
| LOC_Os03g06700(KCS11)                      | 0                     | -7.78  | 0      | -3.373 |
| LOC_Os03g06705(KCS11)                      | 0                     | -9.212 | 0      | -5.149 |
| LOC_Os03g25550(MYB86)                      | 0                     | -4.42  | 0      | 0      |
| LOC_Os03g26530(KCS12)                      | 0                     | -1.23  | 0      | 0      |
| LOC_Os03g57450(CPK1)                       | 0                     | -1.519 | 0      | 0      |
| LOC_Os04g02640(CUT1)                       | 0                     | -4.617 | 0      | 0      |
| LOC_Os04g50770(-)                          | 0                     | -2.776 | 0      | 0      |
| LOC_Os05g04820(MYB86)                      | 0                     | -1.85  | 0      | 0      |
| LOC_Os07g03279(-)                          | 0                     | -4.969 | 0      | -3.591 |
| LOC_Os07g03368(-)                          | 0                     | -4.892 | 0      | -3.657 |
| LOC_Os07g03458(-)                          | 0                     | -5.109 | 0      | -3.748 |
| LOC_Os07g03730(-)                          | 0                     | -3.041 | -4.613 | -5.68  |
| LOC_Os07g44090(MYB86)                      | 0                     | -2.379 | 0      | 0      |
| LOC_Os07g48770(dfr1)                       | 0                     | -2.658 | 0      | 0      |
| LOC_Os08g33150(ODO1)                       | 0                     | -4.18  | 0      | -3.049 |
| LOC_Os08g38990(WRKY2)                      | 0                     | 1.61   | 0      | 1.496  |
| LOC_Os09g09490(RPM1)                       | 0                     | -1.454 | 0      | -1.584 |
| LOC_Os09g23620(ODO1)                       | 0                     | -2.301 | 0      | 0      |
| LOC_Os09g26660(RBOHE)                      | 0                     | -1.243 | 0      | 0      |
| LOC_Os09g36250(ODO1)                       | 0                     | -1.346 | 0      | 0      |
| LOC_Os10g39420(SPK)                        | 0                     | -1.502 | 0      | 0      |
| LOC_Os11g03440(MYB306)                     | 0                     | -3.103 | 0      | 0      |
| LOC_Os11g11960(RPM1)                       | -2.61                 | -2.175 | 0      | -2.125 |
| LOC_Os11g12040(RPM1)                       | 0                     | -2.465 | 0      | 0      |
| LOC_Os11g12300(RPM1)                       | -2.742                | -3.465 | 0      | 0      |
| LOC_Os11g12320(RPM1)                       | 0                     | -2.86  | -2.401 | 0      |
| LOC_Os11g35500(At3g47570)                  | 0                     | -1.804 | 0      | 0      |
| LOC_Os12g03150(MYB306)                     | 0                     | -5.186 | 0      | 0      |
| LOC_Os12g37690(MYB108)                     | 3.136                 | 1.582  | 0      | 0      |
| LOC_Os12g38400(RS2)                        | 0                     | -2.292 | 0      | 0      |
| LOC_Os01g03720(MYB108)                     | 2.976                 | 0      | 0      | 0      |
| LOC_Os01g28450(-)                          | -3.483                | 0      | -4.395 | -4.388 |

|                        |        |        |        |        |
|------------------------|--------|--------|--------|--------|
| LOC_Os01g32120(CML11)  | 1.608  | 0      | 1.52   | 0      |
| LOC_Os02g56860(KCS12)  | 3.15   | 0      | 0      | 0      |
| LOC_Os04g01740(HSP83A) | 2.972  | 0      | 0      | 0      |
| LOC_Os10g11500(-);     | 4.741  | 0      | 0      | 0      |
| LOC_Os10g33370(KCS12)  | 4.127  | 0      | 0      | 0      |
| LOC_Os12g07610(MYB98)  | -3.43  | 0      | 0      | 0      |
| LOC_Os12g32986(-)      | 1.152  | 0      | 0      | 0      |
| LOC_Os02g49920(KCS5)   | 0      | 0      | 2.306  | 0      |
| LOC_Os07g03740(-)      | 0      | 0      | -3.665 | -4.233 |
| LOC_Os11g12240(RPM1)   | 0      | 0      | -3.83  | 0      |
| LOC_Os11g12260(RPM1)   | 0      | 0      | -3.49  | 0      |
| LOC_Os11g12340(RPM1)   | -3.369 | -2.594 | 0      | 0      |
| LOC_Os01g72680(RPS5)   | 0      | 0      | 0      | -7.228 |
| LOC_Os03g59770(-)      | 0      | 0      | 0      | -2.412 |
| LOC_Os05g48010(RAX3)   | 0      | 0      | 0      | -1.808 |
| LOC_Os06g10580(CNGC20) | 0      | 0      | 0      | -1.268 |
| LOC_Os07g03600(-)      | 0      | 0      | 0      | -3.863 |
| LOC_Os07g03710(-)      | 0      | 0      | 0      | -2.955 |
| LOC_Os11g01390(CML25)  | 0      | 0      | 0      | -9.388 |
| LOC_Os11g04560(CML36)  | 0      | 0      | 0      | -2.097 |
| LOC_Os12g01400(CML25)  | 0      | 0      | 0      | -9.112 |
| LOC_Os12g04360(CML36)  | 0      | 0      | 0      | -2.299 |

---

**MAPK signaling pathway**

---

|                              |        |        |        |        |
|------------------------------|--------|--------|--------|--------|
| LOC_Os01g28500(PRMS)         | 1.052  | 1.003  | 2.157  | 0      |
| LOC_Os02g10290(HMA5)         | 1.059  | 1.081  | 0      | 0      |
| LOC_Os02g21700(ANP2)         | 0      | -2.169 | 0      | 0      |
| LOC_Os03g04060(Cht11)        | 0      | -2.231 | 0      | -2.428 |
| LOC_Os03g12390(MKK7)         | 0      | -1.018 | 0      | 0      |
| LOC_Os04g46940(HMA5)         | 0      | -1.325 | 0      | 0      |
| LOC_Os05g33130(Cht2)         | 4.188  | 5.946  | 0      | 0      |
| LOC_Os05g33140(Cht9)         | 0      | -1.828 | 0      | 0      |
| LOC_Os07g03279(-)            | 0      | -4.969 | 0      | -3.591 |
| LOC_Os07g03368(-)            | 0      | -4.892 | 0      | -3.657 |
| LOC_Os07g03458(-)            | 0      | -5.109 | 0      | -3.748 |
| LOC_Os07g03730(-)            | 0      | -3.041 | -4.613 | -5.68  |
| LOC_Os07g22730(ERF1B)        | 0      | 5.008  | 0      | 0      |
| LOC_Os07g48770(dfr1)         | 0      | -2.658 | 0      | 0      |
| LOC_Os09g26660(RBOHE)        | 0      | -1.243 | 0      | 0      |
| LOC_Os09g39850(ERF1B)        | 0      | 2.338  | 0      | 0      |
| LOC_Os01g28450(-)            | -3.483 | 0      | -4.395 | -4.388 |
| LOC_Os03g27280(SAPK1)        | 1.064  | 0      | 0      | 0      |
| LOC_Os05g49730(Os05g0572700) | 3.139  | 0      | 0      | 0      |
| LOC_Os06g51050(Cht3)         | 3.948  | 0      | 0      | 0      |

|                      |       |   |        |        |
|----------------------|-------|---|--------|--------|
| LOC_Os06g51060(Cht1) | 3.334 | 0 | 0      | 0      |
| LOC_Os07g03740(-)    | 0     | 0 | -3.665 | -4.233 |
| LOC_Os08g39830(EIL3) | 0     | 0 | 3.363  | 0      |
| LOC_Os10g11500(-)    | 4.741 | 0 | 0      | 0      |

---

**Table S8.** DEGs of transcription factors (TFs) expressed differentially in the four pairwise comparisons of transcriptomes.

| <b>Gene ID</b>        | <b>Symbol</b> | <b>log<sub>2</sub>(FC)</b> | <b>PValue</b> | <b>FDR</b> |
|-----------------------|---------------|----------------------------|---------------|------------|
| <b>WR_CK vs. WR_A</b> |               |                            |               |            |
| LOC_Os02g13800        | HSFC2A        | 3.376836436                | 8.12E-14      | 9E-11      |
| LOC_Os06g09660        | ARF16         | 1.820914999                | 8.62E-12      | 5.43E-09   |
| LOC_Os04g45810        | HOX22         | 2.412027539                | 5.27E-11      | 2.81E-08   |
| LOC_Os12g03040        | ONAC010       | 2.706803624                | 1.79E-10      | 8.28E-08   |
| LOC_Os03g21710        | WRKY70        | -5.044394119               | 6.84E-10      | 2.67E-07   |
| LOC_Os11g02480        | WRKY55        | 1.510148503                | 1.26E-09      | 4.31E-07   |
| LOC_Os12g37690        | MYB108        | 3.136150121                | 1.32E-09      | 4.42E-07   |
| LOC_Os11g03300        | ONAC010       | 2.22881869                 | 7.81E-09      | 2.06E-06   |
| LOC_Os01g64000        | ABI5          | 5.867896464                | 1.52E-08      | 3.8E-06    |
| LOC_Os05g46370        | BHLH87        | 2.125434235                | 6.38E-08      | 1.28E-05   |
| LOC_Os02g46030        | RVE1          | 2.527598926                | 4.43E-07      | 6.67E-05   |
| LOC_Os10g39130        | MADS56        | -3.032860187               | 4.6E-07       | 6.88E-05   |
| LOC_Os07g48550        | NAC100        | 1.903400277                | 4.62E-07      | 6.88E-05   |
| LOC_Os10g42490        | ROC3          | -1.647118977               | 5.32E-06      | 0.000508   |
| LOC_Os02g43820        | ERF5          | 2.042591877                | 1.59E-05      | 0.001155   |
| LOC_Os04g31290        | FIT           | 4.640893776                | 3.55E-05      | 0.002244   |
| LOC_Os08g43334        | HSFB2B        | 2.335155254                | 3.74E-05      | 0.002322   |
| LOC_Os03g42280        | Os03g062040   | -1.9274875                 | 5.18E-05      | 0.003037   |
| LOC_Os02g16680        | BZIP9         | 1.072813285                | 5.63E-05      | 0.003259   |
| LOC_Os01g57580        | BHLH123       | -1.29161247                | 5.74E-05      | 0.003316   |
| LOC_Os08g19590        | ROC4          | -1.023513595               | 7.13E-05      | 0.003913   |
| LOC_Os05g10670        | Os05g019520   | 2.023744354                | 8.02E-05      | 0.004265   |
| LOC_Os01g15900        | CDF2          | 2.662907662                | 8.16E-05      | 0.004318   |
| LOC_Os06g46270        | NAC021        | 1.545532356                | 0.000108      | 0.005337   |
| LOC_Os04g28580        | FRS5          | 7.736965594                | 0.000112      | 0.005498   |
| LOC_Os06g30830        | AGL61         | 2.703188582                | 0.000162      | 0.00738    |
| LOC_Os06g40150        | WIN1          | 4.925095191                | 0.000166      | 0.0075     |
| LOC_Os03g45450        | WRKY71        | -2.448145811               | 0.000198      | 0.00867    |
| LOC_Os03g20910        | WOX6          | 7.824428435                | 0.000212      | 0.009111   |
| LOC_Os01g03720        | MYB108        | 2.976747269                | 0.00022       | 0.009285   |
| LOC_Os01g39020        | HSFA6B        | 2.374635145                | 0.00032       | 0.012409   |
| LOC_Os02g36880        | NAC100        | 1.810660755                | 0.000339      | 0.012978   |
| LOC_Os12g02420        | WRKY55        | 1.105865864                | 0.000341      | 0.01302    |
| LOC_Os01g68370        | VP1           | 6.781359714                | 0.000347      | 0.013154   |
| LOC_Os06g36680        | ATH1          | -4.087462841               | 0.000356      | 0.013455   |
| LOC_Os04g32620        | ERF113        | 1.88373752                 | 0.000364      | 0.013656   |
| LOC_Os01g06640        | BHLH51        | 1.59657713                 | 0.000486      | 0.017219   |
| LOC_Os03g17810        | LBD1          | 2.829584869                | 0.000604      | 0.020216   |

|                |              |              |          |          |
|----------------|--------------|--------------|----------|----------|
| LOC_Os08g42470 | BHLH137      | 4.505528033  | 0.000611 | 0.020446 |
| LOC_Os02g43330 | HOX24        | 3.612774351  | 0.000666 | 0.021914 |
| LOC_Os03g63810 | WRKY35       | 1.690671942  | 0.000668 | 0.02196  |
| LOC_Os06g51260 | RVE2         | 3.304957815  | 0.00072  | 0.023203 |
| LOC_Os12g07610 | MYB98        | -3.430350555 | 0.000743 | 0.023596 |
| LOC_Os12g02470 | WRKY53       | -4.700439718 | 0.000989 | 0.029223 |
| LOC_Os02g43170 | BBX21        | -1.685583741 | 0.00099  | 0.029223 |
| LOC_Os12g06010 | -            | 5.196397213  | 0.001001 | 0.029298 |
| LOC_Os04g48070 | ROC4         | 1.472997966  | 0.0011   | 0.031386 |
| LOC_Os02g53620 | NFYA5        | -1.640815735 | 0.0012   | 0.033038 |
| LOC_Os12g41650 | PIF1         | 1.323306905  | 0.001363 | 0.036377 |
| LOC_Os07g48260 | WRKY54       | -1.717094391 | 0.001441 | 0.037719 |
| LOC_Os02g07170 | KAN2         | 2.642447995  | 0.001548 | 0.039783 |
| LOC_Os09g25070 | WRKY40       | -3.561007769 | 0.001709 | 0.042612 |
| LOC_Os01g71790 | NAC018       | -1.82687561  | 0.001788 | 0.044031 |
| LOC_Os04g47080 | LC           | 2.611434712  | 0.001833 | 0.044627 |
| LOC_Os01g53650 | Os01g0738400 | 8.22881869   | 0.00199  | 0.047375 |
| LOC_Os02g34630 | TERF1        | 1.163        | 0.00204  | 0.048269 |

---

**WR\_CK vs. WR\_D**

---

|                |              |              |          |          |
|----------------|--------------|--------------|----------|----------|
| LOC_Os01g06640 | BHLH51       | 2.215115406  | 6.79E-19 | 1.6E-15  |
| LOC_Os08g33150 | ODO1         | -4.180164186 | 7.16E-14 | 6.29E-11 |
| LOC_Os11g07460 | PCF3         | -2.5980525   | 3.41E-13 | 2.25E-10 |
| LOC_Os01g18240 | MYB86        | -2.801381021 | 7E-12    | 3.05E-09 |
| LOC_Os03g03164 | HOS66        | -2.722225796 | 5.69E-10 | 1.48E-07 |
| LOC_Os07g44090 | MYB86        | -2.379704426 | 1E-09    | 2.27E-07 |
| LOC_Os06g04090 | NAC043       | -3.402212284 | 3.71E-09 | 6.7E-07  |
| LOC_Os01g41900 | DIVARICAT    | -2.196055244 | 3.72E-09 | 6.7E-07  |
| LOC_Os05g49240 | RL3          | -6.266786541 | 7.23E-09 | 1.2E-06  |
| LOC_Os12g03150 | MYB306       | -5.186160104 | 2.56E-08 | 3.33E-06 |
| LOC_Os12g03040 | ONAC010      | 2.487793842  | 2.63E-08 | 3.4E-06  |
| LOC_Os05g48850 | NAC073       | -2.105957175 | 3.96E-08 | 4.88E-06 |
| LOC_Os01g45730 | Os01g0645000 | -4.165931932 | 4.52E-08 | 5.46E-06 |
| LOC_Os01g11550 | PCF5         | -2.981852653 | 4.75E-08 | 5.7E-06  |
| LOC_Os04g50770 | -            | -2.776138289 | 1.21E-07 | 1.28E-05 |
| LOC_Os04g56990 | PHL1         | 1.692445545  | 4.01E-07 | 3.45E-05 |
| LOC_Os10g39130 | MADS56       | -1.325954598 | 4.38E-07 | 3.69E-05 |
| LOC_Os11g03300 | ONAC010      | 2.178487015  | 6.17E-07 | 5.06E-05 |
| LOC_Os09g25070 | WRKY40       | -3.933484806 | 8.6E-07  | 6.65E-05 |
| LOC_Os05g47650 | Os05g0549800 | 1.675142116  | 1.1E-06  | 8.14E-05 |
| LOC_Os02g13800 | HSFC2A       | 1.725728622  | 1.19E-06 | 8.64E-05 |
| LOC_Os03g21710 | WRKY70       | -3.158565139 | 1.23E-06 | 8.86E-05 |
| LOC_Os02g43170 | BBX21        | -1.050214985 | 1.52E-06 | 0.000105 |
| LOC_Os01g01840 | -            | -3.262280112 | 2.5E-06  | 0.000159 |

|                |             |              |          |          |
|----------------|-------------|--------------|----------|----------|
| LOC_Os01g39020 | HSFA6B      | 2.146435472  | 3.03E-06 | 0.000187 |
| LOC_Os01g50720 | MYB2        | -3.179056013 | 3.33E-06 | 0.000203 |
| LOC_Os12g41060 | EREBP1      | -2.700439718 | 3.51E-06 | 0.000212 |
| LOC_Os03g04310 | BHLH93      | -4.119739244 | 5.48E-06 | 0.000309 |
| LOC_Os05g04820 | MYB86       | -1.853897508 | 5.95E-06 | 0.000332 |
| LOC_Os03g25550 | MYB86       | -4.420662048 | 7.22E-06 | 0.000395 |
| LOC_Os03g44710 | YAB2        | -1.552803833 | 8.26E-06 | 0.000443 |
| LOC_Os12g38400 | RS2         | -2.292625959 | 8.56E-06 | 0.000455 |
| LOC_Os12g41650 | PIF1        | 1.276265312  | 1.34E-05 | 0.000668 |
| LOC_Os01g71970 | SCL3        | 1.025597896  | 1.35E-05 | 0.000675 |
| LOC_Os08g37730 | BHLH96      | -2.121015401 | 0.000016 | 0.000768 |
| LOC_Os11g02520 | WRKY46      | -3.552782095 | 1.71E-05 | 0.000808 |
| LOC_Os05g10670 | Os05g019520 | 1.583342405  | 2.55E-05 | 0.001096 |
| LOC_Os01g36460 | MYB2        | -2.860405693 | 2.84E-05 | 0.001181 |
| LOC_Os07g02060 | WRKY57      | 1.755461938  | 4.44E-05 | 0.001715 |
| LOC_Os11g03440 | MYB306      | -3.103582507 | 4.56E-05 | 0.00175  |
| LOC_Os09g26210 | ZFP2        | -1.275084867 | 4.92E-05 | 0.001844 |
| LOC_Os09g36250 | ODO1        | -1.346097018 | 5.43E-05 | 0.001991 |
| LOC_Os11g02540 | WRKY70      | -3.782851753 | 6.14E-05 | 0.002206 |
| LOC_Os10g26500 | HOX23       | -2.260235772 | 7.13E-05 | 0.002481 |
| LOC_Os05g28320 | MYB44       | -5.285402219 | 8.18E-05 | 0.002784 |
| LOC_Os02g09830 | BZIP43      | 2.818974005  | 9.01E-05 | 0.003018 |
| LOC_Os03g11600 | DL          | -2.078569052 | 9.72E-05 | 0.003218 |
| LOC_Os04g46350 | HOX17       | -1.170869483 | 0.0001   | 0.003299 |
| LOC_Os06g30830 | AGL61       | 2.317150955  | 0.000102 | 0.003349 |
| LOC_Os11g48000 | RBE         | -1.87698911  | 0.000104 | 0.003391 |
| LOC_Os10g39750 | BHLH93      | -2.732212064 | 0.000115 | 0.003671 |
| LOC_Os09g23620 | ODO1        | -2.301169535 | 0.000128 | 0.004012 |
| LOC_Os08g38990 | WRKY2       | 1.610108567  | 0.00015  | 0.004517 |
| LOC_Os02g41800 | ARF8        | -1.193451237 | 0.000151 | 0.00454  |
| LOC_Os05g51160 | DIVARICAT   | -1.774137145 | 0.000154 | 0.004589 |
| LOC_Os10g41130 | ERF034      | -1.637429921 | 0.000165 | 0.004823 |
| LOC_Os02g51280 | TCP14       | -1.614406279 | 0.000195 | 0.005533 |
| LOC_Os02g50630 | E2FE        | -2.263034406 | 0.000213 | 0.005937 |
| LOC_Os06g06900 | SPT         | -1.115889711 | 0.000221 | 0.006123 |
| LOC_Os04g28280 | BHLH62      | -2.611929548 | 0.000246 | 0.006687 |
| LOC_Os02g43970 | ERF034      | -1.861539465 | 0.000254 | 0.006838 |
| LOC_Os01g53260 | WRKY24      | 1.362108047  | 0.000262 | 0.007009 |
| LOC_Os09g39850 | ERF1B       | 2.338558769  | 0.000296 | 0.007717 |
| LOC_Os01g59350 | -           | 1.429364281  | 0.000317 | 0.008158 |
| LOC_Os11g01550 | LBD12       | 1.352789059  | 0.000335 | 0.008567 |
| LOC_Os04g59380 | -           | -2.123382416 | 0.000339 | 0.008654 |
| LOC_Os10g23090 | HOX8        | 2.258447136  | 0.000355 | 0.008916 |



|                |             |              |          |          |
|----------------|-------------|--------------|----------|----------|
| LOC_Os05g41240 | PHL1        | 1.223772991  | 0.000397 | 0.009724 |
| LOC_Os02g41450 | NAC031      | -8.896836931 | 0.000451 | 0.01075  |
| LOC_Os11g05740 | Os11g015600 | -4.075288127 | 0.000471 | 0.011078 |
| LOC_Os08g09840 | Os03g073340 | -1.505690633 | 0.000473 | 0.011104 |
| LOC_Os07g22730 | ERF1B       | 5.008988783  | 0.000536 | 0.012332 |
| LOC_Os06g50830 | FD          | -2.567684509 | 0.000553 | 0.012656 |
| LOC_Os12g41680 | NAC021      | 1.003195884  | 0.000575 | 0.013074 |
| LOC_Os06g35960 | HSFC2B      | 1.369772766  | 0.000614 | 0.013815 |
| LOC_Os06g36680 | ATH1        | -2.91753784  | 0.000689 | 0.015129 |
| LOC_Os05g10620 | NAC073      | 1.171980416  | 0.0007   | 0.015304 |
| LOC_Os09g21180 | HOX25       | 1.169925001  | 0.000702 | 0.015327 |
| LOC_Os02g43330 | HOX24       | 2.852378006  | 0.000703 | 0.015338 |
| LOC_Os09g31300 | BHLH130     | 1.252750927  | 0.000707 | 0.01539  |
| LOC_Os01g64020 | -           | 1.143667141  | 0.00072  | 0.015537 |
| LOC_Os02g04640 | PHL1        | 1.11300317   | 0.000728 | 0.015679 |
| LOC_Os03g41330 | LBD37       | 1.799179543  | 0.000754 | 0.016134 |
| LOC_Os02g55320 | ARR12       | 1.048322266  | 0.000802 | 0.016847 |
| LOC_Os06g51070 | NAC68       | -1.436201396 | 0.000837 | 0.017385 |
| LOC_Os01g39330 | BHLH        | -2.183518559 | 0.000858 | 0.017767 |
| LOC_Os06g50600 | FD          | -1.98550043  | 0.00086  | 0.017799 |
| LOC_Os04g43560 | NAC054      | -2.992466327 | 0.000864 | 0.017843 |
| LOC_Os02g53620 | NFYA5       | -1.192934979 | 0.000885 | 0.018212 |
| LOC_Os06g04870 | HOX2        | -1.524567903 | 0.000899 | 0.018457 |
| LOC_Os01g21590 | -           | 2.123828587  | 0.000905 | 0.018548 |
| LOC_Os08g07970 | TGA4        | 1.060120992  | 0.000907 | 0.01857  |
| LOC_Os10g40810 | GATA2       | -1.332913136 | 0.000928 | 0.018921 |
| LOC_Os01g45860 | GAI         | -1.297904866 | 0.001295 | 0.024568 |
| LOC_Os12g01550 | LBD12       | 1.289754524  | 0.001326 | 0.024946 |
| LOC_Os01g24070 | GATA23      | -1.514830177 | 0.001552 | 0.028384 |
| LOC_Os11g02530 | WRKY70      | -3.549629428 | 0.001678 | 0.030019 |
| LOC_Os10g22600 | RAP2-13     | -1.834777618 | 0.001806 | 0.03173  |
| LOC_Os05g25770 | WRKY70      | -2.190910857 | 0.001822 | 0.031935 |
| LOC_Os04g33950 | E2FB        | -1.575502171 | 0.001822 | 0.031935 |
| LOC_Os05g34830 | NAC48       | 1.243303623  | 0.00191  | 0.032971 |
| LOC_Os12g37690 | MYB108      | 1.582125341  | 0.001964 | 0.0336   |
| LOC_Os03g45450 | WRKY71      | -1.864901828 | 0.002134 | 0.03577  |
| LOC_Os04g58020 | DIVARICAT   | 1.150879385  | 0.002253 | 0.037268 |
| LOC_Os02g46560 | BHLH96      | -1.57699179  | 0.002273 | 0.037511 |
| LOC_Os11g04960 | NAC029      | -1.076922817 | 0.002329 | 0.038136 |
| LOC_Os02g46030 | RVE1        | 1.413161677  | 0.002337 | 0.03825  |
| LOC_Os12g02400 | WRKY70      | -2.007234866 | 0.002593 | 0.041249 |
| LOC_Os03g10210 | HOX12       | 1.925765044  | 0.002626 | 0.041626 |
| LOC_Os06g50480 | TRAB1       | -3.861293729 | 0.002671 | 0.042137 |

|                |        |              |          |          |
|----------------|--------|--------------|----------|----------|
| LOC_Os11g02470 | WRKY54 | -2.292781749 | 0.003068 | 0.046912 |
|----------------|--------|--------------|----------|----------|

---

**SN\_CK vs. SN\_A**

---

|                |             |              |          |          |
|----------------|-------------|--------------|----------|----------|
| LOC_Os10g39130 | MADS56      | -2.231398616 | 3.9E-08  | 3.49E-05 |
| LOC_Os05g46370 | BHLH87      | 2.430304256  | 2.27E-07 | 0.000164 |
| LOC_Os07g48260 | WRKY54      | -2.549232714 | 2.31E-07 | 0.000164 |
| LOC_Os06g04010 | Os06g013060 | 1.448175432  | 1.17E-06 | 0.00056  |
| LOC_Os11g47630 | ZAT8        | -3.774670114 | 1.25E-06 | 0.000587 |
| LOC_Os09g25070 | WRKY40      | -2.856051484 | 2.79E-06 | 0.001017 |
| LOC_Os03g21710 | WRKY70      | -3.058691899 | 3.67E-06 | 0.001188 |
| LOC_Os12g01490 | KAN4        | -2.920031695 | 5.98E-06 | 0.001692 |
| LOC_Os01g09990 | BHLH        | -4.168811381 | 7.08E-06 | 0.001945 |
| LOC_Os06g41100 | -           | -1.866997868 | 2.36E-05 | 0.005157 |
| LOC_Os06g06750 | MADS5       | -8.74819285  | 3.62E-05 | 0.007128 |
| LOC_Os05g29810 | RAP2-3      | 2.647118977  | 7.62E-05 | 0.012475 |
| LOC_Os03g47016 | OSH10       | -2.724597037 | 0.00014  | 0.018879 |
| LOC_Os02g53100 | WRKY9       | -4.370457989 | 0.000148 | 0.019758 |
| LOC_Os11g01480 | KAN4        | -2.378131517 | 0.000182 | 0.022987 |
| LOC_Os02g55380 | ERF003      | 2.570043081  | 0.000295 | 0.031629 |
| LOC_Os08g39830 | EIL3        | 3.360747344  | 0.000335 | 0.034718 |
| LOC_Os02g49480 | BIM1        | -1.747085475 | 0.000389 | 0.038096 |
| LOC_Os06g37410 | BHLH        | -3.359777356 | 0.000414 | 0.039492 |
| LOC_Os08g41960 | AGL3        | 2.563069895  | 0.000478 | 0.043459 |

---

**SN\_CK vs. SN\_D**

---

|                |             |              |          |          |
|----------------|-------------|--------------|----------|----------|
| LOC_Os03g21710 | WRKY70      | -3.329819987 | 2.81E-16 | 8.45E-13 |
| LOC_Os11g47630 | ZAT8        | -5.620960699 | 1.18E-09 | 6.22E-07 |
| LOC_Os02g53100 | WRKY9       | -6.296457407 | 3.44E-08 | 1.19E-05 |
| LOC_Os08g33150 | ODO1        | -3.04977397  | 9.29E-08 | 2.79E-05 |
| LOC_Os05g25770 | WRKY70      | -1.661978825 | 2.23E-07 | 5.79E-05 |
| LOC_Os07g48260 | WRKY54      | -2.054559099 | 5.55E-07 | 0.000123 |
| LOC_Os03g44710 | YAB2        | -1.506860017 | 6.33E-07 | 0.000137 |
| LOC_Os01g40430 | WRKY9       | -10.36267444 | 1.09E-06 | 0.00021  |
| LOC_Os05g45410 | HSFA4D      | -2.300275727 | 1.1E-06  | 0.00021  |
| LOC_Os06g04010 | Os06g013060 | 1.467535228  | 2.59E-06 | 0.000425 |
| LOC_Os06g41770 | BZIP60      | -1.214079675 | 2.85E-06 | 0.00045  |
| LOC_Os11g02530 | WRKY70      | -3.106712336 | 3.35E-06 | 0.000507 |
| LOC_Os02g49480 | BIM1        | -1.844905597 | 3.39E-06 | 0.000507 |
| LOC_Os10g39750 | BHLH93      | -4.054447784 | 4.99E-06 | 0.000688 |
| LOC_Os11g48000 | RBE         | -2.693376326 | 7.3E-06  | 0.000947 |
| LOC_Os12g41650 | PIF1        | 1.066479402  | 1.91E-05 | 0.002028 |
| LOC_Os03g08460 | ERF073      | -2.6116944   | 2.2E-05  | 0.002287 |
| LOC_Os07g04560 | JUB1        | -3.498250868 | 3.38E-05 | 0.003295 |
| LOC_Os10g33760 | NAC021      | -2.529253068 | 3.6E-05  | 0.003453 |
| LOC_Os11g05614 | NAC090      | -1.827340031 | 4.46E-05 | 0.004055 |

|                |             |              |          |          |
|----------------|-------------|--------------|----------|----------|
| LOC_Os03g13400 | IDD14       | -7.94641896  | 5.87E-05 | 0.005009 |
| LOC_Os01g09990 | BHLH        | -4.071949842 | 5.87E-05 | 0.005009 |
| LOC_Os08g38990 | WRKY2       | 1.49683159   | 6.88E-05 | 0.005554 |
| LOC_Os01g53040 | WRKY65      | -2.114071767 | 8.6E-05  | 0.00658  |
| LOC_Os05g40960 | APL         | -2.708469258 | 8.7E-05  | 0.006625 |
| LOC_Os01g39330 | BHLH        | -1.748887498 | 0.000106 | 0.007591 |
| LOC_Os11g07460 | PCF3        | -1.819084215 | 0.000113 | 0.007922 |
| LOC_Os09g25070 | WRKY40      | -2.128060694 | 0.000144 | 0.009285 |
| LOC_Os10g26500 | HOX23       | -2.835830091 | 0.00015  | 0.009525 |
| LOC_Os10g42130 | NAC086      | -2.842125817 | 0.000157 | 0.009873 |
| LOC_Os03g04310 | BHLH93      | -3.061111514 | 0.000162 | 0.010147 |
| LOC_Os01g40260 | WRKY50      | -2.302514809 | 0.000162 | 0.010147 |
| LOC_Os05g46370 | BHLH87      | 2.226770862  | 0.000234 | 0.013302 |
| LOC_Os05g11414 | MADS58      | 2.591446534  | 0.000272 | 0.014965 |
| LOC_Os11g02540 | WRKY70      | -2.65371164  | 0.000285 | 0.015423 |
| LOC_Os03g47016 | OSH10       | -2.590295945 | 0.000312 | 0.016419 |
| LOC_Os01g39020 | HSFA6B      | 1.832958978  | 0.00038  | 0.01843  |
| LOC_Os06g37410 | BHLH        | -3.078595603 | 0.00042  | 0.019706 |
| LOC_Os05g48010 | RAX3        | -1.808844925 | 0.000423 | 0.019828 |
| LOC_Os01g50720 | MYB2        | -2.210604562 | 0.000586 | 0.024985 |
| LOC_Os09g10980 | WIP5        | -4.676460855 | 0.000645 | 0.026874 |
| LOC_Os11g02520 | WRKY46      | -2.435495855 | 0.000722 | 0.028717 |
| LOC_Os03g11600 | DL          | -2.640457613 | 0.000818 | 0.03147  |
| LOC_Os03g45450 | WRKY71      | -1.914467023 | 0.000832 | 0.031809 |
| LOC_Os07g27670 | WRKY41      | -1.499478285 | 0.001076 | 0.037388 |
| LOC_Os06g51070 | NAC68       | -1.354264077 | 0.001152 | 0.039326 |
| LOC_Os06g11860 | RAP2-4      | -1.218886187 | 0.001438 | 0.045763 |
| LOC_Os05g41790 | Os05g049750 | 1.1140598    | 0.001472 | 0.046668 |
| LOC_Os12g02440 | WRKY46      | -1.040575716 | 0.001599 | 0.048972 |
| LOC_Os12g42610 | YAB6        | -1.193843828 | 0.001631 | 0.049621 |

**Table S9.** Differentially expressed genes (DEGs) had unique expression profiles in WR04-6 under ABA or diniconazole treatment.

| Gene ID                            | log <sub>2</sub> (FC) |           |      |      |
|------------------------------------|-----------------------|-----------|------|------|
|                                    | WR_A                  | WR_D      | SN_A | SN_D |
| <b>ROS homeostasis</b>             |                       |           |      |      |
| LOC_Os06g23780                     | 8.3368784             | 0         | 0    | 0    |
| LOC_Os07g46990                     | 1.7223687             | 0         | 0    | 0    |
| LOC_Os04g53210                     | 2.5258242             | 1.5623235 | 0    | 0    |
| LOC_Os09g32290                     | 0                     | 1.4517638 | 0    | 0    |
| LOC_Os08g44360                     | 0                     | 1.3423922 | 0    | 0    |
| LOC_Os01g49710                     | 2.4372206             | 1.2755823 | 0    | 0    |
| LOC_Os10g38470                     | 0                     | 1.4925566 | 0    | 0    |
| LOC_Os06g12290                     | 4.959697              | 2.9319816 | 0    | 0    |
| LOC_Os11g29400                     | 0                     | 1.5604745 | 0    | 0    |
| LOC_Os07g22350                     | 0                     | 1.100977  | 0    | 0    |
| LOC_Os04g35520                     | 0                     | 1.3328043 | 0    | 0    |
| LOC_Os10g38600                     | 0                     | 1.8781116 | 0    | 0    |
| LOC_Os10g38340                     | 0                     | 2.2033206 | 0    | 0    |
| LOC_Os10g38360                     | 0                     | 1.8499283 | 0    | 0    |
| LOC_Os10g38610                     | 2.186587              | 0         | 0    | 0    |
| LOC_Os10g38740                     | 2.0600643             | 1.7085711 | 0    | 0    |
| LOC_Os02g28110                     | 3.7458537             | 0         | 0    | 0    |
| <b>Hormone signal transduction</b> |                       |           |      |      |
| LOC_Os05g49730                     | 3.139                 | 0         | 0    | 0    |
| LOC_Os03g27280                     | 1.064                 | 0         | 0    | 0    |
| LOC_Os01g64000                     | 5.867                 | 0         | 0    | 0    |
| LOC_Os07g22730                     | 0                     | 5.008     | 0    | 0    |
| LOC_Os09g39850                     | 0                     | 2.338     | 0    | 0    |
| LOC_Os02g55320                     | 0                     | 1.048     | 0    | 0    |
| LOC_Os10g11500                     | 4.741                 | 0         | 0    | 0    |
| LOC_Os01g64020                     | 0                     | 1.143     | 0    | 0    |
| LOC_Os08g07970                     | 0                     | 1.06      | 0    | 0    |
| LOC_Os01g59350                     | 0                     | 1.429     | 0    | 0    |
| <b>defense-related genes</b>       |                       |           |      |      |
| LOC_Os01g18240                     | 0                     | -2.801    | 0    | 0    |
| LOC_Os01g36460                     | 0                     | -2.86     | 0    | 0    |
| LOC_Os02g30190                     | -3.22                 | -2.72     | 0    | 0    |
| LOC_Os03g25550                     | 0                     | -4.42     | 0    | 0    |
| LOC_Os03g26530                     | 0                     | -1.23     | 0    | 0    |
| LOC_Os03g57450                     | 0                     | -1.519    | 0    | 0    |
| LOC_Os04g02640                     | 0                     | -4.617    | 0    | 0    |
| LOC_Os04g50770                     | 0                     | -2.776    | 0    | 0    |

|                |        |        |   |   |
|----------------|--------|--------|---|---|
| LOC_Os05g04820 | 0      | -1.85  | 0 | 0 |
| LOC_Os07g44090 | 0      | -2.379 | 0 | 0 |
| LOC_Os07g48770 | 0      | -2.658 | 0 | 0 |
| LOC_Os09g23620 | 0      | -2.301 | 0 | 0 |
| LOC_Os09g26660 | 0      | -1.243 | 0 | 0 |
| LOC_Os09g36250 | 0      | -1.346 | 0 | 0 |
| LOC_Os10g39420 | 0      | -1.502 | 0 | 0 |
| LOC_Os11g03440 | 0      | -3.103 | 0 | 0 |
| LOC_Os11g12040 | 0      | -2.465 | 0 | 0 |
| LOC_Os11g12300 | -2.742 | -3.465 | 0 | 0 |
| LOC_Os11g35500 | 0      | -1.804 | 0 | 0 |
| LOC_Os12g03150 | 0      | -5.186 | 0 | 0 |
| LOC_Os12g37690 | 3.136  | 1.582  | 0 | 0 |
| LOC_Os12g38400 | 0      | -2.292 | 0 | 0 |
| LOC_Os01g03720 | 2.976  | 0      | 0 | 0 |
| LOC_Os02g56860 | 3.15   | 0      | 0 | 0 |
| LOC_Os04g01740 | 2.972  | 0      | 0 | 0 |
| LOC_Os10g11500 | 4.741  | 0      | 0 | 0 |
| LOC_Os10g33370 | 4.127  | 0      | 0 | 0 |
| LOC_Os12g07610 | -3.43  | 0      | 0 | 0 |
| LOC_Os12g32986 | 1.152  | 0      | 0 | 0 |
| LOC_Os11g12340 | -3.369 | -2.594 | 0 | 0 |

---

**MAPK signaling pathway**

|                |       |        |   |   |
|----------------|-------|--------|---|---|
| LOC_Os02g10290 | 1.059 | 1.081  | 0 | 0 |
| LOC_Os02g21700 | 0     | -2.169 | 0 | 0 |
| LOC_Os03g12390 | 0     | -1.018 | 0 | 0 |
| LOC_Os04g46940 | 0     | -1.325 | 0 | 0 |
| LOC_Os05g33130 | 4.188 | 5.946  | 0 | 0 |
| LOC_Os05g33140 | 0     | -1.828 | 0 | 0 |
| LOC_Os07g22730 | 0     | 5.008  | 0 | 0 |
| LOC_Os07g48770 | 0     | -2.658 | 0 | 0 |
| LOC_Os09g26660 | 0     | -1.243 | 0 | 0 |
| LOC_Os09g39850 | 0     | 2.338  | 0 | 0 |
| LOC_Os03g27280 | 1.064 | 0      | 0 | 0 |
| LOC_Os05g49730 | 3.139 | 0      | 0 | 0 |
| LOC_Os06g51050 | 3.948 | 0      | 0 | 0 |
| LOC_Os06g51060 | 3.334 | 0      | 0 | 0 |
| LOC_Os10g11500 | 4.741 | 0      | 0 | 0 |

---

**Transcription factors**

|                |        |        |   |   |
|----------------|--------|--------|---|---|
| LOC_Os02g13800 | 3.3768 | 1.7257 | 0 | 0 |
| LOC_Os06g09660 | 1.8209 | 0.0000 | 0 | 0 |
| LOC_Os04g45810 | 2.4120 | 0.0000 | 0 | 0 |
| LOC_Os12g03040 | 2.7068 | 2.4878 | 0 | 0 |

|                |         |         |   |   |
|----------------|---------|---------|---|---|
| LOC_Os11g02480 | 1.5101  | 0.0000  | 0 | 0 |
| LOC_Os12g37690 | 3.1362  | 1.5821  | 0 | 0 |
| LOC_Os11g03300 | 2.2288  | 2.1785  | 0 | 0 |
| LOC_Os01g64000 | 5.8679  | 0.0000  | 0 | 0 |
| LOC_Os02g46030 | 2.5276  | 1.4132  | 0 | 0 |
| LOC_Os07g48550 | 1.9034  | 0       | 0 | 0 |
| LOC_Os10g42490 | -1.6471 | 0       | 0 | 0 |
| LOC_Os02g43820 | 2.0426  | 0       | 0 | 0 |
| LOC_Os04g31290 | 4.6409  | 0       | 0 | 0 |
| LOC_Os08g43334 | 2.3352  | 0       | 0 | 0 |
| LOC_Os03g42280 | -1.9275 | 0       | 0 | 0 |
| LOC_Os02g16680 | 1.0728  | 0       | 0 | 0 |
| LOC_Os01g57580 | -1.2916 | 0       | 0 | 0 |
| LOC_Os08g19590 | -1.0235 | 0       | 0 | 0 |
| LOC_Os05g10670 | 2.0237  | 1.5833  | 0 | 0 |
| LOC_Os01g15900 | 2.6629  | 0       | 0 | 0 |
| LOC_Os06g46270 | 1.5455  | 0       | 0 | 0 |
| LOC_Os04g28580 | 7.7370  | 0       | 0 | 0 |
| LOC_Os06g30830 | 2.7032  | 2.3172  | 0 | 0 |
| LOC_Os06g40150 | 4.9251  | 0       | 0 | 0 |
| LOC_Os03g20910 | 7.8244  | 0       | 0 | 0 |
| LOC_Os01g03720 | 2.9767  | 0       | 0 | 0 |
| LOC_Os02g36880 | 1.8107  | 0       | 0 | 0 |
| LOC_Os12g02420 | 1.1059  | 0       | 0 | 0 |
| LOC_Os01g68370 | 6.7814  | 0       | 0 | 0 |
| LOC_Os06g36680 | -4.0875 | -2.9175 | 0 | 0 |
| LOC_Os04g32620 | 1.8837  | 0       | 0 | 0 |
| LOC_Os01g06640 | 1.5966  | 2.2151  | 0 | 0 |
| LOC_Os03g17810 | 2.8296  | 0       | 0 | 0 |
| LOC_Os08g42470 | 4.5055  | 0       | 0 | 0 |
| LOC_Os02g43330 | 3.6128  | 2.8524  | 0 | 0 |
| LOC_Os03g63810 | 1.6907  | 0       | 0 | 0 |
| LOC_Os06g51260 | 3.3050  | 0       | 0 | 0 |
| LOC_Os12g07610 | -3.4304 | 0       | 0 | 0 |
| LOC_Os12g02470 | -4.7004 | 0       | 0 | 0 |
| LOC_Os02g43170 | -1.6856 | -1.0502 | 0 | 0 |
| LOC_Os12g06010 | 5.1964  | 0       | 0 | 0 |
| LOC_Os04g48070 | 1.4730  | 0       | 0 | 0 |
| LOC_Os02g53620 | -1.6408 | -1.1929 | 0 | 0 |
| LOC_Os02g07170 | 2.6424  | 0       | 0 | 0 |
| LOC_Os01g71790 | -1.8269 | 0       | 0 | 0 |
| LOC_Os04g47080 | 2.6114  | 0       | 0 | 0 |
| LOC_Os01g53650 | 8.2288  | 0       | 0 | 0 |

|                |        |           |   |   |
|----------------|--------|-----------|---|---|
| LOC_Os02g34630 | 1.1630 | 0         | 0 | 0 |
| LOC_Os01g18240 | 0      | -2.801381 | 0 | 0 |
| LOC_Os03g03164 | 0      | -2.722226 | 0 | 0 |
| LOC_Os07g44090 | 0      | -2.379704 | 0 | 0 |
| LOC_Os06g04090 | 0      | -3.402212 | 0 | 0 |
| LOC_Os01g41900 | 0      | -2.196055 | 0 | 0 |
| LOC_Os05g49240 | 0      | -6.266787 | 0 | 0 |
| LOC_Os12g03150 | 0      | -5.18616  | 0 | 0 |
| LOC_Os05g48850 | 0      | -2.105957 | 0 | 0 |
| LOC_Os01g45730 | 0      | -4.165932 | 0 | 0 |
| LOC_Os01g11550 | 0      | -2.981853 | 0 | 0 |
| LOC_Os04g50770 | 0      | -2.776138 | 0 | 0 |
| LOC_Os04g56990 | 0      | 1.6924455 | 0 | 0 |
| LOC_Os05g47650 | 0      | 1.6751421 | 0 | 0 |
| LOC_Os01g01840 | 0      | -3.26228  | 0 | 0 |
| LOC_Os12g41060 | 0      | -2.70044  | 0 | 0 |
| LOC_Os05g04820 | 0      | -1.853898 | 0 | 0 |
| LOC_Os03g25550 | 0      | -4.420662 | 0 | 0 |
| LOC_Os12g38400 | 0      | -2.292626 | 0 | 0 |
| LOC_Os01g71970 | 0      | 1.0255979 | 0 | 0 |
| LOC_Os08g37730 | 0      | -2.121015 | 0 | 0 |
| LOC_Os01g36460 | 0      | -2.860406 | 0 | 0 |
| LOC_Os07g02060 | 0      | 1.7554619 | 0 | 0 |
| LOC_Os11g03440 | 0      | -3.103583 | 0 | 0 |
| LOC_Os09g26210 | 0      | -1.275085 | 0 | 0 |
| LOC_Os09g36250 | 0      | -1.346097 | 0 | 0 |
| LOC_Os05g28320 | 0      | -5.285402 | 0 | 0 |
| LOC_Os02g09830 | 0      | 2.818974  | 0 | 0 |
| LOC_Os04g46350 | 0      | -1.170869 | 0 | 0 |
| LOC_Os09g23620 | 0      | -2.30117  | 0 | 0 |
| LOC_Os02g41800 | 0      | -1.193451 | 0 | 0 |
| LOC_Os05g51160 | 0      | -1.774137 | 0 | 0 |
| LOC_Os10g41130 | 0      | -1.63743  | 0 | 0 |
| LOC_Os02g51280 | 0      | -1.614406 | 0 | 0 |
| LOC_Os02g50630 | 0      | -2.263034 | 0 | 0 |
| LOC_Os06g06900 | 0      | -1.11589  | 0 | 0 |
| LOC_Os04g28280 | 0      | -2.61193  | 0 | 0 |
| LOC_Os02g43970 | 0      | -1.861539 | 0 | 0 |
| LOC_Os01g53260 | 0      | 1.362108  | 0 | 0 |
| LOC_Os09g39850 | 0      | 2.3385588 | 0 | 0 |
| LOC_Os01g59350 | 0      | 1.4293643 | 0 | 0 |
| LOC_Os11g01550 | 0      | 1.3527891 | 0 | 0 |
| LOC_Os04g59380 | 0      | -2.123382 | 0 | 0 |

|                |   |           |   |   |
|----------------|---|-----------|---|---|
| LOC_Os10g23090 | 0 | 2.2584471 | 0 | 0 |
| LOC_Os05g41240 | 0 | 1.223773  | 0 | 0 |
| LOC_Os02g41450 | 0 | -8.896837 | 0 | 0 |
| LOC_Os11g05740 | 0 | -4.075288 | 0 | 0 |
| LOC_Os08g09840 | 0 | -1.505691 | 0 | 0 |
| LOC_Os07g22730 | 0 | 5.0089888 | 0 | 0 |
| LOC_Os06g50830 | 0 | -2.567685 | 0 | 0 |
| LOC_Os12g41680 | 0 | 1.0031959 | 0 | 0 |
| LOC_Os06g35960 | 0 | 1.3697728 | 0 | 0 |
| LOC_Os05g10620 | 0 | 1.1719804 | 0 | 0 |
| LOC_Os09g21180 | 0 | 1.169925  | 0 | 0 |
| LOC_Os09g31300 | 0 | 1.2527509 | 0 | 0 |
| LOC_Os01g64020 | 0 | 1.1436671 | 0 | 0 |
| LOC_Os02g04640 | 0 | 1.1130032 | 0 | 0 |
| LOC_Os03g41330 | 0 | 1.7991795 | 0 | 0 |
| LOC_Os02g55320 | 0 | 1.0483223 | 0 | 0 |
| LOC_Os06g50600 | 0 | -1.9855   | 0 | 0 |
| LOC_Os04g43560 | 0 | -2.992466 | 0 | 0 |
| LOC_Os06g04870 | 0 | -1.524568 | 0 | 0 |
| LOC_Os01g21590 | 0 | 2.1238286 | 0 | 0 |
| LOC_Os08g07970 | 0 | 1.060121  | 0 | 0 |
| LOC_Os10g40810 | 0 | -1.332913 | 0 | 0 |
| LOC_Os01g45860 | 0 | -1.297905 | 0 | 0 |
| LOC_Os12g01550 | 0 | 1.2897545 | 0 | 0 |
| LOC_Os01g24070 | 0 | -1.51483  | 0 | 0 |
| LOC_Os10g22600 | 0 | -1.834778 | 0 | 0 |
| LOC_Os04g33950 | 0 | -1.575502 | 0 | 0 |
| LOC_Os05g34830 | 0 | 1.2433036 | 0 | 0 |
| LOC_Os04g58020 | 0 | 1.1508794 | 0 | 0 |
| LOC_Os02g46560 | 0 | -1.576992 | 0 | 0 |
| LOC_Os11g04960 | 0 | -1.076923 | 0 | 0 |
| LOC_Os12g02400 | 0 | -2.007235 | 0 | 0 |
| LOC_Os03g10210 | 0 | 1.925765  | 0 | 0 |
| LOC_Os06g50480 | 0 | -3.861294 | 0 | 0 |
| LOC_Os11g02470 | 0 | -2.292782 | 0 | 0 |

---

**Glycolysis and citrate (TCA) cycle**

---

|                |       |        |   |   |
|----------------|-------|--------|---|---|
| LOC_Os01g09460 | 2.541 | 1.767  | 0 | 0 |
| LOC_Os08g25720 | 1.07  | 0      | 0 | 0 |
| LOC_Os04g38540 | 0     | 2.234  | 0 | 0 |
| LOC_Os01g46950 | 0     | -1.367 | 0 | 0 |
| LOC_Os02g38920 | 2.391 | 1.355  | 0 | 0 |
| LOC_Os08g03290 | 1.108 | 0      | 0 | 0 |
| LOC_Os06g45710 | 3.32  | 1.858  | 0 | 0 |



|                |       |        |   |   |
|----------------|-------|--------|---|---|
| LOC_Os02g07260 | 1.238 | 0      | 0 | 0 |
| LOC_Os03g60370 | 2.294 | 1.174  | 0 | 0 |
| LOC_Os10g13700 | 0     | 3.017  | 0 | 0 |
| LOC_Os01g47080 | 0     | -1.248 | 0 | 0 |
| LOC_Os11g10980 | 1.398 | 0      | 0 | 0 |
| LOC_Os04g02900 | 0     | 1.149  | 0 | 0 |
| LOC_Os06g13720 | 3.935 | 2.569  | 0 | 0 |
| LOC_Os07g49250 | 0     | -6.824 | 0 | 0 |
| LOC_Os01g06660 | 1.894 | 1.543  | 0 | 0 |
| LOC_Os05g39320 | 3.584 | 0      | 0 | 0 |
| LOC_Os05g39310 | 8.956 | 0      | 0 | 0 |
| LOC_Os11g10520 | 0     | -5.448 | 0 | 0 |
| LOC_Os11g10480 | 2.554 | 1.576  | 0 | 0 |
| LOC_Os11g10510 | 6.476 | 2.556  | 0 | 0 |
| LOC_Os02g43194 | 0     | -3.829 | 0 | 0 |
| LOC_Os12g07810 | 0     | -3.147 | 0 | 0 |
| LOC_Os04g45720 | 0     | -2.732 | 0 | 0 |
| LOC_Os02g43280 | 0     | -1.918 | 0 | 0 |
| LOC_Os09g26880 | 0     | 1.367  | 0 | 0 |
| LOC_Os06g01630 | 1.05  | 0      | 0 | 0 |
| LOC_Os03g19250 | 0     | 1.195  | 0 | 0 |
| LOC_Os10g13700 | 0     | 3.017  | 0 | 0 |
| LOC_Os06g01630 | 1.05  | 0      | 0 | 0 |
| LOC_Os06g13720 | 3.935 | 2.569  | 0 | 0 |
| LOC_Os04g02900 | 0     | 1.149  | 0 | 0 |
| LOC_Os11g47120 | 0     | -1.831 | 0 | 0 |
| LOC_Os11g47330 | 0     | -1.125 | 0 | 0 |
| LOC_Os08g33720 | 0     | -1.8   | 0 | 0 |
| LOC_Os01g61380 | 0     | 1.994  | 0 | 0 |

---

**Table S10.** Gene-specific primers for RT-qPCR analysis.

| id                    | Primer Sequence        |                        |
|-----------------------|------------------------|------------------------|
|                       | Forward (5'-3')        | Reverse (5'-3')        |
| <i>LOC_Os11g46900</i> | CTACATCGATCCTGCCTACATC | AATACTTGGCAAAGCTTAACGG |
| <i>LOC_Os08g26230</i> | TTTCTAGGTGTTTGTCTTCGA  | GATGGAGTTGATCGATTTCGGG |
| <i>LOC_Os06g29730</i> | TTAAGCTGCTCGTTTTCTGATG | TATGCAAGGATCACGTGGATTA |
| <i>LOC_Os04g39300</i> | TTATCCGATCTACGAACCGATC | GAAACACACTAAAGACGCACAT |
| <i>LOC_Os01g68740</i> | AGTGTCATCTCCTCCACAAATT | GTCAGTGGAGGAATTGGAGTAG |
| <i>LOC_Os01g02780</i> | CAGCTGGATGATGATACAAACG | TCGATTGAAGACAGATCAGACC |
| <i>LOC_Os02g28340</i> | AACACGTACGTCGAGTAGATTT | TGGATTCATCCCAGGTTTTGAT |
| <i>LOC_Os05g39770</i> | GTAATATGTCCTGCAAACCCAC | TTTCAACATTTACATCGCCTGG |
| <i>LOC_Os03g25490</i> | TCAAAAGGAAGTGGATACGGAA | TGTCCAGGTAAGAAGAAGTGAC |
| <i>LOC_Os01g28500</i> | TACAATGTTTCACTGCTCCGAT | CCAGAAGATGTTCTCACCGTAC |
| <i>LOC_Os04g41620</i> | TTGTGACAAGAGCAACAAACAG | GTTGAAGTTCCATGAGATCTGC |
| <i>LOC_Os10g26940</i> | GCACCTTCACATACGAACATAC | AACTCATTCGCTATATCTGGCA |
| <i>OsActin</i>        | ACCATTGGTGCTGAGCGTTT   | CGCAGCTTCCATTCTATGAA   |
